# Supplementary material for: A sheep pangenome reveals the spectrum of structural variations and their effects on tail phenotypes
Source: HighWire-hosted journal article supplement (doi:10.1101/gr.277372.122), 2023-03-01
Supplement: Supplemental_Tables-20230207.xlsx [file Supplemental_Tables-20230207.xlsx]

## Sheet: S1
Supplemental Table S1 Sample list of the Illumina short-read data.
ID	Region	SRR	Breed	Group	Group code	Species	Depth (×)	tail type
MAOA-BEG01	Africa	ERR299462	Morocco	Morocco	MAOA	Ovis aries	11.084	long thin-tailed
MAOA-BJD01	Africa	ERR232498	Morocco	Morocco	MAOA	Ovis aries	14.82	long thin-tailed
MAOA-DMN01	Africa	ERR277070	Morocco	Morocco	MAOA	Ovis aries	14.741	long thin-tailed
MAOA-DMN02	Africa	ERR283428	Morocco	Morocco	MAOA	Ovis aries	14.071	long thin-tailed
MAOA-LOC01	Africa	ERR232488	Morocco	Morocco	MAOA	Ovis aries	12.993	long thin-tailed
MAOA-LOC02	Africa	ERR232490	Morocco	Morocco	MAOA	Ovis aries	13.953	long thin-tailed
MAOA-LOC03	Africa	ERR263657	Morocco	Morocco	MAOA	Ovis aries	13.976	long thin-tailed
MAOA-LOC04	Africa	ERR277073	Morocco	Morocco	MAOA	Ovis aries	13.914	long thin-tailed
MAOA-LOC05	Africa	ERR277075	Morocco	Morocco	MAOA	Ovis aries	15.85	long thin-tailed
MAOA-LOC06	Africa	ERR283420	Morocco	Morocco	MAOA	Ovis aries	14.077	long thin-tailed
MAOA-LOC07	Africa	ERR283425	Morocco	Morocco	MAOA	Ovis aries	14.248	long thin-tailed
MAOA-LOC08	Africa	ERR296823	Morocco	Morocco	MAOA	Ovis aries	15.167	long thin-tailed
MAOA-LOC09	Africa	ERR299455	Morocco	Morocco	MAOA	Ovis aries	12.932	long thin-tailed
MAOA-LOC10	Africa	ERR299461	Morocco	Morocco	MAOA	Ovis aries	12.814	long thin-tailed
MAOA-OLD01	Africa	ERR299280	Morocco	Morocco	MAOA	Ovis aries	11.112	long thin-tailed
MAOA-OLD02	Africa	ERR299284	Morocco	Morocco	MAOA	Ovis aries	13.841	long thin-tailed
MAOA-SAD01	Africa	ERR234307	Morocco	Morocco	MAOA	Ovis aries	14.693	long thin-tailed
MAOA-SAD02	Africa	ERR266271	Morocco	Morocco	MAOA	Ovis aries	13.913	long thin-tailed
MAOA-TIM01	Africa	ERR234302	Morocco	Morocco	MAOA	Ovis aries	13.851	long thin-tailed
MAOA-TIM02	Africa	ERR234303	Morocco	Morocco	MAOA	Ovis aries	15.972	long thin-tailed
AOOA-AWD02	Africa	SRR501892	Dorper	Dorper	CND	Ovis aries	11.907	-
AOOA-AWD03	Africa	SRR501891	Dorper	Dorper	CND	Ovis aries	12.296	-
CNOA-CND01	Africa	SRR11657523	Dorper	Dorper	CND	Ovis aries	24.822	-
CNOA-CND02	Africa	SRR11657524	Dorper	Dorper	CND	Ovis aries	24.078	-
CNOA-CND03	Africa	SRR11657525	Dorper	Dorper	CND	Ovis aries	25.564	-
CNOA-CND04	Africa	SRR11657526	Dorper	Dorper	CND	Ovis aries	23.991	-
CNOA-CND05	Africa	SRR11657527	Dorper	Dorper	CND	Ovis aries	24.974	-
CNOA-CND06	Africa	SRR11657528	Dorper	Dorper	CND	Ovis aries	24.468	-
CNOA-CND07	Africa	SRR11657611	Dorper	Dorper	CND	Ovis aries	23.791	-
CNOA-CND08	Africa	SRR11657612	Dorper	Dorper	CND	Ovis aries	23.878	-
CNOA-CND09	Africa	SRR11657613	Dorper	Dorper	CND	Ovis aries	25.711	-
CNOA-CND10	Africa	SRR11657614	Dorper	Dorper	CND	Ovis aries	23.405	-
Wdu2	Africa	SRR17188173	Dorper	Dorper	CND	Ovis aries	24.465	-
AOOA-AWD01	Africa	unpublished	Dorper	Dorper	CND	Ovis aries	10.599	-
CNOA-ALT07	East Asia	unpublished	Altay	Altay	ALT	Ovis aries	27.899	fat-rumped
CNOA-ALT104	East Asia	SRR11657487	Altay	Altay	ALT	Ovis aries	25.052	fat-rumped
CNOA-ALT105	East Asia	SRR11657488	Altay	Altay	ALT	Ovis aries	22.703	fat-rumped
CNOA-ALT106	East Asia	SRR11657489	Altay	Altay	ALT	Ovis aries	23.174	fat-rumped
CNOA-ALT107	East Asia	SRR11657490	Altay	Altay	ALT	Ovis aries	23.185	fat-rumped
CNOA-ALT108	East Asia	SRR11657491	Altay	Altay	ALT	Ovis aries	22.761	fat-rumped
CNOA-ALT109	East Asia	SRR11657492	Altay	Altay	ALT	Ovis aries	23.478	fat-rumped
CNOA-ALT110	East Asia	SRR11657493	Altay	Altay	ALT	Ovis aries	23.847	fat-rumped
CNOA-ALT111	East Asia	SRR11657494	Altay	Altay	ALT	Ovis aries	27.609	fat-rumped
CNOA-ALT112	East Asia	SRR11657495	Altay	Altay	ALT	Ovis aries	25.125	fat-rumped
CNOA-ALT113	East Asia	SRR11657496	Altay	Altay	ALT	Ovis aries	23.804	fat-rumped
CNOA-ALT12	East Asia	unpublished	Altay	Altay	ALT	Ovis aries	23.315	fat-rumped
CNOA-ALT14	East Asia	unpublished	Altay	Altay	ALT	Ovis aries	10.619	fat-rumped
CNOA-ALT15	East Asia	unpublished	Altay	Altay	ALT	Ovis aries	9.9877	fat-rumped
CNOA-ALT16	East Asia	unpublished	Altay	Altay	ALT	Ovis aries	10.875	fat-rumped
CNOA-ALT17	East Asia	unpublished	Altay	Altay	ALT	Ovis aries	9.9978	fat-rumped
CNOA-ALT18	East Asia	unpublished	Altay	Altay	ALT	Ovis aries	10.972	fat-rumped
CNOA-ALT19	East Asia	unpublished	Altay	Altay	ALT	Ovis aries	8.2607	fat-rumped
CNOA-ALT20	East Asia	unpublished	Altay	Altay	ALT	Ovis aries	9.995	fat-rumped
CNOA-ALT21	East Asia	unpublished	Altay	Altay	ALT	Ovis aries	9.9918	fat-rumped
CNOA-ALT23	East Asia	unpublished	Altay	Altay	ALT	Ovis aries	9.9898	fat-rumped
CNOA-ALT24	East Asia	unpublished	Altay	Altay	ALT	Ovis aries	10.478	fat-rumped
CNOA-ALT25	East Asia	unpublished	Altay	Altay	ALT	Ovis aries	8.4095	fat-rumped
CNOA-ALT26	East Asia	unpublished	Altay	Altay	ALT	Ovis aries	22.963	fat-rumped
CNOA-ALT27	East Asia	unpublished	Altay	Altay	ALT	Ovis aries	7.4792	fat-rumped
CNOA-ALT29	East Asia	unpublished	Altay	Altay	ALT	Ovis aries	31.936	fat-rumped
CNOA-BSB03	East Asia	unpublished	Bashibai	Bashibai	BSB	Ovis aries	10.856	fat-rumped
CNOA-BSB09	East Asia	unpublished	Bashibai	Bashibai	BSB	Ovis aries	11.996	fat-rumped
CNOA-BSB10	East Asia	unpublished	Bashibai	Bashibai	BSB	Ovis aries	10.007	fat-rumped
CNOA-BSB100	East Asia	SRR11657498	Bashibai	Bashibai	BSB	Ovis aries	23.801	fat-rumped
CNOA-BSB101	East Asia	SRR11657530	Bashibai	Bashibai	BSB	Ovis aries	23.776	fat-rumped
CNOA-BSB102	East Asia	SRR11657531	Bashibai	Bashibai	BSB	Ovis aries	25.906	fat-rumped
CNOA-BSB103	East Asia	SRR11657532	Bashibai	Bashibai	BSB	Ovis aries	24.025	fat-rumped
CNOA-BSB104	East Asia	SRR11657533	Bashibai	Bashibai	BSB	Ovis aries	25.813	fat-rumped
CNOA-BSB105	East Asia	SRR11657534	Bashibai	Bashibai	BSB	Ovis aries	23.78	fat-rumped
CNOA-BSB106	East Asia	SRR11657607	Bashibai	Bashibai	BSB	Ovis aries	23.81	fat-rumped
CNOA-BSB107	East Asia	SRR11657608	Bashibai	Bashibai	BSB	Ovis aries	25.94	fat-rumped
CNOA-BSB108	East Asia	SRR11657609	Bashibai	Bashibai	BSB	Ovis aries	24.828	fat-rumped
CNOA-BSB109	East Asia	SRR11657610	Bashibai	Bashibai	BSB	Ovis aries	24.781	fat-rumped
CNOA-BSB11	East Asia	unpublished	Bashibai	Bashibai	BSB	Ovis aries	9.0006	fat-rumped
CNOA-BSB13	East Asia	unpublished	Bashibai	Bashibai	BSB	Ovis aries	8.5972	fat-rumped
CNOA-BSB14	East Asia	unpublished	Bashibai	Bashibai	BSB	Ovis aries	9.9718	fat-rumped
CNOA-BSB15	East Asia	unpublished	Bashibai	Bashibai	BSB	Ovis aries	8.994	fat-rumped
CNOA-BSB16	East Asia	unpublished	Bashibai	Bashibai	BSB	Ovis aries	9.2158	fat-rumped
CNOA-BSB17	East Asia	unpublished	Bashibai	Bashibai	BSB	Ovis aries	9.0284	fat-rumped
CNOA-BSB18	East Asia	unpublished	Bashibai	Bashibai	BSB	Ovis aries	8.9913	fat-rumped
CNOA-BSB19	East Asia	unpublished	Bashibai	Bashibai	BSB	Ovis aries	8.9794	fat-rumped
CNOA-BSB20	East Asia	unpublished	Bashibai	Bashibai	BSB	Ovis aries	10.011	fat-rumped
CNOA-BYK06	East Asia	unpublished	Bayinbuluke	Bayinbuluke	BYK	Ovis aries	11.994	fat-rumped
CNOA-BYK100	East Asia	CRR053782	Bayinbuluke	Bayinbuluke	BYK	Ovis aries	5.1329	fat-rumped
CNOA-BYK103	East Asia	CRR053473	Bayinbuluke	Bayinbuluke	BYK	Ovis aries	7.8368	fat-rumped
CNOA-BYK11	East Asia	unpublished	Bayinbuluke	Bayinbuluke	BYK	Ovis aries	9.0058	fat-rumped
CNOA-BYK12	East Asia	unpublished	Bayinbuluke	Bayinbuluke	BYK	Ovis aries	9.9956	fat-rumped
CNOA-BYK13	East Asia	unpublished	Bayinbuluke	Bayinbuluke	BYK	Ovis aries	9.1697	fat-rumped
CNOA-BYK14	East Asia	unpublished	Bayinbuluke	Bayinbuluke	BYK	Ovis aries	10.003	fat-rumped
CNOA-BYK15	East Asia	unpublished	Bayinbuluke	Bayinbuluke	BYK	Ovis aries	10.241	fat-rumped
CNOA-BYK16	East Asia	unpublished	Bayinbuluke	Bayinbuluke	BYK	Ovis aries	9.9961	fat-rumped
CNOA-BYK17	East Asia	unpublished	Bayinbuluke	Bayinbuluke	BYK	Ovis aries	10.025	fat-rumped
CNOA-BYK18	East Asia	unpublished	Bayinbuluke	Bayinbuluke	BYK	Ovis aries	9.9977	fat-rumped
CNOA-BYK19	East Asia	unpublished	Bayinbuluke	Bayinbuluke	BYK	Ovis aries	9.9681	fat-rumped
CNOA-BYK20	East Asia	unpublished	Bayinbuluke	Bayinbuluke	BYK	Ovis aries	9.0806	fat-rumped
CNOA-BYK26	East Asia	SRR2976708	Bayinbuluke	Bayinbuluke	BYK	Ovis aries	6.0094	fat-rumped
CNOA-BYK28	East Asia	SRR2976713,SRR2976721	Bayinbuluke	Bayinbuluke	BYK	Ovis aries	9.877	fat-rumped
CNOA-CLB03	East Asia	unpublished	Cele Black	Cele Black	CLB	Ovis aries	9.2388	short fat-tailed
CNOA-CLB100	East Asia	SRR11657565	Cele Black	Cele Black	CLB	Ovis aries	25.077	short fat-tailed
CNOA-CLB101	East Asia	SRR11657566	Cele Black	Cele Black	CLB	Ovis aries	24.866	short fat-tailed
CNOA-CLB102	East Asia	SRR11657567	Cele Black	Cele Black	CLB	Ovis aries	25.106	short fat-tailed
CNOA-CLB103	East Asia	SRR11657568	Cele Black	Cele Black	CLB	Ovis aries	27.381	short fat-tailed
CNOA-CLB104	East Asia	SRR11657569	Cele Black	Cele Black	CLB	Ovis aries	26.741	short fat-tailed
CNOA-CLB105	East Asia	SRR11657571	Cele Black	Cele Black	CLB	Ovis aries	25.056	short fat-tailed
CNOA-CLB106	East Asia	SRR11657643	Cele Black	Cele Black	CLB	Ovis aries	24.497	short fat-tailed
CNOA-CLB107	East Asia	SRR11657644	Cele Black	Cele Black	CLB	Ovis aries	24.776	short fat-tailed
CNOA-CLB108	East Asia	SRR11657645	Cele Black	Cele Black	CLB	Ovis aries	25.01	short fat-tailed
CNOA-CLB109	East Asia	SRR11657646	Cele Black	Cele Black	CLB	Ovis aries	24.818	short fat-tailed
CNOA-CLB11	East Asia	unpublished	Cele Black	Cele Black	CLB	Ovis aries	11.162	short fat-tailed
CNOA-CLB12	East Asia	unpublished	Cele Black	Cele Black	CLB	Ovis aries	10.009	short fat-tailed
CNOA-CLB13	East Asia	unpublished	Cele Black	Cele Black	CLB	Ovis aries	11.116	short fat-tailed
CNOA-CLB14	East Asia	unpublished	Cele Black	Cele Black	CLB	Ovis aries	10.918	short fat-tailed
CNOA-CLB15	East Asia	unpublished	Cele Black	Cele Black	CLB	Ovis aries	13.043	short fat-tailed
CNOA-CLB16	East Asia	unpublished	Cele Black	Cele Black	CLB	Ovis aries	10.73	short fat-tailed
CNOA-CLB17	East Asia	unpublished	Cele Black	Cele Black	CLB	Ovis aries	9.9988	short fat-tailed
CNOA-CLB18	East Asia	unpublished	Cele Black	Cele Black	CLB	Ovis aries	10.539	short fat-tailed
CNOA-CLB19	East Asia	unpublished	Cele Black	Cele Black	CLB	Ovis aries	9.2228	short fat-tailed
CNOA-CLB20	East Asia	unpublished	Cele Black	Cele Black	CLB	Ovis aries	9.1013	short fat-tailed
CNOA-CLB26	East Asia	SRR2984616	Cele Black	Cele Black	CLB	Ovis aries	5.9901	short fat-tailed
CNOA-CLB27	East Asia	SRR2984617,SRR2984618,SRR2984619	Cele Black	Cele Black	CLB	Ovis aries	5.9755	short fat-tailed
CNOA-CLB28	East Asia	SRR2984620,SRR2984621,SRR2984622	Cele Black	Cele Black	CLB	Ovis aries	5.9507	short fat-tailed
CNOA-CLB30	East Asia	SRR2992575	Cele Black	Cele Black	CLB	Ovis aries	6.7593	short fat-tailed
CNOA-DUL100	East Asia	SRR11657554	Duolang	Duolang	DUL	Ovis aries	25.213	short fat-tailed
CNOA-DUL101	East Asia	SRR11657555	Duolang	Duolang	DUL	Ovis aries	27.218	short fat-tailed
CNOA-DUL102	East Asia	SRR11657556	Duolang	Duolang	DUL	Ovis aries	24.164	short fat-tailed
CNOA-DUL103	East Asia	SRR11657557	Duolang	Duolang	DUL	Ovis aries	24.737	short fat-tailed
CNOA-DUL104	East Asia	SRR11657558	Duolang	Duolang	DUL	Ovis aries	27.143	short fat-tailed
CNOA-DUL105	East Asia	SRR11657559	Duolang	Duolang	DUL	Ovis aries	30.992	short fat-tailed
CNOA-DUL106	East Asia	SRR11657560	Duolang	Duolang	DUL	Ovis aries	30.115	short fat-tailed
CNOA-DUL107	East Asia	SRR11657561	Duolang	Duolang	DUL	Ovis aries	30.438	short fat-tailed
CNOA-DUL108	East Asia	SRR11657562	Duolang	Duolang	DUL	Ovis aries	27.845	short fat-tailed
CNOA-DUL109	East Asia	SRR11657563	Duolang	Duolang	DUL	Ovis aries	26.549	short fat-tailed
CNOA-DUL15	East Asia	unpublished	Duolang	Duolang	DUL	Ovis aries	9.9629	short fat-tailed
CNOA-DUL16	East Asia	unpublished	Duolang	Duolang	DUL	Ovis aries	9.2031	short fat-tailed
CNOA-DUL17	East Asia	unpublished	Duolang	Duolang	DUL	Ovis aries	9.3339	short fat-tailed
CNOA-DUL18	East Asia	unpublished	Duolang	Duolang	DUL	Ovis aries	8.9165	short fat-tailed
CNOA-DUL19	East Asia	unpublished	Duolang	Duolang	DUL	Ovis aries	8.9809	short fat-tailed
CNOA-DUL20	East Asia	unpublished	Duolang	Duolang	DUL	Ovis aries	8.9901	short fat-tailed
CNOA-DUL21	East Asia	unpublished	Duolang	Duolang	DUL	Ovis aries	9.6232	short fat-tailed
CNOA-DUL22	East Asia	unpublished	Duolang	Duolang	DUL	Ovis aries	10.1	short fat-tailed
CNOA-DUL23	East Asia	unpublished	Duolang	Duolang	DUL	Ovis aries	11.554	short fat-tailed
CNOA-DUL24	East Asia	unpublished	Duolang	Duolang	DUL	Ovis aries	10.992	short fat-tailed
CNOA-DUL25	East Asia	unpublished	Duolang	Duolang	DUL	Ovis aries	8.7629	short fat-tailed
CNOA-DUL26	East Asia	unpublished	Duolang	Duolang	DUL	Ovis aries	26.305	short fat-tailed
CNOA-HUS06	East Asia	SRR3036477	Hu	Hu	HUS	Ovis aries	6.4079	short fat-tailed
CNOA-HUS07	East Asia	SRR3036494,SRR3036495	Hu	Hu	HUS	Ovis aries	5.7439	short fat-tailed
CNOA-HUS08	East Asia	SRR3036496	Hu	Hu	HUS	Ovis aries	5.9279	short fat-tailed
CNOA-HUS09	East Asia	SRR3043125	Hu	Hu	HUS	Ovis aries	6.1132	short fat-tailed
CNOA-HUS10	East Asia	SRR3043352	Hu	Hu	HUS	Ovis aries	5.9669	short fat-tailed
CNOA-HUS106	East Asia	CRR053495	Hu	Hu	HUS	Ovis aries	5.9747	short fat-tailed
CNOA-HUS109	East Asia	SRR11657579	Hu	Hu	HUS	Ovis aries	26.673	short fat-tailed
CNOA-HUS110	East Asia	SRR11657580	Hu	Hu	HUS	Ovis aries	26.05	short fat-tailed
CNOA-HUS111	East Asia	SRR11657581	Hu	Hu	HUS	Ovis aries	26.789	short fat-tailed
CNOA-HUS112	East Asia	SRR11657582	Hu	Hu	HUS	Ovis aries	27.212	short fat-tailed
CNOA-HUS113	East Asia	SRR11657583	Hu	Hu	HUS	Ovis aries	27.801	short fat-tailed
CNOA-HUS114	East Asia	SRR11657683	Hu	Hu	HUS	Ovis aries	23.65	short fat-tailed
CNOA-HUS115	East Asia	SRR11657684	Hu	Hu	HUS	Ovis aries	23.404	short fat-tailed
CNOA-HUS116	East Asia	SRR11657685	Hu	Hu	HUS	Ovis aries	22.622	short fat-tailed
CNOA-HUS117	East Asia	SRR11657686	Hu	Hu	HUS	Ovis aries	23.387	short fat-tailed
CNOA-HUS118	East Asia	SRR11657687	Hu	Hu	HUS	Ovis aries	23.609	short fat-tailed
CNOA-HUS201	East Asia	unpublished	Hu	Hu	HUS	Ovis aries	10.986	short fat-tailed
CNOA-HUS202	East Asia	unpublished	Hu	Hu	HUS	Ovis aries	10.971	short fat-tailed
CNOA-HUS203	East Asia	unpublished	Hu	Hu	HUS	Ovis aries	10.971	short fat-tailed
CNOA-HUS204	East Asia	unpublished	Hu	Hu	HUS	Ovis aries	11.044	short fat-tailed
CNOA-HUS205	East Asia	unpublished	Hu	Hu	HUS	Ovis aries	10.983	short fat-tailed
CNOA-HUS206	East Asia	unpublished	Hu	Hu	HUS	Ovis aries	10.998	short fat-tailed
CNOA-HUS207	East Asia	unpublished	Hu	Hu	HUS	Ovis aries	10.995	short fat-tailed
CNOA-HUS208	East Asia	unpublished	Hu	Hu	HUS	Ovis aries	10.991	short fat-tailed
CNOA-HUS209	East Asia	unpublished	Hu	Hu	HUS	Ovis aries	11.031	short fat-tailed
CNOA-HUS210	East Asia	unpublished	Hu	Hu	HUS	Ovis aries	10.837	short fat-tailed
CNOA-HUS211	East Asia	unpublished	Hu	Hu	HUS	Ovis aries	11	short fat-tailed
CNOA-HUS212	East Asia	unpublished	Hu	Hu	HUS	Ovis aries	10.995	short fat-tailed
CNOA-HUS213	East Asia	unpublished	Hu	Hu	HUS	Ovis aries	10.983	short fat-tailed
CNOA-HUS214	East Asia	unpublished	Hu	Hu	HUS	Ovis aries	10.996	short fat-tailed
CNOA-HUS215	East Asia	unpublished	Hu	Hu	HUS	Ovis aries	10.987	short fat-tailed
CNOA-HUS216	East Asia	unpublished	Hu	Hu	HUS	Ovis aries	10.957	short fat-tailed
CNOA-HUS217	East Asia	unpublished	Hu	Hu	HUS	Ovis aries	11.015	short fat-tailed
CNOA-HUS218	East Asia	unpublished	Hu	Hu	HUS	Ovis aries	10.994	short fat-tailed
CNOA-HUS219	East Asia	unpublished	Hu	Hu	HUS	Ovis aries	10.64	short fat-tailed
CNOA-HUS220	East Asia	unpublished	Hu	Hu	HUS	Ovis aries	10.991	short fat-tailed
CNOA-HUS250	East Asia	unpublished	Hu	Hu	HUS	Ovis aries	38.758	short fat-tailed
CNOA-HUS251	East Asia	unpublished	Hu	Hu	HUS	Ovis aries	42.688	short fat-tailed
CNOA-HUS252	East Asia	unpublished	Hu	Hu	HUS	Ovis aries	39.555	short fat-tailed
CNOA-HUS253	East Asia	unpublished	Hu	Hu	HUS	Ovis aries	37.512	short fat-tailed
CNOA-HUS254	East Asia	unpublished	Hu	Hu	HUS	Ovis aries	40.359	short fat-tailed
CNOA-HUS255	East Asia	unpublished	Hu	Hu	HUS	Ovis aries	38.166	short fat-tailed
CNOA-HUS256	East Asia	unpublished	Hu	Hu	HUS	Ovis aries	37.551	short fat-tailed
CNOA-HUS257	East Asia	unpublished	Hu	Hu	HUS	Ovis aries	41.261	short fat-tailed
CNOA-HUS258	East Asia	unpublished	Hu	Hu	HUS	Ovis aries	11.991	short fat-tailed
2H1-kazak	East Asia	SRR17035345	Kazakh	Kazakh	KAZ	Ovis aries	23.581	fat-rumped
CNOA-KAZ03	East Asia	CRR053487	Kazakh	Kazakh	KAZ	Ovis aries	6.7165	fat-rumped
CNOA-KAZ100	East Asia	unpublished	Kazakh	Kazakh	KAZ	Ovis aries	12.99	fat-rumped
CNOA-KAZ101	East Asia	unpublished	Kazakh	Kazakh	KAZ	Ovis aries	16.292	fat-rumped
CNOA-KAZ102	East Asia	unpublished	Kazakh	Kazakh	KAZ	Ovis aries	15.897	fat-rumped
CNOA-KAZ103	East Asia	unpublished	Kazakh	Kazakh	KAZ	Ovis aries	15.868	fat-rumped
CNOA-KAZ104	East Asia	unpublished	Kazakh	Kazakh	KAZ	Ovis aries	16.955	fat-rumped
CNOA-KAZ105	East Asia	unpublished	Kazakh	Kazakh	KAZ	Ovis aries	18.118	fat-rumped
CNOA-KAZ106	East Asia	unpublished	Kazakh	Kazakh	KAZ	Ovis aries	19.044	fat-rumped
CNOA-KAZ107	East Asia	unpublished	Kazakh	Kazakh	KAZ	Ovis aries	22.012	fat-rumped
CNOA-KAZ108	East Asia	unpublished	Kazakh	Kazakh	KAZ	Ovis aries	20.196	fat-rumped
CNOA-KAZ109	East Asia	unpublished	Kazakh	Kazakh	KAZ	Ovis aries	20.212	fat-rumped
CNOA-KAZ110	East Asia	unpublished	Kazakh	Kazakh	KAZ	Ovis aries	18.121	fat-rumped
CNOA-KAZ111	East Asia	unpublished	Kazakh	Kazakh	KAZ	Ovis aries	20.754	fat-rumped
CNOA-KAZ112	East Asia	unpublished	Kazakh	Kazakh	KAZ	Ovis aries	18.961	fat-rumped
CNOA-KAZ113	East Asia	unpublished	Kazakh	Kazakh	KAZ	Ovis aries	19.015	fat-rumped
CNOA-KAZ114	East Asia	unpublished	Kazakh	Kazakh	KAZ	Ovis aries	20.989	fat-rumped
KZOA-KAZ01	East Asia	SRR12397013	Kazakh	Kazakh	KAZ	Ovis aries	24.355	fat-rumped
KZOA-KAZ02	East Asia	SRR12397014	Kazakh	Kazakh	KAZ	Ovis aries	23.819	fat-rumped
CNOA-LTH04	East Asia	CRR053477	Large-tailed Han	Large-tailed Han	LTH	Ovis aries	14.096	long fat-tailed
CNOA-LTH05	East Asia	SRR11657499	Large-tailed Han	Large-tailed Han	LTH	Ovis aries	23.506	long fat-tailed
CNOA-LTH06	East Asia	SRR11657519	Large-tailed Han	Large-tailed Han	LTH	Ovis aries	22.861	long fat-tailed
CNOA-LTH07	East Asia	SRR11657520	Large-tailed Han	Large-tailed Han	LTH	Ovis aries	23.403	long fat-tailed
CNOA-LTH08	East Asia	SRR11657521	Large-tailed Han	Large-tailed Han	LTH	Ovis aries	23.253	long fat-tailed
CNOA-LTH09	East Asia	SRR11657522	Large-tailed Han	Large-tailed Han	LTH	Ovis aries	23.636	long fat-tailed
CNOA-LTH10	East Asia	SRR11657586	Large-tailed Han	Large-tailed Han	LTH	Ovis aries	24.196	long fat-tailed
CNOA-LTH11	East Asia	SRR11657588	Large-tailed Han	Large-tailed Han	LTH	Ovis aries	24.432	long fat-tailed
CNOA-LTH12	East Asia	SRR11657595	Large-tailed Han	Large-tailed Han	LTH	Ovis aries	23.927	long fat-tailed
CNOA-LTH13	East Asia	SRR11657602	Large-tailed Han	Large-tailed Han	LTH	Ovis aries	23.14	long fat-tailed
CNOA-LTH14	East Asia	SRR11657632	Large-tailed Han	Large-tailed Han	LTH	Ovis aries	21.756	long fat-tailed
MGOA-BAR01	East Asia	SRR12396979	Monglia	Monglia	MOG	Ovis aries	22.714	short fat-tailed
MGOA-BAR02	East Asia	SRR12396980	Monglia	Monglia	MOG	Ovis aries	22.068	short fat-tailed
MGOA-BYD01	East Asia	SRR12396981	Monglia	Monglia	MOG	Ovis aries	20.08	short fat-tailed
MGOA-KOT01	East Asia	SRR12396977	Monglia	Monglia	MOG	Ovis aries	21.084	short fat-tailed
MGOA-TAM01	East Asia	SRR12396978	Monglia	Monglia	MOG	Ovis aries	23.167	short fat-tailed
CNOA-OLA01	East Asia	unpublished	Oula	Oula	OLA	Ovis aries	10.122	short thin-tailed
CNOA-OLA02	East Asia	unpublished	Oula	Oula	OLA	Ovis aries	9.9933	short thin-tailed
CNOA-OLA03	East Asia	unpublished	Oula	Oula	OLA	Ovis aries	11.082	short thin-tailed
CNOA-OLA04	East Asia	unpublished	Oula	Oula	OLA	Ovis aries	12.789	short thin-tailed
CNOA-OLA05	East Asia	SRR3043353,SRR3043355	Oula	Oula	OLA	Ovis aries	5.9982	short thin-tailed
CNOA-OLA10	East Asia	SRR3054905	Oula	Oula	OLA	Ovis aries	6.159	short thin-tailed
CNOA-OLA12	East Asia	SRR3055048,SRR3055049	Oula	Oula	OLA	Ovis aries	5.9867	short thin-tailed
CNOA-OLA13	East Asia	SRR3055050	Oula	Oula	OLA	Ovis aries	5.8811	short thin-tailed
CNOA-SSS05	East Asia	SRR11657542	Sishui Fur	Sishui Fur	SSS	Ovis aries	23.832	long fat-tailed
CNOA-SSS06	East Asia	SRR11657553	Sishui Fur	Sishui Fur	SSS	Ovis aries	26.387	long fat-tailed
CNOA-SSS07	East Asia	SRR11657564	Sishui Fur	Sishui Fur	SSS	Ovis aries	26.38	long fat-tailed
CNOA-SSS08	East Asia	SRR11657647	Sishui Fur	Sishui Fur	SSS	Ovis aries	12.572	long fat-tailed
CNOA-SSS09	East Asia	SRR11657658	Sishui Fur	Sishui Fur	SSS	Ovis aries	23.597	long fat-tailed
CNOA-SSS10	East Asia	SRR11657669	Sishui Fur	Sishui Fur	SSS	Ovis aries	23.108	long fat-tailed
CNOA-SSS11	East Asia	SRR11657680	Sishui Fur	Sishui Fur	SSS	Ovis aries	23.961	long fat-tailed
CNOA-SSS12	East Asia	SRR11657697	Sishui Fur	Sishui Fur	SSS	Ovis aries	23.807	long fat-tailed
CNOA-SSS13	East Asia	SRR11657708	Sishui Fur	Sishui Fur	SSS	Ovis aries	24.101	long fat-tailed
CNOA-SSS14	East Asia	SRR11657719	Sishui Fur	Sishui Fur	SSS	Ovis aries	23.585	long fat-tailed
CNOA-STH06	East Asia	SRR3184728	Small Tail Han	Small Tail Han	STH	Ovis aries	5.8664	short fat-tailed
CNOA-STH08	East Asia	SRR3184742,SRR3184746,SRR3184747	Small Tail Han	Small Tail Han	STH	Ovis aries	5.6922	short fat-tailed
CNOA-STH104	East Asia	SRR11657475	Small Tail Han	Small Tail Han	STH	Ovis aries	29.992	short fat-tailed
CNOA-STH105	East Asia	SRR11657486	Small Tail Han	Small Tail Han	STH	Ovis aries	29.012	short fat-tailed
CNOA-STH106	East Asia	SRR11657497	Small Tail Han	Small Tail Han	STH	Ovis aries	26.638	short fat-tailed
CNOA-STH107	East Asia	SRR11657529	Small Tail Han	Small Tail Han	STH	Ovis aries	29.796	short fat-tailed
CNOA-STH108	East Asia	SRR11657572	Small Tail Han	Small Tail Han	STH	Ovis aries	27.919	short fat-tailed
CNOA-STH109	East Asia	SRR11657578	Small Tail Han	Small Tail Han	STH	Ovis aries	28.806	short fat-tailed
CNOA-STH110	East Asia	SRR11657584	Small Tail Han	Small Tail Han	STH	Ovis aries	28.753	short fat-tailed
CNOA-STH111	East Asia	SRR11657603	Small Tail Han	Small Tail Han	STH	Ovis aries	28.759	short fat-tailed
CNOA-STH112	East Asia	SRR11657681	Small Tail Han	Small Tail Han	STH	Ovis aries	29.548	short fat-tailed
CNOA-STH113	East Asia	SRR11657682	Small Tail Han	Small Tail Han	STH	Ovis aries	25.893	short fat-tailed
CNOA-TAN02	East Asia	unpublished	Tan	Tan	TAN	Ovis aries	15.714	long fat-tailed
CNOA-TAN03	East Asia	unpublished	Tan	Tan	TAN	Ovis aries	16.056	long fat-tailed
CNOA-TAN04	East Asia	unpublished	Tan	Tan	TAN	Ovis aries	16.444	long fat-tailed
CNOA-TAN05	East Asia	unpublished	Tan	Tan	TAN	Ovis aries	15.95	long fat-tailed
CNOA-TAN06	East Asia	unpublished	Tan	Tan	TAN	Ovis aries	15.659	long fat-tailed
CNOA-TAN07	East Asia	unpublished	Tan	Tan	TAN	Ovis aries	15.12	long fat-tailed
CNOA-TAN08	East Asia	unpublished	Tan	Tan	TAN	Ovis aries	15.852	long fat-tailed
CNOA-TAN107	East Asia	SRR11657463	Tan	Tan	TAN	Ovis aries	23.413	long fat-tailed
CNOA-TAN108	East Asia	SRR11657464	Tan	Tan	TAN	Ovis aries	23.952	long fat-tailed
CNOA-TAN109	East Asia	SRR11657465	Tan	Tan	TAN	Ovis aries	24.976	long fat-tailed
CNOA-TAN110	East Asia	SRR11657573	Tan	Tan	TAN	Ovis aries	24.835	long fat-tailed
CNOA-TAN111	East Asia	SRR11657574	Tan	Tan	TAN	Ovis aries	23.36	long fat-tailed
CNOA-TAN112	East Asia	SRR11657575	Tan	Tan	TAN	Ovis aries	23.793	long fat-tailed
CNOA-TAN113	East Asia	SRR11657576	Tan	Tan	TAN	Ovis aries	24.739	long fat-tailed
CNOA-TAN114	East Asia	SRR11657577	Tan	Tan	TAN	Ovis aries	23.727	long fat-tailed
CNOA-TAN115	East Asia	SRR11657688	Tan	Tan	TAN	Ovis aries	23.055	long fat-tailed
CNOA-TAN116	East Asia	SRR11657689	Tan	Tan	TAN	Ovis aries	25.194	long fat-tailed
CNOA-TAN17	East Asia	SRR3065082	Tan	Tan	TAN	Ovis aries	5.665	long fat-tailed
CNOA-TIB102	East Asia	CRR053725	Tibetan	Tibetan	TIB	Ovis aries	44.43	short thin-tailed
CNOA-TIB13	East Asia	unpublished	Tibetan	Tibetan	TIB	Ovis aries	8.9221	short thin-tailed
CNOA-TIB132	East Asia	CRR053380	Tibetan	Tibetan	TIB	Ovis aries	6.0338	short thin-tailed
CNOA-TIB133	East Asia	CRR053381	Tibetan	Tibetan	TIB	Ovis aries	6.096	short thin-tailed
CNOA-TIB134	East Asia	CRR053382	Tibetan	Tibetan	TIB	Ovis aries	6.0329	short thin-tailed
CNOA-TIB135	East Asia	CRR053383	Tibetan	Tibetan	TIB	Ovis aries	7.6664	short thin-tailed
CNOA-TIB14	East Asia	unpublished	Tibetan	Tibetan	TIB	Ovis aries	10.358	short thin-tailed
CNOA-TIB15	East Asia	unpublished	Tibetan	Tibetan	TIB	Ovis aries	8.0916	short thin-tailed
CNOA-TIB16	East Asia	unpublished	Tibetan	Tibetan	TIB	Ovis aries	9.9813	short thin-tailed
CNOA-TIB17	East Asia	unpublished	Tibetan	Tibetan	TIB	Ovis aries	8.8563	short thin-tailed
CNOA-TIB170	East Asia	CRR053422	Tibetan	Tibetan	TIB	Ovis aries	6.5329	short thin-tailed
CNOA-TIB171	East Asia	CRR053423	Tibetan	Tibetan	TIB	Ovis aries	4.9891	short thin-tailed
CNOA-TIB173	East Asia	CRR053429	Tibetan	Tibetan	TIB	Ovis aries	6.1379	short thin-tailed
CNOA-TIB174	East Asia	CRR053430	Tibetan	Tibetan	TIB	Ovis aries	6.9774	short thin-tailed
CNOA-TIB200	East Asia	SRR12397002	Tibetan	Tibetan	TIB	Ovis aries	23.16	short thin-tailed
CNOA-TIB201	East Asia	SRR12397003	Tibetan	Tibetan	TIB	Ovis aries	21.722	short thin-tailed
CNOA-TIB202	East Asia	SRR12397005	Tibetan	Tibetan	TIB	Ovis aries	21.911	short thin-tailed
CNOA-TIB203	East Asia	SRR12397006	Tibetan	Tibetan	TIB	Ovis aries	23.444	short thin-tailed
CNOA-TIB204	East Asia	SRR12397007	Tibetan	Tibetan	TIB	Ovis aries	25.478	short thin-tailed
CNOA-TIB205	East Asia	SRR12397008	Tibetan	Tibetan	TIB	Ovis aries	23.957	short thin-tailed
CNOA-TIB206	East Asia	SRR12397009	Tibetan	Tibetan	TIB	Ovis aries	22.071	short thin-tailed
CNOA-TIB207	East Asia	SRR12397010	Tibetan	Tibetan	TIB	Ovis aries	23.001	short thin-tailed
CNOA-TIB208	East Asia	SRR12397011	Tibetan	Tibetan	TIB	Ovis aries	21.624	short thin-tailed
CNOA-TIB22	East Asia	SRR501845	Tibetan	Tibetan	TIB	Ovis aries	9.4909	short thin-tailed
CNOA-TIB24	East Asia	SRR501894	Tibetan	Tibetan	TIB	Ovis aries	12.778	short thin-tailed
qiaoke	East Asia	SRR17155231	Tibetan	Tibetan	TIB	Ovis aries	21.87	short thin-tailed
CNOA-UJM01	East Asia	SRR12396982	Ujumqin	Ujumqin	UJM	Ovis aries	26.557	short fat-tailed
CNOA-UJM02	East Asia	SRR12396983	Ujumqin	Ujumqin	UJM	Ovis aries	26.421	short fat-tailed
CNOA-WZM01	East Asia	SRR3068438	Ujumqin	Ujumqin	UJM	Ovis aries	5.9871	short fat-tailed
CNOA-WZM02	East Asia	SRR3068457	Ujumqin	Ujumqin	UJM	Ovis aries	5.9114	short fat-tailed
CNOA-WZM03	East Asia	SRR3068467	Ujumqin	Ujumqin	UJM	Ovis aries	5.778	short fat-tailed
CNOA-WZM04	East Asia	SRR3068471	Ujumqin	Ujumqin	UJM	Ovis aries	5.9822	short fat-tailed
CNOA-WZM05	East Asia	SRR3068478	Ujumqin	Ujumqin	UJM	Ovis aries	5.9734	short fat-tailed
CNOA-WZM06	East Asia	SRR3087354	Ujumqin	Ujumqin	UJM	Ovis aries	5.7358	short fat-tailed
CNOA-WZM07	East Asia	SRR3087367,SRR3087371	Ujumqin	Ujumqin	UJM	Ovis aries	8.8049	short fat-tailed
CNOA-WZM08	East Asia	SRR3087377	Ujumqin	Ujumqin	UJM	Ovis aries	5.9516	short fat-tailed
CNOA-WZM10	East Asia	SRR3087385,SRR3087388	Ujumqin	Ujumqin	UJM	Ovis aries	5.1401	short fat-tailed
Ujumqin	East Asia	SRR17188203	Ujumqin	Ujumqin	UJM	Ovis aries	23.464	short fat-tailed
CNOA-WDS07	East Asia	CRR053530	Wadi	Wadi	WDS	Ovis aries	5.7408	short fat-tailed
CNOA-WDS08	East Asia	CRR053531	Wadi	Wadi	WDS	Ovis aries	7.0243	short fat-tailed
CNOA-WDS09	East Asia	CRR053532	Wadi	Wadi	WDS	Ovis aries	5.8064	short fat-tailed
CNOA-WDS10	East Asia	SRR11657466	Wadi	Wadi	WDS	Ovis aries	35.123	short fat-tailed
CNOA-WDS11	East Asia	SRR11657467	Wadi	Wadi	WDS	Ovis aries	30.842	short fat-tailed
CNOA-WDS12	East Asia	SRR11657468	Wadi	Wadi	WDS	Ovis aries	31.01	short fat-tailed
CNOA-WDS13	East Asia	SRR11657469	Wadi	Wadi	WDS	Ovis aries	31.328	short fat-tailed
CNOA-WDS14	East Asia	SRR11657470	Wadi	Wadi	WDS	Ovis aries	29.4	short fat-tailed
CNOA-WDS15	East Asia	SRR11657471	Wadi	Wadi	WDS	Ovis aries	34.865	short fat-tailed
CNOA-WDS16	East Asia	SRR11657472	Wadi	Wadi	WDS	Ovis aries	36.382	short fat-tailed
CNOA-WDS18	East Asia	SRR11657474	Wadi	Wadi	WDS	Ovis aries	30.274	short fat-tailed
CNOA-WDS19	East Asia	SRR11657570	Wadi	Wadi	WDS	Ovis aries	35.224	short fat-tailed
CNOA-WDS20	East Asia	SRR12396939	Wadi	Wadi	WDS	Ovis aries	42.101	short fat-tailed
CNOA-WAG01	East Asia	SRR11657594	Waggir	Waggir	WAG	Ovis aries	30.206	short fat-tailed
CNOA-WAG02	East Asia	SRR11657596	Waggir	Waggir	WAG	Ovis aries	29.009	short fat-tailed
CNOA-WAG03	East Asia	SRR11657597	Waggir	Waggir	WAG	Ovis aries	31.038	short fat-tailed
CNOA-WAG04	East Asia	SRR11657598	Waggir	Waggir	WAG	Ovis aries	27.446	short fat-tailed
CNOA-WAG05	East Asia	SRR11657599	Waggir	Waggir	WAG	Ovis aries	29.146	short fat-tailed
CNOA-WAG06	East Asia	SRR11657615	Waggir	Waggir	WAG	Ovis aries	25.408	short fat-tailed
CNOA-WAG07	East Asia	SRR11657616	Waggir	Waggir	WAG	Ovis aries	27.431	short fat-tailed
CNOA-WAG08	East Asia	SRR11657617	Waggir	Waggir	WAG	Ovis aries	29.246	short fat-tailed
CNOA-WAG09	East Asia	SRR11657618	Waggir	Waggir	WAG	Ovis aries	31.121	short fat-tailed
CNOA-WAG10	East Asia	SRR11657619	Waggir	Waggir	WAG	Ovis aries	28.264	short fat-tailed
CNOA-DQS06	East Asia	CRR053448	Yunnan	Yunnan	YBB	Ovis aries	5.9774	short thin-tailed
CNOA-DQS07	East Asia	CRR053449	Yunnan	Yunnan	YBB	Ovis aries	6.5102	short thin-tailed
CNOA-DQS08	East Asia	CRR053450	Yunnan	Yunnan	YBB	Ovis aries	6.0157	short thin-tailed
CNOA-DQS09	East Asia	CRR053451	Yunnan	Yunnan	YBB	Ovis aries	7.0528	short thin-tailed
CNOA-SPS08	East Asia	CRR053454	Yunnan	Yunnan	YBB	Ovis aries	6.1965	short thin-tailed
CNOA-SPS09	East Asia	CRR053455	Yunnan	Yunnan	YBB	Ovis aries	5.7271	short thin-tailed
CNOA-TCS20	East Asia	SRR12396999	Yunnan	Yunnan	YBB	Ovis aries	22.826	short thin-tailed
CNOA-TCS21	East Asia	SRR12397000	Yunnan	Yunnan	YBB	Ovis aries	23.175	short thin-tailed
CNOA-TCS22	East Asia	SRR12397001	Yunnan	Yunnan	YBB	Ovis aries	17.447	short thin-tailed
CNOA-WNS07	East Asia	CRR053461	Yunnan	Yunnan	YBB	Ovis aries	7.1147	long thin-tailed
CNOA-WNS08	East Asia	CRR053462	Yunnan	Yunnan	YBB	Ovis aries	5.73	long thin-tailed
CNOA-WNS09	East Asia	CRR053463	Yunnan	Yunnan	YBB	Ovis aries	5.7717	long thin-tailed
CNOA-YBB100	East Asia	unpublished	Yunnan	Yunnan	YBB	Ovis aries	10.068	short thin-tailed
CNOA-YBB31	East Asia	unpublished	Yunnan	Yunnan	YBB	Ovis aries	9.5652	short thin-tailed
CNOA-YBB32	East Asia	unpublished	Yunnan	Yunnan	YBB	Ovis aries	9.4409	short thin-tailed
CNOA-YBB34	East Asia	unpublished	Yunnan	Yunnan	YBB	Ovis aries	9.969	short thin-tailed
CNOA-YBB35	East Asia	unpublished	Yunnan	Yunnan	YBB	Ovis aries	10.435	short thin-tailed
CNOA-YBB38	East Asia	unpublished	Yunnan	Yunnan	YBB	Ovis aries	10.694	short thin-tailed
CNOA-YBB44	East Asia	unpublished	Yunnan	Yunnan	YBB	Ovis aries	10.163	short thin-tailed
CNOA-YBB51	East Asia	unpublished	Yunnan	Yunnan	YBB	Ovis aries	10.642	short thin-tailed
CNOA-YBB52	East Asia	unpublished	Yunnan	Yunnan	YBB	Ovis aries	11	short thin-tailed
CNOA-YBB59	East Asia	unpublished	Yunnan	Yunnan	YBB	Ovis aries	10.994	short thin-tailed
CNOA-YBB60	East Asia	unpublished	Yunnan	Yunnan	YBB	Ovis aries	10.939	short thin-tailed
CNOA-YBB61	East Asia	unpublished	Yunnan	Yunnan	YBB	Ovis aries	10.166	short thin-tailed
CNOA-YBB63	East Asia	unpublished	Yunnan	Yunnan	YBB	Ovis aries	10.984	short thin-tailed
CNOA-YBB76	East Asia	unpublished	Yunnan	Yunnan	YBB	Ovis aries	11.022	short thin-tailed
CNOA-YBB78	East Asia	unpublished	Yunnan	Yunnan	YBB	Ovis aries	12.93	short thin-tailed
CNOA-YBB84	East Asia	unpublished	Yunnan	Yunnan	YBB	Ovis aries	10.914	short thin-tailed
CNOA-YBB85	East Asia	unpublished	Yunnan	Yunnan	YBB	Ovis aries	11.997	short thin-tailed
CNOA-YBB86	East Asia	unpublished	Yunnan	Yunnan	YBB	Ovis aries	12.335	short thin-tailed
CNOA-YBB95	East Asia	unpublished	Yunnan	Yunnan	YBB	Ovis aries	11.076	short thin-tailed
CNOA-YBB99	East Asia	unpublished	Yunnan	Yunnan	YBB	Ovis aries	10.312	short thin-tailed
YN3	East Asia	SRR17138953	Yunnan	Yunnan	YBB	Ovis aries	22.111	short thin-tailed
AUOA-AUM06	Europe	SRR2973610,SRR2973611	Australian Merino	Australian Merino	AUM	Ovis aries	6.5771	long thin-tailed
AUOA-AUM07	Europe	SRR2973635	Australian Merino	Australian Merino	AUM	Ovis aries	5.4723	long thin-tailed
AUOA-AUM08	Europe	SRR2976378,SRR2976379	Australian Merino	Australian Merino	AUM	Ovis aries	5.8629	long thin-tailed
AUOA-AUM09	Europe	SRR2976380-SRR2976381	Australian Merino	Australian Merino	AUM	Ovis aries	5.7033	long thin-tailed
AUOA-AUM10	Europe	SRR2976383,SRR2976384,SRR2976386,SRR2976387,SRR2976388	Australian Merino	Australian Merino	AUM	Ovis aries	5.9961	long thin-tailed
CNOA-CNM100	Europe	SRR11657670	Chinese Merino	Chinese Merino	CNM	Ovis aries	27.52	long thin-tailed
CNOA-CNM101	Europe	SRR11657671	Chinese Merino	Chinese Merino	CNM	Ovis aries	30.461	long thin-tailed
CNOA-CNM102	Europe	SRR11657672	Chinese Merino	Chinese Merino	CNM	Ovis aries	30.332	long thin-tailed
CNOA-CNM103	Europe	SRR11657673	Chinese Merino	Chinese Merino	CNM	Ovis aries	27.14	long thin-tailed
CNOA-CNM104	Europe	SRR11657674	Chinese Merino	Chinese Merino	CNM	Ovis aries	27.603	long thin-tailed
CNOA-CNM105	Europe	SRR11657675	Chinese Merino	Chinese Merino	CNM	Ovis aries	21.748	long thin-tailed
CNOA-CNM106	Europe	SRR11657676	Chinese Merino	Chinese Merino	CNM	Ovis aries	28.775	long thin-tailed
CNOA-CNM107	Europe	SRR11657677	Chinese Merino	Chinese Merino	CNM	Ovis aries	26.124	long thin-tailed
CNOA-CNM108	Europe	SRR11657678	Chinese Merino	Chinese Merino	CNM	Ovis aries	29.004	long thin-tailed
CNOA-CNM109	Europe	SRR11657679	Chinese Merino	Chinese Merino	CNM	Ovis aries	27.745	long thin-tailed
CNOA-CNM114	Europe	SRR11657663	Chinese Merino	Chinese Merino	CNM	Ovis aries	24.886	long thin-tailed
CNOA-CNM115	Europe	SRR11657664	Chinese Merino	Chinese Merino	CNM	Ovis aries	25.619	long thin-tailed
CNOA-CNM116	Europe	SRR11657665	Chinese Merino	Chinese Merino	CNM	Ovis aries	22.448	long thin-tailed
merino	Europe	SRR17152797	Chinese Merino	Chinese Merino	CNM	Ovis aries	23.844	long thin-tailed
KLOA-DAL01	Europe	SRR12396912	Croatia	Croatia	CRO	Ovis aries	22.749	long thin-tailed
KLOA-DAL02	Europe	SRR12396913	Croatia	Croatia	CRO	Ovis aries	24.578	long thin-tailed
KLOA-DAL03	Europe	SRR12396914	Croatia	Croatia	CRO	Ovis aries	22.817	long thin-tailed
KLOA-PAG01	Europe	SRR12396860	Croatia	Croatia	CRO	Ovis aries	24.1	long thin-tailed
KLOA-PAG03	Europe	SRR12396915	Croatia	Croatia	CRO	Ovis aries	23.881	long thin-tailed
NLOA-DRH01	Europe	SRR11657600	Drente Heathen	Drente Heathen	DRH	Ovis aries	27.176	long thin-tailed
NLOA-DRH02	Europe	SRR11657601	Drente Heathen	Drente Heathen	DRH	Ovis aries	29.093	long thin-tailed
NLOA-DRH03	Europe	SRR11657604	Drente Heathen	Drente Heathen	DRH	Ovis aries	28.122	long thin-tailed
NLOA-DRH04	Europe	SRR11657605	Drente Heathen	Drente Heathen	DRH	Ovis aries	25.08	long thin-tailed
NLOA-DRH05	Europe	SRR11657606	Drente Heathen	Drente Heathen	DRH	Ovis aries	21.076	long thin-tailed
CNOA-EFR01	Europe	SRR11657476	East Friesian Dairy	East Friesian Dairy	EFR	Ovis aries	31.722	long thin-tailed
CNOA-EFR02	Europe	SRR11657477	East Friesian Dairy	East Friesian Dairy	EFR	Ovis aries	26.975	long thin-tailed
CNOA-EFR03	Europe	SRR11657478	East Friesian Dairy	East Friesian Dairy	EFR	Ovis aries	29.051	long thin-tailed
CNOA-EFR04	Europe	SRR11657479	East Friesian Dairy	East Friesian Dairy	EFR	Ovis aries	26.913	long thin-tailed
CNOA-EFR05	Europe	SRR11657480	East Friesian Dairy	East Friesian Dairy	EFR	Ovis aries	28.767	long thin-tailed
CNOA-EFR06	Europe	SRR11657481	East Friesian Dairy	East Friesian Dairy	EFR	Ovis aries	26.013	long thin-tailed
CNOA-EFR51	Europe	unpublished	East Friesian Dairy	East Friesian Dairy	EFR	Ovis aries	11.259	long thin-tailed
CNOA-EFR52	Europe	unpublished	East Friesian Dairy	East Friesian Dairy	EFR	Ovis aries	11.755	long thin-tailed
CNOA-EFR53	Europe	unpublished	East Friesian Dairy	East Friesian Dairy	EFR	Ovis aries	11.979	long thin-tailed
CNOA-EFR54	Europe	unpublished	East Friesian Dairy	East Friesian Dairy	EFR	Ovis aries	11.07	long thin-tailed
CNOA-EFR55	Europe	unpublished	East Friesian Dairy	East Friesian Dairy	EFR	Ovis aries	11.499	long thin-tailed
CNOA-EFR56	Europe	unpublished	East Friesian Dairy	East Friesian Dairy	EFR	Ovis aries	11.243	long thin-tailed
CNOA-EFR57	Europe	unpublished	East Friesian Dairy	East Friesian Dairy	EFR	Ovis aries	10.998	long thin-tailed
CNOA-EFR58	Europe	unpublished	East Friesian Dairy	East Friesian Dairy	EFR	Ovis aries	11.825	long thin-tailed
CNOA-EFR59	Europe	unpublished	East Friesian Dairy	East Friesian Dairy	EFR	Ovis aries	11.102	long thin-tailed
CNOA-EFR60	Europe	unpublished	East Friesian Dairy	East Friesian Dairy	EFR	Ovis aries	11.861	long thin-tailed
CNOA-EFR61	Europe	unpublished	East Friesian Dairy	East Friesian Dairy	EFR	Ovis aries	11.396	long thin-tailed
CNOA-EFR62	Europe	unpublished	East Friesian Dairy	East Friesian Dairy	EFR	Ovis aries	11.747	long thin-tailed
CNOA-EFR63	Europe	unpublished	East Friesian Dairy	East Friesian Dairy	EFR	Ovis aries	11.372	long thin-tailed
CNOA-EFR64	Europe	unpublished	East Friesian Dairy	East Friesian Dairy	EFR	Ovis aries	11.952	long thin-tailed
CNOA-EFR65	Europe	unpublished	East Friesian Dairy	East Friesian Dairy	EFR	Ovis aries	11.151	long thin-tailed
CNOA-EFR66	Europe	unpublished	East Friesian Dairy	East Friesian Dairy	EFR	Ovis aries	11.989	long thin-tailed
CNOA-EFR67	Europe	unpublished	East Friesian Dairy	East Friesian Dairy	EFR	Ovis aries	10.342	long thin-tailed
CNOA-EFR68	Europe	unpublished	East Friesian Dairy	East Friesian Dairy	EFR	Ovis aries	11.616	long thin-tailed
CNOA-EFR69	Europe	unpublished	East Friesian Dairy	East Friesian Dairy	EFR	Ovis aries	10.349	long thin-tailed
CNOA-EFR70	Europe	unpublished	East Friesian Dairy	East Friesian Dairy	EFR	Ovis aries	11.523	long thin-tailed
CNOA-EFR71	Europe	unpublished	East Friesian Dairy	East Friesian Dairy	EFR	Ovis aries	10.547	long thin-tailed
CNOA-EFR72	Europe	unpublished	East Friesian Dairy	East Friesian Dairy	EFR	Ovis aries	10.339	long thin-tailed
CNOA-EFR73	Europe	unpublished	East Friesian Dairy	East Friesian Dairy	EFR	Ovis aries	11.029	long thin-tailed
CNOA-EFR74	Europe	unpublished	East Friesian Dairy	East Friesian Dairy	EFR	Ovis aries	11.008	long thin-tailed
CNOA-EFR75	Europe	unpublished	East Friesian Dairy	East Friesian Dairy	EFR	Ovis aries	11.11	long thin-tailed
CNOA-EFR76	Europe	unpublished	East Friesian Dairy	East Friesian Dairy	EFR	Ovis aries	10.919	long thin-tailed
CNOA-EFR77	Europe	unpublished	East Friesian Dairy	East Friesian Dairy	EFR	Ovis aries	10.43	long thin-tailed
CNOA-EFR78	Europe	unpublished	East Friesian Dairy	East Friesian Dairy	EFR	Ovis aries	11.368	long thin-tailed
CNOA-EFR79	Europe	unpublished	East Friesian Dairy	East Friesian Dairy	EFR	Ovis aries	11.136	long thin-tailed
CNOA-EFR80	Europe	unpublished	East Friesian Dairy	East Friesian Dairy	EFR	Ovis aries	10.324	long thin-tailed
CNOA-EFR81	Europe	unpublished	East Friesian Dairy	East Friesian Dairy	EFR	Ovis aries	10.164	long thin-tailed
CNOA-EFR82	Europe	unpublished	East Friesian Dairy	East Friesian Dairy	EFR	Ovis aries	10.589	long thin-tailed
DEOA-EFR01	Europe	SRR11657482	East Friesian Dairy	East Friesian Dairy	EFR	Ovis aries	27.99	long thin-tailed
DEOA-EFR02	Europe	SRR11657483	East Friesian Dairy	East Friesian Dairy	EFR	Ovis aries	26.95	long thin-tailed
DEOA-EFR03	Europe	SRR11657484	East Friesian Dairy	East Friesian Dairy	EFR	Ovis aries	31.06	long thin-tailed
DEOA-EFR04	Europe	SRR11657485	East Friesian Dairy	East Friesian Dairy	EFR	Ovis aries	28.48	long thin-tailed
FIOA-FIN02	Europe	SRR501879	Finn	Finn	FIN	Ovis aries	10.02	short thin-tailed
FIOA-FIN50	Europe	SRR11657543	Finn	Finn	FIN	Ovis aries	27.99	short thin-tailed
FIOA-FIN51	Europe	SRR11657544	Finn	Finn	FIN	Ovis aries	24.97	short thin-tailed
FIOA-FIN52	Europe	SRR11657545	Finn	Finn	FIN	Ovis aries	26	short thin-tailed
FIOA-FIN53	Europe	SRR11657546	Finn	Finn	FIN	Ovis aries	27.98	short thin-tailed
FIOA-FIN54	Europe	SRR11657547	Finn	Finn	FIN	Ovis aries	28.09	short thin-tailed
FIOA-FIN55	Europe	SRR11657548	Finn	Finn	FIN	Ovis aries	23.98	short thin-tailed
FIOA-FIN56	Europe	SRR11657549	Finn	Finn	FIN	Ovis aries	29.91	short thin-tailed
FIOA-FIN57	Europe	SRR11657550	Finn	Finn	FIN	Ovis aries	24.788	short thin-tailed
FIOA-FIN58	Europe	SRR11657551	Finn	Finn	FIN	Ovis aries	26	short thin-tailed
FIOA-FIN59	Europe	SRR11657552	Finn	Finn	FIN	Ovis aries	26.04	short thin-tailed
DEOA-DEM01	Europe	unpublished	German merino	German merino	DEM	Ovis aries	11.054	long thin-tailed
DEOA-DEM02	Europe	unpublished	German merino	German merino	DEM	Ovis aries	8.7095	long thin-tailed
DEOA-DEM03	Europe	unpublished	German merino	German merino	DEM	Ovis aries	8.0688	long thin-tailed
DEOA-DEM04	Europe	unpublished	German merino	German merino	DEM	Ovis aries	9.0278	long thin-tailed
DEOA-DEM05	Europe	unpublished	German merino	German merino	DEM	Ovis aries	9.967	long thin-tailed
DEOA-DEM06	Europe	unpublished	German merino	German merino	DEM	Ovis aries	8.6603	long thin-tailed
DEOA-DEM07	Europe	unpublished	German merino	German merino	DEM	Ovis aries	8.9944	long thin-tailed
DEOA-DEM08	Europe	unpublished	German merino	German merino	DEM	Ovis aries	10.999	long thin-tailed
DEOA-DEM13	Europe	unpublished	German merino	German merino	DEM	Ovis aries	9.5722	long thin-tailed
DEOA-DEM14	Europe	unpublished	German merino	German merino	DEM	Ovis aries	11.021	long thin-tailed
DEOA-DEM15	Europe	unpublished	German merino	German merino	DEM	Ovis aries	10.128	long thin-tailed
DEOA-DEM16	Europe	unpublished	German merino	German merino	DEM	Ovis aries	9.9814	long thin-tailed
DEOA-DEM17	Europe	unpublished	German merino	German merino	DEM	Ovis aries	11.22	long thin-tailed
DEOA-DEM18	Europe	unpublished	German merino	German merino	DEM	Ovis aries	8.9089	long thin-tailed
DEOA-DEM19	Europe	unpublished	German merino	German merino	DEM	Ovis aries	9.1007	long thin-tailed
DEOA-DEM20	Europe	unpublished	German merino	German merino	DEM	Ovis aries	9.427	long thin-tailed
DEOA-DEM21	Europe	unpublished	German merino	German merino	DEM	Ovis aries	9.1579	long thin-tailed
DEOA-DEM23	Europe	SRR501887	German merino	German merino	DEM	Ovis aries	11.995	long thin-tailed
DEOA-DEM24	Europe	SRR501852	German merino	German merino	DEM	Ovis aries	13.007	long thin-tailed
DEOA-DEM25	Europe	SRR501868	German merino	German merino	DEM	Ovis aries	12.051	long thin-tailed
NLOA-GTL01	Europe	SRR11657690	Gotland	Gotland	GTL	Ovis aries	25.001	short thin-tailed
NLOA-GTL02	Europe	SRR11657691	Gotland	Gotland	GTL	Ovis aries	25.137	short thin-tailed
NLOA-GTL03	Europe	SRR11657692	Gotland	Gotland	GTL	Ovis aries	24.746	short thin-tailed
NLOA-GTL04	Europe	SRR11657693	Gotland	Gotland	GTL	Ovis aries	24.434	short thin-tailed
NLOA-GTL05	Europe	SRR11657694	Gotland	Gotland	GTL	Ovis aries	24.016	short thin-tailed
NLOA-GTL06	Europe	SRR11657695	Gotland	Gotland	GTL	Ovis aries	23.975	short thin-tailed
NLOA-GTL07	Europe	SRR11657696	Gotland	Gotland	GTL	Ovis aries	24.849	short thin-tailed
NLOA-GTL08	Europe	SRR11657698	Gotland	Gotland	GTL	Ovis aries	24.486	short thin-tailed
NLOA-GTL09	Europe	SRR11657699	Gotland	Gotland	GTL	Ovis aries	24.819	short thin-tailed
NLOA-GTL10	Europe	SRR11657700	Gotland	Gotland	GTL	Ovis aries	25.123	short thin-tailed
NWOA-FRL01	Europe	SRR12396869	Norway	Norway	NOR	Ovis aries	23.429	-
NWOA-FRL02	Europe	SRR12396870	Norway	Norway	NOR	Ovis aries	24.588	-
NWOA-FRL03	Europe	SRR12396871	Norway	Norway	NOR	Ovis aries	20.954	-
NWOA-GTS01	Europe	SRR12396872	Norway	Norway	NOR	Ovis aries	23.092	-
NWOA-NWB01	Europe	SRR12396866	Norway	Norway	NOR	Ovis aries	24.414	-
NWOA-NWB02	Europe	SRR12396867	Norway	Norway	NOR	Ovis aries	21.933	-
NWOA-NWB03	Europe	SRR12396868	Norway	Norway	NOR	Ovis aries	21.967	-
NWOA-OSP01	Europe	SRR12396873	Norway	Norway	NOR	Ovis aries	23.911	-
NWOA-OSP02	Europe	SRR12396875	Norway	Norway	NOR	Ovis aries	25.362	-
NWOA-OSP03	Europe	SRR12396876	Norway	Norway	NOR	Ovis aries	20.728	-
NLOA-OUE01	Europe	SRR11657535	Ouessant	Ouessant	OUE	Ovis aries	24.179	short thin-tailed
NLOA-OUE02	Europe	SRR11657536	Ouessant	Ouessant	OUE	Ovis aries	27.888	short thin-tailed
NLOA-OUE03	Europe	SRR11657537	Ouessant	Ouessant	OUE	Ovis aries	24.017	short thin-tailed
NLOA-OUE04	Europe	SRR11657538	Ouessant	Ouessant	OUE	Ovis aries	24.062	short thin-tailed
NLOA-OUE05	Europe	SRR11657539	Ouessant	Ouessant	OUE	Ovis aries	27.021	short thin-tailed
NLOA-OUE06	Europe	SRR11657540	Ouessant	Ouessant	OUE	Ovis aries	24.879	short thin-tailed
NLOA-OUE07	Europe	SRR11657541	Ouessant	Ouessant	OUE	Ovis aries	26.441	short thin-tailed
NLOA-OUE08	Europe	SRR11657720	Ouessant	Ouessant	OUE	Ovis aries	25.624	short thin-tailed
NLOA-OUE09	Europe	SRR11657721	Ouessant	Ouessant	OUE	Ovis aries	24.879	short thin-tailed
NLOA-OUE10	Europe	SRR11657722	Ouessant	Ouessant	OUE	Ovis aries	24.566	short thin-tailed
AUOA-POD01	Europe	SRR501910	Poll Dorset	Poll Dorset	POD	Ovis aries	8.6297	long thin-tailed
AUOA-POD11	Europe	SRR5991220	Poll Dorset	Poll Dorset	POD	Ovis aries	14.048	long thin-tailed
AUOA-POD12	Europe	SRR5991221	Poll Dorset	Poll Dorset	POD	Ovis aries	9.8389	long thin-tailed
AUOA-POD13	Europe	SRR5991222	Poll Dorset	Poll Dorset	POD	Ovis aries	6.5853	long thin-tailed
AUOA-POD14	Europe	SRR5991223	Poll Dorset	Poll Dorset	POD	Ovis aries	8.7299	long thin-tailed
AUOA-POD15	Europe	SRR5991224	Poll Dorset	Poll Dorset	POD	Ovis aries	9.0907	long thin-tailed
AUOA-POD16	Europe	SRR5991225	Poll Dorset	Poll Dorset	POD	Ovis aries	14.557	long thin-tailed
AUOA-POD17	Europe	SRR5991226	Poll Dorset	Poll Dorset	POD	Ovis aries	9.8104	long thin-tailed
AUOA-POD18	Europe	SRR5991227	Poll Dorset	Poll Dorset	POD	Ovis aries	10.977	long thin-tailed
AUOA-POD19	Europe	SRR5991276	Poll Dorset	Poll Dorset	POD	Ovis aries	10.708	long thin-tailed
AUOA-POD20	Europe	SRR5991277	Poll Dorset	Poll Dorset	POD	Ovis aries	11.074	long thin-tailed
AUOA-POD21	Europe	SRR5991313	Poll Dorset	Poll Dorset	POD	Ovis aries	8.9209	long thin-tailed
AUOA-POD22	Europe	SRR5991394	Poll Dorset	Poll Dorset	POD	Ovis aries	13.466	long thin-tailed
AUOA-POD23	Europe	SRR5991395	Poll Dorset	Poll Dorset	POD	Ovis aries	17.816	long thin-tailed
AUOA-POD24	Europe	SRR5991396	Poll Dorset	Poll Dorset	POD	Ovis aries	11.025	long thin-tailed
AUOA-POD25	Europe	SRR5991397	Poll Dorset	Poll Dorset	POD	Ovis aries	11.897	long thin-tailed
AUOA-POD26	Europe	SRR5991398	Poll Dorset	Poll Dorset	POD	Ovis aries	9.0659	long thin-tailed
AUOA-POD27	Europe	SRR5991399	Poll Dorset	Poll Dorset	POD	Ovis aries	8.7621	long thin-tailed
AUOA-POD28	Europe	SRR5991401	Poll Dorset	Poll Dorset	POD	Ovis aries	7.9726	long thin-tailed
AUOA-POD29	Europe	SRR5991432	Poll Dorset	Poll Dorset	POD	Ovis aries	10.627	long thin-tailed
AUOA-POD30	Europe	SRR5991434	Poll Dorset	Poll Dorset	POD	Ovis aries	8.1873	long thin-tailed
dorset	Europe	SRR17023436	Poll Dorset	Poll Dorset	POD	Ovis aries	23.361	long thin-tailed
ENOA-RMN01	Europe	SRR12396925	Romney	Romney	ROM	Ovis aries	22.826	long thin-tailed
ENOA-RMN02	Europe	SRR12396992	Romney	Romney	ROM	Ovis aries	22.807	long thin-tailed
GBOA-ROM01	Europe	SRR501859	Romney	Romney	ROM	Ovis aries	12.893	long thin-tailed
romney	Europe	SRR17155254	Romney	Romney	ROM	Ovis aries	23.668	long thin-tailed
RUOA-BAD01	Europe	SRR12396916	Russia	Russia	RUS	Ovis aries	24.614	-
RUOA-BAD02	Europe	SRR12396917	Russia	Russia	RUS	Ovis aries	22.747	-
RUOA-CAU01	Europe	SRR12396897	Russia	Russia	RUS	Ovis aries	19.337	-
RUOA-DME01	Europe	SRR12396896	Russia	Russia	RUS	Ovis aries	23.934	-
RUOA-IMP01	Europe	SRR12396984	Russia	Russia	RUS	Ovis aries	22.15	-
RUOA-IMP02	Europe	SRR12396985	Russia	Russia	RUS	Ovis aries	24.759	-
RUOA-IMP03	Europe	SRR12396986	Russia	Russia	RUS	Ovis aries	23.165	-
RUOA-KBS01	Europe	SRR12396892	Russia	Russia	RUS	Ovis aries	20.948	-
RUOA-KBS02	Europe	SRR12396893	Russia	Russia	RUS	Ovis aries	20.213	-
RUOA-KBS03	Europe	SRR12396894	Russia	Russia	RUS	Ovis aries	20.975	-
RUOA-ROM01	Europe	SRR12396891	Russia	Russia	RUS	Ovis aries	24	-
NLOA-SEL01	Europe	SRR11657712	Shetland	Shetland	SEL	Ovis aries	23.905	short thin-tailed
NLOA-SEL02	Europe	SRR11657713	Shetland	Shetland	SEL	Ovis aries	24.498	short thin-tailed
NLOA-SEL03	Europe	SRR11657714	Shetland	Shetland	SEL	Ovis aries	23.869	short thin-tailed
NLOA-SEL04	Europe	SRR11657715	Shetland	Shetland	SEL	Ovis aries	22.957	short thin-tailed
NLOA-SEL05	Europe	SRR11657716	Shetland	Shetland	SEL	Ovis aries	23.677	short thin-tailed
NLOA-SEL06	Europe	SRR11657717	Shetland	Shetland	SEL	Ovis aries	23.444	short thin-tailed
NLOA-SEL07	Europe	SRR11657718	Shetland	Shetland	SEL	Ovis aries	23.075	short thin-tailed
NLOA-SOG01	Europe	SRR11657701	Solognote	Solognote	SOG	Ovis aries	25.141	long thin-tailed
NLOA-SOG02	Europe	SRR11657702	Solognote	Solognote	SOG	Ovis aries	24.837	long thin-tailed
NLOA-SOG03	Europe	SRR11657703	Solognote	Solognote	SOG	Ovis aries	24.812	long thin-tailed
NLOA-SOG04	Europe	SRR11657704	Solognote	Solognote	SOG	Ovis aries	24.482	long thin-tailed
NLOA-SOG05	Europe	SRR11657705	Solognote	Solognote	SOG	Ovis aries	24.065	long thin-tailed
NLOA-SOG06	Europe	SRR11657706	Solognote	Solognote	SOG	Ovis aries	25.09	long thin-tailed
NLOA-SOG07	Europe	SRR11657707	Solognote	Solognote	SOG	Ovis aries	25.112	long thin-tailed
NLOA-SOG08	Europe	SRR11657709	Solognote	Solognote	SOG	Ovis aries	27.964	long thin-tailed
NLOA-SOG09	Europe	SRR11657710	Solognote	Solognote	SOG	Ovis aries	25.216	long thin-tailed
NLOA-SOG10	Europe	SRR11657711	Solognote	Solognote	SOG	Ovis aries	24.569	long thin-tailed
ESOA-CAS01	Europe	SRR501883	Spain	Spain	ESP	Ovis aries	13.982	long thin-tailed
ESOA-CAS02	Europe	SRR501904	Spain	Spain	ESP	Ovis aries	17.936	long thin-tailed
ESOA-CHU01	Europe	SRR501848	Spain	Spain	ESP	Ovis aries	11.622	long thin-tailed
ESOA-CHU02	Europe	SRR501909	Spain	Spain	ESP	Ovis aries	13.808	long thin-tailed
ESOA-OJA01	Europe	SRR501900	Spain	Spain	ESP	Ovis aries	11.452	long thin-tailed
ESOA-OJA02	Europe	SRR501911	Spain	Spain	ESP	Ovis aries	11.399	long thin-tailed
ESOA-RIP01	Europe	SRR12396910	Spain	Spain	ESP	Ovis aries	22.034	long thin-tailed
ESOA-SAL02	Europe	SRR501841	Spain	Spain	ESP	Ovis aries	13.435	long thin-tailed
ESOA-SAL03	Europe	SRR501842	Spain	Spain	ESP	Ovis aries	14.306	long thin-tailed
AUOA-BSF02	Europe	SRR5991403	Suffolk	Suffolk	SFK	Ovis aries	11.562	long thin-tailed
CNOA-SFK01	Europe	SRR11657648	Suffolk	Suffolk	SFK	Ovis aries	23.688	long thin-tailed
CNOA-SFK02	Europe	SRR11657649	Suffolk	Suffolk	SFK	Ovis aries	24.441	long thin-tailed
CNOA-SFK03	Europe	SRR11657650	Suffolk	Suffolk	SFK	Ovis aries	23.627	long thin-tailed
CNOA-SFK04	Europe	SRR11657651	Suffolk	Suffolk	SFK	Ovis aries	24.572	long thin-tailed
CNOA-SFK05	Europe	SRR11657652	Suffolk	Suffolk	SFK	Ovis aries	29.666	long thin-tailed
CNOA-SFK06	Europe	SRR11657653	Suffolk	Suffolk	SFK	Ovis aries	26.292	long thin-tailed
CNOA-SFK07	Europe	SRR11657654	Suffolk	Suffolk	SFK	Ovis aries	24.477	long thin-tailed
CNOA-SFK08	Europe	SRR11657655	Suffolk	Suffolk	SFK	Ovis aries	29.44	long thin-tailed
CNOA-SFK09	Europe	SRR11657656	Suffolk	Suffolk	SFK	Ovis aries	25.701	long thin-tailed
CNOA-SFK10	Europe	SRR11657657	Suffolk	Suffolk	SFK	Ovis aries	24.571	long thin-tailed
SFK9	Europe	SRR17165101	Suffolk	Suffolk	SFK	Ovis aries	23.061	long thin-tailed
AUOA-WSF01	Europe	SRR5991196	SUFFOLK WHITE	SUFFOLK WHITE	WSF	Ovis aries	7.9912	long thin-tailed
AUOA-WSF02	Europe	SRR5991292	SUFFOLK WHITE	SUFFOLK WHITE	WSF	Ovis aries	13.082	long thin-tailed
AUOA-WSF04	Europe	SRR5991294	SUFFOLK WHITE	SUFFOLK WHITE	WSF	Ovis aries	11.777	long thin-tailed
AUOA-WSF05	Europe	SRR5991295	SUFFOLK WHITE	SUFFOLK WHITE	WSF	Ovis aries	10.281	long thin-tailed
AUOA-WSF06	Europe	SRR5991296	SUFFOLK WHITE	SUFFOLK WHITE	WSF	Ovis aries	5.2593	long thin-tailed
AUOA-WSF07	Europe	SRR5991297	SUFFOLK WHITE	SUFFOLK WHITE	WSF	Ovis aries	19.356	long thin-tailed
AUOA-WSF08	Europe	SRR5991298	SUFFOLK WHITE	SUFFOLK WHITE	WSF	Ovis aries	15.883	long thin-tailed
AUOA-WSF09	Europe	SRR5991299	SUFFOLK WHITE	SUFFOLK WHITE	WSF	Ovis aries	17.709	long thin-tailed
AUOA-WSF10	Europe	SRR5991300	SUFFOLK WHITE	SUFFOLK WHITE	WSF	Ovis aries	10.936	long thin-tailed
AUOA-WSF11	Europe	SRR5991301	SUFFOLK WHITE	SUFFOLK WHITE	WSF	Ovis aries	19.589	long thin-tailed
AUOA-WSF12	Europe	SRR5991302	SUFFOLK WHITE	SUFFOLK WHITE	WSF	Ovis aries	11.789	long thin-tailed
AUOA-WSF13	Europe	SRR5991433	SUFFOLK WHITE	SUFFOLK WHITE	WSF	Ovis aries	11.584	long thin-tailed
CHOA-SMS01	Europe	SRR501864	Swiss White Alpine	Swiss White Alpine	SWA	Ovis aries	9.9907	long thin-tailed
CHOA-SWA01	Europe	SRR501908	Swiss White Alpine	Swiss White Alpine	SWA	Ovis aries	13.825	long thin-tailed
CHOA-SWA02	Europe	SRR501862	Swiss White Alpine	Swiss White Alpine	SWA	Ovis aries	14.365	long thin-tailed
CHOA-SWA03	Europe	SRR501884	Swiss White Alpine	Swiss White Alpine	SWA	Ovis aries	13.169	long thin-tailed
NLOA-TEX10	Europe	SRR12396988	Texel	Texel	TEX	Ovis aries	25.198	long thin-tailed
NLOA-TEX11	Europe	SRR12396989	Texel	Texel	TEX	Ovis aries	24.607	long thin-tailed
NLOA-TEX12	Europe	SRR12396990	Texel	Texel	TEX	Ovis aries	21.286	long thin-tailed
Tex2	Europe	SRR16998307	Texel	Texel	TEX	Ovis aries	22.58	long thin-tailed
AUOA-TEX01	Europe	SRR5991197	Texel	Texel	TEX	Ovis aries	10.3342	long thin-tailed
AUOA-TEX02	Europe	SRR5991198	Texel	Texel	TEX	Ovis aries	7.4216	long thin-tailed
CNOA-TEX01	Europe	unpublished	Texel	Texel	TEX	Ovis aries	43.0949	long thin-tailed
CNOA-TEX02	Europe	unpublished	Texel	Texel	TEX	Ovis aries	35.3273	long thin-tailed
CNOA-TEX03	Europe	unpublished	Texel	Texel	TEX	Ovis aries	15.2664	long thin-tailed
NLOA-TEX01	Europe	unpublished	Texel	Texel	TEX	Ovis aries	12.3529	long thin-tailed
IROA-AFS02	Middle east	SRR501871	Afshari	Afshari	AFS	Ovis aries	12.801	long fat-tailed
IROA-AFS50	Middle east	SRR11657629	Afshari	Afshari	AFS	Ovis aries	23.421	long fat-tailed
IROA-AFS51	Middle east	SRR12396956	Afshari	Afshari	AFS	Ovis aries	22.824	long fat-tailed
IROA-AFS52	Middle east	SRR12396957	Afshari	Afshari	AFS	Ovis aries	22.199	long fat-tailed
IROA-AFS53	Middle east	SRR12396958	Afshari	Afshari	AFS	Ovis aries	21.053	long fat-tailed
IQOA-AWA01	Middle east	SRR11657624	Awassi	Awassi	AWA	Ovis aries	20.34	-
IQOA-AWA02	Middle east	SRR12396963	Awassi	Awassi	AWA	Ovis aries	20.274	-
TROA-AWT01	Middle east	SRR501893	Awassi	Awassi	AWA	Ovis aries	9.9928	-
TROA-AWT02	Middle east	SRR501872	Awassi	Awassi	AWA	Ovis aries	14.145	-
TROA-AWT03	Middle east	SRR501890	Awassi	Awassi	AWA	Ovis aries	13.424	-
EGOA-OSM01	Middle east	SRR12396862	Egypt	Egypt	EGY	Ovis aries	21.923	-
EGOA-OSM02	Middle east	SRR12396863	Egypt	Egypt	EGY	Ovis aries	23.259	-
EGOA-RAH01	Middle east	SRR12396947	Egypt	Egypt	EGY	Ovis aries	20.901	-
EGOA-RAH02	Middle east	SRR12396976	Egypt	Egypt	EGY	Ovis aries	23.057	-
EGOA-RAH03	Middle east	SRR12396987	Egypt	Egypt	EGY	Ovis aries	22.743	-
IROA-BLZ01	Middle east	SRR12396859	Baluchi	Iran	IRI	Ovis aries	20.378	-
IROA-BLZ02	Middle east	SRR12396937	Baluchi	Iran	IRI	Ovis aries	24.02	-
IROA-BLZ03	Middle east	SRR12397022	Baluchi	Iran	IRI	Ovis aries	18.9	-
IROA-GEZ01	Middle east	SRR12396959	Ghezel	Iran	IRI	Ovis aries	21.361	-
IROA-GEZ02	Middle east	SRR12396960	Ghezel	Iran	IRI	Ovis aries	20.707	-
IROA-GEZ03	Middle east	SRR11657628	Ghezel	Iran	IRI	Ovis aries	20.932	-
IROA-GRS01	Middle east	SRR12396936	Grey-Shiraz	Iran	IRI	Ovis aries	22.168	-
IROA-GRS02	Middle east	SRR12396961	Grey-Shiraz	Iran	IRI	Ovis aries	20.235	-
IROA-GRS03	Middle east	SRR12396962	Grey-Shiraz	Iran	IRI	Ovis aries	19.01	-
IROA-HSS01	Middle east	SRR11657627	Grey-Shiraz	Iran	IRI	Ovis aries	19.94	-
IROA-LOC02	Middle east	ERR157934	Iran Local breed	Iran	IRI	Ovis aries	13.779	-
IROA-LOC05	Middle east	ERR157940	Iran Local breed	Iran	IRI	Ovis aries	14.189	-
IROA-LOC09	Middle east	ERR297223	Iran Local breed	Iran	IRI	Ovis aries	12.728	-
IROA-LOC16	Middle east	ERR299282	Iran Local breed	Iran	IRI	Ovis aries	13.355	-
IROA-LOC17	Middle east	ERR299285	Iran Local breed	Iran	IRI	Ovis aries	13.83	-
IROA-KAL01	Middle east	SRR12396932	Karakul	Iran	IRI	Ovis aries	22.373	-
IROA-KAL02	Middle east	SRR12396933	Karakul	Iran	IRI	Ovis aries	20.742	-
IROA-KAL03	Middle east	SRR12396935	Karakul	Iran	IRI	Ovis aries	22.004	-
IROA-KAL04	Middle east	SRR11657634	Karakul	Iran	IRI	Ovis aries	24.232	-
3267-iran	Middle east	SRR17139386	Kermani	Iran	IRI	Ovis aries	11.831	-
IROA-MAK01	Middle east	SRR11657631	Makui	Iran	IRI	Ovis aries	19.89	-
IROA-MAK02	Middle east	SRR12397021	Makui	Iran	IRI	Ovis aries	20.745	-
IROA-MGH01	Middle east	SRR12397019	Moghani	Iran	IRI	Ovis aries	22.594	-
IROA-MGH02	Middle east	SRR12397020	Moghani	Iran	IRI	Ovis aries	21.987	-
IROA-MOG01	Middle east	SRR11657633	Moghani	Iran	IRI	Ovis aries	19.703	-
IROA-SAL01	Middle east	SRR12396952	Shal	Iran	IRI	Ovis aries	16.151	-
IROA-SAL02	Middle east	SRR12396953	Shal	Iran	IRI	Ovis aries	25.19	-
IROA-SAL03	Middle east	SRR12396955	Shal	Iran	IRI	Ovis aries	22.37	-
IROA-SHS01	Middle east	SRR11657630	Shal	Iran	IRI	Ovis aries	26.126	-
TROA-CCS01	Middle east	SRR501875	Turkey	Turkey	TUR	Ovis aries	12.975	-
TROA-KRS02	Middle east	SRR501867	Turkey	Turkey	TUR	Ovis aries	11.231	-
TROA-KRS03	Middle east	SRR501886	Turkey	Turkey	TUR	Ovis aries	12.944	-
TROA-NDZ01	Middle east	SRR501888	Turkey	Turkey	TUR	Ovis aries	10.52	-
TROA-SKZ01	Middle east	SRR501843	Turkey	Turkey	TUR	Ovis aries	11.024	-
TROA-SKZ02	Middle east	SRR501878	Turkey	Turkey	TUR	Ovis aries	11.171	-
CNOM-AGL01	wild	SRR12396880	Argali	Argali	AGL	Ovis ammon	20.96	short thin-tailed
CNOM-AGL02	wild	SRR12396881	Argali	Argali	AGL	Ovis ammon	23	short thin-tailed
CNOM-AGL03	wild	SRR12396882	Argali	Argali	AGL	Ovis ammon	27.98	short thin-tailed
CNOM-AGL04	wild	SRR12396883	Argali	Argali	AGL	Ovis ammon	23.01	short thin-tailed
CNOM-AGL05	wild	SRR12396885	Argali	Argali	AGL	Ovis ammon	22.25	short thin-tailed
CNOM-AGL06	wild	SRR12396886	Argali	Argali	AGL	Ovis ammon	20.99	short thin-tailed
CNOM-AGL07	wild	SRR12396887	Argali	Argali	AGL	Ovis ammon	21.7	short thin-tailed
CNOM-AGL08	wild	SRR12396951	Argali	Argali	AGL	Ovis ammon	24.02	short thin-tailed
IROO-AMU01	wild	SRR11657500	Mouflon	Mouflon	MOF	Ovis orientalis orientalis	31.973	short thin-tailed
IROO-AMU02	wild	SRR11657501	Mouflon	Mouflon	MOF	Ovis orientalis orientalis	28	short thin-tailed
IROO-AMU03	wild	SRR11657502	Mouflon	Mouflon	MOF	Ovis orientalis orientalis	27.731	short thin-tailed
IROO-AMU04	wild	SRR11657503	Mouflon	Mouflon	MOF	Ovis orientalis orientalis	27.06	short thin-tailed
IROO-AMU05	wild	SRR11657504	Mouflon	Mouflon	MOF	Ovis orientalis orientalis	38.218	short thin-tailed
IROO-AMU06	wild	SRR11657505	Mouflon	Mouflon	MOF	Ovis orientalis orientalis	29.043	short thin-tailed
IROO-AMU07	wild	SRR11657506	Mouflon	Mouflon	MOF	Ovis orientalis orientalis	24.042	short thin-tailed
IROO-AMU08	wild	SRR11657507	Mouflon	Mouflon	MOF	Ovis orientalis orientalis	25.068	short thin-tailed
IROO-AMU09	wild	SRR11657635	Mouflon	Mouflon	MOF	Ovis orientalis orientalis	32.972	short thin-tailed
IROO-AMU10	wild	SRR11657636	Mouflon	Mouflon	MOF	Ovis orientalis orientalis	26.12	short thin-tailed
IROO-AMU11	wild	SRR11657637	Mouflon	Mouflon	MOF	Ovis orientalis orientalis	26.368	short thin-tailed
IROO-AMU12	wild	SRR11657638	Mouflon	Mouflon	MOF	Ovis orientalis orientalis	29.617	short thin-tailed
IROO-AMU13	wild	SRR11657639	Mouflon	Mouflon	MOF	Ovis orientalis orientalis	27.446	short thin-tailed
IROO-AMU14	wild	SRR11657640	Mouflon	Mouflon	MOF	Ovis orientalis orientalis	38.02	short thin-tailed
IROO-AMU15	wild	SRR11657641	Mouflon	Mouflon	MOF	Ovis orientalis orientalis	25.8	short thin-tailed
IROO-AMU16	wild	SRR11657642	Mouflon	Mouflon	MOF	Ovis orientalis orientalis	27.679	short thin-tailed
IROO-ORI01	wild	ERR157930	Mouflon	Mouflon	MOF	Ovis orientalis orientalis	14.039	short thin-tailed
IROO-ORI02	wild	ERR157931	Mouflon	Mouflon	MOF	Ovis orientalis orientalis	14.016	short thin-tailed
IROO-ORI03	wild	ERR157932	Mouflon	Mouflon	MOF	Ovis orientalis orientalis	13.97	short thin-tailed
IROO-ORI04	wild	ERR157938	Mouflon	Mouflon	MOF	Ovis orientalis orientalis	14.921	short thin-tailed
IROO-ORI05	wild	ERR157939	Mouflon	Mouflon	MOF	Ovis orientalis orientalis	13.059	short thin-tailed
IROO-ORI06	wild	ERR157942	Mouflon	Mouflon	MOF	Ovis orientalis orientalis	13.976	short thin-tailed
IROO-ORI07	wild	ERR157944	Mouflon	Mouflon	MOF	Ovis orientalis orientalis	14.516	short thin-tailed
IROO-ORI08	wild	ERR332573	Mouflon	Mouflon	MOF	Ovis orientalis orientalis	15.98	short thin-tailed
IROO-ORI09	wild	ERR332575	Mouflon	Mouflon	MOF	Ovis orientalis orientalis	15.09	short thin-tailed
IROO-ORI10	wild	ERR332582	Mouflon	Mouflon	MOF	Ovis orientalis orientalis	15.845	short thin-tailed
IROO-ORI11	wild	ERR332589	Mouflon	Mouflon	MOF	Ovis orientalis orientalis	13.1	short thin-tailed
IROO-ORI12	wild	ERR340346	Mouflon	Mouflon	MOF	Ovis orientalis orientalis	13.101	short thin-tailed
IROO-ORI13	wild	ERR466544	Mouflon	Mouflon	MOF	Ovis orientalis orientalis	12.176	short thin-tailed
IROO-ORI14	wild	ERR157935	Mouflon	Mouflon	MOF	Ovis orientalis orientalis	13.981	short thin-tailed
IROO-ORI15	wild	ERR315509	Mouflon	Mouflon	MOF	Ovis orientalis orientalis	12.966	short thin-tailed
IROO-ORI16	wild	ERR332587	Mouflon	Mouflon	MOF	Ovis orientalis orientalis	12.393	short thin-tailed
IROO-ORI18	wild	ERR466546	Mouflon	Mouflon	MOF	Ovis orientalis orientalis	12.834	short thin-tailed

## Sheet: S2
Supplemental Table S2 Information of the primary and partially phased assemblies.
Breeds	Abbr.	Sex	Assembly	Assembly length (Gb)	Contig N50 (Mb)	Contig number	Gaps on chromosomes	Depth	BUSCO (%)	Base accuracy	heterozygosity
East Friesian	FRI1	Male	Primary	2.9	85.1	982	28	28.0154	94.4	48.173	0.0014528
			hap1/hap2	2.77/2.75	62.9/53.2			-	91.3/92.8	48.4/48.5
Polled Dorset	DOR1	Female	Primary	2.91	92.4	1293	35	25	94.3	45.538	0.00165343
			hap1/hap2	2.86/2.83	32.8/39.5			-	93.4/92.7	45.6/45.6
Charollais	CHA1	Female	Primary	2.86	71.5	1427	76	19.2123	94.1	44.12	0.00185056
			hap1/hap2	2.82/2.80	6.4/5.1			-	91.7/92.1	44.3/44.3
Romney	ROM1	Male	Primary	2.86	68.3	1552	70	19.2558	94.4	43.242	0.00186181
			hap1/hap2	2.81/2.82	6.3/5.7			-	92.1/92.4	43.3/43.1
Suffolk	SFK1	Female	Primary	2.88	65.3	1513	76	18.7948	94.3	43.357	0.0018071
			hap1/hap2	2.86/2.80	5.7/4.9			-	92.4/92.5	43.2/43.3
Texel	TEX1	Female	Primary	2.82	47.6	1835	146	17.8932	94.4	44.636	0.00168145
			hap1/hap2	2.76/2.75	4.52/4.49			-	91.4/90.2	44.8/44.8
White Dorper	WDU1	Female	Primary	2.81	17.8	2125	375	15.4249	93.8	41.73	0.00178848
			hap1/hap2	2.82/2.77	1.58/1.26			-	90.2/89.8	41.9/41.8
Chiniese Merino	MER1	Female	Primary	2.84	60	1773	97	18.7273	94.2	43.333	0.00204818
			hap1/hap2	2.82/2.83	3.7/4.8			-	92.1/90.0	43.4/43.3
Romanov	RMV1	Female	Primary	2.94	71.7	1354	95	20.2	94.3	49.3	0.0023749
			hap1/hap2	2.83/2.92	6.6/5.2				93.0/93.2	48.6/48.8
Kermani	KER1	Male	Primary	2.82	80.3	1675	90	21.651	93.8	45.2	0.00149491
			hap1/hap2	2.77/2.75	15.4/15.2			-	90.7/92.2	45.4/45.6
Waggir	WAG1	Male	Primary	2.94	73.6	842	38	22.3	94.4	47.3	0.00244447
			hap1/hap2	2.83/2.92	11.8/16.9				93.9/93.7	47.1/47.0
Kazak	KAZ1	Female	Primary	2.87	73.4	1849	59	22.4002	93.4	46.253	0.00209541
			hap1/hap2	2.85/2.84	10.7/13.9			-	92.3/91.9	46.6/46.4
Ujimqin	UJM1	Female	Primary	2.87	75.6	1534	63	21.325	94.4	44.389	0.00205816
			hap1/hap2	2.86/2.84	11.5/11.7			-	93.9/93.5	44.5/44.6
Qiaoke	QK1	Female	Primary	2.87	75	1654	58	21.4569	94	47.128	0.00200377
			hap1/hap2	2.83/2.84	13.6/9.9			-	92.6/93.4	47.6/47.2
Yunnan	YUN1	Female	Primary	2.91	73.9	1293	39	22	94.1	46.852	0.00168947
			hap1/hap2	2.89/2.85	18.7/13.1			-	93.6/93.4	46.7/46.6

## Sheet: S3
Supplemental Table S3 Estimated sheep genome sizes from different sheep genomes in this study.
Sheep	K-mer number	Raw k-mer peak	Coverage depth peak (×)	Estimated genome size (Gb)	Sequencing depth (×)
KAZ1	61526305945	19	19.9397	3.09	16.3513
DOR1	61263629182	19	19.9585	3.07	16.0825
FRI1	84058441785	29	29.6219	2.84	27.187
MER1	61866889337	20	20.738	2.98	17.2971
QK1	57141034448	18	18.8378	3.03	15.4369
ROM1	61827282835	19	19.9649	3.1	16.5834
SFK1	59434563593	19	19.7985	3	16.5563
TEX1	58666740412	19	19.7314	2.97	16.2958
WDU1	62643918651	20	20.8584	3	17.1767
UJM1	60660780450	19	19.9199	3.05	17.2497
CHA1	62997925426	20	20.8678	3.02	17.7228
YUN1	57582533389	18	18.8671	3.05	15.4208
WAG1	78632862442	25	25.9067	3.04	25.4996

## Sheet: S4
Supplemental Table S4 Centromeric and telomeric contents in unplaced contigs of the 15 primary assemblies.
ID	TotalLength	RepeatLength	RepeatPercent	SatelliteCentrLength	SatelliteCentrPercent	TelomereLength	TelomerePercent
2H1-kazak	199919453	161815391	0.8094	158230941	0.7915	328506	0.0016
3267-iran	135550864	118430908	0.8737	115276530	0.8504	169068	0.0012
dorset	212733149	189704778	0.8917	185317286	0.8711	357774	0.0017
frisen	224342561	198869726	0.8865	194600709	0.8674	351312	0.0016
merino	175157946	147948466	0.8447	143700509	0.8204	272634	0.0016
qiaoke	191573004	166586752	0.8696	163237913	0.8521	271506	0.0014
romanov	257698314	228142022	0.8853	220123259	0.8542	473496	0.0018
romney	190828025	162672665	0.8525	158622822	0.8312	321882	0.0017
SFK9	201881109	176065390	0.8721	172246986	0.8532	332490	0.0016
Tex2	161343840	140799994	0.8727	136382088	0.8453	233694	0.0014
wagner	227766662	200832763	0.8817	194180073	0.8525	396990	0.0017
Wdu2	149747474	125834267	0.8403	120107143	0.8021	206286	0.0014
wuzhumuqin	198374890	169737504	0.8556	165364711	0.8336	343710	0.0017
xialuolai	182464772	157651374	0.864	153301845	0.8402	277920	0.0015
YN3	204395877	176354425	0.8628	171607319	0.8396	398028	0.0019
ARS-UI_Ramb_v2.0	12480929	8084507	0.6477	3124383	0.2503	100944	0.0081

## Sheet: S5
Supplemental Table S5 List of the biallelic insertions and deletions identified in this study.
Chromosome	SV start	SV end	Annotated genes	SV locations	SV length	SV id	Genes in insertions
1	30063	30277	NONE(dist=NONE),LOC114112203(dist=16478)	intergenic	214	DEL.1	-
1	34438	34438	NONE(dist=NONE),LOC114112203(dist=12317)	intergenic	3420	INS.1	-
1	39585	39585	NONE(dist=NONE),LOC114112203(dist=7170)	intergenic	185	INS.2	-
1	39935	39935	NONE(dist=NONE),LOC114112203(dist=6820)	intergenic	522	INS.3	-
1	40101	40162	NONE(dist=NONE),LOC114112203(dist=6593)	intergenic	61	DEL.2	-
1	41946	41946	NONE(dist=NONE),LOC114112203(dist=4809)	intergenic	138	INS.4	-
1	44552	54887	LOC114110836,LOC114112203	exonic	10335	DEL.3	-
1	53088	54399	LOC114110836	upstream	1311	DEL.4	-
1	58994	58994	LOC114110836(dist=6124),FAM240C(dist=58923)	intergenic	76	INS.5	-
1	60116	60116	LOC114110836(dist=7246),FAM240C(dist=57801)	intergenic	1341	INS.6	-
1	60257	60257	LOC114110836(dist=7387),FAM240C(dist=57660)	intergenic	630	INS.7	-
1	69850	69850	LOC114110836(dist=16980),FAM240C(dist=48067)	intergenic	62	INS.8	-
1	73078	73078	LOC114110836(dist=20208),FAM240C(dist=44839)	intergenic	58	INS.9	-
1	73250	73250	LOC114110836(dist=20380),FAM240C(dist=44667)	intergenic	306	INS.10	-
1	73320	73754	LOC114110836(dist=20450),FAM240C(dist=44163)	intergenic	434	DEL.5	-
1	73598	73598	LOC114110836(dist=20728),FAM240C(dist=44319)	intergenic	1830	INS.11	-
1	77926	77976	LOC114110836(dist=25056),FAM240C(dist=39941)	intergenic	50	DEL.6	-
1	78150	78216	LOC114110836(dist=25280),FAM240C(dist=39701)	intergenic	66	DEL.7	-
1	78213	78462	LOC114110836(dist=25343),FAM240C(dist=39455)	intergenic	249	DEL.8	-
1	78360	78360	LOC114110836(dist=25490),FAM240C(dist=39557)	intergenic	245	INS.12	-
1	78400	78400	LOC114110836(dist=25530),FAM240C(dist=39517)	intergenic	125	INS.13	-
1	80532	80532	LOC114110836(dist=27662),FAM240C(dist=37385)	intergenic	1293	INS.14	-
1	86908	86908	LOC114110836(dist=34038),FAM240C(dist=31009)	intergenic	1516	INS.15	-
1	102448	102670	LOC114110836(dist=49578),FAM240C(dist=15247)	intergenic	222	DEL.9	-
1	102702	102763	LOC114110836(dist=49832),FAM240C(dist=15154)	intergenic	61	DEL.10	-
1	102708	103016	LOC114110836(dist=49838),FAM240C(dist=14901)	intergenic	308	DEL.11	-
1	102733	102890	LOC114110836(dist=49863),FAM240C(dist=15027)	intergenic	157	DEL.12	-
1	102943	102943	LOC114110836(dist=50073),FAM240C(dist=14974)	intergenic	273	INS.16	-
1	102992	102992	LOC114110836(dist=50122),FAM240C(dist=14925)	intergenic	61	INS.17	-
1	119395	119465	FAM240C	intronic	70	DEL.13	-
1	131296	131296	FAM240C(dist=1824),PDCD1(dist=14717)	intergenic	86	INS.18	-
1	135061	135061	FAM240C(dist=5589),PDCD1(dist=10952)	intergenic	67	INS.19	-
1	145807	145807	PDCD1	upstream	121	INS.20	-
1	145829	145829	PDCD1	upstream	60	INS.21	-
1	156421	156421	PDCD1(XM_027964169.2:c.-18000>0,XM_042239178.1:c.-47140>0,XM_042239174.1:c.-47140>0)	UTR5	257	INS.22	-
1	164344	164449	PDCD1	intronic	105	DEL.14	-
1	165813	165863	PDCD1	intronic	50	DEL.15	-
1	169982	170066	PDCD1(dist=2444),NEU4(dist=6009)	intergenic	84	DEL.16	-
1	175891	175891	NEU4	downstream	696	INS.23	-
1	175968	175968	NEU4	downstream	377	INS.24	-
1	216979	217029	D2HGDH	intronic	50	DEL.17	-
1	217081	217181	D2HGDH	intronic	100	DEL.18	-
1	221447	221447	D2HGDH	intronic	114	INS.25	-
1	223866	223866	D2HGDH	intronic	163	INS.26	-
1	225674	225792	D2HGDH	intronic	118	DEL.19	-
1	225762	225848	D2HGDH	intronic	86	DEL.20	-
1	228599	228599	D2HGDH	intronic	131	INS.27	-
1	228634	228731	D2HGDH	intronic	97	DEL.21	-
1	242706	242706	ING5	intronic	53	INS.28	-
1	242867	242867	ING5	intronic	102	INS.29	-
1	245143	245366	ING5	intronic	223	DEL.22	-
1	245336	245402	ING5	intronic	66	DEL.23	-
1	245385	245521	ING5	intronic	136	DEL.24	-
1	295448	295498	THAP4	intronic	50	DEL.25	-
1	314423	314587	THAP4	intronic	164	DEL.26	-
1	314549	314631	THAP4	intronic	82	DEL.27	-
1	314732	314732	THAP4	intronic	246	INS.30	-
1	330082	330082	THAP4(dist=6703),BOK(dist=1959)	intergenic	54	INS.31	-
1	386807	386892	FARP2	intronic	85	DEL.28	-
1	386858	386858	FARP2	intronic	51	INS.32	-
1	386859	386909	FARP2	intronic	50	DEL.29	-
1	388237	388237	FARP2	intronic	76	INS.33	-
1	404679	404679	FARP2	intronic	61	INS.34	-
1	415318	415318	FARP2	intronic	154	INS.35	-
1	415382	415382	FARP2	intronic	157	INS.36	-
1	424634	424684	FARP2	intronic	50	DEL.30	-
1	427106	427106	FARP2	intronic	583	INS.37	-
1	427445	427445	FARP2	intronic	182	INS.38	-
1	436749	436915	FARP2	intronic	166	DEL.31	-
1	436855	436855	FARP2	intronic	166	INS.39	-
1	436978	436978	FARP2	intronic	117	INS.40	-
1	437037	437151	FARP2	intronic	114	DEL.32	-
1	437069	437069	FARP2	intronic	54	INS.41	-
1	437319	437319	FARP2	intronic	513	INS.42	-
1	483988	484596	SEPTIN2	intronic	608	DEL.33	-
1	484200	484468	SEPTIN2	intronic	268	DEL.34	-
1	484411	484596	SEPTIN2	intronic	185	DEL.35	-
1	484509	484509	SEPTIN2	intronic	144	INS.43	-
1	489282	489282	SEPTIN2	intronic	139	INS.44	-
1	489306	489306	SEPTIN2	intronic	56	INS.45	-
1	489626	489626	SEPTIN2	intronic	164	INS.46	-
1	543741	543792	LOC101101945	intronic	51	DEL.36	-
1	544329	544329	LOC101101945	intronic	93	INS.47	-
1	548894	548961	LOC101101945	intronic	67	DEL.37	-
1	570718	570803	LOC101101945(dist=4443),LOC121817697(dist=20322)	intergenic	85	DEL.38	-
1	570774	570774	LOC101101945(dist=4499),LOC121817697(dist=20351)	intergenic	88	INS.48	-
1	578861	578861	LOC101101945(dist=12586),LOC121817697(dist=12264)	intergenic	65	INS.49	-
1	582096	582514	LOC101101945(dist=15821),LOC121817697(dist=8611)	intergenic	418	DEL.39	-
1	582411	582466	LOC101101945(dist=16136),LOC121817697(dist=8659)	intergenic	55	DEL.40	-
1	582555	582555	LOC101101945(dist=16280),LOC121817697(dist=8570)	intergenic	227	INS.50	-
1	582558	582558	LOC101101945(dist=16283),LOC121817697(dist=8567)	intergenic	85	INS.51	-
1	601902	601902	PPP1R7	intronic	142	INS.52	-
1	616253	616253	PPP1R7	intronic	136	INS.53	-
1	616310	616310	PPP1R7	intronic	136	INS.54	-
1	616397	616397	PPP1R7	intronic	272	INS.55	-
1	631242	631307	LOC101102694	intronic	65	DEL.41	-
1	631280	631280	LOC101102694	intronic	63	INS.56	-
1	631296	631360	LOC101102694	intronic	64	DEL.42	-
1	634273	634273	LOC101102694	intronic	63	INS.57	-
1	634303	634427	LOC101102694	intronic	124	DEL.43	-
1	634316	634378	LOC101102694	intronic	62	DEL.44	-
1	641487	641487	LOC101102694(XM_042239481.1:c.*2370>0)	UTR3	100	INS.58	-
1	641487	641607	LOC101102694(XM_042239481.1:c.*237_*239delins0)	UTR3	120	DEL.45	-
1	641711	641711	LOC101102694	intronic	208	INS.59	-
1	648979	649283	LOC101102694	intronic	304	DEL.46	-
1	649472	649472	LOC101102694	intronic	84	INS.60	-
1	649651	650840	LOC101102694	intronic	1189	DEL.47	-
1	649663	651822	LOC101102694	intronic	2159	DEL.48	-
1	649760	651373	LOC101102694	intronic	1613	DEL.49	-
1	649867	650941	LOC101102694	intronic	1074	DEL.50	-
1	649957	650919	LOC101102694	intronic	962	DEL.51	-
1	649985	649985	LOC101102694	intronic	817	INS.61	-
1	650064	650143	LOC101102694	intronic	79	DEL.52	-
1	650202	650519	LOC101102694	intronic	317	DEL.53	-
1	650451	650565	LOC101102694	intronic	114	DEL.54	-
1	650529	651297	LOC101102694	intronic	768	DEL.55	-
1	650823	650927	LOC101102694	intronic	104	DEL.56	-
1	651002	651155	LOC101102694	intronic	153	DEL.57	-
1	651194	651194	LOC101102694	intronic	81	INS.62	-
1	651602	651602	LOC101102694	intronic	148	INS.63	-
1	651767	651767	LOC101102694	intronic	142	INS.64	-
1	651837	651837	LOC101102694	intronic	113	INS.65	-
1	670531	670531	SNED1	intronic	92	INS.66	-
1	681909	681909	SNED1	intronic	672	INS.67	-
1	681969	681969	SNED1	intronic	403	INS.68	-
1	682054	682054	SNED1	intronic	115	INS.69	-
1	682081	682171	SNED1	intronic	90	DEL.58	-
1	682110	682110	SNED1	intronic	1098	INS.70	-
1	682389	682389	SNED1	intronic	174	INS.71	-
1	682408	682464	SNED1	intronic	56	DEL.59	-
1	682577	682577	SNED1	intronic	572	INS.72	-
1	693099	693099	SNED1	intronic	85	INS.73	-
1	697092	697200	SNED1	intronic	108	DEL.60	-
1	697135	697135	SNED1	intronic	105	INS.74	-
1	743019	743079	SNED1(dist=1727),LOC121817700(dist=1889)	intergenic	60	DEL.61	-
1	757872	757932	LOC121817700(dist=7978),LOC101102952(dist=2471)	intergenic	60	DEL.62	-
1	757948	757948	LOC121817700(dist=8054),LOC101102952(dist=2455)	intergenic	402	INS.75	-
1	757999	757999	LOC121817700(dist=8105),LOC101102952(dist=2404)	intergenic	459	INS.76	-
1	765685	765846	LOC101102952	intronic	161	DEL.63	-
1	776636	776902	LOC101102952	intronic	266	DEL.64	-
1	776649	776649	LOC101102952	intronic	825	INS.77	-
1	776666	776666	LOC101102952	intronic	376	INS.78	-
1	776781	776999	LOC101102952	intronic	218	DEL.65	-
1	789853	790263	LOC101102952	intronic	410	DEL.66	-
1	790080	790080	LOC101102952	intronic	61	INS.79	-
1	790111	790111	LOC101102952	intronic	183	INS.80	-
1	802613	802613	LOC101102952	intronic	237	INS.81	-
1	802797	802797	LOC101102952	intronic	98	INS.82	-
1	804940	804940	LOC101102952	intronic	103	INS.83	-
1	811767	811767	LOC101102952	intronic	359	INS.84	-
1	811781	811781	LOC101102952	intronic	52	INS.85	-
1	813435	813435	MAB21L4	intronic	62	INS.86	-
1	819040	819040	MAB21L4	intronic	60	INS.87	-
1	827933	828072	AGXT	downstream	139	DEL.67	-
1	829796	829796	AGXT	intronic	73	INS.88	-
1	835427	835427	AGXT	intronic	5314	INS.89	-
1	835449	835449	AGXT	intronic	52	INS.90	-
1	835475	835475	AGXT	intronic	138	INS.91	-
1	835555	835555	AGXT	intronic	122	INS.92	-
1	835594	837181	AGXT	intronic	1587	DEL.68	-
1	835598	835650	AGXT	intronic	52	DEL.69	-
1	836379	836379	AGXT	intronic	70	INS.93	-
1	836390	836390	AGXT	intronic	3433	INS.94	-
1	836849	836900	AGXT	intronic	51	DEL.70	-
1	836931	837001	AGXT	intronic	70	DEL.71	-
1	837207	837207	AGXT	intronic	139	INS.95	-
1	837225	837225	AGXT	intronic	259	INS.96	-
1	837303	837512	AGXT	intronic	209	DEL.72	-
1	838673	838673	AGXT	intronic	102	INS.97	-
1	838890	839171	AGXT	intronic	281	DEL.73	-
1	839268	839268	AGXT	intronic	51	INS.98	-
1	839397	839397	AGXT	intronic	281	INS.99	-
1	839512	839512	AGXT	intronic	70	INS.100	-
1	839693	839693	AGXT	intronic	85	INS.101	-
1	839739	839790	AGXT	intronic	51	DEL.74	-
1	844328	844328	AGXT(dist=1912),KIF1A(dist=27466)	intergenic	60	INS.102	-
1	851615	851693	AGXT(dist=9199),KIF1A(dist=20101)	intergenic	78	DEL.75	-
1	875774	876025	KIF1A	intronic	251	DEL.76	-
1	886518	886518	KIF1A	intronic	80	INS.103	-
1	893023	893122	KIF1A	intronic	99	DEL.77	-
1	893234	893234	KIF1A	intronic	119	INS.104	-
1	897504	897504	KIF1A	intronic	84	INS.105	-
1	912253	912816	KIF1A	intronic	563	DEL.78	-
1	912270	912270	KIF1A	intronic	123	INS.106	-
1	912476	913198	KIF1A	intronic	722	DEL.79	-
1	912596	912918	KIF1A	intronic	322	DEL.80	-
1	912849	913378	KIF1A	intronic	529	DEL.81	-
1	913157	913157	KIF1A	intronic	85	INS.107	-
1	913429	913429	KIF1A	intronic	564	INS.108	-
1	914791	915095	KIF1A	intronic	304	DEL.82	-
1	914983	915039	KIF1A	intronic	56	DEL.83	-
1	915036	915036	KIF1A	intronic	341	INS.109	-
1	917816	917816	KIF1A	intronic	219	INS.110	-
1	917884	918004	KIF1A	intronic	120	DEL.84	-
1	918009	918126	KIF1A	intronic	117	DEL.85	-
1	918077	918227	KIF1A	intronic	150	DEL.86	-
1	918227	918227	KIF1A	intronic	68	INS.111	-
1	918721	918901	KIF1A	intronic	180	DEL.87	-
1	918723	918723	KIF1A	intronic	90	INS.112	-
1	945387	945387	KIF1A	intronic	187	INS.113	-
1	945480	945480	KIF1A	intronic	474	INS.114	-
1	945562	945710	KIF1A	intronic	148	DEL.88	-
1	945814	946002	KIF1A	intronic	188	DEL.89	-
1	945885	945885	KIF1A	intronic	130	INS.115	-
1	949454	949454	KIF1A	intronic	109	INS.116	-
1	950170	950251	KIF1A	intronic	81	DEL.90	-
1	957247	957247	KIF1A	intronic	111	INS.117	-
1	972331	972331	KIF1A(dist=10631),AQP12A(dist=2640)	intergenic	62	INS.118	-
1	973546	973966	KIF1A(dist=11846),AQP12A(dist=1005)	intergenic	420	DEL.91	-
1	973561	973659	KIF1A(dist=11861),AQP12A(dist=1312)	intergenic	98	DEL.92	-
1	973714	973799	KIF1A(dist=12014),AQP12A(dist=1172)	intergenic	85	DEL.93	-
1	974046	974046	AQP12A	upstream	448	INS.119	-
1	988555	988555	AQP12A(dist=10598),GPR35(dist=1169)	intergenic	636	INS.120	-
1	994053	994107	GPR35	intronic	54	DEL.94	-
1	994084	994139	GPR35	intronic	55	DEL.95	-
1	994323	994424	GPR35	intronic	101	DEL.96	-
1	1005147	1005147	GPR35	intronic	68	INS.121	-
1	1006046	1006046	GPR35	intronic	341	INS.122	-
1	1017476	1017671	CAPN10	intronic	195	DEL.97	-
1	1017502	1017502	CAPN10	intronic	170	INS.123	-
1	1017587	1017648	CAPN10	intronic	61	DEL.98	-
1	1038401	1038401	RNPEPL1	intronic	64	INS.124	-
1	1062221	1062221	ANKMY1	intronic	73	INS.125	-
1	1062230	1062230	ANKMY1	intronic	175	INS.126	-
1	1074988	1074988	ANKMY1	intronic	170	INS.127	-
1	1074999	1075084	ANKMY1	intronic	85	DEL.99	-
1	1075077	1075247	ANKMY1	intronic	170	DEL.100	-
1	1108097	1108193	GPC1	intronic	96	DEL.101	-
1	1118479	1118639	GPC1	intronic	160	DEL.102	-
1	1124103	1124157	GPC1	intronic	54	DEL.103	-
1	1129801	1130045	GPC1	intronic	244	DEL.104	-
1	1129827	1129949	GPC1	intronic	122	DEL.105	-
1	1129888	1129949	GPC1	intronic	61	DEL.106	-
1	1179049	1179110	GPC1(dist=44981),OTOS(dist=147697)	intergenic	61	DEL.107	-
1	1179194	1179194	GPC1(dist=45126),OTOS(dist=147613)	intergenic	265	INS.128	-
1	1179381	1179381	GPC1(dist=45313),OTOS(dist=147426)	intergenic	339	INS.129	-
1	1185962	1187848	GPC1(dist=51894),OTOS(dist=138959)	intergenic	1886	DEL.108	-
1	1197043	1197043	GPC1(dist=62975),OTOS(dist=129764)	intergenic	121	INS.130	-
1	1207314	1207314	GPC1(dist=73246),OTOS(dist=119493)	intergenic	92	INS.131	-
1	1208512	1208575	GPC1(dist=74444),OTOS(dist=118232)	intergenic	63	DEL.109	-
1	1208728	1208806	GPC1(dist=74660),OTOS(dist=118001)	intergenic	78	DEL.110	-
1	1245726	1245791	GPC1(dist=111658),OTOS(dist=81016)	intergenic	65	DEL.111	-
1	1245752	1245948	GPC1(dist=111684),OTOS(dist=80859)	intergenic	196	DEL.112	-
1	1284159	1284269	GPC1(dist=150091),OTOS(dist=42538)	intergenic	110	DEL.113	-
1	1284172	1284436	GPC1(dist=150104),OTOS(dist=42371)	intergenic	264	DEL.114	-
1	1284362	1284362	GPC1(dist=150294),OTOS(dist=42445)	intergenic	317	INS.132	-
1	1290588	1291268	GPC1(dist=156520),OTOS(dist=35539)	intergenic	680	DEL.115	-
1	1299725	1299725	GPC1(dist=165657),OTOS(dist=27082)	intergenic	1372	INS.133	-
1	1317136	1317136	GPC1(dist=183068),OTOS(dist=9671)	intergenic	62	INS.134	-
1	1321295	1322032	GPC1(dist=187227),OTOS(dist=4775)	intergenic	737	DEL.116	-
1	1342885	1342885	COPS9(dist=3727),LOC105611997(dist=7575)	intergenic	99	INS.135	-
1	1354144	1354144	LOC105611997(dist=2685),LOC101105206(dist=7118)	intergenic	336	INS.136	-
1	1386241	1386292	LOC101105463(dist=10513),LOC101105712(dist=8425)	intergenic	51	DEL.117	-
1	1409400	1410795	LOC101105712(dist=13733),LOC101106226(dist=6159)	intergenic	1395	DEL.118	-
1	1439624	1439952	LOC101106226(dist=21720),LOC105614374(dist=5357)	intergenic	328	DEL.119	-
1	1463701	1463701	LOC105614374(dist=17442),LOC106990790(dist=4084)	intergenic	3346	INS.137	-
1	1481278	1481278	LOC106990790(dist=12543),LOC101119544(dist=3681)	intergenic	66	INS.138	-
1	1486396	1486396	LOC101119544	downstream	1319	INS.139	-
1	1491386	1493482	LOC101119544(dist=5489),LOC101119802(dist=11877)	intergenic	2096	DEL.120	-
1	1518971	1526699	LOC101119802(dist=12662),LOC101106484(dist=42353)	intergenic	7728	DEL.121	-
1	1537498	1537901	LOC101119802(dist=31189),LOC101106484(dist=31151)	intergenic	403	DEL.122	-
1	1538701	1538701	LOC101119802(dist=32392),LOC101106484(dist=30351)	intergenic	75	INS.140	-
1	1559940	1559940	LOC101119802(dist=53631),LOC101106484(dist=9112)	intergenic	2056	INS.141	-
1	1599819	1599819	LOC101106990(dist=1991),LOC101107492(dist=62407)	intergenic	54	INS.142	-
1	1617234	1621729	LOC101106990(dist=19406),LOC101107492(dist=40497)	intergenic	4495	DEL.123	-
1	1630384	1630384	LOC101106990(dist=32556),LOC101107492(dist=31842)	intergenic	3127	INS.143	-
1	1637813	1637956	LOC101106990(dist=39985),LOC101107492(dist=24270)	intergenic	143	DEL.124	-
1	1681976	1681976	LOC114112937(dist=10639),LOC101107754(dist=8296)	intergenic	63	INS.144	-
1	1683805	1684079	LOC114112937(dist=12468),LOC101107754(dist=6193)	intergenic	274	DEL.125	-
1	1689107	1689107	LOC114112937(dist=17770),LOC101107754(dist=1165)	intergenic	204	INS.145	-
1	1689140	1689140	LOC114112937(dist=17803),LOC101107754(dist=1132)	intergenic	67	INS.146	-
1	1689193	1689318	LOC101107754	upstream	125	DEL.126	-
1	1689214	1689318	LOC101107754	upstream	104	DEL.127	-
1	1689304	1689367	LOC101107754	upstream	63	DEL.128	-
1	1702471	1702471	NDUFA10	intronic	211	INS.147	-
1	1702472	1702472	NDUFA10	intronic	428	INS.148	-
1	1706379	1706379	LOC121818744	exonic	238	INS.149	-
1	1706385	1706544	LOC121818744	exonic	159	DEL.129	-
1	1706427	1706665	LOC121818744	exonic	238	DEL.130	-
1	1706465	1706544	LOC121818744,NDUFA10	intronic	79	DEL.131	-
1	1714198	1714198	NDUFA10	intronic	90	INS.150	-
1	1714318	1714371	NDUFA10	intronic	53	DEL.132	-
1	1720024	1720126	NDUFA10	intronic	102	DEL.133	-
1	1720148	1720199	NDUFA10	intronic	51	DEL.134	-
1	1720228	1720228	NDUFA10	intronic	102	INS.151	-
1	1737024	1737024	NDUFA10(dist=1068),HDAC4(dist=383894)	intergenic	392	INS.152	-
1	1738782	1787702	NDUFA10(dist=2826),HDAC4(dist=333216)	intergenic	48920	DEL.135	-
1	1744409	1744487	NDUFA10(dist=8453),HDAC4(dist=376431)	intergenic	78	DEL.136	-
1	1744504	1744557	NDUFA10(dist=8548),HDAC4(dist=376361)	intergenic	53	DEL.137	-
1	1744663	1744663	NDUFA10(dist=8707),HDAC4(dist=376255)	intergenic	245	INS.153	-
1	1744791	1744791	NDUFA10(dist=8835),HDAC4(dist=376127)	intergenic	75	INS.154	-
1	1751789	1751789	NDUFA10(dist=15833),HDAC4(dist=369129)	intergenic	895	INS.155	-
1	1776796	1776796	NDUFA10(dist=40840),HDAC4(dist=344122)	intergenic	108	INS.156	-
1	1778997	1779054	NDUFA10(dist=43041),HDAC4(dist=341864)	intergenic	57	DEL.138	-
1	1779001	1779001	NDUFA10(dist=43045),HDAC4(dist=341917)	intergenic	340	INS.157	-
1	1791416	1791568	NDUFA10(dist=55460),HDAC4(dist=329350)	intergenic	152	DEL.139	-
1	1791432	1791432	NDUFA10(dist=55476),HDAC4(dist=329486)	intergenic	60	INS.158	-
1	1791455	1791455	NDUFA10(dist=55499),HDAC4(dist=329463)	intergenic	300	INS.159	-
1	1791458	1791458	NDUFA10(dist=55502),HDAC4(dist=329460)	intergenic	156	INS.160	-
1	1791474	1791678	NDUFA10(dist=55518),HDAC4(dist=329240)	intergenic	204	DEL.140	-
1	1791667	1791667	NDUFA10(dist=55711),HDAC4(dist=329251)	intergenic	763	INS.161	-
1	1802968	1803156	NDUFA10(dist=67012),HDAC4(dist=317762)	intergenic	188	DEL.141	-
1	1802989	1803049	NDUFA10(dist=67033),HDAC4(dist=317869)	intergenic	60	DEL.142	-
1	1803111	1803298	NDUFA10(dist=67155),HDAC4(dist=317620)	intergenic	187	DEL.143	-
1	1803177	1803177	NDUFA10(dist=67221),HDAC4(dist=317741)	intergenic	87	INS.162	-
1	1803277	1803277	NDUFA10(dist=67321),HDAC4(dist=317641)	intergenic	288	INS.163	-
1	1813331	1813331	NDUFA10(dist=77375),HDAC4(dist=307587)	intergenic	533	INS.164	-
1	1820022	1820607	NDUFA10(dist=84066),HDAC4(dist=300311)	intergenic	585	DEL.144	-
1	1844548	1844548	NDUFA10(dist=108592),HDAC4(dist=276370)	intergenic	60	INS.165	-
1	1849766	1849766	NDUFA10(dist=113810),HDAC4(dist=271152)	intergenic	132	INS.166	-
1	1858054	1858054	NDUFA10(dist=122098),HDAC4(dist=262864)	intergenic	312	INS.167	-
1	1858085	1858085	NDUFA10(dist=122129),HDAC4(dist=262833)	intergenic	160	INS.168	-
1	1859557	1859557	NDUFA10(dist=123601),HDAC4(dist=261361)	intergenic	113	INS.169	-
1	1863436	1863509	NDUFA10(dist=127480),HDAC4(dist=257409)	intergenic	73	DEL.145	-
1	1863533	1863607	NDUFA10(dist=127577),HDAC4(dist=257311)	intergenic	74	DEL.146	-
1	1868692	1868692	NDUFA10(dist=132736),HDAC4(dist=252226)	intergenic	424	INS.170	-
1	1869309	1869309	NDUFA10(dist=133353),HDAC4(dist=251609)	intergenic	80	INS.171	-
1	1894813	1894813	NDUFA10(dist=158857),HDAC4(dist=226105)	intergenic	248	INS.172	-
1	1907485	1907485	NDUFA10(dist=171529),HDAC4(dist=213433)	intergenic	113	INS.173	-
1	1907492	1907492	NDUFA10(dist=171536),HDAC4(dist=213426)	intergenic	726	INS.174	-
1	1923228	1923228	NDUFA10(dist=187272),HDAC4(dist=197690)	intergenic	140	INS.175	-
1	1923258	1923258	NDUFA10(dist=187302),HDAC4(dist=197660)	intergenic	56	INS.176	-
1	1932065	1932121	NDUFA10(dist=196109),HDAC4(dist=188797)	intergenic	56	DEL.147	-
1	1932115	1932208	NDUFA10(dist=196159),HDAC4(dist=188710)	intergenic	93	DEL.148	-
1	1945788	1945788	NDUFA10(dist=209832),HDAC4(dist=175130)	intergenic	308	INS.177	-
1	1948508	1948508	NDUFA10(dist=212552),HDAC4(dist=172410)	intergenic	54	INS.178	-
1	1948539	1948539	NDUFA10(dist=212583),HDAC4(dist=172379)	intergenic	233	INS.179	-
1	1948608	1948608	NDUFA10(dist=212652),HDAC4(dist=172310)	intergenic	233	INS.180	-
1	1979334	1979334	NDUFA10(dist=243378),HDAC4(dist=141584)	intergenic	104	INS.181	-
1	1979369	1979369	NDUFA10(dist=243413),HDAC4(dist=141549)	intergenic	172	INS.182	-
1	1992254	1992254	NDUFA10(dist=256298),HDAC4(dist=128664)	intergenic	93	INS.183	-
1	1996365	1996365	NDUFA10(dist=260409),HDAC4(dist=124553)	intergenic	364	INS.184	-
1	2002659	2002807	NDUFA10(dist=266703),HDAC4(dist=118111)	intergenic	148	DEL.149	-
1	2003530	2003644	NDUFA10(dist=267574),HDAC4(dist=117274)	intergenic	114	DEL.150	-
1	2008175	2008175	NDUFA10(dist=272219),HDAC4(dist=112743)	intergenic	94	INS.185	-
1	2016023	2016023	NDUFA10(dist=280067),HDAC4(dist=104895)	intergenic	69	INS.186	-
1	2021230	2021230	NDUFA10(dist=285274),HDAC4(dist=99688)	intergenic	3657	INS.187	-
1	2029788	2029788	NDUFA10(dist=293832),HDAC4(dist=91130)	intergenic	6566	INS.188	-
1	2096786	2096786	NDUFA10(dist=360830),HDAC4(dist=24132)	intergenic	63	INS.189	-
1	2096787	2096850	NDUFA10(dist=360831),HDAC4(dist=24068)	intergenic	63	DEL.151	-
1	2096828	2096891	NDUFA10(dist=360872),HDAC4(dist=24027)	intergenic	63	DEL.152	-
1	2096852	2096852	NDUFA10(dist=360896),HDAC4(dist=24066)	intergenic	124	INS.190	-
1	2104681	2104823	NDUFA10(dist=368725),HDAC4(dist=16095)	intergenic	142	DEL.153	-
1	2141025	2141025	HDAC4	intronic	126	INS.191	-
1	2141741	2141741	HDAC4	intronic	116	INS.192	-
1	2149858	2149858	HDAC4	intronic	286	INS.193	-
1	2149921	2149921	HDAC4	intronic	142	INS.194	-
1	2150274	2150383	HDAC4	intronic	109	DEL.154	-
1	2150348	2150348	HDAC4	intronic	107	INS.195	-
1	2151494	2151846	HDAC4	intronic	352	DEL.155	-
1	2151656	2151656	HDAC4	intronic	82	INS.196	-
1	2151703	2151703	HDAC4	intronic	1008	INS.197	-
1	2151981	2151981	HDAC4	intronic	311	INS.198	-
1	2156795	2156795	HDAC4	intronic	413	INS.199	-
1	2157077	2157077	HDAC4	intronic	59	INS.200	-
1	2166215	2166215	HDAC4	intronic	278	INS.201	-
1	2179806	2179806	HDAC4	intronic	137	INS.202	-
1	2181620	2181620	HDAC4	intronic	147	INS.203	-
1	2205952	2205952	HDAC4	intronic	180	INS.204	-
1	2206053	2206053	HDAC4	intronic	669	INS.205	-
1	2206652	2206724	HDAC4	intronic	72	DEL.156	-
1	2210353	2210353	HDAC4	intronic	82	INS.206	-
1	2214051	2214051	HDAC4	intronic	131	INS.207	-
1	2215197	2215533	HDAC4	intronic	336	DEL.157	-
1	2215487	2215487	HDAC4	intronic	50	INS.208	-
1	2231660	2231660	HDAC4	intronic	484	INS.209	-
1	2231682	2231682	HDAC4	intronic	82	INS.210	-
1	2231990	2231990	HDAC4	intronic	184	INS.211	-
1	2270667	2270771	HDAC4	intronic	104	DEL.158	-
1	2272443	2272504	HDAC4	intronic	61	DEL.159	-
1	2272487	2272558	HDAC4	intronic	71	DEL.160	-
1	2272594	2272594	HDAC4	intronic	55	INS.212	-
1	2272760	2272760	HDAC4	intronic	61	INS.213	-
1	2280899	2281243	HDAC4	intronic	344	DEL.161	-
1	2281231	2281231	HDAC4	intronic	274	INS.214	-
1	2281337	2281337	HDAC4	intronic	54	INS.215	-
1	2291798	2291798	HDAC4	intronic	78	INS.216	-
1	2293747	2293747	HDAC4	intronic	57	INS.217	-
1	2295983	2295983	HDAC4	intronic	194	INS.218	-
1	2296048	2296048	HDAC4	intronic	91	INS.219	-
1	2298497	2298549	HDAC4	intronic	52	DEL.162	-
1	2298526	2298526	HDAC4	intronic	104	INS.220	-
1	2301923	2301923	HDAC4	intronic	145	INS.221	-
1	2301982	2301982	HDAC4	intronic	165	INS.222	-
1	2306011	2306011	HDAC4	intronic	122	INS.223	-
1	2306016	2306016	HDAC4	intronic	340	INS.224	-
1	2306822	2306822	HDAC4	intronic	101	INS.225	-
1	2308178	2308178	HDAC4	intronic	58	INS.226	-
1	2320059	2320059	HDAC4	intronic	225	INS.227	-
1	2320206	2320206	HDAC4	intronic	103	INS.228	-
1	2323205	2323205	HDAC4	intronic	75	INS.229	-
1	2329836	2329836	HDAC4	intronic	104	INS.230	-
1	2330485	2330621	HDAC4	intronic	136	DEL.163	-
1	2330633	2331117	HDAC4	intronic	484	DEL.164	-
1	2330882	2330882	HDAC4	intronic	1035	INS.231	-
1	2330914	2331593	HDAC4	intronic	679	DEL.165	-
1	2331126	2331386	HDAC4	intronic	260	DEL.166	-
1	2331504	2331570	HDAC4	intronic	66	DEL.167	-
1	2331625	2331625	HDAC4	intronic	403	INS.232	-
1	2342541	2342541	HDAC4	intronic	93	INS.233	-
1	2359528	2359528	HDAC4	intronic	60	INS.234	-
1	2359908	2359963	HDAC4	intronic	55	DEL.168	-
1	2359972	2360027	HDAC4	intronic	55	DEL.169	-
1	2366352	2366606	HDAC4	intronic	254	DEL.170	-
1	2366566	2366566	HDAC4	intronic	679	INS.235	-
1	2366602	2366693	HDAC4	intronic	91	DEL.171	-
1	2366603	2367240	HDAC4	intronic	637	DEL.172	-
1	2367237	2367370	HDAC4	intronic	133	DEL.173	-
1	2367403	2367403	HDAC4	intronic	176	INS.236	-
1	2367612	2367809	HDAC4	intronic	197	DEL.174	-
1	2385302	2385302	HDAC4	intronic	1514	INS.237	-
1	2385768	2385768	HDAC4	intronic	199	INS.238	-
1	2386274	2386385	HDAC4	intronic	111	DEL.175	-
1	2386592	2386652	HDAC4	intronic	60	DEL.176	-
1	2401611	2401611	HDAC4	intronic	68	INS.239	-
1	2418084	2418084	HDAC4(dist=7150),TWIST2(dist=105878)	intergenic	83	INS.240	-
1	2431468	2431648	HDAC4(dist=20534),TWIST2(dist=92314)	intergenic	180	DEL.177	-
1	2433608	2433686	HDAC4(dist=22674),TWIST2(dist=90276)	intergenic	78	DEL.178	-
1	2433633	2433633	HDAC4(dist=22699),TWIST2(dist=90329)	intergenic	78	INS.241	-
1	2433637	2433637	HDAC4(dist=22703),TWIST2(dist=90325)	intergenic	156	INS.242	-
1	2445889	2446126	HDAC4(dist=34955),TWIST2(dist=77836)	intergenic	237	DEL.179	-
1	2455208	2455208	HDAC4(dist=44274),TWIST2(dist=68754)	intergenic	1298	INS.243	-
1	2466339	2466339	HDAC4(dist=55405),TWIST2(dist=57623)	intergenic	1517	INS.244	-
1	2472654	2472654	HDAC4(dist=61720),TWIST2(dist=51308)	intergenic	84	INS.245	-
1	2477028	2477202	HDAC4(dist=66094),TWIST2(dist=46760)	intergenic	174	DEL.180	-
1	2486200	2486294	HDAC4(dist=75266),TWIST2(dist=37668)	intergenic	94	DEL.181	-
1	2490621	2490748	HDAC4(dist=79687),TWIST2(dist=33214)	intergenic	127	DEL.182	-
1	2505943	2505943	HDAC4(dist=95009),TWIST2(dist=18019)	intergenic	66	INS.246	-
1	2508750	2508750	HDAC4(dist=97816),TWIST2(dist=15212)	intergenic	213	INS.247	-
1	2525626	2525680	TWIST2	intronic	54	DEL.183	-
1	2526980	2526980	TWIST2	intronic	130	INS.248	-
1	2527076	2527076	TWIST2	intronic	551	INS.249	-
1	2528154	2528154	TWIST2	intronic	67	INS.250	-
1	2528607	2528607	TWIST2	intronic	55	INS.251	-
1	2538496	2538496	TWIST2	intronic	2026	INS.252	-
1	2546696	2546764	TWIST2	intronic	68	DEL.184	-
1	2547215	2547215	TWIST2	intronic	404	INS.253	-
1	2547280	2547280	TWIST2	intronic	94	INS.254	-
1	2548752	2548752	TWIST2	intronic	66	INS.255	-
1	2598965	2598965	TWIST2(dist=22161),ASB1(dist=295099)	intergenic	69	INS.256	-
1	2608480	2608480	TWIST2(dist=31676),ASB1(dist=285584)	intergenic	69	INS.257	-
1	2609034	2609225	TWIST2(dist=32230),ASB1(dist=284839)	intergenic	191	DEL.185	-
1	2609053	2609116	TWIST2(dist=32249),ASB1(dist=284948)	intergenic	63	DEL.186	-
1	2636092	2636092	TWIST2(dist=59288),ASB1(dist=257972)	intergenic	137	INS.258	-
1	2653433	2653433	TWIST2(dist=76629),ASB1(dist=240631)	intergenic	90	INS.259	-
1	2676038	2676253	TWIST2(dist=99234),ASB1(dist=217811)	intergenic	215	DEL.187	-
1	2697280	2697380	TWIST2(dist=120476),ASB1(dist=196684)	intergenic	100	DEL.188	-
1	2698887	2698989	TWIST2(dist=122083),ASB1(dist=195075)	intergenic	102	DEL.189	-
1	2701675	2701739	TWIST2(dist=124871),ASB1(dist=192325)	intergenic	64	DEL.190	-
1	2752424	2752543	TWIST2(dist=175620),ASB1(dist=141521)	intergenic	119	DEL.191	-
1	2752597	2753142	TWIST2(dist=175793),ASB1(dist=140922)	intergenic	545	DEL.192	-
1	2752955	2752955	TWIST2(dist=176151),ASB1(dist=141109)	intergenic	898	INS.260	-
1	2753143	2753143	TWIST2(dist=176339),ASB1(dist=140921)	intergenic	544	INS.261	-
1	2753506	2754056	TWIST2(dist=176702),ASB1(dist=140008)	intergenic	550	DEL.193	-
1	2753652	2753730	TWIST2(dist=176848),ASB1(dist=140334)	intergenic	78	DEL.194	-
1	2800191	2800242	TWIST2(dist=223387),ASB1(dist=93822)	intergenic	51	DEL.195	-
1	2816471	2816555	TWIST2(dist=239667),ASB1(dist=77509)	intergenic	84	DEL.196	-
1	2816688	2817756	TWIST2(dist=239884),ASB1(dist=76308)	intergenic	1068	DEL.197	-
1	2816713	2816713	TWIST2(dist=239909),ASB1(dist=77351)	intergenic	819	INS.262	-
1	2816719	2816782	TWIST2(dist=239915),ASB1(dist=77282)	intergenic	63	DEL.198	-
1	2817595	2817595	TWIST2(dist=240791),ASB1(dist=76469)	intergenic	1761	INS.263	-
1	2818269	2818269	TWIST2(dist=241465),ASB1(dist=75795)	intergenic	426	INS.264	-
1	2822557	2823021	TWIST2(dist=245753),ASB1(dist=71043)	intergenic	464	DEL.199	-
1	2822558	2822662	TWIST2(dist=245754),ASB1(dist=71402)	intergenic	104	DEL.200	-
1	2822734	2823595	TWIST2(dist=245930),ASB1(dist=70469)	intergenic	861	DEL.201	-
1	2822980	2823594	TWIST2(dist=246176),ASB1(dist=70470)	intergenic	614	DEL.202	-
1	2823117	2823117	TWIST2(dist=246313),ASB1(dist=70947)	intergenic	851	INS.265	-
1	2833310	2834195	TWIST2(dist=256506),ASB1(dist=59869)	intergenic	885	DEL.203	-
1	2840181	2840886	TWIST2(dist=263377),ASB1(dist=53178)	intergenic	705	DEL.204	-
1	2840217	2841450	TWIST2(dist=263413),ASB1(dist=52614)	intergenic	1233	DEL.205	-
1	2840375	2840375	TWIST2(dist=263571),ASB1(dist=53689)	intergenic	2893	INS.266	-
1	2841287	2841287	TWIST2(dist=264483),ASB1(dist=52777)	intergenic	72	INS.267	-
1	2841403	2842068	TWIST2(dist=264599),ASB1(dist=51996)	intergenic	665	DEL.206	-
1	2841555	2842073	TWIST2(dist=264751),ASB1(dist=51991)	intergenic	518	DEL.207	-
1	2841664	2841999	TWIST2(dist=264860),ASB1(dist=52065)	intergenic	335	DEL.208	-
1	2843579	2843579	TWIST2(dist=266775),ASB1(dist=50485)	intergenic	98	INS.268	-
1	2845679	2845679	TWIST2(dist=268875),ASB1(dist=48385)	intergenic	188	INS.269	-
1	2864543	2864627	TWIST2(dist=287739),ASB1(dist=29437)	intergenic	84	DEL.209	-
1	2923476	2923550	ASB1(dist=5409),TRAF3IP1(dist=12501)	intergenic	74	DEL.210	-
1	2939051	2939051	TRAF3IP1	intronic	63	INS.270	-
1	2939639	2939700	TRAF3IP1	intronic	61	DEL.211	-
1	2939670	2939731	TRAF3IP1	intronic	61	DEL.212	-
1	2982372	2982372	TRAF3IP1	intronic	171	INS.271	-
1	2982700	2982885	TRAF3IP1	intronic	185	DEL.213	-
1	2983135	2983211	TRAF3IP1	intronic	76	DEL.214	-
1	2998748	2998910	TRAF3IP1(dist=1466),PER2(dist=42153)	intergenic	162	DEL.215	-
1	3012255	3012255	TRAF3IP1(dist=14973),PER2(dist=28808)	intergenic	64	INS.272	-
1	3025656	3025656	TRAF3IP1(dist=28374),PER2(dist=15407)	intergenic	1013	INS.273	-
1	3048718	3048718	PER2	intronic	291	INS.274	-
1	3053237	3053318	PER2	intronic	81	DEL.216	-
1	3069472	3069574	PER2	intronic	102	DEL.217	-
1	3073106	3073190	PER2	intronic	84	DEL.218	-
1	3073243	3073451	PER2	intronic	208	DEL.219	-
1	3073347	3073451	PER2	intronic	104	DEL.220	-
1	3101826	3104169	HES6(dist=14200),LOC101109322(dist=9393)	intergenic	2343	DEL.221	-
1	3108424	3108424	HES6(dist=20798),LOC101109322(dist=5138)	intergenic	104	INS.275	-
1	3117642	3117642	LOC101109322	intronic	50	INS.276	-
1	3162442	3162442	KLHL30	intronic	52	INS.277	-
1	3162480	3162534	KLHL30	intronic	54	DEL.222	-
1	3168623	3168623	KLHL30(dist=2304),ESPNL(dist=3189)	intergenic	61	INS.278	-
1	3185645	3192272	ESPNL	intronic	6627	DEL.223	-
1	3196649	3196709	ESPNL	intronic	60	DEL.224	-
1	3202382	3202474	ESPNL	intronic	92	DEL.225	-
1	3202486	3202486	ESPNL	intronic	73	INS.279	-
1	3215446	3215446	SCLY	intronic	61	INS.280	-
1	3215531	3215531	SCLY	intronic	120	INS.281	-
1	3234065	3234065	SCLY	intronic	94	INS.282	-
1	3308969	3308969	UBE2F(dist=15501),RAMP1(dist=15572)	intergenic	160	INS.283	-
1	3323656	3323656	RAMP1	downstream	1360	INS.284	-
1	3365558	3365558	RAMP1	intronic	174	INS.285	-
1	3365618	3365704	RAMP1	intronic	86	DEL.226	-
1	3365655	3365769	RAMP1	intronic	114	DEL.227	-
1	3369429	3369429	RAMP1(dist=3109),RBM44(dist=12341)	intergenic	57	INS.286	-
1	3369439	3369496	RAMP1(dist=3119),RBM44(dist=12274)	intergenic	57	DEL.228	-
1	3487880	3487880	LRRFIP1	intronic	67	INS.287	-
1	3489472	3489472	LRRFIP1	intronic	56	INS.288	-
1	3506657	3506657	LRRFIP1	intronic	192	INS.289	-
1	3506701	3506701	LRRFIP1	intronic	90	INS.290	-
1	3626106	3626106	RAB17	intronic	933	INS.291	-
1	3626174	3626174	RAB17	intronic	3260	INS.292	-
1	3626176	3626176	RAB17	intronic	463	INS.293	-
1	3644927	3644927	MLPH	downstream	80	INS.294	-
1	3651862	3651862	MLPH	intronic	181	INS.295	-
1	3651884	3651884	MLPH	intronic	344	INS.296	-
1	3652070	3652070	MLPH	intronic	194	INS.297	-
1	3657784	3657784	MLPH	intronic	776	INS.298	-
1	3659593	3659649	MLPH	intronic	56	DEL.229	-
1	3663602	3663845	MLPH	intronic	243	DEL.230	-
1	3665408	3665481	MLPH	intronic	73	DEL.231	-
1	3680167	3680167	MLPH	intronic	221	INS.299	-
1	3720574	3720574	MLPH(dist=28518),COL6A3(dist=57348)	intergenic	320	INS.300	-
1	3748367	3748367	MLPH(dist=56311),COL6A3(dist=29555)	intergenic	62	INS.301	-
1	3751890	3751966	MLPH(dist=59834),COL6A3(dist=25956)	intergenic	76	DEL.232	-
1	3756715	3756715	MLPH(dist=64659),COL6A3(dist=21207)	intergenic	283	INS.302	-
1	3819554	3819554	COL6A3	intronic	53	INS.303	-
1	3924894	3924894	COL6A3(dist=53781),TRNAC-ACA(dist=119892)	intergenic	239	INS.304	-
1	3928188	3928188	COL6A3(dist=57075),TRNAC-ACA(dist=116598)	intergenic	117	INS.305	-
1	3937145	3937145	COL6A3(dist=66032),TRNAC-ACA(dist=107641)	intergenic	167	INS.306	-
1	3938164	3938821	COL6A3(dist=67051),TRNAC-ACA(dist=105965)	intergenic	657	DEL.233	-
1	3970597	3970740	COL6A3(dist=99484),TRNAC-ACA(dist=74046)	intergenic	143	DEL.234	-
1	3970673	3970816	COL6A3(dist=99560),TRNAC-ACA(dist=73970)	intergenic	143	DEL.235	-
1	3975053	3975607	COL6A3(dist=103940),TRNAC-ACA(dist=69179)	intergenic	554	DEL.236	-
1	3976365	3976760	COL6A3(dist=105252),TRNAC-ACA(dist=68026)	intergenic	395	DEL.237	-
1	3988469	3988469	COL6A3(dist=117356),TRNAC-ACA(dist=56317)	intergenic	146	INS.307	-
1	3998954	3998954	COL6A3(dist=127841),TRNAC-ACA(dist=45832)	intergenic	108	INS.308	-
1	4019590	4019656	COL6A3(dist=148477),TRNAC-ACA(dist=25130)	intergenic	66	DEL.238	-
1	4024761	4028843	COL6A3(dist=153648),TRNAC-ACA(dist=15943)	intergenic	4082	DEL.239	-
1	4027325	4027325	COL6A3(dist=156212),TRNAC-ACA(dist=17461)	intergenic	3682	INS.309	-
1	4042095	4042175	COL6A3(dist=170982),TRNAC-ACA(dist=2611)	intergenic	80	DEL.240	-
1	4042734	4042734	COL6A3(dist=171621),TRNAC-ACA(dist=2052)	intergenic	100	INS.310	-
1	4055287	4055373	TRNAC-ACA(dist=10430),COPS8(dist=42630)	intergenic	86	DEL.241	-
1	4067234	4068052	TRNAC-ACA(dist=22377),COPS8(dist=29951)	intergenic	818	DEL.242	-
1	4079212	4079548	TRNAC-ACA(dist=34355),COPS8(dist=18455)	intergenic	336	DEL.243	-
1	4084766	4084766	TRNAC-ACA(dist=39909),COPS8(dist=13237)	intergenic	64	INS.311	-
1	4127124	4127124	COPS8(dist=16155),TRNAC-ACA(dist=215375)	intergenic	592	INS.312	-
1	4127161	4127286	COPS8(dist=16192),TRNAC-ACA(dist=215213)	intergenic	125	DEL.244	-
1	4180288	4180288	COPS8(dist=69319),TRNAC-ACA(dist=162211)	intergenic	149	INS.313	-
1	4233161	4233161	COPS8(dist=122192),TRNAC-ACA(dist=109338)	intergenic	141	INS.314	-
1	4244565	4244708	COPS8(dist=133596),TRNAC-ACA(dist=97791)	intergenic	143	DEL.245	-
1	4307827	4307827	COPS8(dist=196858),TRNAC-ACA(dist=34672)	intergenic	61	INS.315	-
1	4356098	4356098	TRNAC-ACA(dist=13528),ACKR3(dist=266445)	intergenic	194	INS.316	-
1	4368972	4369062	TRNAC-ACA(dist=26402),ACKR3(dist=253481)	intergenic	90	DEL.246	-
1	4372415	4372415	TRNAC-ACA(dist=29845),ACKR3(dist=250128)	intergenic	768	INS.317	-
1	4372572	4372572	TRNAC-ACA(dist=30002),ACKR3(dist=249971)	intergenic	55	INS.318	-
1	4372809	4373007	TRNAC-ACA(dist=30239),ACKR3(dist=249536)	intergenic	198	DEL.247	-
1	4372936	4373004	TRNAC-ACA(dist=30366),ACKR3(dist=249539)	intergenic	68	DEL.248	-
1	4372964	4372964	TRNAC-ACA(dist=30394),ACKR3(dist=249579)	intergenic	2610	INS.319	-
1	4373442	4373442	TRNAC-ACA(dist=30872),ACKR3(dist=249101)	intergenic	4216	INS.320	-
1	4373846	4373915	TRNAC-ACA(dist=31276),ACKR3(dist=248628)	intergenic	69	DEL.249	-
1	4374480	4374480	TRNAC-ACA(dist=31910),ACKR3(dist=248063)	intergenic	177	INS.321	-
1	4381722	4381833	TRNAC-ACA(dist=39152),ACKR3(dist=240710)	intergenic	111	DEL.250	-
1	4411641	4411641	TRNAC-ACA(dist=69071),ACKR3(dist=210902)	intergenic	143	INS.322	-
1	4442280	4442280	TRNAC-ACA(dist=99710),ACKR3(dist=180263)	intergenic	388	INS.323	-
1	4442366	4442366	TRNAC-ACA(dist=99796),ACKR3(dist=180177)	intergenic	58	INS.324	-
1	4442425	4442556	TRNAC-ACA(dist=99855),ACKR3(dist=179987)	intergenic	131	DEL.251	-
1	4442875	4442875	TRNAC-ACA(dist=100305),ACKR3(dist=179668)	intergenic	156	INS.325	-
1	4500151	4500151	TRNAC-ACA(dist=157581),ACKR3(dist=122392)	intergenic	601	INS.326	-
1	4521694	4521694	TRNAC-ACA(dist=179124),ACKR3(dist=100849)	intergenic	274	INS.327	-
1	4521967	4521967	TRNAC-ACA(dist=179397),ACKR3(dist=100576)	intergenic	202	INS.328	-
1	4521977	4521977	TRNAC-ACA(dist=179407),ACKR3(dist=100566)	intergenic	100	INS.329	-
1	4529263	4529263	TRNAC-ACA(dist=186693),ACKR3(dist=93280)	intergenic	75	INS.330	-
1	4556884	4556884	TRNAC-ACA(dist=214314),ACKR3(dist=65659)	intergenic	98	INS.331	-
1	4565945	4565945	TRNAC-ACA(dist=223375),ACKR3(dist=56598)	intergenic	356	INS.332	-
1	4568960	4569094	TRNAC-ACA(dist=226390),ACKR3(dist=53449)	intergenic	134	DEL.252	-
1	4600835	4600835	TRNAC-ACA(dist=258265),ACKR3(dist=21708)	intergenic	62	INS.333	-
1	4600903	4601027	TRNAC-ACA(dist=258333),ACKR3(dist=21516)	intergenic	124	DEL.253	-
1	4603159	4603159	TRNAC-ACA(dist=260589),ACKR3(dist=19384)	intergenic	486	INS.334	-
1	4626969	4626969	ACKR3	intronic	378	INS.335	-
1	4628171	4628171	ACKR3	intronic	72	INS.336	-
1	4638139	4638139	ACKR3(dist=3070),IQCA1(dist=54168)	intergenic	119	INS.337	-
1	4654020	4656724	ACKR3(dist=18951),IQCA1(dist=35583)	intergenic	2704	DEL.254	-
1	4700880	4700880	IQCA1	intronic	76	INS.338	-
1	4711131	4711131	IQCA1	intronic	219	INS.339	-
1	4748120	4748120	IQCA1	intronic	58	INS.340	-
1	4782583	4782583	IQCA1	intronic	992	INS.341	-
1	4794926	4794983	IQCA1	intronic	57	DEL.255	-
1	4872285	4872654	IQCA1	intronic	369	DEL.256	-
1	4907808	4908263	IQCA1(dist=32751),ASB18(dist=14020)	intergenic	455	DEL.257	-
1	4929259	4929259	ASB18	intronic	225	INS.342	-
1	4965029	4965029	ASB18	intronic	207	INS.343	-
1	4985297	4985297	ASB18	intronic	59	INS.344	-
1	4997762	4997762	ASB18	intronic	150	INS.345	-
1	5033996	5033996	GBX2(dist=14310),AGAP1(dist=22416)	intergenic	844	INS.346	-
1	5042694	5042694	GBX2(dist=23008),AGAP1(dist=13718)	intergenic	1103	INS.347	-
1	5048346	5048346	GBX2(dist=28660),AGAP1(dist=8066)	intergenic	176	INS.348	-
1	5049903	5049903	GBX2(dist=30217),AGAP1(dist=6509)	intergenic	682	INS.349	-
1	5050096	5050210	GBX2(dist=30410),AGAP1(dist=6202)	intergenic	114	DEL.258	-
1	5050194	5050194	GBX2(dist=30508),AGAP1(dist=6218)	intergenic	385	INS.350	-
1	5050273	5050332	GBX2(dist=30587),AGAP1(dist=6080)	intergenic	59	DEL.259	-
1	5051101	5051156	GBX2(dist=31415),AGAP1(dist=5256)	intergenic	55	DEL.260	-
1	5052902	5053526	GBX2(dist=33216),AGAP1(dist=2886)	intergenic	624	DEL.261	-
1	5085063	5085063	AGAP1	intronic	157	INS.351	-
1	5085118	5085118	AGAP1	intronic	405	INS.352	-
1	5085119	5085119	AGAP1	intronic	327	INS.353	-
1	5129755	5129755	AGAP1	intronic	80	INS.354	-
1	5141385	5141385	AGAP1	intronic	143	INS.355	-
1	5170767	5170767	AGAP1	intronic	592	INS.356	-
1	5171022	5171022	AGAP1	intronic	2966	INS.357	-
1	5171023	5171023	AGAP1	intronic	1322	INS.358	-
1	5171050	5171050	AGAP1	intronic	1114	INS.359	-
1	5171070	5171070	AGAP1	intronic	3080	INS.360	-
1	5171389	5171389	AGAP1	intronic	2026	INS.361	-
1	5180258	5180311	AGAP1	intronic	53	DEL.262	-
1	5187035	5187035	AGAP1	intronic	58	INS.362	-
1	5187041	5187099	AGAP1	intronic	58	DEL.263	-
1	5229387	5229387	AGAP1	intronic	60	INS.363	-
1	5270184	5270823	AGAP1	intronic	639	DEL.264	-
1	5279632	5279632	AGAP1	intronic	100	INS.364	-
1	5300676	5300676	AGAP1	intronic	71	INS.365	-
1	5335437	5335580	AGAP1	intronic	143	DEL.265	-
1	5338225	5338297	AGAP1	intronic	72	DEL.266	-
1	5338264	5338264	AGAP1	intronic	50	INS.366	-
1	5345366	5345366	AGAP1	intronic	391	INS.367	-
1	5345611	5345611	AGAP1	intronic	72	INS.368	-
1	5369140	5369140	AGAP1	intronic	306	INS.369	-
1	5369153	5369153	AGAP1	intronic	104	INS.370	-
1	5424633	5424633	AGAP1	intronic	68	INS.371	-
1	5437184	5437184	AGAP1	intronic	102	INS.372	-
1	5446548	5446599	AGAP1	intronic	51	DEL.267	-
1	5484088	5484088	AGAP1	intronic	64	INS.373	-
1	5484112	5484112	AGAP1	intronic	268	INS.374	-
1	5515588	5515588	AGAP1	intronic	353	INS.375	-
1	5515708	5515708	AGAP1	intronic	174	INS.376	-
1	5515743	5515743	AGAP1	intronic	428	INS.377	-
1	5515820	5515820	AGAP1	intronic	1200	INS.378	-
1	5515823	5515823	AGAP1	intronic	1875	INS.379	-
1	5515925	5515925	AGAP1	intronic	4533	INS.380	-
1	5536000	5536000	AGAP1	intronic	52	INS.381	-
1	5538345	5538345	AGAP1	intronic	101	INS.382	-
1	5549051	5549051	AGAP1	intronic	610	INS.383	-
1	5549110	5549110	AGAP1	intronic	1259	INS.384	-
1	5549849	5550029	AGAP1	intronic	180	DEL.268	-
1	5550481	5550481	AGAP1	intronic	284	INS.385	-
1	5553823	5554027	AGAP1	intronic	204	DEL.269	-
1	5554164	5554164	AGAP1	intronic	236	INS.386	-
1	5554166	5554166	AGAP1	intronic	130	INS.387	-
1	5569386	5569386	AGAP1	intronic	61	INS.388	-
1	5569517	5569517	AGAP1	intronic	709	INS.389	-
1	5569518	5569518	AGAP1	intronic	298	INS.390	-
1	5569633	5569633	AGAP1	intronic	335	INS.391	-
1	5570092	5570259	AGAP1	intronic	167	DEL.270	-
1	5574907	5574963	AGAP1	intronic	56	DEL.271	-
1	5576506	5576506	AGAP1	intronic	68	INS.392	-
1	5578058	5578058	AGAP1	intronic	103	INS.393	-
1	5595714	5595714	AGAP1	intronic	76	INS.394	-
1	5665031	5665081	AGAP1(dist=32911),SH3BP4(dist=382189)	intergenic	50	DEL.272	-
1	5688599	5688660	AGAP1(dist=56479),SH3BP4(dist=358610)	intergenic	61	DEL.273	-
1	5695785	5695785	AGAP1(dist=63665),SH3BP4(dist=351485)	intergenic	132	INS.395	-
1	5716873	5716991	AGAP1(dist=84753),SH3BP4(dist=330279)	intergenic	118	DEL.274	-
1	5724661	5724661	AGAP1(dist=92541),SH3BP4(dist=322609)	intergenic	86	INS.396	-
1	5739653	5739653	AGAP1(dist=107533),SH3BP4(dist=307617)	intergenic	88	INS.397	-
1	5755321	5755841	AGAP1(dist=123201),SH3BP4(dist=291429)	intergenic	520	DEL.275	-
1	5777468	5777468	AGAP1(dist=145348),SH3BP4(dist=269802)	intergenic	88	INS.398	-
1	5785999	5786183	AGAP1(dist=153879),SH3BP4(dist=261087)	intergenic	184	DEL.276	-
1	5840190	5840599	AGAP1(dist=208070),SH3BP4(dist=206671)	intergenic	409	DEL.277	-
1	5847864	5847945	AGAP1(dist=215744),SH3BP4(dist=199325)	intergenic	81	DEL.278	-
1	5868103	5868210	AGAP1(dist=235983),SH3BP4(dist=179060)	intergenic	107	DEL.279	-
1	5868248	5868302	AGAP1(dist=236128),SH3BP4(dist=178968)	intergenic	54	DEL.280	-
1	5868302	5868302	AGAP1(dist=236182),SH3BP4(dist=178968)	intergenic	54	INS.399	-
1	5877060	5877060	AGAP1(dist=244940),SH3BP4(dist=170210)	intergenic	111	INS.400	-
1	5889462	5889462	AGAP1(dist=257342),SH3BP4(dist=157808)	intergenic	53	INS.401	-
1	5895694	5895694	AGAP1(dist=263574),SH3BP4(dist=151576)	intergenic	122	INS.402	-
1	5906905	5906905	AGAP1(dist=274785),SH3BP4(dist=140365)	intergenic	50	INS.403	-
1	5909111	5909111	AGAP1(dist=276991),SH3BP4(dist=138159)	intergenic	378	INS.404	-
1	5919761	5919842	AGAP1(dist=287641),SH3BP4(dist=127428)	intergenic	81	DEL.281	-
1	5919795	5919795	AGAP1(dist=287675),SH3BP4(dist=127475)	intergenic	162	INS.405	-
1	5941721	5943228	AGAP1(dist=309601),SH3BP4(dist=104042)	intergenic	1507	DEL.282	-
1	5942762	5942819	AGAP1(dist=310642),SH3BP4(dist=104451)	intergenic	57	DEL.283	-
1	5943107	5943231	AGAP1(dist=310987),SH3BP4(dist=104039)	intergenic	124	DEL.284	-
1	5944270	5944270	AGAP1(dist=312150),SH3BP4(dist=103000)	intergenic	98	INS.406	-
1	5944424	5944424	AGAP1(dist=312304),SH3BP4(dist=102846)	intergenic	1006	INS.407	-
1	5944731	5944731	AGAP1(dist=312611),SH3BP4(dist=102539)	intergenic	234	INS.408	-
1	5944773	5944938	AGAP1(dist=312653),SH3BP4(dist=102332)	intergenic	165	DEL.285	-
1	5983400	5983400	AGAP1(dist=351280),SH3BP4(dist=63870)	intergenic	81	INS.409	-
1	6082034	6082291	SH3BP4	intronic	257	DEL.286	-
1	6082822	6082822	SH3BP4	intronic	80	INS.410	-
1	6091513	6091513	SH3BP4	intronic	68	INS.411	-
1	6097184	6097184	SH3BP4	intronic	97	INS.412	-
1	6097202	6097202	SH3BP4	intronic	372	INS.413	-
1	6098275	6098774	SH3BP4	intronic	499	DEL.287	-
1	6214116	6214116	SH3BP4(dist=68015),ARL4C(dist=361413)	intergenic	75	INS.414	-
1	6222017	6222262	SH3BP4(dist=75916),ARL4C(dist=353267)	intergenic	245	DEL.288	-
1	6246090	6246090	SH3BP4(dist=99989),ARL4C(dist=329439)	intergenic	92	INS.415	-
1	6273088	6273088	SH3BP4(dist=126987),ARL4C(dist=302441)	intergenic	194	INS.416	-
1	6282114	6282114	SH3BP4(dist=136013),ARL4C(dist=293415)	intergenic	98	INS.417	-
1	6293835	6294411	SH3BP4(dist=147734),ARL4C(dist=281118)	intergenic	576	DEL.289	-
1	6328242	6328242	SH3BP4(dist=182141),ARL4C(dist=247287)	intergenic	395	INS.418	-
1	6328249	6328666	SH3BP4(dist=182148),ARL4C(dist=246863)	intergenic	417	DEL.290	-
1	6328265	6328265	SH3BP4(dist=182164),ARL4C(dist=247264)	intergenic	935	INS.419	-
1	6328664	6328664	SH3BP4(dist=182563),ARL4C(dist=246865)	intergenic	1342	INS.420	-
1	6328718	6328718	SH3BP4(dist=182617),ARL4C(dist=246811)	intergenic	51	INS.421	-
1	6338157	6338157	SH3BP4(dist=192056),ARL4C(dist=237372)	intergenic	94	INS.422	-
1	6343356	6343834	SH3BP4(dist=197255),ARL4C(dist=231695)	intergenic	478	DEL.291	-
1	6377011	6377126	SH3BP4(dist=230910),ARL4C(dist=198403)	intergenic	115	DEL.292	-
1	6378722	6378722	SH3BP4(dist=232621),ARL4C(dist=196807)	intergenic	84	INS.423	-
1	6390145	6390145	SH3BP4(dist=244044),ARL4C(dist=185384)	intergenic	6824	INS.424	-
1	6413885	6414002	SH3BP4(dist=267784),ARL4C(dist=161527)	intergenic	117	DEL.293	-
1	6424878	6432705	SH3BP4(dist=278777),ARL4C(dist=142824)	intergenic	7827	DEL.294	-
1	6445352	6445352	SH3BP4(dist=299251),ARL4C(dist=130177)	intergenic	711	INS.425	-
1	6451502	6451502	SH3BP4(dist=305401),ARL4C(dist=124027)	intergenic	122	INS.426	-
1	6472384	6472384	SH3BP4(dist=326283),ARL4C(dist=103145)	intergenic	521	INS.427	-
1	6504907	6505086	SH3BP4(dist=358806),ARL4C(dist=70443)	intergenic	179	DEL.295	-
1	6513757	6513831	SH3BP4(dist=367656),ARL4C(dist=61698)	intergenic	74	DEL.296	-
1	6534917	6534917	SH3BP4(dist=388816),ARL4C(dist=40612)	intergenic	67	INS.428	-
1	6538830	6538883	SH3BP4(dist=392729),ARL4C(dist=36646)	intergenic	53	DEL.297	-
1	6559291	6559475	SH3BP4(dist=413190),ARL4C(dist=16054)	intergenic	184	DEL.298	-
1	6559334	6559334	SH3BP4(dist=413233),ARL4C(dist=16195)	intergenic	148	INS.429	-
1	6559394	6559539	SH3BP4(dist=413293),ARL4C(dist=15990)	intergenic	145	DEL.299	-
1	6559473	6559565	SH3BP4(dist=413372),ARL4C(dist=15964)	intergenic	92	DEL.300	-
1	6559520	6559520	SH3BP4(dist=413419),ARL4C(dist=16009)	intergenic	426	INS.430	-
1	6559557	6559557	SH3BP4(dist=413456),ARL4C(dist=15972)	intergenic	696	INS.431	-
1	6568082	6568082	SH3BP4(dist=421981),ARL4C(dist=7447)	intergenic	51	INS.432	-
1	6697670	6697670	ARL4C(dist=121563),SPP2(dist=259334)	intergenic	85	INS.433	-
1	6704789	6705064	ARL4C(dist=128682),SPP2(dist=251940)	intergenic	275	DEL.301	-
1	6745891	6745891	ARL4C(dist=169784),SPP2(dist=211113)	intergenic	1479	INS.434	-
1	6787285	6787285	ARL4C(dist=211178),SPP2(dist=169719)	intergenic	1313	INS.435	-
1	6808061	6808061	ARL4C(dist=231954),SPP2(dist=148943)	intergenic	337	INS.436	-
1	6906165	6906165	ARL4C(dist=330058),SPP2(dist=50839)	intergenic	143	INS.437	-
1	6947314	6947420	ARL4C(dist=371207),SPP2(dist=9584)	intergenic	106	DEL.302	-
1	6960879	6960941	SPP2	intronic	62	DEL.303	-
1	6965134	6965134	SPP2	intronic	7477	INS.438	-
1	7070621	7070621	TRPM8	intronic	513	INS.439	-
1	7073182	7073436	TRPM8	intronic	254	DEL.304	-
1	7110862	7110913	TRPM8	intronic	51	DEL.305	-
1	7132280	7132280	TRPM8	intronic	69	INS.440	-
1	7183011	7183011	LOC105616272(dist=9530),LOC105616273(dist=6179)	intergenic	162	INS.441	-
1	7201323	7201535	LOC105616273	intronic	212	DEL.306	-
1	7201447	7201447	LOC105616273	intronic	98	INS.442	-
1	7228204	7228204	LOC105616273	intronic	76	INS.443	-
1	7255977	7257698	UGT1A1,UGT1A3,UGT1A4,UGT1A6,UGT1A9	intronic	1721	DEL.307	-
1	7274781	7274975	UGT1A3,UGT1A4,UGT1A6,UGT1A9	intronic	194	DEL.308	-
1	7306366	7306647	UGT1A3,UGT1A4,UGT1A6,UGT1A9	intronic	281	DEL.309	-
1	7332309	7332428	UGT1A3,UGT1A6,UGT1A9	intronic	119	DEL.310	-
1	7349112	7350217	UGT1A3,UGT1A6,UGT1A9	intronic	1105	DEL.311	-
1	7362889	7364543	UGT1A3,UGT1A6,UGT1A9	intronic	1654	DEL.312	-
1	7367577	7367634	UGT1A3,UGT1A6,UGT1A9	intronic	57	DEL.313	-
1	7368725	7368780	UGT1A3,UGT1A6,UGT1A9	intronic	55	DEL.314	-
1	7403177	7403283	UGT1A6,UGT1A9	intronic	106	DEL.315	-
1	7467650	7467871	USP40	intronic	221	DEL.316	-
1	7492187	7492187	USP40	intronic	75	INS.444	-
1	7532542	7532542	DGKD	intronic	81	INS.445	-
1	7591466	7591466	DGKD	intronic	216	INS.446	-
1	7591471	7591471	DGKD	intronic	72	INS.447	-
1	7610148	7610148	DGKD	intronic	174	INS.448	-
1	7616210	7616210	DGKD	intronic	288	INS.449	-
1	7628189	7628189	DGKD	intronic	74	INS.450	-
1	7659640	7659640	SAG	intronic	87	INS.451	-
1	7671253	7671253	SAG	intronic	131	INS.452	-
1	7765017	7765017	ATG16L1(dist=34617),INPP5D(dist=1922)	intergenic	2937	INS.453	-
1	7765032	7765230	ATG16L1(dist=34632),INPP5D(dist=1709)	intergenic	198	DEL.317	-
1	7765186	7765186	ATG16L1(dist=34786),INPP5D(dist=1753)	intergenic	69	INS.454	-
1	7765218	7765218	ATG16L1(dist=34818),INPP5D(dist=1721)	intergenic	372	INS.455	-
1	7782720	7783485	INPP5D	intronic	765	DEL.318	-
1	7792599	7792599	INPP5D	intronic	187	INS.456	-
1	7801169	7801169	INPP5D	intronic	751	INS.457	-
1	7803352	7803473	INPP5D	intronic	121	DEL.319	-
1	7803483	7803483	INPP5D	intronic	74	INS.458	-
1	7803583	7803583	INPP5D	intronic	360	INS.459	-
1	7811677	7811845	INPP5D	intronic	168	DEL.320	-
1	7884180	7884715	INPP5D	intronic	535	DEL.321	-
1	7941152	7951334	NEU2(dist=4350),NGEF(dist=22364)	intergenic	10182	DEL.322	-
1	8046404	8047052	NGEF	intronic	648	DEL.323	-
1	8082956	8082956	NGEF	intronic	166	INS.460	-
1	8084810	8084810	NGEF	intronic	117	INS.461	-
1	8093234	8094851	NGEF	intronic	1617	DEL.324	-
1	8098348	8098348	NGEF	intronic	174	INS.462	-
1	8104681	8104681	SNORC	intronic	93	INS.463	-
1	8104732	8104732	SNORC	intronic	81	INS.464	-
1	8132923	8132976	GIGYF2	intronic	53	DEL.325	-
1	8133008	8133008	GIGYF2	intronic	212	INS.465	-
1	8133112	8133112	GIGYF2	intronic	106	INS.466	-
1	8151991	8151991	GIGYF2	intronic	82	INS.467	-
1	8216768	8216768	GIGYF2	intronic	107	INS.468	-
1	8223891	8224348	GIGYF2	intronic	457	DEL.326	-
1	8233189	8233189	GIGYF2	intronic	210	INS.469	-
1	8252220	8252220	GIGYF2	intronic	1082	INS.470	-
1	8276115	8276115	EFHD1	intronic	76	INS.471	-
1	8316656	8316656	EFHD1	upstream	129	INS.472	-
1	8326420	8326420	EFHD1(dist=10305),ZSCAN20(dist=45682)	intergenic	1487	INS.473	-
1	8327509	8327509	EFHD1(dist=11394),ZSCAN20(dist=44593)	intergenic	221	INS.474	-
1	8398824	8398936	ZSCAN20(dist=4680),CSMD2(dist=19125)	intergenic	112	DEL.327	-
1	8400782	8400782	ZSCAN20(dist=6638),CSMD2(dist=17279)	intergenic	8404	INS.475	-
1	8465025	8465025	CSMD2	intronic	271	INS.476	-
1	8530664	8530664	CSMD2	intronic	56	INS.477	-
1	8542835	8544014	CSMD2	intronic	1179	DEL.328	-
1	8549733	8549733	CSMD2	intronic	745	INS.478	RPL13
1	8558257	8559600	CSMD2	intronic	1343	DEL.329	-
1	8563133	8563133	CSMD2	intronic	284	INS.479	-
1	8563253	8563253	CSMD2	intronic	283	INS.480	-
1	8605117	8605182	CSMD2	intronic	65	DEL.330	-
1	8605183	8605183	CSMD2	intronic	64	INS.481	-
1	8617062	8617062	CSMD2	intronic	59	INS.482	-
1	8617257	8617257	CSMD2	intronic	406	INS.483	-
1	8626680	8626756	CSMD2	intronic	76	DEL.331	-
1	8638321	8639337	CSMD2	intronic	1016	DEL.332	-
1	8683356	8683408	CSMD2	intronic	52	DEL.333	-
1	8686421	8686421	CSMD2	intronic	147	INS.484	-
1	8695242	8695242	CSMD2	intronic	51	INS.485	-
1	8695253	8695253	CSMD2	intronic	153	INS.486	-
1	8695328	8695328	CSMD2	intronic	51	INS.487	-
1	8720753	8720753	CSMD2	intronic	328	INS.488	-
1	8756060	8756118	CSMD2	intronic	58	DEL.334	-
1	8763664	8763723	CSMD2	intronic	59	DEL.335	-
1	8787217	8787217	CSMD2	intronic	51	INS.489	-
1	8787279	8787279	CSMD2	intronic	750	INS.490	-
1	8787322	8787322	CSMD2	intronic	271	INS.491	-
1	8787540	8787540	CSMD2	intronic	51	INS.492	-
1	8812150	8812353	CSMD2	intronic	203	DEL.336	-
1	8860326	8860431	CSMD2	intronic	105	DEL.337	-
1	8863005	8863005	CSMD2	intronic	79	INS.493	-
1	8910226	8910226	CSMD2	intronic	90	INS.494	-
1	8935134	8935134	CSMD2	intronic	1123	INS.495	-
1	8935688	8935807	CSMD2	intronic	119	DEL.338	-
1	8979589	8980301	CSMD2	intronic	712	DEL.339	-
1	8997474	8997474	CSMD2	intronic	636	INS.496	-
1	9009101	9009101	CSMD2	intronic	257	INS.497	-
1	9046101	9046101	CSMD2	intronic	60	INS.498	-
1	9060081	9060081	CSMD2	intronic	121	INS.499	-
1	9066292	9066364	CSMD2	intronic	72	DEL.340	-
1	9072228	9072228	CSMD2	intronic	587	INS.500	-
1	9144396	9144396	C1H1orf94	intronic	72	INS.501	-
1	9193061	9193061	C1H1orf94(dist=31196),GJB5(dist=603064)	intergenic	55	INS.502	-
1	9199060	9199060	C1H1orf94(dist=37195),GJB5(dist=597065)	intergenic	1705	INS.503	-
1	9268039	9268039	C1H1orf94(dist=106174),GJB5(dist=528086)	intergenic	86	INS.504	-
1	9279615	9280199	C1H1orf94(dist=117750),GJB5(dist=515926)	intergenic	584	DEL.341	-
1	9291670	9291813	C1H1orf94(dist=129805),GJB5(dist=504312)	intergenic	143	DEL.342	-
1	9291714	9292000	C1H1orf94(dist=129849),GJB5(dist=504125)	intergenic	286	DEL.343	-
1	9291719	9292291	C1H1orf94(dist=129854),GJB5(dist=503834)	intergenic	572	DEL.344	-
1	9354507	9354507	C1H1orf94(dist=192642),GJB5(dist=441618)	intergenic	7750	INS.505	-
1	9368324	9368562	C1H1orf94(dist=206459),GJB5(dist=427563)	intergenic	238	DEL.345	-
1	9378522	9378522	C1H1orf94(dist=216657),GJB5(dist=417603)	intergenic	668	INS.506	-
1	9414986	9414986	C1H1orf94(dist=253121),GJB5(dist=381139)	intergenic	117	INS.507	-
1	9442537	9442537	C1H1orf94(dist=280672),GJB5(dist=353588)	intergenic	75	INS.508	-
1	9536988	9536988	C1H1orf94(dist=375123),GJB5(dist=259137)	intergenic	2269	INS.509	-
1	9565771	9565771	C1H1orf94(dist=403906),GJB5(dist=230354)	intergenic	77	INS.510	-
1	9570476	9578167	C1H1orf94(dist=408611),GJB5(dist=217958)	intergenic	7691	DEL.346	-
1	9601526	9601526	C1H1orf94(dist=439661),GJB5(dist=194599)	intergenic	317	INS.511	-
1	9646764	9646764	C1H1orf94(dist=484899),GJB5(dist=149361)	intergenic	221	INS.512	-
1	9669052	9669333	C1H1orf94(dist=507187),GJB5(dist=126792)	intergenic	281	DEL.347	-
1	9675898	9675952	C1H1orf94(dist=514033),GJB5(dist=120173)	intergenic	54	DEL.348	-
1	9688222	9688222	C1H1orf94(dist=526357),GJB5(dist=107903)	intergenic	181	INS.513	-
1	9751705	9751797	C1H1orf94(dist=589840),GJB5(dist=44328)	intergenic	92	DEL.349	-
1	9770472	9770472	C1H1orf94(dist=608607),GJB5(dist=25653)	intergenic	178	INS.514	-
1	9818570	9818570	GJB4(dist=15059),GJB3(dist=6108)	intergenic	535	INS.515	-
1	9833913	9833913	GJB3(dist=3972),GJA4(dist=5798)	intergenic	109	INS.516	-
1	9833918	9834059	GJB3(dist=3977),GJA4(dist=5652)	intergenic	141	DEL.350	-
1	9846598	9846598	GJA4(dist=4213),SMIM12(dist=44344)	intergenic	135	INS.517	-
1	9850317	9850317	GJA4(dist=7932),SMIM12(dist=40625)	intergenic	502	INS.518	-
1	9859960	9859960	GJA4(dist=17575),SMIM12(dist=30982)	intergenic	53	INS.519	-
1	9999135	9999200	DLGAP3(dist=34278),LOC101114743(dist=25842)	intergenic	65	DEL.351	-
1	10100832	10100832	ZMYM6(dist=19580),ZMYM1(dist=3991)	intergenic	143	INS.520	-
1	10101933	10102487	ZMYM6(dist=20681),ZMYM1(dist=2336)	intergenic	554	DEL.352	-
1	10102458	10102458	ZMYM6(dist=21206),ZMYM1(dist=2365)	intergenic	130	INS.521	-
1	10141202	10141202	LOC105602104	intronic	926	INS.522	-
1	10147694	10147694	LOC105602104	intronic	67	INS.523	-
1	10193323	10193761	SFPQ(dist=9060),LOC101109132(dist=23648)	intergenic	438	DEL.353	-
1	10209146	10209390	SFPQ(dist=24883),LOC101109132(dist=8019)	intergenic	244	DEL.354	-
1	10215324	10215324	SFPQ(dist=31061),LOC101109132(dist=2085)	intergenic	72	INS.524	-
1	10217371	10218352	LOC101109132	exonic	981	DEL.355	-
1	10304172	10304172	ZMYM4	intronic	117	INS.525	-
1	10313561	10313561	ZMYM4	intronic	140	INS.526	-
1	10313750	10315058	ZMYM4	intronic	1308	DEL.356	-
1	10323387	10323387	ZMYM4	intronic	271	INS.527	-
1	10367966	10367966	ZMYM4	intronic	905	INS.528	-
1	10399636	10399636	ZMYM4	intronic	98	INS.529	-
1	10441232	10441232	KIAA0319L	intronic	87	INS.530	-
1	10473676	10474479	KIAA0319L	intronic	803	DEL.357	-
1	10481885	10483790	KIAA0319L	intronic	1905	DEL.358	-
1	10618726	10619088	PSMB2(dist=7579),C1H1orf216(dist=53456)	intergenic	362	DEL.359	-
1	10621618	10621618	PSMB2(dist=10471),C1H1orf216(dist=50926)	intergenic	186	INS.531	-
1	10622808	10622808	PSMB2(dist=11661),C1H1orf216(dist=49736)	intergenic	145	INS.532	-
1	10622912	10622912	PSMB2(dist=11765),C1H1orf216(dist=49632)	intergenic	371	INS.533	-
1	10643896	10643995	PSMB2(dist=32749),C1H1orf216(dist=28549)	intergenic	99	DEL.360	-
1	10647363	10647363	PSMB2(dist=36216),C1H1orf216(dist=25181)	intergenic	437	INS.534	-
1	10662767	10662767	PSMB2(dist=51620),C1H1orf216(dist=9777)	intergenic	660	INS.535	-
1	10670732	10670732	PSMB2(dist=59585),C1H1orf216(dist=1812)	intergenic	192	INS.536	-
1	10756880	10756880	AGO4	intronic	120	INS.537	-
1	10763446	10764592	AGO4	intronic	1146	DEL.361	-
1	10799035	10799035	AGO4(dist=6527),LOC101111060(dist=24095)	intergenic	1225	INS.538	-
1	10899046	10899046	AGO3	intronic	943	INS.539	-
1	10921337	10921337	AGO3(XM_012097219.3:c.-180720>0)	UTR5	4501	INS.540	-
1	10962582	10962725	AGO3	intronic	143	DEL.362	-
1	10971385	10971385	AGO3	intronic	133	INS.541	-
1	11001203	11001203	LOC121818983,TEKT2	intronic	107	INS.542	-
1	11038899	11038899	COL8A2(dist=4001),TRAPPC3(dist=4946)	intergenic	1232	INS.543	-
1	11136116	11136116	THRAP3	intronic	2109	INS.544	-
1	11140308	11140429	THRAP3	intronic	121	DEL.363	-
1	11180260	11180759	SH3D21	intronic	499	DEL.364	-
1	11354142	11354142	CSF3R(dist=40303),GRIK3(dist=281871)	intergenic	52	INS.545	-
1	11362135	11362135	CSF3R(dist=48296),GRIK3(dist=273878)	intergenic	763	INS.546	-
1	11362456	11362456	CSF3R(dist=48617),GRIK3(dist=273557)	intergenic	582	INS.547	-
1	11362631	11362764	CSF3R(dist=48792),GRIK3(dist=273249)	intergenic	133	DEL.365	-
1	11362807	11362807	CSF3R(dist=48968),GRIK3(dist=273206)	intergenic	369	INS.548	-
1	11407201	11407201	CSF3R(dist=93362),GRIK3(dist=228812)	intergenic	1201	INS.549	-
1	11415215	11415694	CSF3R(dist=101376),GRIK3(dist=220319)	intergenic	479	DEL.366	-
1	11415664	11415664	CSF3R(dist=101825),GRIK3(dist=220349)	intergenic	60	INS.550	-
1	11415703	11415703	CSF3R(dist=101864),GRIK3(dist=220310)	intergenic	240	INS.551	-
1	11446412	11446412	CSF3R(dist=132573),GRIK3(dist=189601)	intergenic	67	INS.552	-
1	11446475	11446475	CSF3R(dist=132636),GRIK3(dist=189538)	intergenic	162	INS.553	-
1	11460113	11460313	CSF3R(dist=146274),GRIK3(dist=175700)	intergenic	200	DEL.367	-
1	11460285	11460285	CSF3R(dist=146446),GRIK3(dist=175728)	intergenic	90	INS.554	-
1	11515270	11515399	CSF3R(dist=201431),GRIK3(dist=120614)	intergenic	129	DEL.368	-
1	11544307	11544392	CSF3R(dist=230468),GRIK3(dist=91621)	intergenic	85	DEL.369	-
1	11586861	11588366	CSF3R(dist=273022),GRIK3(dist=47647)	intergenic	1505	DEL.370	-
1	11594019	11594019	CSF3R(dist=280180),GRIK3(dist=41994)	intergenic	513	INS.555	-
1	11772010	11772637	GRIK3	intronic	627	DEL.371	-
1	11818238	11818238	GRIK3	intronic	3361	INS.556	-
1	11930217	11930217	GRIK3(dist=46701),ZC3H12A(dist=372091)	intergenic	75	INS.557	-
1	12051587	12051587	GRIK3(dist=168071),ZC3H12A(dist=250721)	intergenic	7747	INS.558	-
1	12055497	12055497	GRIK3(dist=171981),ZC3H12A(dist=246811)	intergenic	2337	INS.559	-
1	12095796	12095796	GRIK3(dist=212280),ZC3H12A(dist=206512)	intergenic	143	INS.560	-
1	12098458	12098458	GRIK3(dist=214942),ZC3H12A(dist=203850)	intergenic	74	INS.561	-
1	12118508	12118508	GRIK3(dist=234992),ZC3H12A(dist=183800)	intergenic	879	INS.562	-
1	12148457	12148512	GRIK3(dist=264941),ZC3H12A(dist=153796)	intergenic	55	DEL.372	-
1	12167185	12167185	GRIK3(dist=283669),ZC3H12A(dist=135123)	intergenic	2264	INS.563	-
1	12167281	12167363	GRIK3(dist=283765),ZC3H12A(dist=134945)	intergenic	82	DEL.373	-
1	12173735	12173735	GRIK3(dist=290219),ZC3H12A(dist=128573)	intergenic	874	INS.564	-
1	12198808	12198808	GRIK3(dist=315292),ZC3H12A(dist=103500)	intergenic	55	INS.565	-
1	12207316	12207584	GRIK3(dist=323800),ZC3H12A(dist=94724)	intergenic	268	DEL.374	-
1	12207421	12207421	GRIK3(dist=323905),ZC3H12A(dist=94887)	intergenic	134	INS.566	-
1	12227076	12227126	GRIK3(dist=343560),ZC3H12A(dist=75182)	intergenic	50	DEL.375	-
1	12260674	12260674	GRIK3(dist=377158),ZC3H12A(dist=41634)	intergenic	392	INS.567	-
1	12290445	12290610	GRIK3(dist=406929),ZC3H12A(dist=11698)	intergenic	165	DEL.376	-
1	12325298	12325659	MEAF6	intronic	361	DEL.377	-
1	12418030	12418030	GNL2(dist=10292),RSPO1(dist=6448)	intergenic	80	INS.568	-
1	12472424	12472424	RSPO1(dist=27429),C1H1orf109(dist=20552)	intergenic	62	INS.569	-
1	12581725	12582247	EPHA10(dist=18747),MANEAL(dist=7277)	intergenic	522	DEL.378	-
1	12594662	12594975	MANEAL	intronic	313	DEL.379	-
1	12594665	12594665	MANEAL	intronic	133	INS.570	-
1	12594976	12594976	MANEAL	intronic	73	INS.571	-
1	12660173	12660173	INPP5B	intronic	116	INS.572	-
1	12660187	12660187	INPP5B	intronic	115	INS.573	-
1	12682097	12682183	INPP5B	intronic	86	DEL.380	-
1	12703335	12703335	INPP5B	upstream	60	INS.574	-
1	12763388	12763782	UTP11	intronic	394	DEL.381	-
1	12763528	12763528	UTP11	intronic	85	INS.575	-
1	12833403	12833403	POU3F1(dist=46176),TRNAC-GCA(dist=211136)	intergenic	98	INS.576	-
1	12899163	12899366	POU3F1(dist=111936),TRNAC-GCA(dist=145173)	intergenic	203	DEL.382	-
1	12916520	12916520	POU3F1(dist=129293),TRNAC-GCA(dist=128019)	intergenic	75	INS.577	-
1	12954514	12954514	POU3F1(dist=167287),TRNAC-GCA(dist=90025)	intergenic	58	INS.578	-
1	13001493	13001493	POU3F1(dist=214266),TRNAC-GCA(dist=43046)	intergenic	325	INS.579	-
1	13048556	13048556	TRNAC-GCA(dist=3946),RRAGC(dist=528321)	intergenic	103	INS.580	-
1	13096975	13098038	TRNAC-GCA(dist=52365),RRAGC(dist=478839)	intergenic	1063	DEL.383	-
1	13128141	13128141	TRNAC-GCA(dist=83531),RRAGC(dist=448736)	intergenic	1114	INS.581	-
1	13134891	13134891	TRNAC-GCA(dist=90281),RRAGC(dist=441986)	intergenic	74	INS.582	-
1	13187964	13188026	TRNAC-GCA(dist=143354),RRAGC(dist=388851)	intergenic	62	DEL.384	-
1	13191239	13191239	TRNAC-GCA(dist=146629),RRAGC(dist=385638)	intergenic	2866	INS.583	-
1	13196543	13196543	TRNAC-GCA(dist=151933),RRAGC(dist=380334)	intergenic	378	INS.584	-
1	13196563	13196563	TRNAC-GCA(dist=151953),RRAGC(dist=380314)	intergenic	147	INS.585	-
1	13247781	13247781	TRNAC-GCA(dist=203171),RRAGC(dist=329096)	intergenic	107	INS.586	-
1	13251745	13251745	TRNAC-GCA(dist=207135),RRAGC(dist=325132)	intergenic	158	INS.587	-
1	13263030	13263030	TRNAC-GCA(dist=218420),RRAGC(dist=313847)	intergenic	62	INS.588	-
1	13263065	13263065	TRNAC-GCA(dist=218455),RRAGC(dist=313812)	intergenic	124	INS.589	-
1	13274584	13274584	TRNAC-GCA(dist=229974),RRAGC(dist=302293)	intergenic	1262	INS.590	PRELID1
1	13401304	13401304	TRNAC-GCA(dist=356694),RRAGC(dist=175573)	intergenic	2642	INS.591	-
1	13442287	13442287	TRNAC-GCA(dist=397677),RRAGC(dist=134590)	intergenic	1489	INS.592	RPL7L1
1	13452035	13452133	TRNAC-GCA(dist=407425),RRAGC(dist=124744)	intergenic	98	DEL.385	-
1	13466912	13466912	TRNAC-GCA(dist=422302),RRAGC(dist=109965)	intergenic	2099	INS.593	-
1	13576683	13576683	RRAGC	downstream	146	INS.594	-
1	13577030	13586063	RRAGC	exonic	9033	DEL.386	-
1	13584276	13584276	RRAGC	intronic	64	INS.595	-
1	13586672	13589345	RRAGC	exonic	2673	DEL.387	-
1	13624511	13624511	RHBDL2	intronic	66	INS.596	-
1	13642214	13642214	RHBDL2	intronic	55	INS.597	-
1	13644591	13646311	RHBDL2	intronic	1720	DEL.388	-
1	13655101	13655101	RHBDL2	intronic	143	INS.598	-
1	13679770	13682603	TRNAA-UGC	ncRNA_exonic	2833	DEL.389	-
1	13707035	13707035	TRNAA-UGC(dist=24825),AKIRIN1(dist=6434)	intergenic	751	INS.599	-
1	13738246	13738246	NDUFS5	intronic	958	INS.600	-
1	13846559	13846611	MACF1	intronic	52	DEL.390	-
1	13852277	13852277	MACF1	intronic	169	INS.601	-
1	13889543	13889543	MACF1	intronic	51	INS.602	-
1	13910989	13910989	MACF1	intronic	74	INS.603	-
1	13912692	13912692	MACF1	intronic	72	INS.604	-
1	13952468	13952468	MACF1	intronic	128	INS.605	-
1	13954659	13955203	MACF1	intronic	544	DEL.391	-
1	14041629	14043791	MACF1	intronic	2162	DEL.392	-
1	14060610	14060796	MACF1	exonic	186	DEL.393	-
1	14060710	14060710	MACF1	exonic	186	INS.606	-
1	14060803	14060803	MACF1	exonic	63	INS.607	-
1	14061033	14061033	MACF1	exonic	156	INS.608	-
1	14061179	14061179	MACF1	exonic	117	INS.609	-
1	14061255	14061255	MACF1	exonic	78	INS.610	-
1	14138284	14141053	LOC114114126	exonic	2769	DEL.394	-
1	14141856	14141856	LOC101120626	intronic	968	INS.611	-
1	14152343	14152343	LOC105604051(XM_012101902.4:c.*6060>0)	UTR3	325	INS.612	-
1	14164318	14164318	LOC101120626	intronic	74	INS.613	-
1	14164347	14164450	LOC101120626	intronic	103	DEL.395	-
1	14175763	14176994	LOC101120626(dist=2382),PABPC4(dist=28611)	intergenic	1231	DEL.396	-
1	14201412	14201412	LOC101120626(dist=28031),PABPC4(dist=4193)	intergenic	555	INS.614	-
1	14201424	14201424	LOC101120626(dist=28043),PABPC4(dist=4181)	intergenic	370	INS.615	-
1	14229376	14229443	PABPC4(dist=9637),HEYL(dist=28010)	intergenic	67	DEL.397	-
1	14268839	14268839	HEYL	intronic	57	INS.616	-
1	14349258	14349308	HPCAL4(dist=19809),PPIE(dist=26070)	intergenic	50	DEL.398	-
1	14374079	14374079	HPCAL4(dist=44630),PPIE(dist=1299)	intergenic	175	INS.617	-
1	14374092	14374092	HPCAL4(dist=44643),PPIE(dist=1286)	intergenic	109	INS.618	-
1	14387907	14387907	PPIE	intronic	2023	INS.619	-
1	14476652	14476652	TRIT1	intronic	452	INS.620	-
1	14493212	14493212	TRIT1	intronic	212	INS.621	-
1	14495989	14495989	TRIT1	intronic	500	INS.622	-
1	14643079	14643079	MFSD2A(dist=56426),CAP1(dist=5779)	intergenic	879	INS.623	-
1	14660007	14660007	CAP1	intronic	656	INS.624	-
1	14690620	14690620	PPT1	intronic	256	INS.625	-
1	14711424	14714688	PPT1(dist=19703),LOC105603393(dist=13774)	intergenic	3264	DEL.399	-
1	14723037	14727340	PPT1(dist=31316),LOC105603393(dist=1122)	intergenic	4303	DEL.400	-
1	14728449	14730250	LOC105603393	exonic	1801	DEL.401	-
1	14735115	14737904	LOC105604595	downstream	2789	DEL.402	-
1	14765898	14765898	RLF	intronic	1054	INS.626	-
1	14792146	14792146	RLF	intronic	104	INS.627	-
1	14807075	14807075	RLF	intronic	195	INS.628	-
1	14811222	14811222	RLF	intronic	95	INS.629	-
1	14842701	14842701	TMCO2(dist=3028),ZMPSTE24(dist=14841)	intergenic	143	INS.630	-
1	14847190	14847424	TMCO2(dist=7517),ZMPSTE24(dist=10118)	intergenic	234	DEL.403	-
1	14890318	14891903	ZMPSTE24	intronic	1585	DEL.404	-
1	14928420	14928420	COL9A2(dist=2490),SMAP2(dist=34665)	intergenic	70	INS.631	-
1	14931083	14932647	COL9A2(dist=5153),SMAP2(dist=30438)	intergenic	1564	DEL.405	-
1	14958271	14958271	COL9A2(dist=32341),SMAP2(dist=4814)	intergenic	1128	INS.632	-
1	14994479	14994479	SMAP2	intronic	57	INS.633	-
1	15033467	15033567	ZFP69B	intronic	100	DEL.406	-
1	15036553	15037634	ZFP69B	exonic	1081	DEL.407	-
1	15039286	15047086	ZFP69B	intronic	7800	DEL.408	-
1	15042691	15042800	ZFP69B	intronic	109	DEL.409	-
1	15045247	15045247	ZFP69B	intronic	54	INS.634	-
1	15054657	15054657	ZFP69B(dist=1962),ZFP69(dist=2383)	intergenic	66	INS.635	-
1	15179312	15179312	RIMS3	intronic	478	INS.636	-
1	15179491	15179728	RIMS3	intronic	237	DEL.410	-
1	15179492	15179610	RIMS3	intronic	118	DEL.411	-
1	15179497	15179497	RIMS3	intronic	179	INS.637	-
1	15179557	15179557	RIMS3	intronic	57	INS.638	-
1	15180033	15180153	RIMS3	intronic	120	DEL.412	-
1	15180153	15180213	RIMS3	intronic	60	DEL.413	-
1	15198331	15198331	RIMS3	intronic	136	INS.639	-
1	15209618	15209618	RIMS3(dist=4744),NFYC(dist=16540)	intergenic	284	INS.640	-
1	15209635	15209635	RIMS3(dist=4761),NFYC(dist=16523)	intergenic	142	INS.641	-
1	15217339	15217339	RIMS3(dist=12465),NFYC(dist=8819)	intergenic	57	INS.642	-
1	15256664	15256862	NFYC	intronic	198	DEL.414	-
1	15256826	15256826	NFYC	intronic	94	INS.643	-
1	15263125	15263125	NFYC	intronic	101	INS.644	-
1	15373118	15373118	KCNQ4(dist=11443),CITED4(dist=11342)	intergenic	119	INS.645	-
1	15498129	15498362	CITED4(dist=112317),CTPS1(dist=4637)	intergenic	233	DEL.415	-
1	15563314	15563365	SCMH1	intronic	51	DEL.416	-
1	15572919	15572919	SCMH1	intronic	919	INS.646	-
1	15604166	15604166	SCMH1	intronic	176	INS.647	-
1	15640035	15640035	SCMH1	intronic	1697	INS.648	-
1	15641627	15641627	SCMH1	intronic	252	INS.649	-
1	15657951	15657951	SCMH1	intronic	453	INS.650	-
1	15756231	15756231	SCMH1	intronic	290	INS.651	-
1	15766207	15766266	SCMH1(dist=4591),TRNAG-CCC(dist=57654)	intergenic	59	DEL.417	-
1	15785864	15785950	SCMH1(dist=24248),TRNAG-CCC(dist=37970)	intergenic	86	DEL.418	-
1	15792476	15792476	SCMH1(dist=30860),TRNAG-CCC(dist=31444)	intergenic	73	INS.652	-
1	15938092	15938092	FOXO6(dist=27177),EDN2(dist=78192)	intergenic	1101	INS.653	-
1	16084146	16084146	HIVEP3	intronic	50	INS.654	-
1	16213147	16213223	HIVEP3	intronic	76	DEL.419	-
1	16213304	16213359	HIVEP3	intronic	55	DEL.420	-
1	16233149	16235398	HIVEP3	intronic	2249	DEL.421	-
1	16238402	16239190	HIVEP3	intronic	788	DEL.422	-
1	16332715	16332949	HIVEP3	intronic	234	DEL.423	-
1	16336088	16336159	HIVEP3	intronic	71	DEL.424	-
1	16338626	16338626	HIVEP3	intronic	120	INS.655	-
1	16370733	16370733	HIVEP3	intronic	78	INS.656	-
1	16372569	16372569	HIVEP3	intronic	57	INS.657	-
1	16397600	16397600	HIVEP3	intronic	195	INS.658	-
1	16409172	16409243	HIVEP3	intronic	71	DEL.425	-
1	16411318	16411318	HIVEP3	intronic	140	INS.659	-
1	16414842	16414897	HIVEP3	intronic	55	DEL.426	-
1	16423214	16424080	HIVEP3	intronic	866	DEL.427	-
1	16423298	16423298	HIVEP3	intronic	69	INS.660	-
1	16423325	16423599	HIVEP3	intronic	274	DEL.428	-
1	16423398	16423774	HIVEP3	intronic	376	DEL.429	-
1	16423584	16423700	HIVEP3	intronic	116	DEL.430	-
1	16423653	16423653	HIVEP3	intronic	89	INS.661	-
1	16423700	16423700	HIVEP3	intronic	100	INS.662	-
1	16423742	16423951	HIVEP3	intronic	209	DEL.431	-
1	16423751	16423751	HIVEP3	intronic	319	INS.663	-
1	16425151	16425151	HIVEP3	intronic	62	INS.664	-
1	16430372	16430372	HIVEP3	intronic	150	INS.665	-
1	16456145	16456145	HIVEP3	intronic	105	INS.666	-
1	16491623	16492680	HIVEP3	intronic	1057	DEL.432	-
1	16544637	16544637	HIVEP3	intronic	116	INS.667	-
1	16557092	16557092	HIVEP3	intronic	2149	INS.668	-
1	16567992	16568071	HIVEP3	intronic	79	DEL.433	-
1	16582251	16582251	HIVEP3	intronic	1424	INS.669	-
1	16588834	16588834	HIVEP3	intronic	52	INS.670	-
1	16641375	16643593	HIVEP3(dist=47618),GUCA2B(dist=41720)	intergenic	2218	DEL.434	-
1	16641968	16642951	HIVEP3(dist=48211),GUCA2B(dist=42362)	intergenic	983	DEL.435	-
1	16644324	16644421	HIVEP3(dist=50567),GUCA2B(dist=40892)	intergenic	97	DEL.436	-
1	16644435	16644435	HIVEP3(dist=50678),GUCA2B(dist=40878)	intergenic	676	INS.671	-
1	16672532	16672532	HIVEP3(dist=78775),GUCA2B(dist=12781)	intergenic	1316	INS.672	-
1	16689904	16689904	GUCA2B(dist=1187),GUCA2A(dist=2327)	intergenic	51	INS.673	-
1	16805422	16805422	FOXJ3	intronic	273	INS.674	-
1	16808405	16808405	FOXJ3	intronic	1124	INS.675	-
1	16859174	16859236	FOXJ3(dist=5608),LOC121817095(dist=16745)	intergenic	62	DEL.437	-
1	16892383	16893598	LOC121817095(dist=16060),RIMKLA(dist=34864)	intergenic	1215	DEL.438	-
1	16911166	16911656	LOC121817095(dist=34843),RIMKLA(dist=16806)	intergenic	490	DEL.439	-
1	16911170	16912356	LOC121817095(dist=34847),RIMKLA(dist=16106)	intergenic	1186	DEL.440	-
1	16911575	16912025	LOC121817095(dist=35252),RIMKLA(dist=16437)	intergenic	450	DEL.441	-
1	16911790	16912891	LOC121817095(dist=35467),RIMKLA(dist=15571)	intergenic	1101	DEL.442	-
1	16912539	16912820	LOC121817095(dist=36216),RIMKLA(dist=15642)	intergenic	281	DEL.443	-
1	16918835	16918835	LOC121817095(dist=42512),RIMKLA(dist=9627)	intergenic	111	INS.676	-
1	16958941	16959093	RIMKLA	intronic	152	DEL.444	-
1	16976491	16976588	RIMKLA(dist=12044),ZMYND12(dist=5615)	intergenic	97	DEL.445	-
1	16980105	16980105	RIMKLA(dist=15658),ZMYND12(dist=2098)	intergenic	113	INS.677	-
1	17042101	17042101	CCDC30	intronic	657	INS.678	-
1	17045237	17045237	CCDC30	intronic	139	INS.679	-
1	17082133	17082133	CCDC30	intronic	1218	INS.680	-
1	17098909	17098909	CCDC30	intronic	157	INS.681	-
1	17106972	17108338	CCDC30	intronic	1366	DEL.446	-
1	17334087	17334087	ZNF691(dist=4805),SLC2A1(dist=39741)	intergenic	66	INS.682	-
1	17334126	17334126	ZNF691(dist=4844),SLC2A1(dist=39702)	intergenic	50	INS.683	-
1	17334903	17334903	ZNF691(dist=5621),SLC2A1(dist=38925)	intergenic	661	INS.684	-
1	17466027	17466027	SLC2A1(dist=64207),LOC101103614(dist=114632)	intergenic	500	INS.685	-
1	17477260	17477598	SLC2A1(dist=75440),LOC101103614(dist=103061)	intergenic	338	DEL.447	-
1	17477266	17477266	SLC2A1(dist=75446),LOC101103614(dist=103393)	intergenic	125	INS.686	-
1	17523046	17523107	SLC2A1(dist=121226),LOC101103614(dist=57552)	intergenic	61	DEL.448	-
1	17524046	17524046	SLC2A1(dist=122226),LOC101103614(dist=56613)	intergenic	53	INS.687	-
1	17524826	17524957	SLC2A1(dist=123006),LOC101103614(dist=55702)	intergenic	131	DEL.449	-
1	17542437	17542491	SLC2A1(dist=140617),LOC101103614(dist=38168)	intergenic	54	DEL.450	-
1	17544448	17545798	SLC2A1(dist=142628),LOC101103614(dist=34861)	intergenic	1350	DEL.451	-
1	17549978	17549978	SLC2A1(dist=148158),LOC101103614(dist=30681)	intergenic	1653	INS.688	-
1	17550341	17550417	SLC2A1(dist=148521),LOC101103614(dist=30242)	intergenic	76	DEL.452	-
1	17566155	17566155	SLC2A1(dist=164335),LOC101103614(dist=14504)	intergenic	859	INS.689	-
1	17570778	17570778	SLC2A1(dist=168958),LOC101103614(dist=9881)	intergenic	264	INS.690	-
1	17604481	17604481	LOC101103614(dist=16561),LOC101104115(dist=5904)	intergenic	196	INS.691	-
1	17642748	17642748	LOC101104115(dist=31416),LOC101104364(dist=2684)	intergenic	1566	INS.692	-
1	17644557	17644557	LOC101104364	upstream	879	INS.693	-
1	17652874	17653503	LOC101104364(dist=6510),LOC101104625(dist=16177)	intergenic	629	DEL.453	-
1	17656353	17656353	LOC101104364(dist=9989),LOC101104625(dist=13327)	intergenic	143	INS.694	-
1	17686869	17686952	LOC101104878(dist=4567),LOC101107645(dist=6842)	intergenic	83	DEL.454	-
1	17708924	17708924	LOC101107645(dist=14192),LOC101107910(dist=8101)	intergenic	372	INS.695	-
1	17709332	17709332	LOC101107645(dist=14600),LOC101107910(dist=7693)	intergenic	51	INS.696	-
1	17742050	17742050	LOC101105126(dist=5756),LOC101105378(dist=17905)	intergenic	1302	INS.697	-
1	17752196	17753250	LOC101105126(dist=15902),LOC101105378(dist=6705)	intergenic	1054	DEL.455	-
1	17777168	17777168	LOC101105378(dist=16266),LOC101108173(dist=2998)	intergenic	182	INS.698	-
1	17786647	17786756	LOC101108173(dist=5543),LOC101105621(dist=18224)	intergenic	109	DEL.456	-
1	17790377	17790377	LOC101108173(dist=9273),LOC101105621(dist=14603)	intergenic	95	INS.699	-
1	17794161	17794161	LOC101108173(dist=13057),LOC101105621(dist=10819)	intergenic	306	INS.700	-
1	17808578	17808730	LOC101105621(dist=2624),LOC101108434(dist=1610)	intergenic	152	DEL.457	-
1	17809186	17809186	LOC101105621(dist=3232),LOC101108434(dist=1154)	intergenic	941	INS.701	-
1	17809529	17809529	LOC101108434	downstream	144	INS.702	-
1	17853571	17853623	EBNA1BP2	intronic	52	DEL.458	-
1	17887698	17887698	CFAP57	intronic	753	INS.703	-
1	17899274	17899274	CFAP57	intronic	272	INS.704	-
1	17968875	17969774	LOC101109657(dist=8321),TIE1(dist=11831)	intergenic	899	DEL.459	-
1	18002942	18002942	TIE1(dist=1189),LOC105607154(dist=2412)	intergenic	115	INS.705	-
1	18005274	18007277	LOC105607154	exonic	2003	DEL.460	-
1	18109733	18109807	SZT2	intronic	74	DEL.461	-
1	18154671	18155159	HYI(dist=30345),PTPRF(dist=39658)	intergenic	488	DEL.462	-
1	18154854	18155201	HYI(dist=30528),PTPRF(dist=39616)	intergenic	347	DEL.463	-
1	18157562	18157616	HYI(dist=33236),PTPRF(dist=37201)	intergenic	54	DEL.464	-
1	18161425	18161425	HYI(dist=37099),PTPRF(dist=33392)	intergenic	83	INS.706	-
1	18174700	18174700	HYI(dist=50374),PTPRF(dist=20117)	intergenic	236	INS.707	-
1	18339544	18339544	KDM4A	intronic	140	INS.708	-
1	18409605	18409663	ST3GAL3	intronic	58	DEL.465	-
1	18409824	18409824	ST3GAL3	intronic	260	INS.709	-
1	18409836	18409836	ST3GAL3	intronic	72	INS.710	-
1	18429484	18429484	ST3GAL3	intronic	125	INS.711	-
1	18429873	18429873	ST3GAL3	intronic	64	INS.712	-
1	18430466	18430466	ST3GAL3	intronic	7755	INS.713	-
1	18528270	18528270	ST3GAL3	intronic	57	INS.714	-
1	18531212	18531298	ST3GAL3	intronic	86	DEL.466	-
1	18532961	18532961	ST3GAL3	intronic	416	INS.715	-
1	18533346	18533462	ST3GAL3	intronic	116	DEL.467	-
1	18533444	18533502	ST3GAL3	intronic	58	DEL.468	-
1	18533446	18533562	ST3GAL3	intronic	116	DEL.469	-
1	18533560	18533560	ST3GAL3	intronic	116	INS.716	-
1	18711453	18711766	SLC6A9(dist=45412),KLF17(dist=41474)	intergenic	313	DEL.470	-
1	18711460	18711460	SLC6A9(dist=45419),KLF17(dist=41780)	intergenic	59	INS.717	-
1	18714045	18716211	SLC6A9(dist=48004),KLF17(dist=37029)	intergenic	2166	DEL.471	-
1	18716407	18716407	SLC6A9(dist=50366),KLF17(dist=36833)	intergenic	1377	INS.718	-
1	18744551	18744551	SLC6A9(dist=78510),KLF17(dist=8689)	intergenic	111	INS.719	-
1	18780994	18783065	KLF17(dist=12188),DMAP1(dist=85419)	intergenic	2071	DEL.472	-
1	18797586	18800352	KLF17(dist=28780),DMAP1(dist=68132)	intergenic	2766	DEL.473	-
1	18845379	18845379	KLF17(dist=76573),DMAP1(dist=23105)	intergenic	429	INS.720	-
1	18926868	18926868	ERI3	intronic	68	INS.721	-
1	18929916	18929916	ERI3(XM_042239882.1:c.*17750>0)	UTR3	99	INS.722	-
1	18946485	18946572	ERI3	intronic	87	DEL.474	-
1	18959937	18959937	ERI3	intronic	138	INS.723	-
1	19099195	19099195	RNF220	intronic	267	INS.724	-
1	19119409	19119409	RNF220	intronic	508	INS.725	RPS17
1	19179152	19179152	RNF220	intronic	92	INS.726	-
1	19384051	19385442	ARMH1	intronic	1391	DEL.475	-
1	19386444	19386444	ARMH1	intronic	382	INS.727	-
1	19400205	19400205	ARMH1	intronic	1395	INS.728	-
1	19410454	19410454	ARMH1(dist=4217),KIF2C(dist=17583)	intergenic	72	INS.729	-
1	19449722	19449722	KIF2C(dist=3817),RPS8(dist=9446)	intergenic	95	INS.730	-
1	19454737	19454737	KIF2C(dist=8832),RPS8(dist=4431)	intergenic	300	INS.731	-
1	19539882	19539882	EIF2B3	intronic	166	INS.732	-
1	19541402	19541402	LOC101115653(XM_042240150.1:c.*2980>0)	UTR3	108	INS.733	-
1	19577709	19577709	EIF2B3	intronic	137	INS.734	-
1	19589858	19589858	EIF2B3	intronic	1186	INS.735	-
1	19694039	19694647	ZSWIM5	intronic	608	DEL.476	-
1	19719272	19719272	ZSWIM5	intronic	296	INS.736	-
1	19751222	19751222	ZSWIM5	intronic	1091	INS.737	-
1	19783098	19783098	ZSWIM5	intronic	200	INS.738	-
1	19820964	19820964	ZSWIM5	intronic	380	INS.739	-
1	19826272	19826272	ZSWIM5	intronic	56	INS.740	-
1	19829485	19829485	ZSWIM5	intronic	111	INS.741	-
1	19885612	19885612	ZSWIM5(dist=47962),HPDL(dist=80576)	intergenic	345	INS.742	-
1	19944932	19944932	ZSWIM5(dist=107282),HPDL(dist=21256)	intergenic	505	INS.743	-
1	19972012	19972012	MUTYH	intronic	84	INS.744	-
1	19992774	19992774	TESK2	intronic	588	INS.745	-
1	20017976	20017976	TESK2	intronic	121	INS.746	-
1	20071008	20071008	TESK2	intronic	601	INS.747	-
1	20090324	20090324	TESK2(dist=3811),CCDC163(dist=33768)	intergenic	54	INS.748	-
1	20107978	20108452	TESK2(dist=21465),CCDC163(dist=15640)	intergenic	474	DEL.477	-
1	20188613	20188613	AKR1A1	intronic	74	INS.749	-
1	20221118	20221118	LOC101121892	intronic	228	INS.750	-
1	20258556	20258556	GPBP1L1	intronic	128	INS.751	-
1	20310112	20310112	TMEM69	intronic	95	INS.752	-
1	20367475	20367475	LOC114115297	intronic	170	INS.753	-
1	20453828	20453895	MAST2	intronic	67	DEL.478	-
1	20531035	20531297	MAST2	intronic	262	DEL.479	-
1	20551592	20551592	MAST2	intronic	81	INS.754	-
1	20560857	20560928	MAST2	intronic	71	DEL.480	-
1	20560909	20560909	MAST2	intronic	1738	INS.755	-
1	20654557	20654557	LOC101123247	intronic	721	INS.756	-
1	20733496	20733549	LOC101123247(dist=15155),P3R3URF(dist=36483)	intergenic	53	DEL.481	-
1	20810029	20810098	LURAP1(XM_015091951.3:c.*4292_*4361delins0)	UTR3	69	DEL.482	-
1	20839503	20839560	RAD54L	upstream	57	DEL.483	-
1	20901801	20901801	LRRC41	intronic	111	INS.757	-
1	20903226	20903479	LRRC41	intronic	253	DEL.484	-
1	21092536	21092893	TMEM275(dist=6963),KNCN(dist=9037)	intergenic	357	DEL.485	-
1	21193402	21218239	ATPAF1	exonic	24837	DEL.486	-
1	21216273	21216273	ATPAF1	intronic	50	INS.758	-
1	21269967	21270059	EFCAB14(dist=5358),LOC101105114(dist=68001)	intergenic	92	DEL.487	-
1	21360334	21360458	LOC101105114(dist=1549),LOC101105610(dist=54279)	intergenic	124	DEL.488	-
1	21383773	21383773	LOC101105114(dist=24988),LOC101105610(dist=30964)	intergenic	1659	INS.759	-
1	21403204	21403204	LOC101105114(dist=44419),LOC101105610(dist=11533)	intergenic	128	INS.760	-
1	21437372	21443325	LOC101105610(dist=8582),LOC114114831(dist=66116)	intergenic	5953	DEL.489	-
1	21469438	21469556	LOC101105610(dist=40648),LOC114114831(dist=39885)	intergenic	118	DEL.490	-
1	21535354	21538153	LOC114114831(dist=1912),LOC114114832(dist=21301)	intergenic	2799	DEL.491	-
1	21535949	21535949	LOC114114831(dist=2507),LOC114114832(dist=23505)	intergenic	1776	INS.761	-
1	21538201	21538687	LOC114114831(dist=4759),LOC114114832(dist=20767)	intergenic	486	DEL.492	-
1	21540559	21540559	LOC114114831(dist=7117),LOC114114832(dist=18895)	intergenic	58	INS.762	-
1	21553837	21554133	LOC114114831(dist=20395),LOC114114832(dist=5321)	intergenic	296	DEL.493	-
1	21553924	21554072	LOC114114831(dist=20482),LOC114114832(dist=5382)	intergenic	148	DEL.494	-
1	21560788	21560788	LOC114114832	intronic	627	INS.763	-
1	21803655	21803655	STIL	intronic	50	INS.764	-
1	21829508	21829570	STIL	intronic	62	DEL.495	-
1	21897771	21898328	CMPK1(dist=2553),FOXE3(dist=33239)	intergenic	557	DEL.496	-
1	22031552	22031552	FOXD2(dist=79621),TRNAS-GGA(dist=186498)	intergenic	94	INS.765	-
1	22056445	22056445	FOXD2(dist=104514),TRNAS-GGA(dist=161605)	intergenic	54	INS.766	-
1	22090962	22090962	FOXD2(dist=139031),TRNAS-GGA(dist=127088)	intergenic	52	INS.767	-
1	22349663	22350253	TRABD2B	intronic	590	DEL.497	-
1	22353008	22359101	TRABD2B	intronic	6093	DEL.498	-
1	22406860	22407741	TRABD2B	intronic	881	DEL.499	-
1	22489255	22489346	TRABD2B	intronic	91	DEL.500	-
1	22533531	22535148	TRABD2B(dist=26105),LOC101114922(dist=209263)	intergenic	1617	DEL.501	-
1	22612044	22612098	TRABD2B(dist=104618),LOC101114922(dist=132313)	intergenic	54	DEL.502	-
1	22632027	22632027	TRABD2B(dist=124601),LOC101114922(dist=112384)	intergenic	464	INS.768	-
1	22651044	22651044	TRABD2B(dist=143618),LOC101114922(dist=93367)	intergenic	1009	INS.769	-
1	22660119	22660119	TRABD2B(dist=152693),LOC101114922(dist=84292)	intergenic	4333	INS.770	-
1	22660276	22660276	TRABD2B(dist=152850),LOC101114922(dist=84135)	intergenic	4334	INS.771	-
1	22668461	22668461	TRABD2B(dist=161035),LOC101114922(dist=75950)	intergenic	3020	INS.772	-
1	22675534	22675602	TRABD2B(dist=168108),LOC101114922(dist=68809)	intergenic	68	DEL.503	-
1	22719714	22720181	TRABD2B(dist=212288),LOC101114922(dist=24230)	intergenic	467	DEL.504	-
1	22745845	22747478	LOC101114922	intronic	1633	DEL.505	-
1	22747777	22747865	LOC101114922	intronic	88	DEL.506	-
1	22756351	22756351	LOC101114922(dist=7817),SLC5A9(dist=16489)	intergenic	78	INS.773	-
1	22767670	22767780	LOC101114922(dist=19136),SLC5A9(dist=5060)	intergenic	110	DEL.507	-
1	22772632	22772632	SLC5A9	upstream	85	INS.774	-
1	22772878	22772878	SLC5A9	exonic	57	INS.775	-
1	22828542	22828848	SPATA6	intronic	306	DEL.508	-
1	22839469	22839987	SPATA6	intronic	518	DEL.509	-
1	22840024	22841006	SPATA6	intronic	982	DEL.510	-
1	22840570	22840626	SPATA6	intronic	56	DEL.511	-
1	22840610	22840663	SPATA6	intronic	53	DEL.512	-
1	22849232	22849232	SPATA6	intronic	219	INS.776	-
1	22852999	22852999	SPATA6	intronic	804	INS.777	-
1	22853917	22854037	SPATA6	intronic	120	DEL.513	-
1	22859905	22859905	SPATA6	intronic	50	INS.778	-
1	22882849	22882849	SPATA6	intronic	7788	INS.779	-
1	22900932	22900932	SPATA6	intronic	726	INS.780	-
1	22911100	22916684	SPATA6	intronic	5584	DEL.514	-
1	22917977	22918108	SPATA6	intronic	131	DEL.515	-
1	22941666	22941666	SPATA6	intronic	2444	INS.781	-
1	22941961	22941961	SPATA6	intronic	113	INS.782	-
1	22988700	22988700	SPATA6(dist=9426),LOC101115174(dist=44975)	intergenic	54	INS.783	-
1	23010219	23010219	SPATA6(dist=30945),LOC101115174(dist=23456)	intergenic	60	INS.784	-
1	23053390	23053390	LOC101115174	intronic	1839	INS.785	-
1	23068917	23069185	LOC101115174	intronic	268	DEL.516	-
1	23087993	23087993	LOC101115174	intronic	409	INS.786	-
1	23155161	23155713	LOC101115174	intronic	552	DEL.517	-
1	23155344	23155344	LOC101115174	intronic	311	INS.787	-
1	23155540	23155540	LOC101115174	intronic	75	INS.788	-
1	23155763	23156687	LOC101115174	intronic	924	DEL.518	-
1	23155765	23156152	LOC101115174	intronic	387	DEL.519	-
1	23155854	23156796	LOC101115174	intronic	942	DEL.520	-
1	23155912	23156065	LOC101115174	intronic	153	DEL.521	-
1	23156090	23156090	LOC101115174	intronic	768	INS.789	-
1	23156290	23156290	LOC101115174	intronic	285	INS.790	-
1	23156298	23156814	LOC101115174	intronic	516	DEL.522	-
1	23170336	23171629	LOC101115174	intronic	1293	DEL.523	-
1	23170373	23170373	LOC101115174	intronic	528	INS.791	-
1	23170378	23170895	LOC101115174	intronic	517	DEL.524	-
1	23170380	23170380	LOC101115174	intronic	296	INS.792	-
1	23170680	23171415	LOC101115174	intronic	735	DEL.525	-
1	23170801	23170801	LOC101115174	intronic	1220	INS.793	-
1	23171230	23171562	LOC101115174	intronic	332	DEL.526	-
1	23359994	23359994	BEND5(dist=63185),LOC114115358(dist=221779)	intergenic	67	INS.794	-
1	23415402	23417700	BEND5(dist=118593),LOC114115358(dist=164073)	intergenic	2298	DEL.527	-
1	23447418	23447418	BEND5(dist=150609),LOC114115358(dist=134355)	intergenic	502	INS.795	-
1	23451605	23451605	BEND5(dist=154796),LOC114115358(dist=130168)	intergenic	125	INS.796	-
1	23489223	23489223	BEND5(dist=192414),LOC114115358(dist=92550)	intergenic	55	INS.797	-
1	23529675	23529675	BEND5(dist=232866),LOC114115358(dist=52098)	intergenic	493	INS.798	-
1	23538528	23538528	BEND5(dist=241719),LOC114115358(dist=43245)	intergenic	710	INS.799	-
1	23567339	23567339	BEND5(dist=270530),LOC114115358(dist=14434)	intergenic	54	INS.800	-
1	23587900	23587900	LOC114115358	intronic	630	INS.801	-
1	23588972	23589027	LOC114115358	intronic	55	DEL.528	-
1	23601232	23601232	LOC114115358	intronic	195	INS.802	-
1	23666610	23666610	LOC114115358	intronic	73	INS.803	-
1	23673869	23673869	LOC114115358	intronic	267	INS.804	-
1	23690499	23690499	LOC114115358	intronic	855	INS.805	-
1	23720659	23720659	LOC114115358	intronic	552	INS.806	-
1	23733093	23733093	LOC114115358	intronic	6328	INS.807	-
1	23777017	23777017	LOC114115358	intronic	101	INS.808	-
1	23804405	23804405	LOC114115358	intronic	81	INS.809	-
1	23829670	23830187	LOC114115358	intronic	517	DEL.529	-
1	23832561	23833580	LOC114115358	intronic	1019	DEL.530	-
1	23844885	23844885	LOC114115358	intronic	103	INS.810	-
1	23876298	23876298	LOC114115358	intronic	119	INS.811	-
1	23878299	23878299	LOC114115358	intronic	1660	INS.812	-
1	23902903	23903702	LOC114115358	intronic	799	DEL.531	-
1	23985469	23985469	LOC114115358	intronic	369	INS.813	-
1	23986129	23986129	LOC114115358	intronic	1250	INS.814	-
1	23996839	23996839	LOC114115358	intronic	99	INS.815	-
1	24004065	24004065	LOC114115358	intronic	2751	INS.816	-
1	24023278	24023278	LOC114115358	intronic	7659	INS.817	-
1	24031885	24031885	LOC114115358	intronic	1253	INS.818	-
1	24049698	24050424	LOC114115358	intronic	726	DEL.532	-
1	24077092	24077092	LOC114115358	intronic	1273	INS.819	-
1	24107928	24107928	LOC114115358	intronic	527	INS.820	-
1	24111533	24111533	LOC114115358	intronic	1410	INS.821	-
1	24123424	24123480	LOC114115358	intronic	56	DEL.533	-
1	24144734	24144734	LOC114115358	intronic	209	INS.822	-
1	24163478	24164949	LOC114115358	intronic	1471	DEL.534	-
1	24171600	24171600	LOC114115358	intronic	104	INS.823	-
1	24180435	24180435	LOC114115358	intronic	412	INS.824	-
1	24189177	24189177	LOC114115358	intronic	267	INS.825	-
1	24199695	24201201	LOC114115358	intronic	1506	DEL.535	-
1	24208495	24208495	LOC114115358	intronic	5154	INS.826	-
1	24245026	24245026	LOC114115358	intronic	313	INS.827	-
1	24248636	24248636	LOC114115358	intronic	7974	INS.828	-
1	24256427	24257195	LOC114115358	intronic	768	DEL.536	-
1	24268299	24268641	LOC114115358	intronic	342	DEL.537	-
1	24283260	24283260	LOC114115358	intronic	1378	INS.829	-
1	24290507	24290507	LOC114115358	intronic	7762	INS.830	-
1	24300775	24300775	LOC114115358	intronic	1088	INS.831	-
1	24321079	24321079	LOC114115358	intronic	54	INS.832	-
1	24350034	24350034	LOC114115358	intronic	229	INS.833	-
1	24387133	24387133	LOC114115358	intronic	684	INS.834	-
1	24391117	24391117	LOC114115358	intronic	747	INS.835	-
1	24405703	24405703	LOC114115358	intronic	313	INS.836	-
1	24439769	24439912	LOC114115358	intronic	143	DEL.538	-
1	24464624	24464624	LOC114115358	intronic	5390	INS.837	-
1	24519223	24519284	LOC114115358(dist=3743),ELAVL4(dist=106092)	intergenic	61	DEL.539	-
1	24520168	24520277	LOC114115358(dist=4688),ELAVL4(dist=105099)	intergenic	109	DEL.540	-
1	24523284	24524301	LOC114115358(dist=7804),ELAVL4(dist=101075)	intergenic	1017	DEL.541	-
1	24533844	24533844	LOC114115358(dist=18364),ELAVL4(dist=91532)	intergenic	128	INS.838	-
1	24571109	24571109	LOC114115358(dist=55629),ELAVL4(dist=54267)	intergenic	193	INS.839	-
1	24635048	24635048	ELAVL4	intronic	1100	INS.840	-
1	24762144	24762194	ELAVL4(dist=44219),DMRTA2(dist=150627)	intergenic	50	DEL.542	-
1	24763676	24764116	ELAVL4(dist=45751),DMRTA2(dist=148705)	intergenic	440	DEL.543	-
1	24763720	24763720	ELAVL4(dist=45795),DMRTA2(dist=149101)	intergenic	153	INS.841	-
1	24821419	24821419	ELAVL4(dist=103494),DMRTA2(dist=91402)	intergenic	6526	INS.842	-
1	24826716	24826716	ELAVL4(dist=108791),DMRTA2(dist=86105)	intergenic	73	INS.843	-
1	24848552	24848552	ELAVL4(dist=130627),DMRTA2(dist=64269)	intergenic	193	INS.844	-
1	24877147	24877338	ELAVL4(dist=159222),DMRTA2(dist=35483)	intergenic	191	DEL.544	-
1	25029021	25029021	FAF1	intronic	97	INS.845	-
1	25177105	25177193	FAF1	intronic	88	DEL.545	-
1	25196237	25196320	FAF1	intronic	83	DEL.546	-
1	25239369	25240426	FAF1	intronic	1057	DEL.547	-
1	25350725	25351724	FAF1	intronic	999	DEL.548	-
1	25398087	25398261	FAF1	intronic	174	DEL.549	-
1	25410296	25410296	FAF1	intronic	58	INS.846	-
1	25470773	25470773	CDKN2C(dist=34007),C1H1orf185(dist=109508)	intergenic	51	INS.847	-
1	25474600	25474600	CDKN2C(dist=37834),C1H1orf185(dist=105681)	intergenic	709	INS.848	-
1	25497307	25497307	CDKN2C(dist=60541),C1H1orf185(dist=82974)	intergenic	74	INS.849	-
1	25520734	25520734	CDKN2C(dist=83968),C1H1orf185(dist=59547)	intergenic	883	INS.850	-
1	25534601	25534601	CDKN2C(dist=97835),C1H1orf185(dist=45680)	intergenic	1794	INS.851	-
1	25603273	25603273	C1H1orf185	intronic	3563	INS.852	-
1	25785928	25785928	TTC39A(dist=3936),EPS15(dist=5277)	intergenic	67	INS.853	-
1	25786017	25786017	TTC39A(dist=4025),EPS15(dist=5188)	intergenic	324	INS.854	-
1	25839959	25839959	EPS15	intronic	104	INS.855	-
1	25926599	25926599	EPS15	intronic	123	INS.856	-
1	25995333	25995436	LOC105609515,OSBPL9	intronic	103	DEL.550	-
1	25997315	25997527	LOC105609515	exonic	212	DEL.551	-
1	26061192	26061192	OSBPL9	intronic	1349	INS.857	-
1	26200943	26200943	OSBPL9	intronic	243	INS.858	-
1	26319761	26319761	NRDC	intronic	677	INS.859	-
1	26338208	26338208	NRDC(dist=17063),RAB3B(dist=20184)	intergenic	75	INS.860	-
1	26365486	26365486	RAB3B	intronic	53	INS.861	-
1	26437461	26437461	RAB3B(dist=6681),TXNDC12(dist=14657)	intergenic	65	INS.862	-
1	26516288	26516809	BTF3L4(dist=5870),ZFYVE9(dist=79762)	intergenic	521	DEL.552	-
1	26519294	26519294	BTF3L4(dist=8876),ZFYVE9(dist=77277)	intergenic	148	INS.863	-
1	26547929	26549660	BTF3L4(dist=37511),ZFYVE9(dist=46911)	intergenic	1731	DEL.553	-
1	26561382	26561382	BTF3L4(dist=50964),ZFYVE9(dist=35189)	intergenic	315	INS.864	-
1	26600196	26600196	ZFYVE9	intronic	1390	INS.865	-
1	26600213	26600265	ZFYVE9	intronic	52	DEL.554	-
1	26600282	26600282	ZFYVE9	intronic	1366	INS.866	-
1	26638854	26638854	ZFYVE9	intronic	253	INS.867	-
1	26730242	26730242	ZFYVE9	intronic	531	INS.868	RPL23
1	26814357	26814497	PRPF38A	intronic	140	DEL.555	-
1	26911478	26911577	TUT4	intronic	99	DEL.556	-
1	26916230	26916230	TUT4	intronic	568	INS.869	-
1	27038912	27038912	GPX7(dist=5098),SHISAL2A(dist=9073)	intergenic	1363	INS.870	-
1	27041795	27041795	GPX7(dist=7981),SHISAL2A(dist=6190)	intergenic	4026	INS.871	FRMD4B
1	27119115	27119115	LOC101116001	intronic	163	INS.872	-
1	27125529	27125665	LOC101116001	intronic	136	DEL.557	-
1	27125672	27125672	LOC101116001	intronic	82	INS.873	-
1	27191121	27191218	ZYG11B	intronic	97	DEL.558	-
1	27213511	27213511	ZYG11B	intronic	213	INS.874	-
1	27233127	27233127	ZYG11B(dist=2642),ZYG11A(dist=10150)	intergenic	2702	INS.875	THUMPD3
1	27233624	27233624	ZYG11B(dist=3139),ZYG11A(dist=9653)	intergenic	330	INS.876	-
1	27242536	27242631	ZYG11A	upstream	95	DEL.559	-
1	27242742	27242812	ZYG11A	upstream	70	DEL.560	-
1	27242797	27242867	ZYG11A	upstream	70	DEL.561	-
1	27242823	27242892	ZYG11A	upstream	69	DEL.562	-
1	27278857	27278939	ZYG11A	intronic	82	DEL.563	-
1	27308036	27308036	ZYG11A	intronic	127	INS.877	-
1	27334833	27334833	LOC101117028	intronic	132	INS.878	-
1	27365088	27365088	LOC101117028(dist=26967),LOC101117285(dist=48800)	intergenic	1131	INS.879	-
1	27365185	27365185	LOC101117028(dist=27064),LOC101117285(dist=48703)	intergenic	1131	INS.880	-
1	27366815	27366815	LOC101117028(dist=28694),LOC101117285(dist=47073)	intergenic	88	INS.881	-
1	27379640	27380823	LOC101117028(dist=41519),LOC101117285(dist=33065)	intergenic	1183	DEL.564	-
1	27394010	27394159	LOC101117028(dist=55889),LOC101117285(dist=19729)	intergenic	149	DEL.565	-
1	27413848	27413848	LOC101117285	upstream	166	INS.882	-
1	27414862	27414862	LOC101117285	intronic	279	INS.883	-
1	27441724	27444119	LOC101117285	intronic	2395	DEL.566	-
1	27463304	27463304	LOC101117285	intronic	71	INS.884	-
1	27503745	27503828	LOC101117285	intronic	83	DEL.567	-
1	27586856	27586856	LOC101117285(dist=76752),PODN(dist=4054)	intergenic	58	INS.885	-
1	27604734	27604734	PODN	intronic	54	INS.886	-
1	27623594	27623594	SLC1A7	intronic	69	INS.887	-
1	27706775	27706775	SLC1A7(dist=39062),CPT2(dist=17142)	intergenic	2678	INS.888	-
1	27996023	27996123	DMRTB1(dist=5794),GLIS1(dist=34102)	intergenic	100	DEL.568	-
1	28013788	28013971	DMRTB1(dist=23559),GLIS1(dist=16254)	intergenic	183	DEL.569	-
1	28025140	28025321	DMRTB1(dist=34911),GLIS1(dist=4904)	intergenic	181	DEL.570	-
1	28025230	28025321	DMRTB1(dist=35001),GLIS1(dist=4904)	intergenic	91	DEL.571	-
1	28025285	28025375	DMRTB1(dist=35056),GLIS1(dist=4850)	intergenic	90	DEL.572	-
1	28049894	28049894	GLIS1	intronic	132	INS.889	-
1	28176709	28176766	GLIS1	intronic	57	DEL.573	-
1	28259049	28259049	GLIS1	intronic	69	INS.890	-
1	28284291	28284527	GLIS1(dist=7500),NDC1(dist=17763)	intergenic	236	DEL.574	-
1	28315552	28315552	NDC1	intronic	427	INS.891	-
1	28316080	28316080	NDC1	intronic	66	INS.892	-
1	28316102	28316300	NDC1	intronic	198	DEL.575	-
1	28316172	28316172	NDC1	intronic	264	INS.893	-
1	28316367	28316466	NDC1	intronic	99	DEL.576	-
1	28331232	28331232	NDC1	intronic	260	INS.894	-
1	28430269	28430388	DIO1	intronic	119	DEL.577	-
1	28496058	28496189	HSPB11(XM_042248323.1:c.-12755_-12886delins0)	UTR5	131	DEL.578	-
1	28558225	28558225	TMEM59	intronic	62	INS.895	-
1	28647023	28647023	TCEANC2(dist=22075),CDCP2(dist=10903)	intergenic	578	INS.896	-
1	28647204	28647204	TCEANC2(dist=22256),CDCP2(dist=10722)	intergenic	103	INS.897	-
1	28670742	28670742	CDCP2	intronic	833	INS.898	-
1	28709838	28709838	LOC101121639	intronic	241	INS.899	-
1	28709986	28710088	LOC101121639	intronic	102	DEL.579	-
1	28710617	28710684	LOC101121639	intronic	67	DEL.580	-
1	28710801	28710892	LOC101121639	intronic	91	DEL.581	-
1	28711269	28711269	LOC101121639	intronic	170	INS.900	-
1	28753576	28753576	SSBP3	intronic	108	INS.901	-
1	28755789	28755789	SSBP3	intronic	322	INS.902	-
1	28800127	28800127	SSBP3	intronic	1322	INS.903	-
1	28837183	28837183	SSBP3	intronic	54	INS.904	-
1	28846007	28846007	SSBP3	intronic	178	INS.905	-
1	28868817	28869148	SSBP3	intronic	331	DEL.582	-
1	28892399	28892399	SSBP3	intronic	62	INS.906	-
1	28904440	28904440	SSBP3	intronic	126	INS.907	-
1	28930882	28930882	SSBP3(dist=21088),ACOT11(dist=77307)	intergenic	56	INS.908	-
1	28943526	28943526	SSBP3(dist=33732),ACOT11(dist=64663)	intergenic	54	INS.909	-
1	28971262	28971262	SSBP3(dist=61468),ACOT11(dist=36927)	intergenic	152	INS.910	-
1	29027785	29027920	ACOT11	intronic	135	DEL.583	-
1	29045875	29045944	ACOT11	intronic	69	DEL.584	-
1	29045929	29046002	ACOT11	intronic	73	DEL.585	-
1	29047833	29047903	ACOT11	exonic	70	DEL.586	-
1	29048409	29048517	ACOT11	intronic	108	DEL.587	-
1	29048648	29048648	ACOT11	intronic	65	INS.911	-
1	29050664	29053406	ACOT11	exonic	2742	DEL.588	-
1	29053592	29053781	ACOT11	intronic	189	DEL.589	-
1	29058668	29058949	ACOT11(XM_027970565.2:c.*4638_*4660delins0,XM_042248460.1:c.*4638_*4660delins0,XM_042248463.1:c.*4638_*4660delins0,XM_027970570.2:c.*4638_*4660delins0)	UTR3	281	DEL.590	-
1	29059806	29059806	FAM151A	intronic	189	INS.912	-
1	29063973	29075794	FAM151A	intronic	11821	DEL.591	-
1	29076463	29079601	FAM151A	intronic	3138	DEL.592	-
1	29080959	29081981	FAM151A	intronic	1022	DEL.593	-
1	29089423	29089489	FAM151A(dist=5992),MROH7(dist=20693)	intergenic	66	DEL.594	-
1	29089979	29090155	FAM151A(dist=6548),MROH7(dist=20027)	intergenic	176	DEL.595	-
1	29090940	29092931	FAM151A(dist=7509),MROH7(dist=17251)	intergenic	1991	DEL.596	-
1	29093284	29093981	FAM151A(dist=9853),MROH7(dist=16201)	intergenic	697	DEL.597	-
1	29094260	29094260	FAM151A(dist=10829),MROH7(dist=15922)	intergenic	75	INS.913	-
1	29095726	29095853	FAM151A(dist=12295),MROH7(dist=14329)	intergenic	127	DEL.598	-
1	29098704	29100182	FAM151A(dist=15273),MROH7(dist=10000)	intergenic	1478	DEL.599	-
1	29101805	29101805	FAM151A(dist=18374),MROH7(dist=8377)	intergenic	105	INS.914	-
1	29101878	29101878	FAM151A(dist=18447),MROH7(dist=8304)	intergenic	105	INS.915	-
1	29171970	29173245	TTC4	intronic	1275	DEL.600	-
1	29195168	29195168	PARS2(dist=3778),TTC22(dist=10802)	intergenic	210	INS.916	-
1	29222044	29222044	TTC22	intronic	927	INS.917	-
1	29270142	29270142	LEXM(dist=1031),DHCR24(dist=6802)	intergenic	73	INS.918	-
1	29281374	29281374	DHCR24	intronic	108	INS.919	-
1	29281375	29281483	DHCR24	intronic	108	DEL.601	-
1	29321702	29323969	DHCR24(dist=10804),TMEM61(dist=34738)	intergenic	2267	DEL.602	-
1	29351349	29351349	DHCR24(dist=40451),TMEM61(dist=7358)	intergenic	444	INS.920	-
1	29376383	29376487	BSND	upstream	104	DEL.603	-
1	29376436	29376488	BSND	upstream	52	DEL.604	-
1	29426157	29426218	USP24	intronic	61	DEL.605	-
1	29441426	29441585	USP24	intronic	159	DEL.606	-
1	29463663	29463663	USP24	intronic	59	INS.921	-
1	29476299	29476299	USP24	intronic	453	INS.922	-
1	29488729	29488872	USP24	intronic	143	DEL.607	-
1	29529451	29529451	USP24	intronic	82	INS.923	-
1	29624046	29624130	USP24(dist=34770),PHF11(dist=133224)	intergenic	84	DEL.608	-
1	29649907	29649907	USP24(dist=60631),PHF11(dist=107447)	intergenic	7766	INS.924	-
1	29680977	29681042	USP24(dist=91701),PHF11(dist=76312)	intergenic	65	DEL.609	-
1	29726957	29727104	USP24(dist=137681),PHF11(dist=30250)	intergenic	147	DEL.610	-
1	29741314	29741314	USP24(dist=152038),PHF11(dist=16040)	intergenic	158	INS.925	-
1	29759229	29759372	PHF11	intronic	143	DEL.611	-
1	29781697	29781786	PHF11(dist=19055),TRNAW-CCA(dist=74872)	intergenic	89	DEL.612	-
1	29870940	29871309	TRNAW-CCA(dist=14211),TRNAY-AUA(dist=382480)	intergenic	369	DEL.613	-
1	29935424	29935510	TRNAW-CCA(dist=78695),TRNAY-AUA(dist=318279)	intergenic	86	DEL.614	-
1	29976449	29976449	TRNAW-CCA(dist=119720),TRNAY-AUA(dist=277340)	intergenic	165	INS.926	-
1	30010983	30011582	TRNAW-CCA(dist=154254),TRNAY-AUA(dist=242207)	intergenic	599	DEL.615	-
1	30057817	30057817	TRNAW-CCA(dist=201088),TRNAY-AUA(dist=195972)	intergenic	671	INS.927	-
1	30089585	30090540	TRNAW-CCA(dist=232856),TRNAY-AUA(dist=163249)	intergenic	955	DEL.616	-
1	30133312	30133312	TRNAW-CCA(dist=276583),TRNAY-AUA(dist=120477)	intergenic	249	INS.928	-
1	30148120	30148120	TRNAW-CCA(dist=291391),TRNAY-AUA(dist=105669)	intergenic	320	INS.929	-
1	30165657	30165657	TRNAW-CCA(dist=308928),TRNAY-AUA(dist=88132)	intergenic	828	INS.930	-
1	30211773	30211773	TRNAW-CCA(dist=355044),TRNAY-AUA(dist=42016)	intergenic	750	INS.931	-
1	30221403	30221403	TRNAW-CCA(dist=364674),TRNAY-AUA(dist=32386)	intergenic	2660	INS.932	-
1	30223813	30247976	TRNAW-CCA(dist=367084),TRNAY-AUA(dist=5813)	intergenic	24163	DEL.617	-
1	30239584	30239584	TRNAW-CCA(dist=382855),TRNAY-AUA(dist=14205)	intergenic	324	INS.933	-
1	30303908	30303908	TRNAY-AUA(dist=50048),TRNAW-CCA(dist=694801)	intergenic	95	INS.934	-
1	30325308	30329135	TRNAY-AUA(dist=71448),TRNAW-CCA(dist=669574)	intergenic	3827	DEL.618	-
1	30336325	30336325	TRNAY-AUA(dist=82465),TRNAW-CCA(dist=662384)	intergenic	439	INS.935	-
1	30337552	30337630	TRNAY-AUA(dist=83692),TRNAW-CCA(dist=661079)	intergenic	78	DEL.619	-
1	30339035	30341650	TRNAY-AUA(dist=85175),TRNAW-CCA(dist=657059)	intergenic	2615	DEL.620	-
1	30343711	30343711	TRNAY-AUA(dist=89851),TRNAW-CCA(dist=654998)	intergenic	56	INS.936	-
1	30369180	30369180	TRNAY-AUA(dist=115320),TRNAW-CCA(dist=629529)	intergenic	631	INS.937	-
1	30369452	30370429	TRNAY-AUA(dist=115592),TRNAW-CCA(dist=628280)	intergenic	977	DEL.621	-
1	30384191	30384191	TRNAY-AUA(dist=130331),TRNAW-CCA(dist=614518)	intergenic	1172	INS.938	-
1	30386020	30386020	TRNAY-AUA(dist=132160),TRNAW-CCA(dist=612689)	intergenic	490	INS.939	-
1	30394092	30394092	TRNAY-AUA(dist=140232),TRNAW-CCA(dist=604617)	intergenic	1994	INS.940	-
1	30397383	30397383	TRNAY-AUA(dist=143523),TRNAW-CCA(dist=601326)	intergenic	379	INS.941	-
1	30418485	30418485	TRNAY-AUA(dist=164625),TRNAW-CCA(dist=580224)	intergenic	1841	INS.942	-
1	30429078	30429078	TRNAY-AUA(dist=175218),TRNAW-CCA(dist=569631)	intergenic	3857	INS.943	-
1	30462604	30462604	TRNAY-AUA(dist=208744),TRNAW-CCA(dist=536105)	intergenic	2596	INS.944	-
1	30488958	30488958	TRNAY-AUA(dist=235098),TRNAW-CCA(dist=509751)	intergenic	849	INS.945	-
1	30492689	30492689	TRNAY-AUA(dist=238829),TRNAW-CCA(dist=506020)	intergenic	1353	INS.946	-
1	30494781	30494781	TRNAY-AUA(dist=240921),TRNAW-CCA(dist=503928)	intergenic	386	INS.947	-
1	30495023	30495023	TRNAY-AUA(dist=241163),TRNAW-CCA(dist=503686)	intergenic	219	INS.948	-
1	30503184	30503184	TRNAY-AUA(dist=249324),TRNAW-CCA(dist=495525)	intergenic	961	INS.949	-
1	30509455	30509455	TRNAY-AUA(dist=255595),TRNAW-CCA(dist=489254)	intergenic	1989	INS.950	-
1	30518939	30518939	TRNAY-AUA(dist=265079),TRNAW-CCA(dist=479770)	intergenic	98	INS.951	-
1	30535044	30535044	TRNAY-AUA(dist=281184),TRNAW-CCA(dist=463665)	intergenic	98	INS.952	-
1	30536307	30536307	TRNAY-AUA(dist=282447),TRNAW-CCA(dist=462402)	intergenic	3165	INS.953	-
1	30538248	30538327	TRNAY-AUA(dist=284388),TRNAW-CCA(dist=460382)	intergenic	79	DEL.622	-
1	30549354	30549430	TRNAY-AUA(dist=295494),TRNAW-CCA(dist=449279)	intergenic	76	DEL.623	-
1	30553958	30553958	TRNAY-AUA(dist=300098),TRNAW-CCA(dist=444751)	intergenic	227	INS.954	-
1	30565766	30566212	TRNAY-AUA(dist=311906),TRNAW-CCA(dist=432497)	intergenic	446	DEL.624	-
1	30610227	30610227	TRNAY-AUA(dist=356367),TRNAW-CCA(dist=388482)	intergenic	194	INS.955	-
1	30612146	30612146	TRNAY-AUA(dist=358286),TRNAW-CCA(dist=386563)	intergenic	474	INS.956	-
1	30619922	30619922	TRNAY-AUA(dist=366062),TRNAW-CCA(dist=378787)	intergenic	106	INS.957	-
1	30621681	30621681	TRNAY-AUA(dist=367821),TRNAW-CCA(dist=377028)	intergenic	1163	INS.958	-
1	30624809	30624809	TRNAY-AUA(dist=370949),TRNAW-CCA(dist=373900)	intergenic	1727	INS.959	-
1	30662124	30662124	TRNAY-AUA(dist=408264),TRNAW-CCA(dist=336585)	intergenic	1416	INS.960	-
1	30716722	30716722	TRNAY-AUA(dist=462862),TRNAW-CCA(dist=281987)	intergenic	82	INS.961	-
1	30742279	30742279	TRNAY-AUA(dist=488419),TRNAW-CCA(dist=256430)	intergenic	1697	INS.962	-
1	30764352	30764352	TRNAY-AUA(dist=510492),TRNAW-CCA(dist=234357)	intergenic	1278	INS.963	-
1	30766016	30766016	TRNAY-AUA(dist=512156),TRNAW-CCA(dist=232693)	intergenic	96	INS.964	-
1	30782218	30785369	TRNAY-AUA(dist=528358),TRNAW-CCA(dist=213340)	intergenic	3151	DEL.625	-
1	30783100	30783100	TRNAY-AUA(dist=529240),TRNAW-CCA(dist=215609)	intergenic	4471	INS.965	-
1	30796339	30796339	TRNAY-AUA(dist=542479),TRNAW-CCA(dist=202370)	intergenic	151	INS.966	-
1	30807463	30807732	TRNAY-AUA(dist=553603),TRNAW-CCA(dist=190977)	intergenic	269	DEL.626	-
1	30807526	30807526	TRNAY-AUA(dist=553666),TRNAW-CCA(dist=191183)	intergenic	125	INS.967	-
1	30814753	30814753	TRNAY-AUA(dist=560893),TRNAW-CCA(dist=183956)	intergenic	78	INS.968	-
1	30817637	30817637	TRNAY-AUA(dist=563777),TRNAW-CCA(dist=181072)	intergenic	944	INS.969	-
1	30842431	30842431	TRNAY-AUA(dist=588571),TRNAW-CCA(dist=156278)	intergenic	65	INS.970	-
1	30867176	30867716	TRNAY-AUA(dist=613316),TRNAW-CCA(dist=130993)	intergenic	540	DEL.627	-
1	30890290	30890290	TRNAY-AUA(dist=636430),TRNAW-CCA(dist=108419)	intergenic	144	INS.971	-
1	30989499	30989499	TRNAY-AUA(dist=735639),TRNAW-CCA(dist=9210)	intergenic	87	INS.972	-
1	31084299	31084299	PLPP3	intronic	790	INS.973	-
1	31163958	31163958	PLPP3(dist=41462),PRKAA2(dist=18753)	intergenic	453	INS.974	-
1	31173874	31173926	PLPP3(dist=51378),PRKAA2(dist=8785)	intergenic	52	DEL.628	-
1	31174234	31174392	PLPP3(dist=51738),PRKAA2(dist=8319)	intergenic	158	DEL.629	-
1	31196173	31197634	PRKAA2	intronic	1461	DEL.630	-
1	31222650	31222650	PRKAA2	intronic	7756	INS.975	-
1	31225656	31225766	PRKAA2	intronic	110	DEL.631	-
1	31230604	31230604	PRKAA2	intronic	1869	INS.976	-
1	31241240	31241478	PRKAA2	intronic	238	DEL.632	-
1	31241722	31241722	PRKAA2	intronic	261	INS.977	-
1	31253336	31253336	PRKAA2	intronic	2239	INS.978	-
1	31273502	31273502	FYB2	intronic	2594	INS.979	-
1	31273503	31273503	FYB2	intronic	844	INS.980	-
1	31273509	31273509	FYB2	intronic	140	INS.981	-
1	31312949	31312949	FYB2	intronic	125	INS.982	-
1	31313022	31313022	FYB2	intronic	1894	INS.983	-
1	31331142	31331475	FYB2	intronic	333	DEL.633	-
1	31350549	31350692	FYB2	intronic	143	DEL.634	-
1	31375724	31375724	FYB2	intronic	62	INS.984	-
1	31436614	31436669	FYB2(dist=34418),C8A(dist=14421)	intergenic	55	DEL.635	-
1	31460466	31460698	C8A	intronic	232	DEL.636	-
1	31511421	31511472	C8A	intronic	51	DEL.637	-
1	31530222	31530222	C8A(XM_042248615.1:c.*2590>0)	UTR3	1086	INS.985	-
1	31659601	31659601	DAB1	intronic	54	INS.986	-
1	31667455	31667507	DAB1	intronic	52	DEL.638	-
1	31688486	31688995	DAB1	intronic	509	DEL.639	-
1	31710833	31710896	DAB1	intronic	63	DEL.640	-
1	31724924	31724924	DAB1	intronic	772	INS.987	-
1	31739975	31739975	DAB1	intronic	412	INS.988	-
1	31807930	31807930	DAB1	intronic	129	INS.989	-
1	31845440	31845499	DAB1	intronic	59	DEL.641	-
1	31909983	31909983	DAB1	intronic	1711	INS.990	-
1	31927893	31927893	DAB1	intronic	73	INS.991	-
1	31970428	31973582	DAB1	intronic	3154	DEL.642	-
1	31982450	31982450	DAB1	intronic	110	INS.992	-
1	31982872	31982872	DAB1	intronic	80	INS.993	-
1	31998388	31998388	DAB1	intronic	2363	INS.994	-
1	32033672	32033672	DAB1	intronic	1675	INS.995	-
1	32080562	32081454	DAB1(dist=2632),TRNAC-ACA(dist=398904)	intergenic	892	DEL.643	-
1	32117852	32117852	DAB1(dist=39922),TRNAC-ACA(dist=362506)	intergenic	117	INS.996	-
1	32137185	32137185	DAB1(dist=59255),TRNAC-ACA(dist=343173)	intergenic	562	INS.997	-
1	32150723	32150723	DAB1(dist=72793),TRNAC-ACA(dist=329635)	intergenic	1196	INS.998	-
1	32154274	32154547	DAB1(dist=76344),TRNAC-ACA(dist=325811)	intergenic	273	DEL.644	-
1	32166700	32166700	DAB1(dist=88770),TRNAC-ACA(dist=313658)	intergenic	310	INS.999	-
1	32180930	32181312	DAB1(dist=103000),TRNAC-ACA(dist=299046)	intergenic	382	DEL.645	-
1	32183128	32183885	DAB1(dist=105198),TRNAC-ACA(dist=296473)	intergenic	757	DEL.646	-
1	32183841	32183841	DAB1(dist=105911),TRNAC-ACA(dist=296517)	intergenic	119	INS.1000	-
1	32214433	32214433	DAB1(dist=136503),TRNAC-ACA(dist=265925)	intergenic	1527	INS.1001	-
1	32291178	32291178	DAB1(dist=213248),TRNAC-ACA(dist=189180)	intergenic	2192	INS.1002	-
1	32297187	32297261	DAB1(dist=219257),TRNAC-ACA(dist=183097)	intergenic	74	DEL.647	-
1	32334023	32334165	DAB1(dist=256093),TRNAC-ACA(dist=146193)	intergenic	142	DEL.648	-
1	32375779	32376932	DAB1(dist=297849),TRNAC-ACA(dist=103426)	intergenic	1153	DEL.649	-
1	32388104	32388104	DAB1(dist=310174),TRNAC-ACA(dist=92254)	intergenic	877	INS.1003	-
1	32410188	32410188	DAB1(dist=332258),TRNAC-ACA(dist=70170)	intergenic	970	INS.1004	-
1	32427470	32427470	DAB1(dist=349540),TRNAC-ACA(dist=52888)	intergenic	578	INS.1005	-
1	32431058	32431058	DAB1(dist=353128),TRNAC-ACA(dist=49300)	intergenic	955	INS.1006	-
1	32431064	32431064	DAB1(dist=353134),TRNAC-ACA(dist=49294)	intergenic	8719	INS.1007	-
1	32455359	32455359	DAB1(dist=377429),TRNAC-ACA(dist=24999)	intergenic	51	INS.1008	-
1	32471100	32471100	DAB1(dist=393170),TRNAC-ACA(dist=9258)	intergenic	1750	INS.1009	-
1	32486282	32486282	TRNAC-ACA(dist=5853),OMA1(dist=734868)	intergenic	7804	INS.1010	-
1	32488804	32488804	TRNAC-ACA(dist=8375),OMA1(dist=732346)	intergenic	752	INS.1011	-
1	32508399	32508399	TRNAC-ACA(dist=27970),OMA1(dist=712751)	intergenic	331	INS.1012	-
1	32524247	32524722	TRNAC-ACA(dist=43818),OMA1(dist=696428)	intergenic	475	DEL.650	-
1	32541133	32541555	TRNAC-ACA(dist=60704),OMA1(dist=679595)	intergenic	422	DEL.651	-
1	32556835	32557100	TRNAC-ACA(dist=76406),OMA1(dist=664050)	intergenic	265	DEL.652	-
1	32583567	32583567	TRNAC-ACA(dist=103138),OMA1(dist=637583)	intergenic	6799	INS.1013	-
1	32588670	32588769	TRNAC-ACA(dist=108241),OMA1(dist=632381)	intergenic	99	DEL.653	-
1	32612268	32612268	TRNAC-ACA(dist=131839),OMA1(dist=608882)	intergenic	54	INS.1014	-
1	32619006	32619138	TRNAC-ACA(dist=138577),OMA1(dist=602012)	intergenic	132	DEL.654	-
1	32637495	32637495	TRNAC-ACA(dist=157066),OMA1(dist=583655)	intergenic	2797	INS.1015	-
1	32704020	32704020	TRNAC-ACA(dist=223591),OMA1(dist=517130)	intergenic	51	INS.1016	-
1	32710794	32710794	TRNAC-ACA(dist=230365),OMA1(dist=510356)	intergenic	2028	INS.1017	-
1	32710983	32710983	TRNAC-ACA(dist=230554),OMA1(dist=510167)	intergenic	2030	INS.1018	-
1	32711053	32711053	TRNAC-ACA(dist=230624),OMA1(dist=510097)	intergenic	2025	INS.1019	-
1	32711645	32711826	TRNAC-ACA(dist=231216),OMA1(dist=509324)	intergenic	181	DEL.655	-
1	32725048	32725048	TRNAC-ACA(dist=244619),OMA1(dist=496102)	intergenic	772	INS.1020	-
1	32733743	32733795	TRNAC-ACA(dist=253314),OMA1(dist=487355)	intergenic	52	DEL.656	-
1	32764036	32764036	TRNAC-ACA(dist=283607),OMA1(dist=457114)	intergenic	123	INS.1021	-
1	32823184	32823184	TRNAC-ACA(dist=342755),OMA1(dist=397966)	intergenic	133	INS.1022	-
1	32894166	32894376	TRNAC-ACA(dist=413737),OMA1(dist=326774)	intergenic	210	DEL.657	-
1	32927715	32928249	TRNAC-ACA(dist=447286),OMA1(dist=292901)	intergenic	534	DEL.658	-
1	32953079	32953079	TRNAC-ACA(dist=472650),OMA1(dist=268071)	intergenic	373	INS.1023	-
1	32960959	32960959	TRNAC-ACA(dist=480530),OMA1(dist=260191)	intergenic	908	INS.1024	-
1	32993051	32993171	TRNAC-ACA(dist=512622),OMA1(dist=227979)	intergenic	120	DEL.659	-
1	33021078	33021078	TRNAC-ACA(dist=540649),OMA1(dist=200072)	intergenic	179	INS.1025	-
1	33030622	33030867	TRNAC-ACA(dist=550193),OMA1(dist=190283)	intergenic	245	DEL.660	-
1	33036043	33036043	TRNAC-ACA(dist=555614),OMA1(dist=185107)	intergenic	148	INS.1026	-
1	33058897	33059090	TRNAC-ACA(dist=578468),OMA1(dist=162060)	intergenic	193	DEL.661	-
1	33069897	33070039	TRNAC-ACA(dist=589468),OMA1(dist=151111)	intergenic	142	DEL.662	-
1	33096707	33096707	TRNAC-ACA(dist=616278),OMA1(dist=124443)	intergenic	1664	INS.1027	-
1	33105423	33105515	TRNAC-ACA(dist=624994),OMA1(dist=115635)	intergenic	92	DEL.663	-
1	33110348	33110671	TRNAC-ACA(dist=629919),OMA1(dist=110479)	intergenic	323	DEL.664	-
1	33130858	33130858	TRNAC-ACA(dist=650429),OMA1(dist=90292)	intergenic	51	INS.1028	-
1	33151300	33151376	TRNAC-ACA(dist=670871),OMA1(dist=69774)	intergenic	76	DEL.665	-
1	33157803	33157803	TRNAC-ACA(dist=677374),OMA1(dist=63347)	intergenic	5854	INS.1029	-
1	33161898	33162065	TRNAC-ACA(dist=681469),OMA1(dist=59085)	intergenic	167	DEL.666	-
1	33278839	33279019	OMA1	intronic	180	DEL.667	-
1	33285668	33285668	OMA1(dist=2312),TACSTD2(dist=18353)	intergenic	71	INS.1030	-
1	33314450	33314640	TACSTD2(dist=8636),MYSM1(dist=57146)	intergenic	190	DEL.668	-
1	33320589	33320708	TACSTD2(dist=14775),MYSM1(dist=51078)	intergenic	119	DEL.669	-
1	33326201	33326344	TACSTD2(dist=20387),MYSM1(dist=45442)	intergenic	143	DEL.670	-
1	33335168	33335168	TACSTD2(dist=29354),MYSM1(dist=36618)	intergenic	792	INS.1031	-
1	33394788	33395850	MYSM1	intronic	1062	DEL.671	-
1	33545633	33545759	JUN(dist=48970),TRNAG-CCC(dist=33441)	intergenic	126	DEL.672	-
1	33551474	33551474	JUN(dist=54811),TRNAG-CCC(dist=27726)	intergenic	161	INS.1032	-
1	33664381	33664381	TRNAG-CCC(dist=85109),TRNAS-GGA(dist=18314)	intergenic	55	INS.1033	-
1	33679625	33679625	TRNAG-CCC(dist=100353),TRNAS-GGA(dist=3070)	intergenic	1907	INS.1034	-
1	33706488	33706488	TRNAS-GGA(dist=23722),FGGY(dist=340447)	intergenic	113	INS.1035	-
1	33712382	33712382	TRNAS-GGA(dist=29616),FGGY(dist=334553)	intergenic	178	INS.1036	-
1	33715424	33715424	TRNAS-GGA(dist=32658),FGGY(dist=331511)	intergenic	92	INS.1037	-
1	33738821	33738895	TRNAS-GGA(dist=56055),FGGY(dist=308040)	intergenic	74	DEL.673	-
1	33772527	33772527	TRNAS-GGA(dist=89761),FGGY(dist=274408)	intergenic	456	INS.1038	-
1	33788634	33788921	TRNAS-GGA(dist=105868),FGGY(dist=258014)	intergenic	287	DEL.674	-
1	33788843	33788905	TRNAS-GGA(dist=106077),FGGY(dist=258030)	intergenic	62	DEL.675	-
1	33788905	33788905	TRNAS-GGA(dist=106139),FGGY(dist=258030)	intergenic	112	INS.1039	-
1	33839611	33839611	TRNAS-GGA(dist=156845),FGGY(dist=207324)	intergenic	55	INS.1040	-
1	33858159	33858159	TRNAS-GGA(dist=175393),FGGY(dist=188776)	intergenic	229	INS.1041	-
1	33872832	33872832	TRNAS-GGA(dist=190066),FGGY(dist=174103)	intergenic	71	INS.1042	-
1	33890233	33890233	TRNAS-GGA(dist=207467),FGGY(dist=156702)	intergenic	80	INS.1043	-
1	33933426	33935057	TRNAS-GGA(dist=250660),FGGY(dist=111878)	intergenic	1631	DEL.676	-
1	33936851	33936851	TRNAS-GGA(dist=254085),FGGY(dist=110084)	intergenic	1956	INS.1044	-
1	33954725	33954725	TRNAS-GGA(dist=271959),FGGY(dist=92210)	intergenic	3087	INS.1045	-
1	33986332	33986332	TRNAS-GGA(dist=303566),FGGY(dist=60603)	intergenic	52	INS.1046	-
1	33991422	33991422	TRNAS-GGA(dist=308656),FGGY(dist=55513)	intergenic	297	INS.1047	-
1	34009930	34009930	TRNAS-GGA(dist=327164),FGGY(dist=37005)	intergenic	91	INS.1048	-
1	34055736	34061165	FGGY	intronic	5429	DEL.677	-
1	34058797	34058797	FGGY	intronic	65	INS.1049	-
1	34076680	34076680	FGGY	intronic	1479	INS.1050	-
1	34105605	34105605	FGGY	intronic	1408	INS.1051	-
1	34132796	34132796	FGGY	intronic	105	INS.1052	-
1	34137519	34138530	FGGY	intronic	1011	DEL.678	-
1	34141196	34141196	FGGY	intronic	676	INS.1053	-
1	34141377	34141377	FGGY	intronic	1398	INS.1054	-
1	34141390	34141390	FGGY	intronic	118	INS.1055	-
1	34141850	34141850	FGGY	intronic	180	INS.1056	-
1	34142075	34142075	FGGY	intronic	51	INS.1057	-
1	34142079	34142079	FGGY	intronic	61	INS.1058	-
1	34175762	34175762	FGGY	intronic	2308	INS.1059	-
1	34222653	34226724	FGGY	intronic	4071	DEL.679	-
1	34225805	34225805	FGGY	intronic	348	INS.1060	-
1	34232101	34232101	FGGY	intronic	865	INS.1061	-
1	34235992	34235992	FGGY	intronic	541	INS.1062	-
1	34285575	34285575	FGGY	intronic	330	INS.1063	-
1	34306727	34306727	FGGY	intronic	65	INS.1064	-
1	34321803	34321989	FGGY	intronic	186	DEL.680	-
1	34321942	34321942	FGGY	intronic	169	INS.1065	-
1	34325324	34325596	FGGY	intronic	272	DEL.681	-
1	34439330	34439330	FGGY	intronic	444	INS.1066	-
1	34476269	34476269	FGGY	intronic	118	INS.1067	-
1	34522282	34526415	FGGY	intronic	4133	DEL.682	-
1	34537312	34537312	FGGY	intronic	2009	INS.1068	-
1	34583630	34583630	FGGY	intronic	2167	INS.1069	-
1	34594825	34594825	FGGY	intronic	186	INS.1070	-
1	34630815	34630815	FGGY	intronic	2739	INS.1071	-
1	34631879	34631879	FGGY	intronic	405	INS.1072	-
1	34689346	34689346	FGGY(dist=16913),HOOK1(dist=32903)	intergenic	405	INS.1073	-
1	34702917	34703020	FGGY(dist=30484),HOOK1(dist=19229)	intergenic	103	DEL.683	-
1	34720972	34720972	FGGY(dist=48539),HOOK1(dist=1277)	intergenic	75	INS.1074	-
1	34827729	34827729	LOC101121563	intronic	123	INS.1075	-
1	34828768	34828768	LOC101121563	intronic	1750	INS.1076	-
1	34838199	34838199	LOC101121563	upstream	207	INS.1077	-
1	34844269	34844532	LOC101121820(XM_042248782.1:c.*609_*546delins0)	UTR3	263	DEL.684	-
1	34848258	34848258	LOC101121820	intronic	189	INS.1078	-
1	34849001	34849192	LOC101121820	intronic	191	DEL.685	-
1	34888231	34889008	LOC101121820(dist=7976),CYP2J(dist=79551)	intergenic	777	DEL.686	-
1	34933210	34933210	LOC101121820(dist=52955),CYP2J(dist=35349)	intergenic	467	INS.1079	-
1	34954365	34954365	LOC101121820(dist=74110),CYP2J(dist=14194)	intergenic	3522	INS.1080	-
1	35014473	35014473	CYP2J	intronic	85	INS.1081	-
1	35022629	35022629	CYP2J	intronic	246	INS.1082	-
1	35022694	35022694	CYP2J	intronic	77	INS.1083	-
1	35035282	35035427	CYP2J	intronic	145	DEL.687	-
1	35042349	35042349	CYP2J(dist=6484),C1H1orf87(dist=24413)	intergenic	143	INS.1084	-
1	35042763	35042763	CYP2J(dist=6898),C1H1orf87(dist=23999)	intergenic	143	INS.1085	-
1	35071468	35071468	C1H1orf87	intronic	118	INS.1086	-
1	35071686	35071686	C1H1orf87	intronic	191	INS.1087	-
1	35071800	35071800	C1H1orf87	intronic	133	INS.1088	-
1	35108250	35108250	C1H1orf87	intronic	148	INS.1089	-
1	35110604	35110604	C1H1orf87	intronic	103	INS.1090	-
1	35152608	35152608	C1H1orf87	intronic	103	INS.1091	-
1	35164627	35164627	C1H1orf87	intronic	901	INS.1092	RPS4X
1	35227091	35227091	C1H1orf87(dist=51162),TRNAS-GGA(dist=302079)	intergenic	4472	INS.1093	-
1	35234891	35237132	C1H1orf87(dist=58962),TRNAS-GGA(dist=292038)	intergenic	2241	DEL.688	-
1	35248260	35251123	C1H1orf87(dist=72331),TRNAS-GGA(dist=278047)	intergenic	2863	DEL.689	-
1	35303126	35303126	C1H1orf87(dist=127197),TRNAS-GGA(dist=226044)	intergenic	305	INS.1094	-
1	35313517	35313517	C1H1orf87(dist=137588),TRNAS-GGA(dist=215653)	intergenic	248	INS.1095	-
1	35393385	35399646	C1H1orf87(dist=217456),TRNAS-GGA(dist=129524)	intergenic	6261	DEL.690	-
1	35400599	35400690	C1H1orf87(dist=224670),TRNAS-GGA(dist=128480)	intergenic	91	DEL.691	-
1	35402383	35402383	C1H1orf87(dist=226454),TRNAS-GGA(dist=126787)	intergenic	58	INS.1096	-
1	35446745	35446745	C1H1orf87(dist=270816),TRNAS-GGA(dist=82425)	intergenic	2554	INS.1097	-
1	35453769	35453769	C1H1orf87(dist=277840),TRNAS-GGA(dist=75401)	intergenic	954	INS.1098	-
1	35459552	35459552	C1H1orf87(dist=283623),TRNAS-GGA(dist=69618)	intergenic	85	INS.1099	-
1	35460518	35460518	C1H1orf87(dist=284589),TRNAS-GGA(dist=68652)	intergenic	610	INS.1100	-
1	35470533	35470533	C1H1orf87(dist=294604),TRNAS-GGA(dist=58637)	intergenic	1792	INS.1101	-
1	35480113	35480113	C1H1orf87(dist=304184),TRNAS-GGA(dist=49057)	intergenic	182	INS.1102	-
1	35494182	35494392	C1H1orf87(dist=318253),TRNAS-GGA(dist=34778)	intergenic	210	DEL.692	-
1	35495170	35495170	C1H1orf87(dist=319241),TRNAS-GGA(dist=34000)	intergenic	913	INS.1103	-
1	35501700	35501700	C1H1orf87(dist=325771),TRNAS-GGA(dist=27470)	intergenic	1187	INS.1104	-
1	35504808	35504808	C1H1orf87(dist=328879),TRNAS-GGA(dist=24362)	intergenic	86	INS.1105	-
1	35505479	35505479	C1H1orf87(dist=329550),TRNAS-GGA(dist=23691)	intergenic	284	INS.1106	-
1	35505541	35505541	C1H1orf87(dist=329612),TRNAS-GGA(dist=23629)	intergenic	590	INS.1107	-
1	35515518	35515518	C1H1orf87(dist=339589),TRNAS-GGA(dist=13652)	intergenic	3363	INS.1108	-
1	35515531	35515531	C1H1orf87(dist=339602),TRNAS-GGA(dist=13639)	intergenic	5853	INS.1109	-
1	35556494	35556973	TRNAS-GGA(dist=27253),NFIA(dist=761435)	intergenic	479	DEL.693	-
1	35564272	35567020	TRNAS-GGA(dist=35031),NFIA(dist=751388)	intergenic	2748	DEL.694	-
1	35579336	35579592	TRNAS-GGA(dist=50095),NFIA(dist=738816)	intergenic	256	DEL.695	-
1	35615246	35615668	TRNAS-GGA(dist=86005),NFIA(dist=702740)	intergenic	422	DEL.696	-
1	35626691	35626758	TRNAS-GGA(dist=97450),NFIA(dist=691650)	intergenic	67	DEL.697	-
1	35657565	35658641	TRNAS-GGA(dist=128324),NFIA(dist=659767)	intergenic	1076	DEL.698	-
1	35657582	35666435	TRNAS-GGA(dist=128341),NFIA(dist=651973)	intergenic	8853	DEL.699	-
1	35669709	35669709	TRNAS-GGA(dist=140468),NFIA(dist=648699)	intergenic	1316	INS.1110	-
1	35687468	35687468	TRNAS-GGA(dist=158227),NFIA(dist=630940)	intergenic	192	INS.1111	-
1	35693618	35693671	TRNAS-GGA(dist=164377),NFIA(dist=624737)	intergenic	53	DEL.700	-
1	35739454	35739454	TRNAS-GGA(dist=210213),NFIA(dist=578954)	intergenic	815	INS.1112	-
1	35745017	35745246	TRNAS-GGA(dist=215776),NFIA(dist=573162)	intergenic	229	DEL.701	-
1	35758715	35758767	TRNAS-GGA(dist=229474),NFIA(dist=559641)	intergenic	52	DEL.702	-
1	35758742	35758742	TRNAS-GGA(dist=229501),NFIA(dist=559666)	intergenic	52	INS.1113	-
1	35760984	35762206	TRNAS-GGA(dist=231743),NFIA(dist=556202)	intergenic	1222	DEL.703	-
1	35810000	35811763	TRNAS-GGA(dist=280759),NFIA(dist=506645)	intergenic	1763	DEL.704	-
1	35873226	35873303	TRNAS-GGA(dist=343985),NFIA(dist=445105)	intergenic	77	DEL.705	-
1	35873970	35873970	TRNAS-GGA(dist=344729),NFIA(dist=444438)	intergenic	119	INS.1114	-
1	35876567	35876567	TRNAS-GGA(dist=347326),NFIA(dist=441841)	intergenic	7731	INS.1115	-
1	35901343	35901343	TRNAS-GGA(dist=372102),NFIA(dist=417065)	intergenic	7764	INS.1116	-
1	35920933	35921028	TRNAS-GGA(dist=391692),NFIA(dist=397380)	intergenic	95	DEL.706	-
1	35925305	35925450	TRNAS-GGA(dist=396064),NFIA(dist=392958)	intergenic	145	DEL.707	-
1	35943751	35944874	TRNAS-GGA(dist=414510),NFIA(dist=373534)	intergenic	1123	DEL.708	-
1	35944629	35944842	TRNAS-GGA(dist=415388),NFIA(dist=373566)	intergenic	213	DEL.709	-
1	35945182	35945239	TRNAS-GGA(dist=415941),NFIA(dist=373169)	intergenic	57	DEL.710	-
1	35960894	35960894	TRNAS-GGA(dist=431653),NFIA(dist=357514)	intergenic	521	INS.1117	-
1	35966248	35966248	TRNAS-GGA(dist=437007),NFIA(dist=352160)	intergenic	868	INS.1118	-
1	35974596	35974596	TRNAS-GGA(dist=445355),NFIA(dist=343812)	intergenic	7573	INS.1119	-
1	35976188	35976188	TRNAS-GGA(dist=446947),NFIA(dist=342220)	intergenic	211	INS.1120	-
1	35976196	35976196	TRNAS-GGA(dist=446955),NFIA(dist=342212)	intergenic	7792	INS.1121	-
1	35979623	35980270	TRNAS-GGA(dist=450382),NFIA(dist=338138)	intergenic	647	DEL.711	-
1	35991125	35991350	TRNAS-GGA(dist=461884),NFIA(dist=327058)	intergenic	225	DEL.712	-
1	35994415	35994415	TRNAS-GGA(dist=465174),NFIA(dist=323993)	intergenic	60	INS.1122	-
1	36026251	36026251	TRNAS-GGA(dist=497010),NFIA(dist=292157)	intergenic	929	INS.1123	-
1	36040749	36040969	TRNAS-GGA(dist=511508),NFIA(dist=277439)	intergenic	220	DEL.713	-
1	36042801	36042801	TRNAS-GGA(dist=513560),NFIA(dist=275607)	intergenic	582	INS.1124	-
1	36043685	36043685	TRNAS-GGA(dist=514444),NFIA(dist=274723)	intergenic	1281	INS.1125	-
1	36048344	36048344	TRNAS-GGA(dist=519103),NFIA(dist=270064)	intergenic	170	INS.1126	-
1	36060085	36060085	TRNAS-GGA(dist=530844),NFIA(dist=258323)	intergenic	1240	INS.1127	-
1	36152485	36152485	TRNAS-GGA(dist=623244),NFIA(dist=165923)	intergenic	787	INS.1128	-
1	36204018	36204516	TRNAS-GGA(dist=674777),NFIA(dist=113892)	intergenic	498	DEL.714	-
1	36264408	36266052	TRNAS-GGA(dist=735167),NFIA(dist=52356)	intergenic	1644	DEL.715	-
1	36266296	36266433	TRNAS-GGA(dist=737055),NFIA(dist=51975)	intergenic	137	DEL.716	-
1	36268699	36268783	TRNAS-GGA(dist=739458),NFIA(dist=49625)	intergenic	84	DEL.717	-
1	36289266	36289266	TRNAS-GGA(dist=760025),NFIA(dist=29142)	intergenic	239	INS.1129	-
1	36347319	36347319	NFIA	intronic	157	INS.1130	-
1	36388544	36388544	NFIA	intronic	100	INS.1131	-
1	36405889	36405889	NFIA	intronic	196	INS.1132	-
1	36410071	36410071	NFIA	intronic	153	INS.1133	-
1	36433927	36433927	NFIA	intronic	119	INS.1134	-
1	36449908	36449908	NFIA	intronic	144	INS.1135	-
1	36450291	36450291	NFIA	intronic	52	INS.1136	-
1	36594187	36594187	NFIA	intronic	79	INS.1137	-
1	36603441	36603441	NFIA	intronic	138	INS.1138	-
1	36646057	36646057	NFIA	intronic	78	INS.1139	-
1	36860611	36860611	LOC101122828(dist=53822),TM2D1(dist=54643)	intergenic	114	INS.1140	-
1	36882818	36883783	LOC101122828(dist=76029),TM2D1(dist=31471)	intergenic	965	DEL.718	-
1	36941801	36941801	TM2D1	intronic	298	INS.1141	-
1	36941819	36941819	TM2D1	intronic	198	INS.1142	-
1	36941916	36941916	TM2D1	intronic	69	INS.1143	-
1	37063701	37063701	PATJ	intronic	1388	INS.1144	-
1	37106052	37106052	PATJ	intronic	60	INS.1145	-
1	37107997	37108069	PATJ	intronic	72	DEL.719	-
1	37108157	37108157	PATJ	intronic	254	INS.1146	-
1	37108161	37108161	PATJ	intronic	707	INS.1147	-
1	37108163	37108163	PATJ	intronic	119	INS.1148	-
1	37123634	37123777	PATJ	intronic	143	DEL.720	-
1	37128316	37128316	PATJ	intronic	897	INS.1149	-
1	37131699	37131699	PATJ	intronic	99	INS.1150	-
1	37183868	37184608	PATJ	intronic	740	DEL.721	-
1	37193772	37193913	PATJ	intronic	141	DEL.722	-
1	37205084	37205084	PATJ	intronic	60	INS.1151	-
1	37220176	37220176	PATJ	intronic	468	INS.1152	-
1	37220505	37220588	PATJ	intronic	83	DEL.723	-
1	37226038	37226038	PATJ	intronic	778	INS.1153	-
1	37234536	37234536	PATJ	intronic	74	INS.1154	-
1	37242366	37242366	PATJ	intronic	217	INS.1155	-
1	37257359	37257359	PATJ	intronic	1947	INS.1156	-
1	37304630	37304729	PATJ	intronic	99	DEL.724	-
1	37400768	37400898	PATJ(dist=39674),LOC121819447(dist=30122)	intergenic	130	DEL.725	-
1	37422353	37422353	PATJ(dist=61259),LOC121819447(dist=8667)	intergenic	92	INS.1157	-
1	37476102	37476102	LOC121819447(dist=41488),LOC121819452(dist=49949)	intergenic	530	INS.1158	-
1	37481821	37483400	LOC121819447(dist=47207),LOC121819452(dist=42651)	intergenic	1579	DEL.726	-
1	37507669	37507669	LOC121819447(dist=73055),LOC121819452(dist=18382)	intergenic	2546	INS.1159	-
1	37522404	37522523	LOC121819447(dist=87790),LOC121819452(dist=3528)	intergenic	119	DEL.727	-
1	37539394	37539450	LOC121819452(dist=3908),KANK4(dist=126148)	intergenic	56	DEL.728	-
1	37541613	37541613	LOC121819452(dist=6127),KANK4(dist=123985)	intergenic	409	INS.1160	-
1	37563752	37563867	LOC121819452(dist=28266),KANK4(dist=101731)	intergenic	115	DEL.729	-
1	37610332	37610414	LOC121819452(dist=74846),KANK4(dist=55184)	intergenic	82	DEL.730	-
1	37614222	37614222	LOC121819452(dist=78736),KANK4(dist=51376)	intergenic	328	INS.1161	-
1	37614254	37614254	LOC121819452(dist=78768),KANK4(dist=51344)	intergenic	282	INS.1162	-
1	37614338	37614338	LOC121819452(dist=78852),KANK4(dist=51260)	intergenic	96	INS.1163	-
1	37615547	37615625	LOC121819452(dist=80061),KANK4(dist=49973)	intergenic	78	DEL.731	-
1	37711750	37711750	KANK4	intronic	119	INS.1164	-
1	37740894	37740894	KANK4(dist=1705),TRNAC-ACA(dist=58228)	intergenic	114	INS.1165	-
1	37746743	37746743	KANK4(dist=7554),TRNAC-ACA(dist=52379)	intergenic	118	INS.1166	-
1	37746819	37746819	KANK4(dist=7630),TRNAC-ACA(dist=52303)	intergenic	119	INS.1167	-
1	37772181	37772319	KANK4(dist=32992),TRNAC-ACA(dist=26803)	intergenic	138	DEL.732	-
1	37777494	37777544	KANK4(dist=38305),TRNAC-ACA(dist=21578)	intergenic	50	DEL.733	-
1	37784449	37784449	KANK4(dist=45260),TRNAC-ACA(dist=14673)	intergenic	408	INS.1168	-
1	37798367	37798367	TRNAC-ACA	upstream	378	INS.1169	-
1	37798956	37799145	TRNAC-ACA	ncRNA_exonic	189	DEL.734	-
1	37800461	37800461	TRNAC-ACA(dist=1268),USP1(dist=64533)	intergenic	443	INS.1170	-
1	37830031	37830266	TRNAC-ACA(dist=30838),USP1(dist=34728)	intergenic	235	DEL.735	-
1	37850027	37850027	TRNAC-ACA(dist=50834),USP1(dist=14967)	intergenic	107	INS.1171	-
1	37872382	37873010	USP1	exonic	628	DEL.736	-
1	37874059	37875393	USP1	exonic	1334	DEL.737	-
1	37966701	37966701	DOCK7	intronic	4127	INS.1172	-
1	38050405	38050405	DOCK7	intronic	290	INS.1173	-
1	38089883	38089883	DOCK7(dist=22883),TRNAC-ACA(dist=15660)	intergenic	1624	INS.1174	-
1	38104731	38104731	TRNAC-ACA	downstream	81	INS.1175	-
1	38106997	38106997	TRNAC-ACA(dist=1382),ATG4C(dist=31656)	intergenic	111	INS.1176	-
1	38114704	38114704	TRNAC-ACA(dist=9089),ATG4C(dist=23949)	intergenic	87	INS.1177	-
1	38152138	38152138	ATG4C	intronic	1363	INS.1178	-
1	38164853	38165806	LOC114115222	exonic	953	DEL.738	-
1	38171133	38171133	ATG4C	intronic	77	INS.1179	-
1	38176227	38176227	ATG4C	intronic	681	INS.1180	-
1	38180852	38180852	ATG4C	intronic	1276	INS.1181	-
1	38183777	38184318	ATG4C	intronic	541	DEL.739	-
1	38184737	38186472	ATG4C	intronic	1735	DEL.740	-
1	38191078	38191338	ATG4C	intronic	260	DEL.741	-
1	38219463	38219463	ATG4C	intronic	138	INS.1182	-
1	38234328	38234396	ATG4C	intronic	68	DEL.742	-
1	38239711	38239836	ATG4C(dist=1221),TRNAY-GUA(dist=404334)	intergenic	125	DEL.743	-
1	38244488	38244488	ATG4C(dist=5998),TRNAY-GUA(dist=399682)	intergenic	185	INS.1183	-
1	38244497	38244497	ATG4C(dist=6007),TRNAY-GUA(dist=399673)	intergenic	303	INS.1184	-
1	38245245	38246288	ATG4C(dist=6755),TRNAY-GUA(dist=397882)	intergenic	1043	DEL.744	-
1	38263915	38263915	ATG4C(dist=25425),TRNAY-GUA(dist=380255)	intergenic	435	INS.1185	-
1	38311378	38311378	ATG4C(dist=72888),TRNAY-GUA(dist=332792)	intergenic	313	INS.1186	-
1	38333590	38333590	ATG4C(dist=95100),TRNAY-GUA(dist=310580)	intergenic	2519	INS.1187	-
1	38349537	38349832	ATG4C(dist=111047),TRNAY-GUA(dist=294338)	intergenic	295	DEL.745	-
1	38423665	38423665	ATG4C(dist=185175),TRNAY-GUA(dist=220505)	intergenic	510	INS.1188	-
1	38472732	38472732	ATG4C(dist=234242),TRNAY-GUA(dist=171438)	intergenic	637	INS.1189	-
1	38485634	38485634	ATG4C(dist=247144),TRNAY-GUA(dist=158536)	intergenic	1118	INS.1190	-
1	38489212	38489212	ATG4C(dist=250722),TRNAY-GUA(dist=154958)	intergenic	1306	INS.1191	-
1	38507630	38507630	ATG4C(dist=269140),TRNAY-GUA(dist=136540)	intergenic	107	INS.1192	-
1	38525259	38525614	ATG4C(dist=286769),TRNAY-GUA(dist=118556)	intergenic	355	DEL.746	-
1	38568519	38568519	ATG4C(dist=330029),TRNAY-GUA(dist=75651)	intergenic	216	INS.1193	-
1	38577599	38577599	ATG4C(dist=339109),TRNAY-GUA(dist=66571)	intergenic	328	INS.1194	-
1	38578152	38578152	ATG4C(dist=339662),TRNAY-GUA(dist=66018)	intergenic	2412	INS.1195	-
1	38600075	38601179	ATG4C(dist=361585),TRNAY-GUA(dist=42991)	intergenic	1104	DEL.747	-
1	38647793	38647793	TRNAY-GUA(dist=3552),FOXD3(dist=100261)	intergenic	4474	INS.1196	-
1	38673322	38673590	TRNAY-GUA(dist=29081),FOXD3(dist=74464)	intergenic	268	DEL.748	-
1	38703511	38704046	TRNAY-GUA(dist=59270),FOXD3(dist=44008)	intergenic	535	DEL.749	-
1	38870302	38870543	LOC101108702	intronic	241	DEL.750	-
1	38887401	38887401	LOC101108702	intronic	183	INS.1197	-
1	38914157	38915004	LOC121819493	exonic	847	DEL.751	-
1	38949011	38949137	EFCAB7	intronic	126	DEL.752	-
1	38992329	38992329	EFCAB7(dist=8572),PGM1(dist=9984)	intergenic	405	INS.1198	-
1	39008660	39009074	PGM1	intronic	414	DEL.753	-
1	39008662	39008662	PGM1	intronic	365	INS.1199	-
1	39012825	39013257	PGM1	intronic	432	DEL.754	-
1	39096055	39096055	PGM1(dist=25279),ROR1(dist=80189)	intergenic	630	INS.1200	-
1	39143296	39143744	PGM1(dist=72520),ROR1(dist=32500)	intergenic	448	DEL.755	-
1	39159317	39159999	PGM1(dist=88541),ROR1(dist=16245)	intergenic	682	DEL.756	-
1	39177364	39177364	ROR1	intronic	188	INS.1201	-
1	39265645	39265807	ROR1	intronic	162	DEL.757	-
1	39299778	39299778	ROR1	intronic	2580	INS.1202	-
1	39300248	39300248	ROR1	intronic	279	INS.1203	-
1	39395129	39396493	ROR1	intronic	1364	DEL.758	-
1	39438444	39438444	ROR1	intronic	88	INS.1204	-
1	39441334	39441334	ROR1	intronic	88	INS.1205	-
1	39674226	39674226	UBE2U	intronic	119	INS.1206	-
1	39681150	39681150	UBE2U	intronic	211	INS.1207	-
1	39681962	39681962	UBE2U	intronic	3418	INS.1208	-
1	39777558	39780309	UBE2U(dist=46693),CACHD1(dist=180345)	intergenic	2751	DEL.759	-
1	39813825	39813825	UBE2U(dist=82960),CACHD1(dist=146829)	intergenic	50	INS.1209	-
1	39833929	39833929	UBE2U(dist=103064),CACHD1(dist=126725)	intergenic	136	INS.1210	-
1	39845945	39845945	UBE2U(dist=115080),CACHD1(dist=114709)	intergenic	192	INS.1211	-
1	39860721	39861159	UBE2U(dist=129856),CACHD1(dist=99495)	intergenic	438	DEL.760	-
1	39869498	39869841	UBE2U(dist=138633),CACHD1(dist=90813)	intergenic	343	DEL.761	-
1	39871846	39871976	UBE2U(dist=140981),CACHD1(dist=88678)	intergenic	130	DEL.762	-
1	39893476	39893476	UBE2U(dist=162611),CACHD1(dist=67178)	intergenic	1834	INS.1212	-
1	40008110	40008110	CACHD1	intronic	69	INS.1213	-
1	40052624	40052680	CACHD1	intronic	56	DEL.763	-
1	40069808	40069808	CACHD1	intronic	118	INS.1214	-
1	40094264	40094264	CACHD1	intronic	83	INS.1215	-
1	40159279	40159332	CACHD1	intronic	53	DEL.764	-
1	40174827	40176742	CACHD1	intronic	1915	DEL.765	-
1	40193567	40193865	CACHD1	intronic	298	DEL.766	-
1	40225926	40227905	CACHD1(dist=25417),RAVER2(dist=33636)	intergenic	1979	DEL.767	-
1	40233036	40233036	CACHD1(dist=32527),RAVER2(dist=28505)	intergenic	50	INS.1216	-
1	40234448	40234448	CACHD1(dist=33939),RAVER2(dist=27093)	intergenic	900	INS.1217	-
1	40255272	40255347	CACHD1(dist=54763),RAVER2(dist=6194)	intergenic	75	DEL.768	-
1	40269410	40269410	RAVER2	intronic	101	INS.1218	-
1	40275980	40275980	RAVER2	intronic	447	INS.1219	-
1	40276111	40276111	RAVER2	intronic	623	INS.1220	-
1	40288105	40288105	RAVER2	intronic	444	INS.1221	-
1	40292743	40292743	RAVER2	intronic	193	INS.1222	-
1	40301360	40301414	RAVER2	intronic	54	DEL.769	-
1	40302894	40302894	RAVER2	intronic	75	INS.1223	-
1	40321264	40321264	RAVER2	intronic	310	INS.1224	-
1	40342787	40342787	RAVER2	intronic	81	INS.1225	-
1	40346268	40346268	RAVER2	intronic	608	INS.1226	-
1	40354066	40354203	RAVER2	intronic	137	DEL.770	-
1	40356360	40356360	RAVER2	intronic	143	INS.1227	-
1	40393441	40394715	LOC114115286	exonic	1274	DEL.771	-
[truncated: 147,160 more rows]

## Sheet: S6
Supplemental Table S6 Information of divergent variations.
Chromosome	Ref start	Ref end	Annotated genes	Feature	Predict genes	Path lengths	Path nodes	Path ID	Genes in non-reference path	Supported assemblies of paths
1	63054	63204	LOC114110836(dist=10184),FAM240C(dist=54713)	intergenic	NA	150|232	s10,s11,s12|s10,s323929,s12	b1_1_63054|b2_1_63054	-	Reference|KAZ12,QK11,QK12,WZM11,WZM12,YUN11,YUN12,KER11,KER12,DOR11,DOR12,FRI11,FRI12,MER12,ROM11,ROM12,SFK11,SFK12,TEX11,TEX12,CHA11,WDU12,RMV11,RMV12,WAG11,WAG12
1	415361	415477	FARP2	intronic	NA	116|188	s105,s106,s107|s105,s323917,s107	b1_1_415361|b2_1_415361	-	Reference,KAZ11,YUN11,MER11,ROM11,TEX11,TEX12,WAG11|KAZ12,QK11,QK12,WZM11,WZM12,YUN12,KER11,KER12,DOR11,DOR12,FRI11,FRI12,MER12,ROM11,SFK11,SFK12,CHA11,CHA12,WDU11,WDU12,RMV12,WAG12
1	946073	946334	KIF1A	intronic	NA	261|374	s372,s373,s374,s375,s376|s372,s373,s436702,s375,s376	b1_1_946073|b2_1_946073	-	Reference,QK11,YUN12,KER12,FRI11,FRI12,RMV11,RMV12,WAG12|KAZ12,WZM12,MER12,ROM12,SFK11,TEX11,CHA11,CHA12,WAG11
1	1290105	1291268	GPC1(dist=156037),OTOS(dist=35539)	intergenic	NA	1163|485	s444,s445,s446|s444,s350289,s446	b1_1_1290105|b2_1_1290105	-	Reference,KAZ11,KAZ12,KER11,KER12,DOR12,MER12,ROM12,SFK12,CHA11,CHA12,WDU11,WDU12,RMV11|QK12,WZM12,YUN11,YUN12,DOR11,FRI11,FRI12,ROM11,SFK11,TEX11,TEX12,RMV12,WAG11,WAG12
1	1299735	1301913	GPC1(dist=165667),OTOS(dist=24894)	intergenic	NA	2178|3564	s446,s447,s448|s446,s361019,s448	b1_1_1299735|b2_1_1299735	-	Reference,KAZ11,KAZ12,QK12,YUN11,KER11,KER12,DOR12,MER12,ROM12,TEX12,CHA11,CHA12,WDU11,WDU12,RMV11,RMV12,WAG12|WZM12,YUN12,DOR11,FRI11,FRI12,ROM11,SFK11,TEX11,WAG11
1	1365700	1369346	LOC101105206(dist=3455),LOC101105463(dist=5432)	intergenic	NA	3646|3594	s465,s466,s467|s465,s431223,s467	b1_1_1365700|b2_1_1365700	-	Reference,KAZ11,KAZ12,QK11,WZM12,YUN12,KER12,DOR11,DOR12,FRI11,FRI12,MER11,ROM11,SFK11,TEX12,CHA11,CHA12,WDU11,WDU12,RMV11,RMV12,WAG11,WAG12|QK12,WZM11,KER11,MER12,ROM12,SFK12,TEX11
1	1379584	1380147	LOC101105463(dist=3856),LOC101105712(dist=14570)	intergenic	NA	563|561	s467,s468,s469|s467,s441791,s469	b1_1_1379584|b2_1_1379584	-	Reference,KAZ11,KAZ12,DOR11,DOR12,FRI11,FRI12,MER12,ROM12,SFK12,TEX11,CHA11,CHA12,WDU11,RMV11|QK11,QK12,WZM11,WZM12,YUN11,YUN12,KER11,KER12,MER11,ROM11,SFK11,TEX12,WDU12,RMV12,WAG11,WAG12
1	1409290	1410795	LOC101105712(dist=13623),LOC101106226(dist=6159)	intergenic	NA	1505|109	s471,s472,s473|s471,s395628,s473	b1_1_1409290|b2_1_1409290	-	Reference,KAZ11,KAZ12,QK11,QK12,WZM11,WZM12,YUN11,YUN12,KER11,DOR11,DOR12,FRI11,FRI12,MER11,MER12,ROM12,SFK11,SFK12,TEX11,TEX12,CHA11,CHA12,WDU11,WDU12,RMV11,RMV12,WAG11,WAG12|KER12,ROM11
1	1411810	1412877	LOC101105712(dist=16143),LOC101106226(dist=4077)	intergenic	NA	1067|1017	s473,s474,s475|s473,s395627,s475	b1_1_1411810|b2_1_1411810	-	Reference,KAZ11,KAZ12,QK11,QK12,WZM11,WZM12,YUN11,YUN12,KER11,DOR11,DOR12,FRI11,FRI12,MER11,MER12,ROM12,SFK11,SFK12,TEX11,TEX12,CHA11,CHA12,WDU11,WDU12,RMV11,RMV12,WAG11,WAG12|KER12,ROM11
1	1564862	1565045	LOC101119802(dist=58553),LOC101106484(dist=4007)	intergenic	NA	183|122	s494,s495,s496|s494,s402920,s496	b1_1_1564862|b2_1_1564862	-	Reference,KAZ12,QK11,QK12,WZM11,WZM12,YUN11,YUN12,KER11,KER12,DOR11,MER11,MER12,ROM12,TEX12,CHA11,RMV11,WAG11,WAG12|DOR12,FRI11,FRI12,ROM11,SFK11,SFK12,TEX11,CHA12,WDU11,WDU12,RMV12
1	2156952	2157119	HDAC4	intronic	NA	167|226	s663,s664,s665,s666|s663,s664,s323831,s666	b1_1_2156952|b2_1_2156952	-	Reference,KAZ11,DOR12,SFK12,TEX11,CHA11,RMV12|QK12,WZM12,YUN12,KER12,DOR11,MER11,CHA12,WAG11,WAG12
1	2165783	2165926	HDAC4	intronic	NA	143|175	s666,s667,s668|s666,s340252,s668	b1_1_2165783|b2_1_2165783	-	Reference,KAZ11,KAZ12,QK12,WZM11,WZM12,YUN12,KER11,KER12,DOR11,DOR12,FRI11,FRI12,MER11,MER12,ROM11,ROM12,SFK11,SFK12,TEX11,CHA11,CHA12,WDU11,RMV11,RMV12,WAG11,WAG12|QK11,YUN11
1	2166028	2166293	HDAC4	intronic	NA	265|523	s670,s671,s672|s670,s340254,s672	b1_1_2166028|b2_1_2166028	-	Reference,KAZ11,KAZ12,QK12,WZM11,WZM12,YUN12,KER11,KER12,DOR11,DOR12,FRI11,FRI12,MER11,MER12,ROM11,ROM12,SFK11,SFK12,TEX11,CHA11,CHA12,WDU11,RMV11,RMV12,WAG11,WAG12|QK11,YUN11
1	2272433	2272600	HDAC4	intronic	NA	167|259	s706,s707,s708,s709|s706,s392406,s708,s709	b1_1_2272433|b2_1_2272433	-	Reference|KER11,KER12,MER12,ROM12,TEX11
1	2386080	2386224	HDAC4	intronic	NA	144|273	s789,s790,s791|s789,s293500,s791	b1_1_2386080|b2_1_2386080	-	Reference,KAZ12,QK12,WZM12,YUN11,YUN12,KER11,DOR11,DOR12,FRI11,FRI12,MER11,MER12,ROM12,SFK11,SFK12,TEX11,TEX12,CHA11,CHA12,WDU11,RMV11,WAG11,WAG12|KAZ11,QK11,WZM11,ROM11,RMV12
1	3756702	3756896	MLPH(dist=64646),COL6A3(dist=21026)	intergenic	NA	194|479	s1055,s1056,s1057|s1055,s325604,s1057	b1_1_3756702|b2_1_3756702	-	Reference,KAZ11,QK12,WZM11,WZM12,DOR12,MER11,MER12,ROM12,SFK12,TEX11,CHA11,CHA12,WDU11,WDU12,WAG11|KAZ12,QK11,YUN11,YUN12,KER11,KER12,DOR11,FRI11,FRI12,ROM11,SFK11,TEX12,RMV11,RMV12,WAG12
1	3825199	3825536	COL6A3	intronic	NA	337|340	s1058,s1059,s1060|s1058,s434138,s1060	b1_1_3825199|b2_1_3825199	-	Reference,KAZ11,KAZ12,QK11,QK12,WZM11,WZM12,YUN11,YUN12,KER11,KER12,DOR11,DOR12,FRI11,FRI12,MER11,MER12,ROM11,ROM12,SFK11,SFK12,TEX11,CHA11,CHA12,WDU11,WDU12,RMV11,RMV12,WAG11,WAG12|TEX12
1	4067235	4068337	TRNAC-ACA(dist=22378),COPS8(dist=29666)	intergenic	NA	1102|121	s1090,s1091,s1092|s1090,s419329,s1092	b1_1_4067235|b2_1_4067235	-	Reference,KAZ11,KAZ12,QK11,QK12,WZM11,WZM12,YUN11,YUN12,KER11,KER12,DOR11,FRI11,FRI12,MER11,MER12,ROM11,ROM12,SFK11,SFK12,TEX11,TEX12,CHA11,CHA12,WDU11,WDU12,RMV12,WAG11,WAG12|RMV11
1	4078453	4079548	TRNAC-ACA(dist=33596),COPS8(dist=18455)	intergenic	NA	1095|759	s1092,s1093,s1094|s1092,s420404,s1094	b1_1_4078453|b2_1_4078453	-	Reference,KAZ11,KAZ12,QK11,QK12,WZM11,WZM12,YUN11,YUN12,KER11,KER12,DOR11,FRI11,FRI12,MER11,MER12,ROM12,SFK11,SFK12,TEX11,TEX12,CHA11,CHA12,WDU11,WDU12,RMV11,WAG11,WAG12|ROM11,RMV12
1	4161447	4161561	COPS8(dist=50478),TRNAC-ACA(dist=180938)	intergenic	NA	114|114	s1104,s1105,s1106|s1104,s417309,s1106	b1_1_4161447|b2_1_4161447	-	Reference,KAZ11,KAZ12,QK11,QK12,WZM11,WZM12,YUN11,YUN12,KER11,KER12,DOR11,FRI11,FRI12,MER11,ROM11,ROM12,SFK11,SFK12,TEX11,TEX12,CHA11,CHA12,WDU11,WDU12,RMV11,RMV12,WAG11,WAG12|MER12
1	4907408	4908263	IQCA1(dist=32351),ASB18(dist=14020)	intergenic	NA	855|401	s1194,s1195,s1196|s1194,s293363,s1196	b1_1_4907408|b2_1_4907408	-	Reference,KAZ12,QK11,WZM11,WZM12,YUN11,YUN12,KER11,KER12,DOR11,MER12,ROM11,ROM12,SFK11,TEX11,CHA11,WDU11,WDU12,RMV11,RMV12,WAG11,WAG12|KAZ11,QK12,FRI11,FRI12,MER11,SFK12,CHA12
1	5325540	5325714	AGAP1	intronic	NA	174|175	s1256,s1257,s1258|s1256,s429766,s1258	b1_1_5325540|b2_1_5325540	-	Reference,KAZ11,KAZ12,QK11,QK12,WZM11,WZM12,YUN11,YUN12,KER11,KER12,DOR11,FRI11,FRI12,MER11,MER12,ROM11,ROM12,SFK12,TEX11,TEX12,CHA11,CHA12,WDU11,WDU12,RMV11,RMV12,WAG11,WAG12|SFK11
1	5849991	5850091	AGAP1(dist=217871),SH3BP4(dist=197179)	intergenic	NA	100|100	s1342,s1343,s1344|s1342,s429763,s1344	b1_1_5849991|b2_1_5849991	-	Reference,KAZ11,KAZ12,QK11,QK12,WZM11,WZM12,YUN11,YUN12,KER11,KER12,DOR11,FRI11,FRI12,MER11,MER12,ROM11,ROM12,SFK12,TEX11,TEX12,CHA11,CHA12,WDU11,RMV11,RMV12,WAG11,WAG12|SFK11
1	5876977	5877083	AGAP1(dist=244857),SH3BP4(dist=170187)	intergenic	NA	106|219	s1350,s1351,s1352|s1350,s293316,s1352	b1_1_5876977|b2_1_5876977	-	Reference,WZM11,FRI11,SFK12,CHA12|KAZ11,KAZ12,QK11,QK12,WZM12,YUN11,YUN12,KER11,KER12,DOR11,FRI12,MER11,MER12,ROM11,ROM12,SFK11,TEX11,TEX12,CHA11,WDU11,RMV11,RMV12,WAG11,WAG12
1	6162855	6163022	SH3BP4(dist=16754),ARL4C(dist=412507)	intergenic	NA	167|130	s1410,s1411,s1412|s1410,s293303,s1412	b1_1_6162855|b2_1_6162855	-	Reference,KAZ12,YUN11,YUN12,DOR11,FRI11,FRI12,MER12,SFK11,TEX12,CHA11,CHA12,WDU11,WDU12,RMV12,WAG11|KAZ11,QK11,QK12,WZM11,WZM12,KER11,KER12,ROM11,ROM12,SFK12,TEX11,RMV11,WAG12
1	6424694	6432875	SH3BP4(dist=278593),ARL4C(dist=142654)	intergenic	NA	8181|373	s1445,s1446,s1447|s1445,s326376,s1447	b1_1_6424694|b2_1_6424694	-	Reference,KAZ11,QK11,QK12,WZM11,WZM12,YUN11,YUN12,KER11,KER12,DOR11,FRI11,MER11,MER12,SFK12,TEX11,TEX12,CHA11,CHA12,WDU11,WDU12,RMV11,RMV12,WAG11,WAG12|KAZ12,FRI12,ROM11,ROM12,SFK11
1	6505463	6505618	SH3BP4(dist=359362),ARL4C(dist=69911)	intergenic	NA	155|109	s1455,s1456,s1457|s1455,s293298,s1457	b1_1_6505463|b2_1_6505463	-	Reference,KAZ12,QK11,WZM11,YUN11,YUN12,KER12,DOR11,FRI11,FRI12,MER11,MER12,ROM11,ROM12,SFK11,SFK12,TEX11,CHA11,WDU11,WDU12,RMV12,WAG11,WAG12|KAZ11,QK12,WZM12,KER11,TEX12,CHA12
1	7550006	7550112	DGKD	exonic	NA	106|106	s1539,s1540,s1541|s1539,s428755,s1541	b1_1_7550006|b2_1_7550006	-	Reference,KAZ11,KAZ12,QK11,QK12,WZM11,WZM12,YUN11,YUN12,KER11,KER12,DOR11,FRI11,FRI12,MER11,MER12,ROM11,ROM12,SFK12,TEX11,TEX12,CHA11,CHA12,WDU12,RMV11,RMV12,WAG11,WAG12|SFK11
1	8046405	8047388	NGEF	intronic	NA	983|333	s1574,s1575,s1576|s1574,s338633,s1576	b1_1_8046405|b2_1_8046405	-	Reference,KAZ11,KAZ12,YUN11,YUN12,KER11,KER12,DOR11,FRI11,FRI12,ROM11,ROM12,SFK11,SFK12,TEX11,TEX12,CHA11,CHA12,WDU12,RMV11,RMV12,WAG11,WAG12|QK11,QK12,WZM11,WZM12,MER11,MER12
1	8326091	8328392	EFHD1(dist=9976),ZSCAN20(dist=43710)	intergenic	NA	2301|4034	s1593,s1594,s1595|s1593,s293284,s1595	b1_1_8326091|b2_1_8326091	-	Reference,WZM11,WZM12,KER11,KER12,FRI11,ROM11,ROM12,SFK11,SFK12,TEX12|KAZ11,KAZ12,QK11,QK12,YUN11,YUN12,DOR11,FRI12,MER11,MER12,TEX11,CHA11,CHA12,WDU12,RMV11,RMV12,WAG11,WAG12
1	8895118	8895452	CSMD2	intronic	NA	334|335	s1652,s1653,s1654|s1652,s440146,s1654	b1_1_8895118|b2_1_8895118	-	Reference,KAZ11,KAZ12,QK11,QK12,WZM11,WZM12,YUN11,YUN12,KER11,KER12,DOR11,FRI11,FRI12,MER11,MER12,ROM11,ROM12,SFK11,SFK12,TEX11,CHA11,CHA12,WDU12,RMV11,RMV12,WAG11,WAG12|WDU11
1	9360403	9360544	C1H1orf94(dist=198538),GJB5(dist=435581)	intergenic	NA	141|194	s1695,s1696,s1697|s1695,s293266,s1697	b1_1_9360403|b2_1_9360403	-	Reference|KAZ11,KAZ12,QK11,QK12,WZM11,WZM12,YUN11,YUN12,KER11,KER12,DOR11,DOR12,FRI11,FRI12,MER11,MER12,ROM11,ROM12,SFK11,SFK12,TEX11,CHA12,WDU11,WDU12,RMV11,RMV12,WAG11,WAG12
1	9368284	9368627	C1H1orf94(dist=206419),GJB5(dist=427498)	intergenic	NA	343|104	s1697,s1698,s1699|s1697,s439984,s1699	b1_1_9368284|b2_1_9368284	-	Reference,KAZ11,KAZ12,QK11,QK12,WZM11,WZM12,YUN11,YUN12,KER11,KER12,DOR11,DOR12,FRI11,FRI12,MER11,MER12,ROM11,ROM12,SFK11,SFK12,TEX11,CHA12,WDU12,RMV11,RMV12,WAG11,WAG12|WDU11
1	9668209	9669511	C1H1orf94(dist=506344),GJB5(dist=126614)	intergenic	NA	1302|1021	s1718,s1719,s1720|s1718,s293262,s1720	b1_1_9668209|b2_1_9668209	-	Reference,KAZ12,WZM12,YUN11,YUN12,DOR11,DOR12,FRI11,FRI12,MER11,MER12,SFK11,SFK12,TEX11,WDU11,RMV12,WAG11|KAZ11,QK11,QK12,KER11,KER12,ROM11,ROM12,CHA11,CHA12,WDU12,RMV11,WAG12
1	11586877	11588622	CSF3R(dist=273038),GRIK3(dist=47391)	intergenic	NA	1745|241	s1822,s1823,s1824|s1822,s293238,s1824	b1_1_11586877|b2_1_11586877	-	Reference,QK11,QK12,YUN11,YUN12,KER11,KER12,DOR11,FRI11,FRI12,MER12,ROM12,TEX11,RMV11,RMV12,WAG11|KAZ11,KAZ12,WZM11,WZM12,MER11,ROM11,SFK11,SFK12,CHA11,CHA12,WDU11,WDU12,WAG12
1	11736365	11736629	GRIK3	intronic	NA	264|298	s1826,s1827,s1828|s1826,s419136,s1828	b1_1_11736365|b2_1_11736365	-	Reference,KAZ12,WZM12,YUN11,DOR11,FRI11,FRI12,MER11,MER12,ROM11,ROM12,SFK12,TEX11,CHA11,CHA12,WDU11,WDU12,RMV12|KAZ11,QK11,QK12,WZM11,YUN12,KER11,KER12,SFK11,RMV11,WAG11,WAG12
1	13055016	13056984	TRNAC-GCA(dist=10406),RRAGC(dist=519893)	intergenic	NA	1968|6952	s1887,s1888,s1889|s1887,s398674,s1889	b1_1_13055016|b2_1_13055016	-	Reference,KAZ11,KAZ12,QK11,QK12,WZM11,WZM12,YUN11,YUN12,KER11,KER12,DOR12,FRI11,FRI12,MER11,MER12,ROM11,ROM12,SFK11,SFK12,TEX11,CHA12,WDU12,RMV11,RMV12,WAG11,WAG12|DOR11
1	13624514	13624963	RHBDL2	intronic	NA	449|505	s1914,s1915,s1916|s1914,s301002,s1916	b1_1_13624514|b2_1_13624514	-	Reference,KAZ12,KER11,KER12,FRI11,FRI12,MER11,ROM11,ROM12,WDU12,RMV12|KAZ11,QK11,QK12,WZM11,WZM12,YUN11,YUN12,DOR11,DOR12,MER12,SFK11,SFK12,TEX11,CHA11,CHA12,WDU11,RMV11,WAG11,WAG12
1	14722626	14722879	PPT1(dist=30905),LOC105603393(dist=5583)	intergenic	NA	253|292	s1985,s1986,s1987|s1985,s301012,s1987	b1_1_14722626|b2_1_14722626	-	Reference,QK12,YUN12,KER11,KER12,DOR12,FRI11,FRI12,MER11,MER12,ROM11,ROM12,SFK11,SFK12,TEX11,CHA12,WDU11,RMV11,WAG11,WAG12|KAZ11,KAZ12,QK11,WZM11,WZM12,YUN11,DOR11,CHA11,WDU12,RMV12
1	14995685	14995826	SMAP2	intronic	NA	141|131	s2011,s2012,s2013|s2011,s432428,s2013	b1_1_14995685|b2_1_14995685	-	Reference,KAZ11,KAZ12,QK11,QK12,WZM11,WZM12,YUN12,KER11,KER12,DOR11,FRI11,FRI12,MER11,MER12,ROM11,ROM12,SFK11,SFK12,CHA12,WDU11,WDU12,RMV11,RMV12,WAG11,WAG12|YUN11,DOR12,SFK12,TEX11,CHA11
1	15471464	15471690	CITED4(dist=85652),CTPS1(dist=31309)	intergenic	NA	226|127	s2039,s2040,s2041|s2039,s424498,s2041	b1_1_15471464|b2_1_15471464	-	Reference,KAZ11,KAZ12,QK11,QK12,WZM11,WZM12,YUN11,YUN12,KER11,KER12,DOR11,DOR12,FRI11,FRI12,MER11,MER12,ROM12,SFK11,SFK12,TEX11,CHA11,CHA12,WDU12,RMV11,RMV12,WAG11,WAG12|ROM11
1	16491623	16492968	HIVEP3	intronic	NA	1345|287	s2114,s2115,s2116|s2114,s301025,s2116	b1_1_16491623|b2_1_16491623	-	Reference,QK12,YUN11,DOR12,ROM11,SFK11,TEX12,RMV12|KAZ11,KAZ12,QK11,WZM11,WZM12,YUN12,KER11,KER12,DOR11,FRI11,FRI12,MER11,MER12,ROM12,SFK12,TEX11,CHA11,CHA12,WDU11,WDU12,RMV11,WAG11,WAG12
1	16641368	16644444	HIVEP3(dist=47611),GUCA2B(dist=40869)	intergenic	NA	3076|1533	s2125,s2126,s2127|s2125,s389834,s2127	b1_1_16641368|b2_1_16641368	-	Reference,KAZ11,KAZ12,QK11,QK12,WZM11,WZM12,YUN11,YUN12,DOR11,FRI11,FRI12,MER11,MER12,ROM12,SFK11,SFK12,TEX11,CHA12,WDU11,WDU12,RMV11,RMV12,WAG11,WAG12|KER11,KER12,DOR12,ROM11,TEX12,CHA11
1	17642064	17643100	LOC101104115(dist=30732),LOC101104364(dist=2332)	intergenic	NA	1036|2596	s2207,s2208,s2209|s2207,s319795,s2209	b1_1_17642064|b2_1_17642064	-	Reference,KAZ11,QK11,QK12,WZM11,WZM12,YUN11,YUN12,KER11,KER12,DOR11,DOR12,FRI11,FRI12,MER11,MER12,ROM11,ROM12,SFK11,SFK12,TEX11,TEX12,CHA11,CHA12,WDU11,WDU12,RMV11,RMV12,WAG11,WAG12|KAZ12
1	17655792	17656354	LOC101104364(dist=9428),LOC101104625(dist=13326)	intergenic	NA	562|708	s2212,s2213,s2214|s2212,s351257,s2214	b1_1_17655792|b2_1_17655792	-	Reference,KAZ11,KAZ12,QK11,WZM12,YUN11,KER11,KER12,DOR11,DOR12,TEX12,WDU11,RMV11,RMV12,WAG11,WAG12|QK12,WZM11,YUN12,FRI11,FRI12,MER11,MER12,ROM11,ROM12,SFK11,SFK12,TEX11,CHA11,CHA12,WDU12
1	17709334	17710109	LOC101107645(dist=14602),LOC101107910(dist=6916)	intergenic	NA	775|826	s2218,s2219,s2220|s2218,s305349,s2220	b1_1_17709334|b2_1_17709334	-	Reference,QK12,WZM12,FRI12,SFK12,TEX11,TEX12,CHA12,WDU12,WAG12|KAZ11,KAZ12,QK11,WZM11,YUN11,YUN12,KER11,KER12,DOR11,DOR12,FRI11,MER11,MER12,ROM11,ROM12,SFK11,CHA11,WDU11,RMV11,RMV12,WAG11
1	17808578	17809299	LOC101105621(dist=2624),LOC101108434(dist=1041)	intergenic	NA	721|1801	s2231,s2232,s2233|s2231,s351260,s2233	b1_1_17808578|b2_1_17808578	-	Reference,KAZ11,KAZ12,QK11,WZM11,WZM12,YUN11,YUN12,KER11,KER12,DOR11,DOR12,FRI11,FRI12,MER11,MER12,ROM11,ROM12,SFK11,SFK12,TEX12,CHA11,CHA12,WDU11,WDU12,RMV11,RMV12,WAG11,WAG12|QK12
1	17899215	17899570	CFAP57	intronic	NA	355|631	s2236,s2237,s2238|s2236,s339025,s2238	b1_1_17899215|b2_1_17899215	-	Reference,WZM11,WZM12,YUN12,DOR11,FRI11,MER12,ROM12,SFK11,SFK12,TEX12,CHA12,WDU11,WDU12,RMV11,RMV12,WAG11,WAG12|KAZ12,QK11,QK12,YUN11,KER11,KER12,DOR12,FRI12,MER11,ROM11,CHA11
1	17968959	17970265	LOC101109657(dist=8405),TIE1(dist=11340)	intergenic	NA	1306|413	s2238,s2239,s2240|s2238,s303435,s2240	b1_1_17968959|b2_1_17968959	-	Reference,KAZ12,YUN11,YUN12,DOR11,MER12,SFK11,SFK12,TEX11,CHA11,CHA12,WDU11,WDU12,RMV12|KAZ11,QK11,QK12,WZM11,WZM12,KER11,KER12,DOR12,FRI11,FRI12,MER11,ROM11,ROM12,TEX12,RMV11,WAG11,WAG12
1	18780994	18783295	KLF17(dist=12188),DMAP1(dist=85189)	intergenic	NA	2301|230	s2290,s2291,s2292|s2290,s415022,s2292	b1_1_18780994|b2_1_18780994	-	Reference,KAZ11,KAZ12,QK11,QK12,WZM11,WZM12,YUN11,YUN12,KER11,KER12,DOR11,DOR12,FRI11,FRI12,MER11,ROM11,ROM12,SFK11,SFK12,TEX11,TEX12,CHA11,WDU11,WDU12,RMV11,RMV12,WAG11,WAG12|MER12,CHA12
1	19102551	19102738	RNF220	intronic	NA	187|210	s2304,s2305,s2306|s2304,s352248,s2306	b1_1_19102551|b2_1_19102551	-	Reference,KAZ11,KAZ12,QK11,QK12,YUN11,YUN12,KER11,KER12,DOR11,MER11,MER12,SFK12,TEX11,CHA11,CHA12,RMV11,RMV12,WAG12|WZM11,WZM12,DOR12,FRI11,FRI12,ROM11,ROM12,SFK11,TEX12,WDU11,WDU12,WAG11
1	19119426	19119985	RNF220	intronic	NA	559|1095	s2306,s2307,s2308|s2306,s371556,s2308	b1_1_19119426|b2_1_19119426	-	Reference,KAZ11,KAZ12,QK11,QK12,YUN11,KER11,KER12,DOR11,FRI11,FRI12,MER11,ROM11,SFK11,SFK12,TEX11,TEX12,CHA11,CHA12,WDU11,WDU12,RMV12,WAG11,WAG12|WZM11,WZM12,YUN12,DOR12,MER12,ROM12,RMV11
1	19759134	19759352	ZSWIM5	intronic	NA	218|178	s2325,s2326,s2327|s2325,s307757,s2327	b1_1_19759134|b2_1_19759134	-	Reference,KAZ11,QK11,WZM11,WZM12,YUN11,KER11,KER12,DOR11,FRI11,FRI12,ROM11,WDU12,WAG12|KAZ12,QK12,YUN12,DOR12,MER11,MER12,ROM12,SFK11,SFK12,TEX11,TEX12,CHA11,CHA12,WDU11,RMV11,RMV12,WAG11
1	20245553	20245722	GPBP1L1	intronic	NA	169|169	s2346,s2347,s2348|s2346,s420389,s2348	b1_1_20245553|b2_1_20245553	-	Reference,KAZ12,QK11,QK12,WZM11,WZM12,YUN11,YUN12,KER11,KER12,DOR11,DOR12,FRI11,FRI12,MER11,ROM11,ROM12,SFK11,SFK12,TEX11,TEX12,CHA11,CHA12,WDU11,WDU12,RMV11,WAG11,WAG12|RMV12
1	20839285	20839560	RAD54L	upstream	NA	275|216	s2368,s2369,s2370|s2368,s371561,s2370	b1_1_20839285|b2_1_20839285	-	Reference,KAZ11,KAZ12,QK11,QK12,WZM12,YUN11,YUN12,KER11,KER12,DOR11,DOR12,FRI11,FRI12,MER11,ROM11,ROM12,SFK11,SFK12,TEX11,CHA12,WDU11,WDU12,RMV11,RMV12,WAG11,WAG12|WZM11
1	22632063	22632293	TRABD2B(dist=124637),LOC101114922(dist=112118)	intergenic	NA	230|695	s2420,s2421,s2422|s2420,s307763,s2422	b1_1_22632063|b2_1_22632063	-	Reference,KAZ11,QK11,QK12,WZM11,WZM12,YUN12,KER11,KER12,DOR11,DOR12,FRI11,FRI12,MER11,MER12,ROM12,SFK11,SFK12,TEX11,TEX12,CHA11,CHA12,WDU12,RMV11,RMV12,WAG11,WAG12|KAZ12,YUN11,WDU11,WDU12
1	23814770	23820644	LOC114115358	intronic	NA	5874|4102	s2559,s2560,s2561|s2559,s300954,s2561	b1_1_23814770|b2_1_23814770	-	Reference,KAZ12,WZM12,DOR12,FRI11,FRI12,ROM12,SFK11,WDU11,WDU12,WAG11|KAZ11,QK11,QK12,WZM11,YUN11,YUN12,KER11,KER12,DOR11,MER11,MER12,ROM11,SFK12,TEX11,TEX12,CHA11,CHA12,WDU12,RMV11,RMV12,WAG12
1	24248651	24248876	LOC114115358	intronic	NA	225|8203	s2600,s2601,s2602|s2600,s350516,s2602	b1_1_24248651|b2_1_24248651	-	Reference,KAZ11,KAZ12,QK11,WZM11,YUN11,YUN12,DOR11,DOR12,FRI11,FRI12,MER11,MER12,ROM11,ROM12,SFK11,SFK12,TEX11,CHA11,CHA12,WDU11,WDU12,RMV11,WAG12|QK12,WZM12,KER11,KER12,RMV12,WAG11
1	25349422	25351336	FAF1	intronic	NA	1914|1306	s2652,s2653,s2654|s2652,s328626,s2654	b1_1_25349422|b2_1_25349422	-	Reference,KAZ11,KAZ12,QK12,WZM12,YUN11,YUN12,KER11,KER12,DOR11,DOR12,FRI11,FRI12,MER11,ROM12,SFK11,WDU11,RMV12,WAG12|QK11,WZM11,MER12,ROM11,SFK12,TEX11,TEX12,CHA11,CHA12,WDU12,RMV11,WAG11
1	26351659	26351786	NRDC(dist=30514),RAB3B(dist=6606)	intergenic	NA	127|127	s2679,s2680,s2681|s2679,s415417,s2681	b1_1_26351659|b2_1_26351659	-	Reference,KAZ11,KAZ12,QK11,QK12,WZM11,WZM12,YUN11,YUN12,KER11,KER12,DOR11,DOR12,FRI11,FRI12,MER11,ROM11,ROM12,SFK11,SFK12,TEX11,TEX12,CHA11,CHA12,WDU11,WDU12,RMV11,RMV12,WAG11,WAG12|MER12
1	27503619	27503828	LOC101117285	intronic	NA	209|128	s2740,s2741,s2742|s2740,s351519,s2742	b1_1_27503619|b2_1_27503619	-	Reference,KAZ11,KAZ12,QK11,WZM11,WZM12,YUN11,YUN12,KER11,KER12,DOR12,FRI11,FRI12,MER11,MER12,ROM11,ROM12,TEX11,TEX12,CHA11,CHA12,WDU11,WDU12,RMV11,RMV12,WAG11,WAG12|QK12,DOR11,SFK11,SFK12
1	29351110	29351532	DHCR24(dist=40212),TMEM61(dist=7175)	intergenic	NA	422|870	s2844,s2845,s2846|s2844,s406906,s2846	b1_1_29351110|b2_1_29351110	-	Reference,KAZ11,KAZ12,QK11,WZM11,WZM12,YUN11,YUN12,KER11,KER12,DOR11,DOR12,FRI12,MER11,MER12,ROM11,ROM12,SFK11,SFK12,TEX11,TEX12,CHA11,WDU11,WDU12,RMV11,RMV12,WAG11,WAG12|FRI11
1	30565112	30566305	TRNAY-AUA(dist=311252),TRNAW-CCA(dist=432404)	intergenic	NA	1193|789	s2946,s2947,s2948|s2946,s353493,s2948	b1_1_30565112|b2_1_30565112	-	Reference,KAZ11,KAZ12,QK11,QK12,WZM12,YUN11,YUN12,DOR11,DOR12,FRI12,MER11,MER12,ROM12,SFK12,TEX12,WDU11,WDU12,RMV11,RMV12|WZM11,KER11,KER12,FRI11,ROM11,SFK11,TEX11,CHA11,CHA12,WAG11,WAG12
1	31253415	31253802	PRKAA2	intronic	NA	387|2623	s2999,s3000,s3001|s2999,s426540,s3001	b1_1_31253415|b2_1_31253415	-	Reference,KAZ11,KAZ12,QK11,QK12,WZM11,WZM12,YUN11,YUN12,KER11,KER12,DOR11,DOR12,FRI11,FRI12,MER11,MER12,ROM11,SFK11,SFK12,TEX11,TEX12,CHA11,CHA12,WDU11,RMV11,RMV12,WAG11,WAG12|ROM12
1	32214328	32214433	DAB1(dist=136398),TRNAC-ACA(dist=265925)	intergenic	NA	105|1633	s3066,s3067,s3068|s3066,s422670,s3068	b1_1_32214328|b2_1_32214328	-	Reference,KAZ11,KAZ12,QK11,QK12,WZM11,WZM12,YUN11,YUN12,KER11,KER12,DOR11,DOR12,FRI11,FRI12,MER11,MER12,ROM11,ROM12,SFK11,SFK12,TEX11,TEX12,CHA11,CHA12,WDU11,WDU12,RMV11,WAG11,WAG12|RMV12
1	33105411	33105623	TRNAC-ACA(dist=624982),OMA1(dist=115527)	intergenic	NA	212|117	s3133,s3134,s3135|s3133,s289815,s3135	b1_1_33105411|b2_1_33105411	-	Reference,QK11,QK12,WZM11,WZM12,YUN11,YUN12,KER11,KER12,FRI12,MER11,MER12,ROM11,ROM12,SFK11,SFK12,TEX11,TEX12,CHA11,WDU11,WDU12,RMV11,WAG11,WAG12|KAZ11,KAZ12,DOR11,DOR12,FRI11,CHA12,RMV12
1	34012623	34012890	TRNAS-GGA(dist=329857),FGGY(dist=34045)	intergenic	NA	267|151	s3195,s3196,s3197|s3195,s298242,s3197	b1_1_34012623|b2_1_34012623	-	Reference|KAZ11,KAZ12,QK11,QK12,WZM11,WZM12,YUN11,KER11,KER12,DOR11,DOR12,FRI11,FRI12,MER11,MER12,ROM11,ROM12,SFK11,SFK12,TEX11,TEX12,CHA11,CHA12,WDU11,WDU12,RMV11,RMV12,WAG11,WAG12
1	34137044	34138556	FGGY	intronic	NA	1512|502	s3204,s3205,s3206|s3204,s411309,s3206	b1_1_34137044|b2_1_34137044	-	Reference,KAZ11,KAZ12,QK11,QK12,WZM11,WZM12,YUN11,YUN12,KER11,KER12,DOR11,DOR12,FRI11,FRI12,ROM11,ROM12,SFK12,CHA11,CHA12,WDU11,WDU12,RMV11,RMV12,WAG11,WAG12|MER11,MER12,SFK11,TEX11,TEX12
1	34272438	34272567	FGGY	intronic	NA	129|129	s3230,s3231,s3232|s3230,s425093,s3232	b1_1_34272438|b2_1_34272438	-	Reference,KAZ11,KAZ12,QK11,QK12,WZM11,WZM12,YUN11,YUN12,KER11,KER12,DOR11,DOR12,FRI11,FRI12,MER11,MER12,ROM12,SFK11,SFK12,TEX11,TEX12,CHA11,CHA12,WDU11,WDU12,RMV11,RMV12,WAG11,WAG12|ROM11
1	34836538	34836796	LOC101121563	intronic	NA	258|206	s3261,s3262,s3263|s3261,s298217,s3263	b1_1_34836538|b2_1_34836538	-	Reference,QK12,WZM11,WZM12,YUN11,KER11,KER12,DOR12,FRI11,FRI12,MER11,ROM11,SFK11,SFK12,TEX11,TEX12,CHA11,CHA12,WDU11,WDU12,RMV12,WAG12|KAZ11,KAZ12,QK11,YUN12,DOR11,MER12,ROM12,RMV11,WAG11
1	34883703	34883819	LOC101121820(dist=3448),CYP2J(dist=84740)	intergenic	NA	116|153	s3269,s3270,s3271|s3269,s298213,s3271	b1_1_34883703|b2_1_34883703	-	Reference,YUN11,YUN12,KER11,KER12,CHA12,RMV12|KAZ11,KAZ12,QK11,QK12,WZM11,WZM12,DOR11,DOR12,FRI11,FRI12,MER11,MER12,ROM11,ROM12,SFK11,SFK12,TEX11,TEX12,CHA11,WDU11,WDU12,RMV11,WAG11,WAG12
1	35234862	35237585	C1H1orf87(dist=58933),TRNAS-GGA(dist=291585)	intergenic	NA	2723|483	s3305,s3306,s3307|s3305,s298208,s3307	b1_1_35234862|b2_1_35234862	-	Reference,KAZ12,QK11,QK12,WZM11,YUN11,YUN12,KER11,DOR11,DOR12,FRI11,FRI12,MER11,MER12,ROM11,SFK11,TEX11,TEX12,CHA12,WDU11,RMV11,RMV12,WAG11,WAG12|KAZ11,WZM12,KER12,ROM12,SFK12,CHA11,WDU12
1	35563850	35567076	TRNAS-GGA(dist=34609),NFIA(dist=751332)	intergenic	NA	3226|478	s3337,s3338,s3339|s3337,s298206,s3339	b1_1_35563850|b2_1_35563850	-	Reference,KAZ12,QK11,QK12,WZM11,WZM12,YUN11,YUN12,KER12,DOR12,FRI11,FRI12,MER12,ROM11,ROM12,SFK11,SFK12,TEX11,TEX12,CHA11,CHA12,WDU11,WDU12,RMV12,WAG11,WAG12|KAZ11,KER11,DOR11,MER11,RMV11
1	35626517	35626768	TRNAS-GGA(dist=97276),NFIA(dist=691640)	intergenic	NA	251|163	s3343,s3344,s3345|s3343,s298205,s3345	b1_1_35626517|b2_1_35626517	-	Reference|KAZ11,KAZ12,QK11,QK12,WZM11,WZM12,YUN11,YUN12,KER11,KER12,DOR11,DOR12,FRI11,FRI12,MER11,MER12,ROM11,ROM12,SFK11,SFK12,TEX11,TEX12,CHA11,CHA12,WDU11,WDU12,RMV11,RMV12,WAG11,WAG12
1	35976137	35976417	TRNAS-GGA(dist=446896),NFIA(dist=341991)	intergenic	NA	280|8059	s3390,s3391,s3392|s3390,s424484,s3392	b1_1_35976137|b2_1_35976137	-	Reference,KAZ11,KAZ12,QK11,QK12,WZM11,WZM12,YUN11,YUN12,KER11,KER12,DOR11,DOR12,FRI11,FRI12,MER11,MER12,ROM12,SFK11,SFK12,TEX12,CHA11,WDU11,RMV11,RMV12,WAG11,WAG12|ROM11,TEX11,CHA12,WDU12
1	37435905	37437331	LOC121819447(dist=1291),LOC121819452(dist=88720)	intergenic	NA	1426|276	s3478,s3479,s3480|s3478,s353515,s3480	b1_1_37435905|b2_1_37435905	-	Reference,KAZ11,KAZ12,QK11,QK12,WZM11,WZM12,YUN11,YUN12,KER11,KER12,DOR11,DOR12,FRI11,FRI12,MER11,MER12,ROM11,ROM12,SFK11,SFK12,TEX11,TEX12,CHA11,CHA12,WDU11,WDU12,RMV11,RMV12,WAG12|WAG11
1	37522365	37522683	LOC121819447(dist=87751),LOC121819452(dist=3368)	intergenic	NA	318|232	s3484,s3485,s3486|s3484,s298188,s3486	b1_1_37522365|b2_1_37522365	-	Reference|KAZ11,KAZ12,QK11,QK12,WZM11,WZM12,YUN11,YUN12,KER11,KER12,DOR11,DOR12,FRI11,FRI12,MER11,MER12,ROM11,ROM12,SFK11,SFK12,TEX11,TEX12,CHA11,CHA12,WDU11,WDU12,RMV11,RMV12,WAG11,WAG12
1	37614222	37614393	LOC121819452(dist=78736),KANK4(dist=51205)	intergenic	NA	171|836	s3492,s3493,s3494|s3492,s353516,s3494	b1_1_37614222|b2_1_37614222	-	Reference,KAZ11,KAZ12,QK11,QK12,WZM11,WZM12,KER11,KER12,DOR11,DOR12,FRI11,FRI12,MER11,MER12,ROM11,ROM12,SFK11,SFK12,TEX11,TEX12,CHA11,CHA12,WDU11,RMV11,RMV12|YUN11,YUN12,WDU12,WAG11,WAG12
1	37615551	37616142	LOC121819452(dist=80065),KANK4(dist=49456)	intergenic	NA	591|514	s3494,s3495,s3496|s3494,s353517,s3496	b1_1_37615551|b2_1_37615551	-	Reference,KAZ11,KAZ12,QK11,QK12,WZM11,WZM12,KER11,KER12,DOR11,DOR12,FRI11,FRI12,MER11,MER12,ROM11,ROM12,SFK11,SFK12,TEX11,TEX12,CHA11,CHA12,WDU11,RMV11,RMV12|YUN11,YUN12,WDU12,WAG11,WAG12
1	38161778	38161932	ATG4C	intronic	NA	154|154	s3523,s3524,s3525|s3523,s441341,s3525	b1_1_38161778|b2_1_38161778	-	Reference,KAZ11,KAZ12,QK11,QK12,WZM11,WZM12,YUN11,YUN12,KER11,KER12,DOR11,DOR12,FRI11,FRI12,MER11,MER12,ROM11,ROM12,SFK11,SFK12,TEX11,TEX12,CHA11,CHA12,WDU11,RMV11,RMV12,WAG11,WAG12|WDU12
1	38184473	38187118	ATG4C	intronic	NA	2645|918	s3536,s3537,s3538|s3536,s389851,s3538	b1_1_38184473|b2_1_38184473	-	Reference,KAZ11,KAZ12,QK11,QK12,WZM11,WZM12,YUN11,YUN12,KER12,DOR11,DOR12,FRI11,FRI12,MER11,MER12,ROM11,ROM12,SFK11,SFK12,TEX11,TEX12,CHA11,CHA12,RMV11,WAG11,WAG12|KER11,WDU11,WDU12,RMV12
1	38686062	38686199	TRNAY-GUA(dist=41821),FOXD3(dist=61855)	intergenic	NA	137|157	s3575,s3576,s3577|s3575,s271655,s3577	b1_1_38686062|b2_1_38686062	-	Reference,YUN11,CHA11|KAZ11,KAZ12,QK11,WZM11,WZM12,YUN12,KER11,KER12,DOR11,DOR12,FRI11,FRI12,MER11,MER12,ROM11,ROM12,SFK11,SFK12,TEX11,TEX12,CHA12,WDU11,WDU12,RMV11,RMV12,WAG11,WAG12
1	40823314	40824533	AK4	intronic	NA	1219|209	s3688,s3689,s3690|s3688,s432587,s3690	b1_1_40823314|b2_1_40823314	-	Reference,KAZ11,KAZ12,QK11,QK12,WZM11,WZM12,YUN11,YUN12,KER11,KER12,DOR11,DOR12,FRI11,FRI12,MER11,MER12,ROM11,ROM12,SFK11,SFK12,TEX12,CHA11,CHA12,WDU11,WDU12,RMV11,RMV12,WAG11,WAG12|TEX11
1	41186885	41187154	LEPR	intronic	NA	269|127	s3717,s3718,s3719|s3717,s271672,s3719	b1_1_41186885|b2_1_41186885	-	Reference,KAZ12,QK11,QK12,WZM11,YUN11,YUN12,KER11,KER12,DOR11,DOR12,FRI11,FRI12,MER11,MER12,ROM12,SFK11,SFK12,TEX11,TEX12,WDU11,RMV11,RMV12|KAZ11,WZM12,ROM11,CHA11,CHA12,WDU12,WAG11,WAG12
1	41282204	41282373	LEPR(dist=32436),PDE4B(dist=96235)	intergenic	NA	169|225	s3729,s3730,s3731|s3729,s271675,s3731	b1_1_41282204|b2_1_41282204	-	Reference|KAZ11,KAZ12,QK11,QK12,WZM11,WZM12,YUN11,YUN12,KER11,KER12,DOR11,DOR12,FRI11,FRI12,MER11,MER12,ROM11,ROM12,SFK11,SFK12,TEX11,TEX12,CHA11,CHA12,WDU11,WDU12,RMV11,RMV12,WAG11,WAG12
1	41285501	41285643	LEPR(dist=35733),PDE4B(dist=92965)	intergenic	NA	142|169	s3737,s3738,s3739|s3737,s271680,s3739	b1_1_41285501|b2_1_41285501	-	Reference|KAZ11,KAZ12,QK11,QK12,WZM11,WZM12,YUN11,YUN12,KER11,KER12,DOR11,DOR12,FRI11,FRI12,MER11,MER12,ROM11,ROM12,SFK11,SFK12,TEX11,TEX12,CHA11,CHA12,WDU11,WDU12,RMV11,RMV12,WAG11,WAG12
1	42657384	42657594	MIER1	intronic	NA	210|1122	s3837,s3838,s3839|s3837,s271700,s3839	b1_1_42657384|b2_1_42657384	-	Reference|KAZ11,KAZ12,QK11,QK12,WZM11,WZM12,YUN11,YUN12,KER11,KER12,DOR11,DOR12,FRI11,FRI12,MER11,MER12,ROM11,ROM12,SFK11,SFK12,TEX11,TEX12,CHA11,CHA12,WDU11,WDU12,RMV11,RMV12,WAG11,WAG12
1	43750866	43753322	DIRAS3(dist=26991),WLS(dist=27738)	intergenic	NA	2456|5606	s3906,s3907,s3908|s3906,s307887,s3908	b1_1_43750866|b2_1_43750866	-	Reference,KAZ11,QK11,QK12,WZM11,WZM12,YUN12,KER11,DOR12,FRI11,FRI12,MER11,MER12,ROM11,ROM12,SFK11,SFK12,TEX11,TEX12,CHA11,CHA12,WDU11,WDU12,RMV11,RMV12|KAZ12,YUN11,KER12,DOR11,WAG11,WAG12
1	43908817	43909502	WLS(dist=11595),TRNAC-ACA(dist=161853)	intergenic	NA	685|555	s3917,s3918,s3919|s3917,s387148,s3919	b1_1_43908817|b2_1_43908817	-	Reference,KAZ11,KAZ12,QK11,QK12,WZM11,WZM12,YUN11,KER11,DOR11,DOR12,FRI11,FRI12,MER11,MER12,ROM11,ROM12,SFK11,SFK12,TEX11,TEX12,CHA11,CHA12,WDU11,WDU12,RMV11,RMV12,WAG11,WAG12|YUN12,KER12
1	44848819	44850710	DEPDC1(dist=650917),LRRC7(dist=482293)	intergenic	NA	1891|207	s4021,s4022,s4023|s4021,s307897,s4023	b1_1_44848819|b2_1_44848819	-	Reference,KAZ11,WZM11,KER11,DOR11,DOR12,ROM11,ROM12,SFK11,SFK12,TEX11,TEX12,CHA11,CHA12,WDU11,WDU12,RMV12,WAG11,WAG12|KAZ12,QK11,QK12,WZM12,YUN11,YUN12,KER12,FRI11,FRI12,MER11,MER12,RMV11
1	44882942	44887435	DEPDC1(dist=685040),LRRC7(dist=445568)	intergenic	NA	4493|2494	s4032,s4033,s4034|s4032,s350164,s4034	b1_1_44882942|b2_1_44882942	-	Reference,KAZ11,KAZ12,QK11,WZM11,WZM12,YUN11,YUN12,KER11,KER12,DOR11,DOR12,FRI11,FRI12,MER11,MER12,ROM11,ROM12,SFK11,SFK12,TEX11,TEX12,CHA11,CHA12,WDU11,WDU12,RMV11,RMV12,WAG11,WAG12|QK12
1	44978534	44978637	DEPDC1(dist=780632),LRRC7(dist=354366)	intergenic	NA	103|291	s4050,s4051,s4052|s4050,s366589,s4052	b1_1_44978534|b2_1_44978534	-	Reference,KAZ11,KAZ12,QK11,QK12,WZM11,WZM12,YUN11,YUN12,KER11,KER12,DOR11,DOR12,FRI11,FRI12,MER11,MER12,ROM11,ROM12,SFK11,SFK12,TEX11,TEX12,CHA11,CHA12,WDU11,WDU12,RMV11,RMV12,WAG11|WAG12
1	45244617	45246309	DEPDC1(dist=1046715),LRRC7(dist=86694)	intergenic	NA	1692|3905	s4101,s4102,s4103|s4101,s420011,s4103	b1_1_45244617|b2_1_45244617	-	Reference,KAZ11,KAZ12,QK11,QK12,WZM11,WZM12,YUN11,YUN12,KER11,KER12,DOR11,DOR12,FRI11,FRI12,MER11,MER12,ROM11,ROM12,SFK11,SFK12,TEX11,TEX12,CHA11,CHA12,WDU11,WDU12,RMV12,WAG11,WAG12|RMV11
1	45538899	45540353	LRRC7	intronic	NA	1454|2339	s4129,s4130,s4131|s4129,s271737,s4131	b1_1_45538899|b2_1_45538899	-	Reference|KAZ11,KAZ12,QK11,QK12,WZM11,WZM12,YUN11,YUN12,KER11,KER12,DOR11,DOR12,FRI11,FRI12,MER11,MER12,ROM11,ROM12,SFK11,SFK12,TEX11,TEX12,CHA11,CHA12,WDU11,WDU12,RMV11,RMV12,WAG11,WAG12
1	45820700	45820815	LRRC7	intronic	NA	115|515	s4175,s4176,s4177|s4175,s347320,s4177	b1_1_45820700|b2_1_45820700	-	Reference,KAZ11,KAZ12,QK11,WZM11,WZM12,YUN11,YUN12,KER11,KER12,DOR11,DOR12,FRI11,FRI12,MER11,MER12,ROM11,ROM12,SFK11,SFK12,TEX11,TEX12,CHA12,WDU11,WDU12,RMV11,RMV12,WAG11|QK12,CHA11
1	46373893	46374065	CTH(dist=155734),PTGER3(dist=191368)	intergenic	NA	172|222	s4209,s4210,s4211|s4209,s368972,s4211	b1_1_46373893|b2_1_46373893	-	Reference,KAZ12,QK11,QK12,WZM12,YUN11,YUN12,KER11,KER12,DOR11,FRI11,FRI12,MER12,ROM12,SFK12,WDU11,WDU12,RMV11,RMV12,WAG11,WAG12|KAZ11,WZM11,DOR12,MER11,ROM11,SFK11,TEX11,TEX12,CHA11,CHA12,WDU11
1	46443928	46448410	CTH(dist=225769),PTGER3(dist=117023)	intergenic	NA	4482|1583	s4222,s4223,s4224|s4222,s271756,s4224	b1_1_46443928|b2_1_46443928	-	Reference,KAZ12,QK11,WZM11,WZM12,YUN11,KER11,KER12,DOR11,DOR12,MER11,ROM12,TEX12,CHA11,CHA12,WDU11,RMV11,WAG12|KAZ11,QK12,YUN12,FRI11,FRI12,MER12,ROM11,SFK11,SFK12,TEX11,WDU11,WDU12,RMV12,WAG11
1	47250362	47250467	NEGR1	intronic	NA	105|1554	s4307,s4308,s4309|s4307,s307913,s4309	b1_1_47250362|b2_1_47250362	-	Reference,KAZ11,QK11,QK12,WZM11,KER12,DOR11,DOR12,FRI11,FRI12,MER11,ROM11,SFK11,SFK12,TEX11,WDU11,RMV12|KAZ12,WZM12,YUN11,YUN12,KER11,MER12,ROM12,TEX12,CHA11,CHA12,RMV11,WAG11,WAG12
1	47837297	47838563	NEGR1	intronic	NA	1266|156	s4373,s4374,s4375|s4373,s368978,s4375	b1_1_47837297|b2_1_47837297	-	Reference,KAZ11,KAZ12,QK11,QK12,WZM12,YUN11,KER11,KER12,DOR11,DOR12,MER11,MER12,ROM12,SFK11,SFK12,TEX12,CHA11,CHA12,WDU11,WAG11,WAG12|WZM11,YUN12,FRI11,FRI12,ROM11,TEX11,WDU12,RMV11,RMV12
1	47880183	47880324	NEGR1	intronic	NA	141|1253	s4376,s4377,s4378|s4376,s353548,s4378	b1_1_47880183|b2_1_47880183	-	Reference,KAZ11,KAZ12,QK11,QK12,WZM11,WZM12,YUN11,YUN12,KER11,KER12,FRI11,FRI12,MER11,MER12,ROM11,ROM12,SFK11,TEX11,CHA11,CHA12,RMV11,RMV12,WAG12|DOR11,DOR12,SFK12,TEX12,WDU11,WDU12,WAG11
1	48194546	48194915	NEGR1(dist=29455),LRRIQ3(dist=1991651)	intergenic	NA	369|245	s4412,s4413,s4414|s4412,s271787,s4414	b1_1_48194546|b2_1_48194546	-	Reference,KAZ12,QK11,QK12,WZM11,WZM12,YUN11,YUN12,KER11,KER12,DOR11,DOR12,FRI11,FRI12,MER11,MER12,ROM11,ROM12,SFK11,SFK12,TEX11,TEX12,CHA11,CHA12,WDU11,WDU12,RMV11,RMV12,WAG11,WAG12|KAZ11
1	48502245	48503625	NEGR1(dist=337154),LRRIQ3(dist=1682941)	intergenic	NA	1380|163	s4460,s4461,s4462|s4460,s347308,s4462	b1_1_48502245|b2_1_48502245	-	Reference,KAZ11,KAZ12,QK11,WZM11,WZM12,YUN11,YUN12,KER11,KER12,DOR12,FRI11,FRI12,MER11,MER12,ROM11,ROM12,SFK12,TEX11,TEX12,CHA11,WDU11,RMV11,RMV12|QK12,DOR11,SFK11,CHA12,WDU11,WAG11,WAG12
1	48640807	48640949	NEGR1(dist=475716),LRRIQ3(dist=1545617)	intergenic	NA	142|153	s4486,s4487,s4488|s4486,s415973,s4488	b1_1_48640807|b2_1_48640807	-	Reference,KAZ11,KAZ12,QK11,QK12,WZM11,WZM12,YUN11,YUN12,KER11,KER12,DOR11,DOR12,FRI11,FRI12,MER11,ROM11,ROM12,SFK11,SFK12,TEX11,TEX12,CHA11,CHA12,WDU11,WDU12,RMV11,RMV12,WAG11,WAG12|MER12
1	48701288	48702090	NEGR1(dist=536197),LRRIQ3(dist=1484476)	intergenic	NA	802|3755	s4496,s4497,s4498|s4496,s353550,s4498	b1_1_48701288|b2_1_48701288	-	Reference,KAZ11,KAZ12,QK11,QK12,WZM12,YUN12,KER11,DOR11,DOR12,FRI11,FRI12,MER11,MER12,ROM12,SFK11,SFK12,TEX11,TEX12,CHA11,CHA12,WDU11,WDU12,RMV11,RMV12,WAG12|WZM11,YUN11,KER12,ROM11,WAG11
1	48712332	48712468	NEGR1(dist=547241),LRRIQ3(dist=1474098)	intergenic	NA	136|175	s4498,s4499,s4500|s4498,s271801,s4500	b1_1_48712332|b2_1_48712332	-	Reference,WZM11,WZM12,YUN11,YUN12,KER11,KER12,DOR11,DOR12,FRI11,FRI12,MER12,ROM11,ROM12,SFK12,CHA11,WDU11,WAG11,WAG12|KAZ11,KAZ12,QK11,QK12,MER11,SFK11,TEX11,TEX12,CHA12,WDU12,RMV11,RMV12
1	48797000	48797157	NEGR1(dist=631909),LRRIQ3(dist=1389409)	intergenic	NA	157|221	s4517,s4518,s4519|s4517,s271806,s4519	b1_1_48797000|b2_1_48797000	-	Reference|KAZ11,KAZ12,QK11,QK12,WZM11,WZM12,YUN11,YUN12,KER11,KER12,DOR11,DOR12,FRI11,FRI12,MER11,MER12,ROM11,ROM12,SFK11,SFK12,TEX11,TEX12,CHA11,CHA12,WDU11,WDU12,RMV11,RMV12,WAG11,WAG12
1	48799284	48799924	NEGR1(dist=634193),LRRIQ3(dist=1386642)	intergenic	NA	640|919	s4523,s4524,s4525|s4523,s271808,s4525	b1_1_48799284|b2_1_48799284	-	Reference|KAZ11,KAZ12,QK11,QK12,WZM11,WZM12,YUN11,YUN12,KER11,KER12,DOR11,DOR12,FRI11,FRI12,MER11,MER12,ROM11,ROM12,SFK11,SFK12,TEX11,TEX12,CHA11,CHA12,WDU11,WDU12,RMV11,RMV12,WAG11,WAG12
1	48982214	48983969	NEGR1(dist=817123),LRRIQ3(dist=1202597)	intergenic	NA	1755|2147	s4544,s4545,s4546|s4544,s307934,s4546	b1_1_48982214|b2_1_48982214	-	Reference,KAZ11,QK11,QK12,WZM12,YUN11,KER11,KER12,MER12,TEX12,CHA11,WAG12|KAZ12,WZM11,YUN12,DOR11,DOR12,FRI11,FRI12,MER11,ROM12,SFK11,SFK12,TEX11,CHA12,WDU11,WDU12,RMV11,RMV12,WAG11
1	49165167	49166852	NEGR1(dist=1000076),LRRIQ3(dist=1019714)	intergenic	NA	1685|7487	s4567,s4568,s4569|s4567,s353552,s4569	b1_1_49165167|b2_1_49165167	-	Reference,KAZ11,KAZ12,QK11,QK12,WZM11,WZM12,YUN11,YUN12,KER12,DOR11,DOR12,FRI11,FRI12,MER11,MER12,ROM11,ROM12,SFK11,SFK12,TEX11,TEX12,CHA11,CHA12,WDU11,WDU12,RMV11,RMV12,WAG12|KER11,WAG11
1	49335141	49335640	NEGR1(dist=1170050),LRRIQ3(dist=850926)	intergenic	NA	499|1455	s4593,s4594,s4595|s4593,s271823,s4595	b1_1_49335141|b2_1_49335141	-	Reference,QK11,WZM12,DOR11,MER12,TEX12,WDU12|KAZ11,KAZ12,QK12,WZM11,YUN11,YUN12,KER11,KER12,DOR12,FRI11,FRI12,MER11,MER12,ROM11,ROM12,SFK11,SFK12,TEX11,CHA11,CHA12,WDU11,RMV11,RMV12,WAG11,WAG12
1	50118119	50118582	NEGR1(dist=1953028),LRRIQ3(dist=67984)	intergenic	NA	463|970	s4699,s4700,s4701|s4699,s307944,s4701	b1_1_50118119|b2_1_50118119	-	Reference,KAZ11,QK11,WZM11,YUN11,KER12,DOR11,DOR12,FRI11,FRI12,MER11,MER12,ROM12,SFK11,SFK12,TEX11,TEX12,CHA12,WDU11,WDU12,RMV11,RMV12,WAG11|KAZ12,QK12,WZM12,YUN12,KER11,ROM11,CHA11,WAG12
1	50458506	50458658	LOC101120030	intronic	NA	152|130	s4718,s4719,s4720|s4718,s364991,s4720	b1_1_50458506|b2_1_50458506	-	Reference,KAZ11,KAZ12,QK11,QK12,WZM11,WZM12,YUN11,YUN12,KER11,KER12,DOR11,DOR12,FRI11,FRI12,MER11,MER12,ROM11,ROM12,SFK11,SFK12,TEX11,TEX12,CHA11,CHA12,WDU11,WDU12,RMV11,RMV12,WAG11|WAG12
1	51891231	51891700	TRNAC-GCA(dist=111351),ACADM(dist=20164)	intergenic	NA	469|108	s4819,s4820,s4821|s4819,s283335,s4821	b1_1_51891231|b2_1_51891231	-	Reference,WZM12,FRI11,MER12,ROM11,ROM12,WDU11,WDU12,RMV12,WAG12|KAZ11,KAZ12,QK11,QK12,WZM11,WZM12,YUN11,YUN12,KER11,KER12,DOR11,DOR12,FRI12,MER11,SFK11,SFK12,TEX11,TEX12,CHA11,CHA12,RMV11,WAG11
1	52643519	52643625	ST6GALNAC3	intronic	NA	106|118	s4863,s4864,s4865|s4863,s437004,s4865	b1_1_52643519|b2_1_52643519	-	Reference,KAZ11,KAZ12,QK11,QK12,WZM11,WZM12,YUN11,YUN12,KER11,KER12,DOR11,DOR12,FRI11,FRI12,MER11,MER12,ROM11,ROM12,SFK11,SFK12,TEX11,TEX12,CHA12,WDU11,WDU12,RMV11,RMV12,WAG11,WAG12|CHA11
1	52815269	52815432	ST6GALNAC3	intronic	NA	163|154	s4884,s4885,s4886|s4884,s328741,s4886	b1_1_52815269|b2_1_52815269	-	Reference,KAZ11,KAZ12,WZM12,KER12,MER12,TEX11,RMV12,WAG11|QK11,QK12,WZM11,YUN11,YUN12,KER11,DOR11,DOR12,FRI11,FRI12,MER11,ROM11,ROM12,SFK11,SFK12,TEX12,CHA11,CHA12,WDU11,WDU12,RMV11,WAG12
1	53120268	53120561	ST6GALNAC3(dist=125235),ST6GALNAC5(dist=147848)	intergenic	NA	293|293	s4919,s4920,s4921|s4919,s328743,s4921	b1_1_53120268|b2_1_53120268	-	Reference,KAZ11,KAZ12,QK12,WZM11,WZM12,YUN11,YUN12,KER11,KER12,DOR11,DOR12,FRI11,FRI12,MER11,MER12,ROM11,ROM12,SFK11,SFK12,TEX11,TEX12,CHA11,CHA12,WDU11,WDU12,RMV11,RMV12,WAG11,WAG12|QK11
1	53122817	53123894	ST6GALNAC3(dist=127784),ST6GALNAC5(dist=144515)	intergenic	NA	1077|234	s4921,s4922,s4923|s4921,s402166,s4923	b1_1_53122817|b2_1_53122817	-	Reference,KAZ11,KAZ12,QK11,QK12,WZM11,WZM12,YUN11,YUN12,KER11,KER12,DOR11,FRI12,MER12,ROM11,ROM12,SFK11,SFK12,TEX11,TEX12,CHA11,CHA12,WDU11,RMV11,RMV12,WAG11,WAG12|DOR12,FRI11,MER11,WDU12
1	53641380	53643692	PIGK	intronic	NA	2312|545	s4969,s4970,s4971|s4969,s353579,s4971	b1_1_53641380|b2_1_53641380	-	Reference,KAZ11,KAZ12,QK11,QK12,WZM12,YUN11,YUN12,KER11,KER12,DOR11,DOR12,FRI11,FRI12,MER11,ROM11,WDU11,WDU12,RMV11,WAG12|WZM11,MER12,ROM12,SFK11,SFK12,TEX11,TEX12,CHA11,CHA12,RMV12,WAG11
1	53693985	53695457	PIGK(dist=21155),AK5(dist=47259)	intergenic	NA	1472|943	s4979,s4980,s4981|s4979,s399531,s4981	b1_1_53693985|b2_1_53693985	-	Reference,KAZ11,KAZ12,QK11,QK12,WZM11,WZM12,YUN11,YUN12,KER11,KER12,DOR12,FRI11,MER11,MER12,ROM12,SFK11,SFK12,TEX11,TEX12,CHA11,WDU11,RMV11,RMV12,WAG11,WAG12|DOR11,FRI12,ROM11,CHA12,WDU12
1	53745335	53745477	AK5	intronic	NA	142|828	s4982,s4983,s4984|s4982,s283396,s4984	b1_1_53745335|b2_1_53745335	-	Reference,KAZ12,QK11,QK12,WZM11,YUN12,KER11,DOR11,DOR12,FRI11,FRI12,MER11,MER12,ROM11,SFK11,TEX11,TEX12,CHA11,CHA12,WDU11,WDU12,RMV11,RMV12,WAG11|KAZ11,WZM12,YUN11,KER12,ROM12,SFK12,WAG12
1	54065329	54067551	ZZZ3	intronic	NA	2222|7124	s5012,s5013,s5014,s5015|s5012,s411286,s5014,s5015	b1_1_54065329|b2_1_54065329	-	Reference,KAZ12,QK11,QK12,WZM11,WZM12,YUN11,YUN12,KER11,KER12,DOR11,DOR12,FRI11,FRI12,ROM11,ROM12,SFK11,SFK12,TEX11,TEX12,CHA11,CHA12,WDU11,WDU12,RMV11,RMV12,WAG11,WAG12|MER11,MER12
1	54274215	54274591	MIGA1	intronic	NA	376|742	s5016,s5017,s5018|s5016,s328744,s5018	b1_1_54274215|b2_1_54274215	-	Reference,KAZ11,KAZ12,WZM11,YUN11,YUN12,KER11,KER12,DOR12,FRI11,FRI12,MER12,ROM11,SFK11,SFK12,TEX11,TEX12,CHA11,CHA12,WDU11,WDU12,RMV11,RMV12,WAG11,WAG12|QK11,QK12,WZM12,DOR11,MER11,ROM12
1	54365725	54366034	NEXN	intronic	NA	309|171	s5023,s5024,s5025|s5023,s328745,s5025	b1_1_54365725|b2_1_54365725	-	Reference,KAZ11,KAZ12,WZM12,YUN11,YUN12,KER11,KER12,DOR11,FRI12,MER11,MER12,ROM12,SFK11,SFK12,TEX12,CHA11,CHA12,WDU12,RMV11,RMV12,WAG11|QK11,QK12,WZM11,DOR12,FRI11,ROM11,TEX11,WDU11,WDU12,WAG12
1	54801851	54803132	LOC105614727(dist=210734),PTGFR(dist=137919)	intergenic	NA	1281|1088	s5063,s5064,s5065|s5063,s434013,s5065	b1_1_54801851|b2_1_54801851	-	Reference,KAZ11,KAZ12,QK11,QK12,WZM11,WZM12,YUN11,YUN12,KER11,KER12,DOR11,DOR12,FRI11,FRI12,MER11,MER12,ROM11,ROM12,SFK11,SFK12,TEX11,CHA11,CHA12,WDU11,WDU12,RMV11,RMV12,WAG11,WAG12|TEX12
1	55091447	55091555	IFI44L(dist=2826),IFI44(dist=12179)	intergenic	NA	108|1312	s5094,s5095,s5096|s5094,s307970,s5096	b1_1_55091447|b2_1_55091447	-	Reference,KAZ11,QK11,QK12,WZM11,WZM12,YUN11,YUN12,KER11,KER12,DOR11,DOR12,FRI11,FRI12,MER11,MER12,ROM11,ROM12,SFK11,SFK12,TEX11,TEX12,CHA11,CHA12,WDU11,WDU12,RMV11,RMV12,WAG11,WAG12|KAZ12
1	55554992	55555469	ADGRL4(dist=83862),TRNAW-CCA(dist=1365020)	intergenic	NA	477|953	s5144,s5145,s5146|s5144,s328751,s5146	b1_1_55554992|b2_1_55554992	-	Reference,KAZ11,KAZ12,QK12,WZM11,WZM12,YUN11,YUN12,KER11,KER12,DOR11,DOR12,FRI11,FRI12,MER11,ROM11,ROM12,SFK11,SFK12,TEX11,TEX12,CHA11,CHA12,WDU11,WDU12,RMV11,WAG11,WAG12|QK11,MER12,RMV12
1	55767719	55768175	ADGRL4(dist=296589),TRNAW-CCA(dist=1152314)	intergenic	NA	456|121	s5173,s5174,s5175|s5173,s283421,s5175	b1_1_55767719|b2_1_55767719	-	Reference,DOR12,TEX12|KAZ11,KAZ12,QK11,QK12,WZM11,WZM12,YUN11,YUN12,KER11,KER12,DOR11,FRI11,FRI12,MER11,MER12,ROM11,ROM12,SFK11,SFK12,TEX11,CHA11,CHA12,WDU11,WDU12,RMV11,RMV12,WAG11,WAG12
1	56056146	56056293	ADGRL4(dist=585016),TRNAW-CCA(dist=864196)	intergenic	NA	147|218	s5210,s5211,s5212|s5210,s347280,s5212	b1_1_56056146|b2_1_56056146	-	Reference,KAZ11,KAZ12,QK11,WZM12,KER12,DOR11,DOR12,MER11,MER12,ROM11,TEX11,TEX12,CHA11,WDU11,WDU12,RMV11,RMV12,WAG11|QK12,WZM11,YUN11,YUN12,KER11,FRI11,FRI12,ROM12,SFK11,SFK12,CHA12,WAG12
1	56396603	56396807	ADGRL4(dist=925473),TRNAW-CCA(dist=523682)	intergenic	NA	204|874	s5267,s5268,s5269|s5267,s402170,s5269	b1_1_56396603|b2_1_56396603	-	Reference,KAZ11,KAZ12,QK11,QK12,WZM11,WZM12,YUN11,YUN12,KER11,KER12,DOR11,FRI11,FRI12,MER11,MER12,ROM11,ROM12,SFK11,SFK12,TEX11,TEX12,CHA11,CHA12,WDU11,WDU12,RMV11,RMV12,WAG11,WAG12|DOR12
1	56484320	56488349	ADGRL4(dist=1013190),TRNAW-CCA(dist=432140)	intergenic	NA	4029|232	s5284,s5285,s5286|s5284,s402172,s5286	b1_1_56484320|b2_1_56484320	-	Reference,KAZ11,KAZ12,QK11,QK12,WZM11,WZM12,YUN11,YUN12,KER11,KER12,DOR11,FRI11,FRI12,MER11,ROM11,ROM12,SFK11,SFK12,TEX12,CHA11,CHA12,WDU12,RMV11,RMV12,WAG11,WAG12|DOR12,MER12,TEX11,WDU11
1	57275500	57278476	TRNAW-CCA(dist=354940),LOC114113047(dist=503151)	intergenic	NA	2976|245	s5361,s5362,s5363|s5361,s283440,s5363	b1_1_57275500|b2_1_57275500	-	Reference,KAZ12,WZM12,YUN12,DOR11,SFK12,TEX11,CHA12|KAZ11,QK11,QK12,WZM11,YUN11,KER11,KER12,DOR12,FRI11,FRI12,MER11,MER12,ROM11,ROM12,SFK11,TEX12,CHA11,WDU11,WDU12,RMV11,RMV12,WAG11,WAG12
1	58439793	58440307	ADGRL2	intronic	NA	514|1023	s5487,s5488,s5489|s5487,s283466,s5489	b1_1_58439793|b2_1_58439793	-	Reference,KAZ12,QK11,QK12,WZM11,WZM12,YUN11,YUN12,KER11,KER12,DOR12,FRI12,MER11,MER12,ROM11,ROM12,SFK11,SFK12,TEX12,WDU11,WDU12,RMV11,WAG11,WAG12|KAZ11,DOR11,FRI11,TEX11,CHA11,CHA12,RMV12
1	59201491	59201604	ADGRL2(dist=493339),TTLL7(dist=1650675)	intergenic	NA	113|146	s5533,s5534,s5535|s5533,s283471,s5535	b1_1_59201491|b2_1_59201491	-	Reference,QK11,YUN11,YUN12,KER11,SFK11,TEX11,TEX12,RMV11,RMV12,WAG12|KAZ11,KAZ12,QK12,WZM11,WZM12,KER12,DOR11,DOR12,FRI11,FRI12,MER11,MER12,ROM11,ROM12,SFK12,CHA11,CHA12,WDU11,WDU12,WAG11
1	59524882	59525096	ADGRL2(dist=816730),TTLL7(dist=1327183)	intergenic	NA	214|870	s5566,s5567,s5568|s5566,s388430,s5568	b1_1_59524882|b2_1_59524882	-	Reference,KAZ11,KAZ12,QK11,QK12,WZM11,WZM12,YUN11,KER11,KER12,DOR11,DOR12,FRI11,FRI12,MER11,MER12,ROM11,ROM12,SFK11,SFK12,TEX11,TEX12,CHA11,CHA12,WDU11,WDU12,RMV11,RMV12,WAG11,WAG12|YUN12
1	59564484	59570165	ADGRL2(dist=856332),TTLL7(dist=1282114)	intergenic	NA	5681|1789	s5570,s5571,s5572|s5570,s283477,s5572	b1_1_59564484|b2_1_59564484	-	Reference,KAZ12,WZM11,YUN12,KER11,KER12,DOR11,DOR12,FRI11,FRI12,ROM11,ROM12,SFK12,CHA11,CHA12,WDU11,WDU12,RMV11,RMV12,WAG12|KAZ11,QK11,QK12,WZM12,YUN11,MER11,MER12,SFK11,TEX11,TEX12,WAG11
1	59600105	59600458	ADGRL2(dist=891953),TTLL7(dist=1251821)	intergenic	NA	353|751	s5575,s5576,s5577|s5575,s409860,s5577	b1_1_59600105|b2_1_59600105	-	Reference,KAZ11,KAZ12,QK11,QK12,WZM11,WZM12,YUN11,YUN12,KER11,KER12,DOR11,DOR12,FRI11,MER11,MER12,ROM11,ROM12,SFK11,SFK12,TEX11,TEX12,CHA11,CHA12,WDU11,WDU12,RMV11,RMV12,WAG11,WAG12|FRI12
1	60038061	60038268	ADGRL2(dist=1329909),TTLL7(dist=814011)	intergenic	NA	207|127	s5638,s5639,s5640|s5638,s420509,s5640	b1_1_60038061|b2_1_60038061	-	Reference,KAZ11,KAZ12,QK11,QK12,WZM11,WZM12,YUN11,YUN12,KER11,KER12,DOR11,DOR12,FRI11,FRI12,MER11,MER12,ROM11,SFK11,SFK12,TEX12,CHA11,CHA12,WDU11,WDU12,RMV11,WAG11,WAG12|ROM12,TEX11,RMV12
1	60083649	60090184	ADGRL2(dist=1375497),TTLL7(dist=762095)	intergenic	NA	6535|148	s5647,s5648,s5649|s5647,s365014,s5649	b1_1_60083649|b2_1_60083649	-	Reference,KAZ11,KAZ12,QK11,QK12,WZM11,WZM12,YUN11,KER11,KER12,DOR11,DOR12,FRI11,FRI12,MER11,MER12,ROM11,ROM12,SFK11,SFK12,TEX11,TEX12,CHA11,CHA12,WDU11,WDU12,RMV11,RMV12,WAG11|WAG12
1	60280981	60281262	ADGRL2(dist=1572829),TTLL7(dist=571017)	intergenic	NA	281|375	s5689,s5690,s5691|s5689,s328784,s5691	b1_1_60280981|b2_1_60280981	-	Reference,KAZ11,KAZ12,QK12,WZM11,YUN12,DOR12,MER12,TEX11,CHA11,CHA12,WDU11,WDU12,RMV11,RMV12,WAG11,WAG12|QK11,WZM12,YUN11,YUN12,KER11,KER12,DOR11,FRI11,FRI12,MER11,ROM11,ROM12,SFK11,SFK12,TEX12
1	60317629	60319519	ADGRL2(dist=1609477),TTLL7(dist=532760)	intergenic	NA	1890|1890	s5694,s5695,s5696|s5694,s440766,s5696	b1_1_60317629|b2_1_60317629	-	Reference,KAZ11,KAZ12,QK11,QK12,WZM11,WZM12,YUN11,YUN12,KER11,KER12,DOR11,DOR12,FRI11,FRI12,MER11,MER12,ROM11,ROM12,SFK11,SFK12,TEX11,TEX12,CHA11,CHA12,WDU11,RMV11,RMV12,WAG11,WAG12|WDU12
1	61670437	61671169	CTBS(dist=56555),LOC101110888(dist=1703)	intergenic	NA	732|167	s5791,s5792,s5793|s5791,s372949,s5793	b1_1_61670437|b2_1_61670437	-	Reference,KAZ11,KAZ12,QK11,QK12,WZM12,YUN11,YUN12,KER11,KER12,DOR11,DOR12,FRI11,FRI12,MER11,ROM11,ROM12,SFK12,TEX11,TEX12,CHA11,CHA12,WDU11,WDU12,RMV11,WAG11,WAG12|WZM11,SFK11,RMV12
1	63180312	63180713	COL24A1	intronic	NA	401|3414	s5922,s5923,s5924|s5922,s308022,s5924	b1_1_63180312|b2_1_63180312	-	Reference,KAZ11,QK11,YUN12,KER11,FRI12,SFK12,TEX12,RMV12|KAZ12,QK12,WZM11,WZM12,YUN11,KER12,DOR11,DOR12,FRI11,MER11,MER12,ROM11,ROM12,SFK11,TEX11,CHA11,CHA12,WDU11,WDU12,RMV11,WAG11,WAG12
1	63363802	63365070	TRNAV-CAC(dist=68305),ODF2L(dist=88901)	intergenic	NA	1268|1459	s5943,s5944,s5945|s5943,s283529,s5945	b1_1_63363802|b2_1_63363802	-	Reference|KAZ11,KAZ12,QK11,QK12,WZM11,WZM12,YUN11,YUN12,KER11,KER12,DOR11,DOR12,FRI11,FRI12,MER11,MER12,ROM11,ROM12,SFK11,SFK12,TEX11,TEX12,CHA11,CHA12,WDU11,WDU12,RMV11,RMV12,WAG11,WAG12
1	63701513	63701964	LOC101115586(dist=26714),LOC101116002(dist=30929)	intergenic	NA	451|12388	s5967,s5968,s5969|s5967,s308028,s434018,s5969	b1_1_63701513|b2_1_63701513	-	Reference,KAZ11,QK11,QK12,WZM11,WZM12,YUN11,YUN12,KER11,KER12,DOR11,DOR12,FRI11,FRI12,MER11,MER12,ROM11,ROM12,SFK11,SFK12,TEX11,CHA11,CHA12,WDU11,WDU12,RMV11,RMV12,WAG11,WAG12|TEX12
1	64308937	64309550	HS2ST1(dist=115433),LMO4(dist=132007)	intergenic	NA	613|638	s6009,s6010,s6011|s6009,s365021,s6011	b1_1_64308937|b2_1_64308937	-	Reference,KAZ11,KAZ12,QK11,QK12,WZM11,WZM12,YUN11,YUN12,KER11,KER12,DOR11,DOR12,FRI11,MER11,ROM11,ROM12,SFK11,TEX12,CHA11,CHA12,WDU11,RMV11,WAG11|FRI12,MER12,SFK12,TEX11,WDU12,RMV12,WAG12
1	64766248	64766361	LMO4(dist=308019),TRNAE-CUC(dist=204127)	intergenic	NA	113|129	s6034,s6035,s6036|s6034,s406876,s6036	b1_1_64766248|b2_1_64766248	-	Reference,KAZ11,KAZ12,QK11,QK12,WZM11,WZM12,YUN11,YUN12,KER11,KER12,DOR11,DOR12,FRI12,MER11,MER12,ROM11,ROM12,SFK11,SFK12,TEX11,TEX12,CHA12,WDU11,RMV11,RMV12,WAG11,WAG12|FRI11,CHA11,WDU12
1	65280447	65280553	TRNAE-CUC(dist=309887),PKN2(dist=653664)	intergenic	NA	106|125	s6063,s6064,s6065|s6063,s422173,s6065	b1_1_65280447|b2_1_65280447	-	Reference,KAZ11,KAZ12,QK11,QK12,WZM11,WZM12,YUN11,YUN12,KER11,KER12,DOR11,DOR12,FRI11,FRI12,MER11,MER12,ROM11,ROM12,SFK11,SFK12,TEX11,TEX12,CHA11,CHA12,WDU11,WDU12,RMV11,WAG11,WAG12|RMV12
1	66407136	66407337	LOC105614852	intronic	NA	201|178	s6167,s6168,s6169|s6167,s328823,s6169	b1_1_66407136|b2_1_66407136	-	Reference,KAZ11,QK12,WZM12,YUN11,DOR11,DOR12,FRI12,ROM12,SFK12,TEX11,CHA12,RMV11,RMV12,WAG11|KAZ12,QK11,WZM11,YUN12,KER11,KER12,FRI11,MER11,MER12,ROM11,SFK11,TEX12,CHA11,WDU12,WAG12
1	66408172	66411435	LOC105614852	intronic	NA	3263|629	s6169,s6170,s6171|s6169,s328824,s6171	b1_1_66408172|b2_1_66408172	-	Reference,KAZ11,QK12,WZM12,YUN11,DOR11,DOR12,FRI12,ROM12,SFK12,TEX11,CHA12,RMV11,RMV12,WAG11|KAZ12,QK11,WZM11,YUN12,KER11,KER12,FRI11,MER11,MER12,ROM11,SFK11,TEX12,CHA11,WDU12,WAG12
1	66459453	66459663	LOC101120367	intronic	NA	210|216	s6181,s6182,s6183|s6181,s439272,s6183	b1_1_66459453|b2_1_66459453	-	Reference,KAZ11,KAZ12,QK11,QK12,WZM11,WZM12,YUN11,YUN12,KER11,KER12,DOR11,DOR12,FRI11,FRI12,MER11,MER12,ROM11,ROM12,SFK11,SFK12,TEX11,TEX12,CHA11,WDU12,RMV11,WAG11,WAG12|noassemb
1	66462437	66467021	LOC101120367	intronic	NA	4584|3063	s6183,s6184,s6185|s6183,s439273,s6185	b1_1_66462437|b2_1_66462437	-	Reference,KAZ11,KAZ12,QK11,QK12,WZM11,WZM12,YUN11,YUN12,KER11,KER12,DOR11,DOR12,FRI11,FRI12,MER11,MER12,ROM11,ROM12,SFK11,SFK12,TEX11,TEX12,CHA11,WDU12,RMV11,WAG11,WAG12|noassemb
1	66468154	66468365	LOC101120367	intronic	NA	211|860	s6185,s6186,s6187|s6185,s439274,s6187	b1_1_66468154|b2_1_66468154	-	Reference,KAZ11,KAZ12,QK11,QK12,WZM11,WZM12,YUN11,YUN12,KER11,KER12,DOR11,DOR12,FRI11,FRI12,MER11,MER12,ROM11,ROM12,SFK11,SFK12,TEX11,TEX12,CHA11,WDU12,RMV11,WAG11,WAG12|noassemb
1	66475028	66475319	LOC101120367(dist=5747),LOC101120617(dist=23478)	intergenic	NA	291|1929	s6187,s6188,s6189|s6187,s439275,s6189	b1_1_66475028|b2_1_66475028	-	Reference,KAZ11,KAZ12,QK11,QK12,WZM11,WZM12,YUN11,YUN12,KER11,KER12,DOR11,DOR12,FRI11,FRI12,MER11,MER12,ROM11,ROM12,SFK11,SFK12,TEX11,TEX12,CHA11,WDU12,RMV11,WAG11,WAG12|noassemb
1	66479731	66484369	LOC101120367(dist=10450),LOC101120617(dist=14428)	intergenic	NA	4638|2901	s6191,s6192,s6193|s6191,s439277,s6193	b1_1_66479731|b2_1_66479731	-	Reference,KAZ11,KAZ12,QK11,QK12,WZM11,WZM12,YUN11,YUN12,KER11,KER12,DOR11,DOR12,FRI11,FRI12,MER11,MER12,ROM11,ROM12,SFK11,SFK12,TEX11,TEX12,CHA11,WDU12,RMV11,WAG11,WAG12|noassemb
1	66504600	66504749	LOC101120617	intronic	NA	149|179	s6200,s6201,s6202|s6200,s439281,s6202	b1_1_66504600|b2_1_66504600	-	Reference,KAZ11,KAZ12,QK11,QK12,WZM11,WZM12,YUN11,YUN12,KER11,KER12,DOR11,DOR12,FRI11,FRI12,MER11,MER12,ROM11,ROM12,SFK11,SFK12,TEX11,TEX12,CHA11,WDU12,RMV11,WAG11,WAG12|noassemb
1	66527702	66527803	LOC101120617(dist=7377),LOC101105481(dist=22838)	intergenic	NA	101|135	s6210,s6211,s6212|s6210,s439285,s6212	b1_1_66527702|b2_1_66527702	-	Reference,KAZ11,KAZ12,QK11,QK12,WZM11,WZM12,YUN11,YUN12,KER11,KER12,DOR11,DOR12,FRI11,FRI12,MER11,MER12,ROM11,ROM12,SFK11,SFK12,TEX11,TEX12,CHA11,WDU12,RMV11,RMV12,WAG11,WAG12|noassemb
1	66529643	66529765	LOC101120617(dist=9318),LOC101105481(dist=20876)	intergenic	NA	122|156	s6217,s6218,s6219,s6220,s6221|s6217,s6218,s359129,s6220,s6221	b1_1_66529643|b2_1_66529643	-	Reference,KAZ11,KAZ12,QK11,QK12,WZM11,WZM12,YUN11,YUN12,KER11,KER12,DOR11,DOR12,FRI11,FRI12,MER11,MER12,ROM11,ROM12,SFK11,SFK12,TEX11,TEX12,CHA11,WDU12,RMV11,RMV12,WAG12|WAG11
1	66538922	66539093	LOC101120617(dist=18597),LOC101105481(dist=11548)	intergenic	NA	171|142	s6225,s6226,s6227|s6225,s359132,s6227	b1_1_66538922|b2_1_66538922	-	Reference,KAZ11,KAZ12,QK11,QK12,WZM11,WZM12,YUN11,YUN12,KER11,KER12,DOR11,DOR12,FRI11,FRI12,MER11,MER12,ROM11,ROM12,SFK11,SFK12,TEX11,TEX12,CHA11,WDU12,RMV11,RMV12,WAG12|WAG11
1	66718718	66718874	LOC114115616(dist=30479),LOC101114579(dist=2624)	intergenic	NA	156|166	s6238,s6239,s6240|s6238,s440357,s6240	b1_1_66718718|b2_1_66718718	-	Reference,KAZ11,KAZ12,QK11,QK12,WZM11,WZM12,YUN11,YUN12,KER11,KER12,DOR11,DOR12,FRI11,FRI12,MER11,MER12,ROM11,ROM12,SFK11,SFK12,TEX12,CHA11,CHA12,WDU12,RMV11,RMV12,WAG11,WAG12|WDU11
1	66723365	66724614	LOC101114579	exonic	NA	1249|2563	s6244,s6245,s6246|s6244,s440359,s6246	b1_1_66723365|b2_1_66723365	-	Reference,KAZ11,KAZ12,QK11,QK12,WZM11,WZM12,YUN11,YUN12,KER11,KER12,DOR11,DOR12,FRI11,FRI12,MER11,MER12,ROM11,ROM12,SFK11,SFK12,TEX12,CHA11,CHA12,WDU12,RMV11,RMV12,WAG11,WAG12|WDU11
1	66731503	66735832	LOC101114579	intronic	NA	4329|492	s6246,s6247,s6248|s6246,s440360,s6248	b1_1_66731503|b2_1_66731503	-	Reference,KAZ11,KAZ12,QK11,QK12,WZM11,WZM12,YUN11,YUN12,KER11,KER12,DOR11,DOR12,FRI11,FRI12,MER11,MER12,ROM11,ROM12,SFK11,SFK12,TEX12,CHA11,CHA12,WDU12,RMV11,RMV12,WAG11,WAG12|WDU11
1	66742908	66743110	LOC101114579	upstream	NA	202|167	s6250,s6251,s6252|s6250,s440362,s6252	b1_1_66742908|b2_1_66742908	-	Reference,KAZ11,KAZ12,QK11,QK12,WZM11,WZM12,YUN11,YUN12,KER11,KER12,DOR11,DOR12,FRI11,FRI12,MER11,MER12,ROM11,ROM12,SFK11,SFK12,TEX11,TEX12,CHA11,CHA12,WDU12,RMV11,RMV12,WAG11,WAG12|WDU11
1	66762195	66762383	LOC101120875	downstream	NA	188|431	s6263,s6264,s6265|s6263,s440367,s6265	b1_1_66762195|b2_1_66762195	-	Reference,KAZ11,KAZ12,QK11,QK12,WZM11,WZM12,YUN11,YUN12,KER11,KER12,DOR11,DOR12,FRI11,FRI12,MER11,MER12,ROM11,ROM12,SFK11,SFK12,TEX11,TEX12,CHA11,CHA12,WDU12,RMV11,RMV12,WAG11,WAG12|WDU11
1	66774210	66776900	LOC101120875	intronic	NA	2690|525	s6267,s6268,s6269|s6267,s440369,s6269	b1_1_66774210|b2_1_66774210	-	Reference,KAZ11,KAZ12,QK11,QK12,WZM11,WZM12,YUN11,YUN12,KER11,KER12,DOR11,DOR12,FRI11,FRI12,MER11,MER12,ROM11,ROM12,SFK11,SFK12,TEX11,TEX12,CHA11,CHA12,WDU12,RMV11,RMV12,WAG11,WAG12|WDU11
1	67292329	67292521	LRRC8D	intronic	NA	192|324	s6297,s6298,s6299|s6297,s283556,s6299	b1_1_67292329|b2_1_67292329	-	Reference,KAZ12,QK12,WZM11,WZM12,YUN11,YUN12,KER11,KER12,DOR11,DOR12,FRI11,FRI12,MER11,MER12,ROM11,ROM12,SFK11,SFK12,TEX11,TEX12,WDU11,WDU12,RMV11,RMV12,WAG11,WAG12|KAZ11,QK11,CHA11,CHA12
1	67569021	67569144	TRNAC-ACA(dist=35848),LOC443297(dist=458695)	intergenic	NA	123|122	s6317,s6318,s6319|s6317,s389991,s6319	b1_1_67569021|b2_1_67569021	-	Reference,KAZ11,KAZ12,QK11,QK12,WZM11,WZM12,YUN11,YUN12,DOR11,DOR12,FRI11,FRI12,MER11,MER12,ROM11,ROM12,SFK11,TEX12,CHA11,CHA12,WDU11,WDU12,RMV11,RMV12,WAG11,WAG12|KER11,KER12,SFK12,TEX11
1	67852383	67853972	TRNAC-ACA(dist=319210),LOC443297(dist=173867)	intergenic	NA	1589|3361	s6336,s6337,s6338|s6336,s283562,s6338	b1_1_67852383|b2_1_67852383	-	Reference,QK12,WZM12,YUN11,FRI11,FRI12,MER11,ROM11,TEX12,WDU12,RMV11,WAG11|KAZ11,KAZ12,QK11,WZM11,YUN12,KER11,KER12,DOR11,DOR12,MER12,ROM12,SFK11,SFK12,TEX11,CHA11,CHA12,WDU11,RMV12,WAG12
1	67951649	67959066	TRNAC-ACA(dist=418476),LOC443297(dist=68773)	intergenic	NA	7417|259	s6341,s6342,s6343|s6341,s349884,s6343	b1_1_67951649|b2_1_67951649	-	Reference,KAZ11,KAZ12,QK11,WZM11,WZM12,YUN11,KER11,KER12,DOR11,DOR12,FRI11,FRI12,MER11,MER12,ROM11,ROM12,SFK11,SFK12,TEX11,TEX12,CHA11,CHA12,WDU11,WDU12,RMV11,RMV12,WAG11,WAG12|QK12,YUN12
1	68143789	68144642	BARHL2(dist=53670),LOC121819686(dist=43964)	intergenic	NA	853|4389	s6357,s6358,s6359|s6357,s381877,s6359	b1_1_68143789|b2_1_68143789	-	Reference,KAZ11,KAZ12,QK11,QK12,WZM11,WZM12,KER11,KER12,DOR11,DOR12,FRI11,FRI12,MER11,ROM12,SFK11,SFK12,CHA11,CHA12,WDU11,WDU12,RMV11,WAG11,WAG12|YUN11,YUN12,MER12,ROM11,TEX11,TEX12,RMV12
1	68807247	68807726	CDC7	exonic	NA	479|476	s6404,s6405,s6406|s6404,s423165,s6406	b1_1_68807247|b2_1_68807247	-	Reference,KAZ11,KAZ12,QK11,QK12,WZM11,WZM12,YUN11,YUN12,KER11,KER12,DOR11,DOR12,FRI11,FRI12,MER11,MER12,ROM12,SFK11,SFK12,TEX11,TEX12,CHA11,CHA12,WDU11,WDU12,RMV11,RMV12,WAG11,WAG12|ROM11
1	69192740	69193444	TGFBR3(dist=34088),LOC114115646(dist=4393)	intergenic	NA	704|1014	s6423,s6424,s6425|s6423,s399553,s6425	b1_1_69192740|b2_1_69192740	-	Reference,KAZ11,KAZ12,QK11,QK12,WZM11,WZM12,YUN11,YUN12,KER11,KER12,DOR12,FRI11,FRI12,MER11,MER12,ROM11,ROM12,SFK11,SFK12,TEX11,TEX12,CHA11,CHA12,WDU11,WDU12,RMV11,RMV12,WAG11,WAG12|DOR11
1	71673009	71673186	F3(dist=27079),LOC121819811(dist=187032)	intergenic	NA	177|223	s6554,s6555,s6556|s6554,s308072,s6556	b1_1_71673009|b2_1_71673009	-	Reference,KAZ11,QK11,WZM11,KER11,DOR12,FRI11,SFK11,SFK12,TEX11,CHA12,WDU12,RMV11,WAG11|KAZ12,QK12,WZM12,YUN11,YUN12,KER12,DOR11,FRI12,MER11,MER12,ROM11,ROM12,TEX12,CHA11,RMV12,WAG12
1	72699358	72705193	RWDD3(dist=339431),TRNAC-GCA(dist=378132)	intergenic	NA	5835|6838	s6622,s6623,s6624|s6622,s375160,s6624	b1_1_72699358|b2_1_72699358	-	Reference,KAZ11,KAZ12,QK11,QK12,WZM11,YUN11,YUN12,KER11,KER12,DOR11,DOR12,FRI11,FRI12,MER11,MER12,ROM12,SFK11,SFK12,TEX11,TEX12,CHA11,CHA12,RMV11,WAG11,WAG12|WZM12,ROM11,WDU11,WDU12,RMV12
1	72936690	72936880	RWDD3(dist=576763),TRNAC-GCA(dist=146445)	intergenic	NA	190|379	s6636,s6637,s6638|s6636,s283586,s6638	b1_1_72936690|b2_1_72936690	-	Reference,KER12,DOR11,DOR12,FRI11,MER12,ROM11,SFK11,TEX11,TEX12|KAZ11,KAZ12,QK11,QK12,WZM11,WZM12,YUN11,YUN12,KER11,FRI12,MER11,ROM12,SFK12,CHA11,CHA12,WDU11,WDU12,RMV11,RMV12,WAG11,WAG12
1	73378367	73379884	TRNAC-GCA(dist=294971),PTBP2(dist=468476)	intergenic	NA	1517|217	s6698,s6699,s6700|s6698,s282335,s6700	b1_1_73378367|b2_1_73378367	-	Reference,WZM11,WZM12,MER12,ROM11,ROM12,SFK11,CHA11,CHA12,WDU11,WDU12,WAG11,WAG12|KAZ11,KAZ12,QK11,QK12,YUN11,YUN12,KER11,KER12,DOR11,DOR12,FRI11,FRI12,MER11,SFK12,TEX11,TEX12,RMV11,RMV12
1	74440655	74440846	DPYD	intronic	NA	191|173	s6793,s6794,s6795|s6793,s365050,s6795	b1_1_74440655|b2_1_74440655	-	Reference,KAZ11,KAZ12,QK11,QK12,WZM11,WZM12,YUN12,KER11,KER12,DOR11,DOR12,FRI11,FRI12,MER11,MER12,ROM11,ROM12,SFK11,SFK12,TEX11,TEX12,CHA11,CHA12,WDU11,WDU12,RMV11,RMV12,WAG11|YUN11,WAG12
1	74945402	74946084	DPYD	intronic	NA	682|113	s6857,s6858,s6859|s6857,s426820,s6859	b1_1_74945402|b2_1_74945402	-	Reference,KAZ11,KAZ12,QK11,QK12,WZM11,WZM12,YUN11,YUN12,KER11,KER12,DOR11,DOR12,FRI11,FRI12,MER11,MER12,ROM11,SFK11,SFK12,TEX11,TEX12,CHA11,CHA12,WDU11,WDU12,RMV11,RMV12,WAG11,WAG12|ROM12
1	74961145	74961352	DPYD	intronic	NA	207|1247	s6860,s6861,s6862|s6860,s426821,s6862	b1_1_74961145|b2_1_74961145	-	Reference,KAZ11,KAZ12,QK11,QK12,WZM11,WZM12,YUN11,YUN12,KER11,KER12,DOR11,DOR12,FRI11,FRI12,MER11,MER12,ROM11,SFK11,SFK12,TEX11,TEX12,CHA11,CHA12,WDU11,WDU12,RMV11,RMV12,WAG11,WAG12|ROM12
1	75159583	75159747	DPYD	intronic	NA	164|106	s6880,s6881,s6882|s6880,s347169,s6882	b1_1_75159583|b2_1_75159583	-	Reference,KAZ11,KAZ12,QK11,WZM11,WZM12,YUN11,YUN12,KER11,DOR11,FRI11,FRI12,MER11,MER12,SFK11,TEX11,CHA11,CHA12,WDU11,WDU12,RMV11,WAG11|QK12,KER12,DOR12,ROM11,ROM12,TEX12,RMV12,WAG12
1	75739784	75739884	DPYD(dist=557706),SNX7(dist=240021)	intergenic	NA	100|336	s6917,s6918,s6919|s6917,s282361,s6919	b1_1_75739784|b2_1_75739784	-	Reference,KER12,DOR11,DOR12,MER11,ROM12,SFK12,TEX11,TEX12|KAZ11,KAZ12,QK11,QK12,WZM11,WZM12,YUN11,YUN12,KER11,FRI11,FRI12,MER12,ROM11,SFK11,CHA11,CHA12,WDU11,WDU12,RMV11,RMV12,WAG11,WAG12
1	75935348	75935593	DPYD(dist=753270),SNX7(dist=44312)	intergenic	NA	245|1451	s6937,s6938,s6939|s6937,s373718,s6939	b1_1_75935348|b2_1_75935348	-	Reference,KAZ11,KAZ12,QK11,QK12,WZM12,YUN11,YUN12,KER11,KER12,DOR11,DOR12,FRI12,MER11,MER12,ROM11,ROM12,SFK11,SFK12,TEX12,CHA11,CHA12,WDU12,RMV11,RMV12,WAG11,WAG12|WZM11,FRI11,TEX11,WDU11
1	76120712	76122852	SNX7	intronic	NA	2140|300	s6946,s6947,s6948|s6946,s282367,s6948	b1_1_76120712|b2_1_76120712	-	Reference,KAZ12,QK12,YUN12,FRI12,MER11,MER12,TEX12,CHA12|KAZ11,QK11,WZM11,WZM12,YUN11,KER11,KER12,DOR11,DOR12,FRI11,ROM11,ROM12,SFK11,SFK12,TEX11,CHA11,WDU11,WDU12,RMV11,RMV12,WAG11,WAG12
1	76320878	76321225	PLPPR5	intronic	NA	347|347	s6980,s6981,s6982|s6980,s421856,s6982	b1_1_76320878|b2_1_76320878	-	Reference,KAZ11,KAZ12,QK11,QK12,WZM11,WZM12,YUN11,YUN12,KER11,KER12,DOR11,DOR12,FRI11,FRI12,MER11,MER12,ROM11,ROM12,SFK11,SFK12,TEX11,TEX12,CHA11,CHA12,WDU11,WDU12,RMV11,WAG11,WAG12|RMV12
1	76752188	76752382	PLPPR4(dist=33518),PALMD(dist=302570)	intergenic	NA	194|133	s7029,s7030,s7031|s7029,s412018,s7031	b1_1_76752188|b2_1_76752188	-	Reference,KAZ11,KAZ12,QK11,QK12,WZM11,WZM12,YUN11,YUN12,KER11,KER12,DOR11,DOR12,FRI11,FRI12,MER12,ROM11,SFK11,SFK12,TEX12,CHA11,CHA12,WDU11,WDU12,RMV11,RMV12,WAG11,WAG12|MER11,ROM12,TEX12,WDU12
1	77341894	77342068	AGL(dist=34206),SLC35A3(dist=11352)	intergenic	NA	174|174	s7083,s7084,s7085|s7083,s422736,s7085	b1_1_77341894|b2_1_77341894	-	Reference,KAZ11,KAZ12,QK11,QK12,WZM11,WZM12,YUN11,YUN12,KER11,KER12,DOR11,DOR12,FRI11,FRI12,MER11,MER12,ROM11,ROM12,SFK11,SFK12,TEX11,TEX12,CHA11,CHA12,WDU11,WDU12,RMV11,WAG11,WAG12|RMV12
1	77593411	77593740	DBT	intronic	NA	329|397	s7106,s7107,s7108|s7106,s308110,s7108	b1_1_77593411|b2_1_77593411	-	Reference,KAZ11,QK11,QK12,WZM12,YUN11,YUN12,KER11,KER12,DOR11,DOR12,FRI11,MER11,MER12,ROM11,SFK11,SFK12,TEX11,TEX12,CHA11,WDU12,RMV11,RMV12,WAG11,WAG12|KAZ12,WZM11,FRI12,ROM12,CHA12,WDU11,WDU12
1	77898720	77899273	GPR88(dist=8220),LOC101113636(dist=127411)	intergenic	NA	553|529	s7129,s7130,s7131|s7129,s328883,s7131	b1_1_77898720|b2_1_77898720	-	Reference,KAZ11,KAZ12,KER12,DOR11,DOR12,FRI11,MER11,MER12,TEX11,TEX12,CHA11,RMV12,WAG11,WAG12|QK11,QK12,WZM11,WZM12,YUN11,YUN12,KER11,FRI12,ROM11,ROM12,SFK11,SFK12,CHA12,WDU11,WDU12,RMV11
1	78480676	78482464	DPH5(dist=108580),S1PR1(dist=104659)	intergenic	NA	1788|293	s7160,s7161,s7162|s7160,s282403,s7162	b1_1_78480676|b2_1_78480676	-	Reference,KAZ12,QK12,WZM11,WZM12,DOR12,FRI11,MER12,ROM11,ROM12,SFK11,SFK12,TEX11,TEX12,CHA11,CHA12,WDU12,RMV11,RMV12|KAZ11,QK11,YUN11,YUN12,KER11,KER12,DOR11,FRI12,MER11,WDU11,WAG11,WAG12
1	78623650	78627009	TRNAW-CCA(dist=1567),TRNAS-GGA(dist=399588)	intergenic	NA	3359|1262	s7172,s7173,s7174|s7172,s375152,s7174	b1_1_78623650|b2_1_78623650	-	Reference,KAZ11,KAZ12,QK11,WZM11,YUN11,KER11,KER12,DOR11,DOR12,FRI11,FRI12,MER11,MER12,ROM11,ROM12,SFK11,SFK12,TEX11,TEX12,CHA11,CHA12,WDU11,WDU12,RMV11,RMV12,WAG11,WAG12|WZM12
1	78651701	78651807	TRNAW-CCA(dist=29618),TRNAS-GGA(dist=374790)	intergenic	NA	106|106	s7177,s7178,s7179|s7177,s381884,s7179	b1_1_78651701|b2_1_78651701	-	Reference,KAZ11,KAZ12,QK11,WZM11,WZM12,YUN12,KER11,KER12,DOR11,DOR12,FRI11,FRI12,MER11,MER12,ROM11,ROM12,SFK11,SFK12,TEX11,TEX12,CHA11,CHA12,WDU11,WDU12,RMV11,RMV12,WAG11,WAG12|YUN11
1	78930333	78930905	TRNAW-CCA(dist=308250),TRNAS-GGA(dist=95692)	intergenic	NA	572|1473	s7201,s7202,s7203|s7201,s365063,s7203	b1_1_78930333|b2_1_78930333	-	Reference,KAZ11,KAZ12,QK11,QK12,WZM11,YUN12,KER11,KER12,DOR11,DOR12,FRI11,FRI12,MER11,MER12,ROM11,SFK12,TEX11,TEX12,CHA11,CHA12,WDU11,WDU12,RMV11,WAG11|WZM12,YUN11,ROM12,SFK11,RMV12,WAG12
1	79363026	79363146	OLFM3	intronic	NA	120|141	s7247,s7248,s7249|s7247,s422020,s7249	b1_1_79363026|b2_1_79363026	-	Reference,KAZ11,KAZ12,QK11,QK12,WZM11,WZM12,YUN11,YUN12,KER11,KER12,DOR11,DOR12,FRI11,FRI12,MER11,MER12,ROM11,ROM12,SFK11,SFK12,TEX11,TEX12,CHA11,CHA12,WDU11,WDU12,RMV11,WAG11,WAG12|RMV12
1	79569847	79571797	TRNAC-GCA(dist=37594),COL11A1(dist=574169)	intergenic	NA	1950|279	s7290,s7291,s7292|s7290,s365064,s7292	b1_1_79569847|b2_1_79569847	-	Reference,KAZ11,KAZ12,QK11,QK12,WZM11,WZM12,YUN11,YUN12,KER11,KER12,DOR11,DOR12,FRI11,FRI12,MER11,MER12,ROM11,ROM12,SFK11,SFK12,TEX11,TEX12,CHA11,CHA12,WDU11,WDU12,RMV11,RMV12,WAG11|WAG12
1	79597978	79598156	TRNAC-GCA(dist=65725),COL11A1(dist=547810)	intergenic	NA	178|140	s7293,s7294,s7295|s7293,s432937,s7295	b1_1_79597978|b2_1_79597978	-	Reference,KAZ11,WZM12,SFK12|KAZ12,QK11,QK12,WZM11,YUN11,YUN12,KER11,KER12,DOR11,DOR12,FRI11,FRI12,MER11,MER12,ROM11,ROM12,SFK11,TEX11,TEX12,CHA11,CHA12,WDU11,WDU12,RMV11,RMV12,WAG11,WAG12
1	79756343	79756697	TRNAC-GCA(dist=224090),COL11A1(dist=389269)	intergenic	NA	354|358	s7311,s7312,s7313|s7311,s365066,s7313	b1_1_79756343|b2_1_79756343	-	Reference,CHA11|KAZ11,KAZ12,QK11,QK12,WZM11,WZM12,YUN11,YUN12,KER11,KER12,DOR11,DOR12,FRI11,FRI12,MER11,MER12,ROM11,ROM12,SFK11,SFK12,TEX12,CHA12,WDU11,WDU12,RMV11,RMV12,WAG11,WAG12
1	79802733	79802877	TRNAC-GCA(dist=270480),COL11A1(dist=343089)	intergenic	NA	144|125	s7313,s7314,s7315|s7313,s282426,s7315	b1_1_79802733|b2_1_79802733	-	Reference,KAZ12,QK11,WZM12,YUN11,DOR11,DOR12,FRI11,FRI12,ROM11,SFK11,SFK12,TEX12,CHA11,CHA12,RMV11,RMV12|KAZ11,QK12,WZM11,YUN12,KER11,KER12,MER11,MER12,ROM12,WDU11,WDU12,WAG11,WAG12
1	79903847	79904697	TRNAC-GCA(dist=371594),COL11A1(dist=241269)	intergenic	NA	850|6314	s7330,s7331,s7332|s7330,s282431,s7332	b1_1_79903847|b2_1_79903847	-	Reference,KAZ12,QK11,QK12,WZM11,WZM12,YUN11,YUN12,KER11,KER12,DOR11,DOR12,FRI11,FRI12,MER12,ROM11,ROM12,SFK12,TEX12,CHA11,CHA12,WDU11,WDU12,RMV11,RMV12,WAG11,WAG12|KAZ11,MER11,SFK11
1	80591948	80592237	TRNAS-AGA(dist=131407),RNPC3(dist=210247)	intergenic	NA	289|385	s7394,s7395,s7396|s7394,s308129,s7396	b1_1_80591948|b2_1_80591948	-	Reference,KAZ11,MER12,ROM11,CHA11|KAZ12,QK11,QK12,WZM11,WZM12,YUN11,YUN12,KER11,KER12,DOR11,DOR12,FRI11,FRI12,MER11,ROM12,SFK11,SFK12,TEX12,CHA12,WDU11,WDU12,RMV11,RMV12,WAG11,WAG12
1	80673985	80674704	TRNAS-AGA(dist=213444),RNPC3(dist=127780)	intergenic	NA	719|2030	s7406,s7407,s7408|s7406,s328896,s7408	b1_1_80673985|b2_1_80673985	-	Reference,KAZ11,KAZ12,WZM11,WZM12,YUN11,YUN12,KER11,DOR11,DOR12,FRI11,MER12,ROM11,ROM12,SFK11,SFK12,TEX12,CHA11,CHA12,WDU11,WDU12,WAG11,WAG12|QK11,QK12,KER12,FRI12,MER11,RMV11,RMV12
1	80976282	80976385	LOC101118831(dist=66917),LOC101119090(dist=253138)	intergenic	NA	103|1868	s7447,s7448,s7449|s7447,s427167,s7449	b1_1_80976282|b2_1_80976282	-	Reference,KAZ11,KAZ12,QK11,QK12,WZM11,WZM12,YUN11,YUN12,KER11,KER12,DOR11,DOR12,FRI11,FRI12,MER11,MER12,ROM11,SFK11,SFK12,TEX11,TEX12,CHA11,CHA12,WDU11,WDU12,RMV11,RMV12,WAG11,WAG12|ROM12
1	81394617	81394922	LOC114116098(dist=124767),TRNAS-GGA(dist=231690)	intergenic	NA	305|4545	s7513,s7514,s7515|s7513,s402508,s7515	b1_1_81394617|b2_1_81394617	-	Reference,KAZ11,KAZ12,QK11,QK12,WZM11,WZM12,YUN11,YUN12,KER11,KER12,DOR11,FRI12,MER11,MER12,ROM12,SFK11,SFK12,TEX11,TEX12,CHA11,CHA12,WDU11,RMV11,RMV12,WAG11,WAG12|DOR12,FRI11,ROM11,WDU12
1	81687694	81687950	TRNAS-GGA(dist=61010),NONE(dist=NONE)	intergenic	NA	256|2167	s7553,s7554,s7555|s7553,s375139,s7555	b1_1_81687694|b2_1_81687694	-	Reference,KAZ11,KAZ12,QK11,QK12,WZM11,YUN11,YUN12,KER11,KER12,DOR11,DOR12,FRI11,FRI12,MER11,MER12,ROM11,ROM12,SFK12,TEX11,TEX12,CHA11,CHA12,WDU11,WDU12,RMV11,RMV12,WAG11,WAG12|WZM12
1	81811397	81811671	TRNAS-GGA(dist=184713),NONE(dist=NONE)	intergenic	NA	274|1523	s7582,s7583,s7584|s7582,s373737,s7584	b1_1_81811397|b2_1_81811397	-	Reference,KAZ11,KAZ12,QK11,QK12,WZM12,YUN11,YUN12,KER11,KER12,DOR11,DOR12,FRI11,FRI12,MER11,MER12,ROM11,ROM12,SFK12,TEX11,TEX12,CHA11,CHA12,WDU11,WDU12,RMV11,RMV12,WAG11,WAG12|WZM11
1	81983350	81983589	TRNAS-GGA(dist=356666),NONE(dist=NONE)	intergenic	NA	239|528	s7602,s7603,s7604|s7602,s348026,s7604	b1_1_81983350|b2_1_81983350	-	Reference,KAZ11,KAZ12,QK11,WZM11,WZM12,YUN12,DOR11,DOR12,FRI11,MER11,ROM11,ROM12,SFK12,TEX11,TEX12,CHA11,CHA12,RMV11,WAG11,WAG12|QK12,YUN11,KER11,KER12,FRI12,SFK11,WDU11,WDU12
1	82194402	82194777	TRNAS-GGA(dist=567718),NONE(dist=NONE)	intergenic	NA	375|375	s7636,s7637,s7638|s7636,s426580,s7638	b1_1_82194402|b2_1_82194402	-	Reference,KAZ11,KAZ12,QK11,QK12,WZM11,WZM12,YUN11,YUN12,KER11,KER12,DOR11,DOR12,FRI11,FRI12,MER11,MER12,ROM11,SFK11,TEX11,TEX12,CHA11,CHA12,WDU11,WDU12,RMV11,RMV12,WAG11,WAG12|ROM12
1	82258944	82260788	TRNAS-GGA(dist=632260),NONE(dist=NONE)	intergenic	NA	1844|112	s7652,s7653,s7654|s7652,s375133,s7654	b1_1_82258944|b2_1_82258944	-	Reference,KAZ11,KAZ12,QK11,QK12,WZM11,YUN11,YUN12,KER11,KER12,DOR11,DOR12,FRI11,FRI12,MER11,MER12,ROM11,ROM12,SFK11,TEX11,TEX12,CHA11,CHA12,WDU11,WDU12,RMV11,RMV12,WAG11,WAG12|WZM12
1	82339990	82340092	TRNAS-GGA(dist=713306),NONE(dist=NONE)	intergenic	NA	102|103	s7668,s7669,s7670|s7668,s431778,s7670	b1_1_82339990|b2_1_82339990	-	Reference,KAZ11,KAZ12,QK11,QK12,WZM11,WZM12,YUN11,YUN12,KER11,KER12,DOR11,DOR12,FRI11,FRI12,MER11,MER12,ROM11,ROM12,SFK11,TEX11,TEX12,CHA11,CHA12,WDU11,WDU12,RMV11,RMV12,WAG11,WAG12|SFK12
1	82632119	82632360	TRNAS-GGA(dist=1005435),PRMT6(dist=1756412)	intergenic	NA	241|333	s7734,s7735,s7736,s7737|s7734,s7735,s273074,s7737	b1_1_82632119|b2_1_82632119	-	Reference,QK11,WZM12,YUN11,KER11,KER12,DOR11,DOR12,MER12,ROM12,SFK11,SFK12,TEX12,CHA12,RMV11,RMV12,WAG11|KAZ11,KAZ12,QK12,FRI11,FRI12,MER11,ROM11,TEX11,CHA11,WDU11,WDU12
1	82724410	82727155	TRNAS-GGA(dist=1097726),PRMT6(dist=1661617)	intergenic	NA	2745|149	s7753,s7754,s7755|s7753,s273069,s7755	b1_1_82724410|b2_1_82724410	-	Reference,WZM12,YUN11,FRI11,FRI12,ROM12,TEX11,CHA12,WDU11|KAZ11,KAZ12,QK11,QK12,WZM11,YUN12,KER11,KER12,DOR11,DOR12,MER11,MER12,ROM11,SFK11,SFK12,TEX12,CHA11,WDU12,RMV11,RMV12,WAG11,WAG12
1	82790180	82792616	TRNAS-GGA(dist=1163496),PRMT6(dist=1596156)	intergenic	NA	2436|3689	s7766,s7767,s7768|s7766,s328924,s7768	b1_1_82790180|b2_1_82790180	-	Reference,KAZ11,KAZ12,QK12,WZM11,WZM12,YUN11,YUN12,KER12,DOR11,DOR12,FRI11,FRI12,MER11,MER12,ROM11,ROM12,SFK11,SFK12,TEX11,TEX12,CHA12,WDU11,RMV11,WAG12|QK11,KER11,CHA11,WDU12,RMV12,WAG11
1	82826272	82827176	TRNAS-GGA(dist=1199588),PRMT6(dist=1561596)	intergenic	NA	904|390	s7775,s7776,s7777|s7775,s308157,s7777	b1_1_82826272|b2_1_82826272	-	Reference,KAZ11,QK11,QK12,WZM11,WZM12,YUN11,YUN12,KER11,KER12,DOR12,FRI11,FRI12,MER12,ROM11,ROM12,SFK11,TEX11,TEX12,CHA11,CHA12,WDU11,RMV11,RMV12,WAG11,WAG12|KAZ12,DOR11,MER11,SFK12
1	82943378	82943484	TRNAS-GGA(dist=1316694),PRMT6(dist=1445288)	intergenic	NA	106|567	s7808,s7809,s7810|s7808,s273062,s7810	b1_1_82943378|b2_1_82943378	-	Reference,KAZ12,QK11,WZM12,YUN11,KER11,DOR11,FRI11,FRI12,MER11,MER12,SFK11,TEX11,TEX12,CHA12,WDU12,RMV12,WAG11,WAG12|KAZ11,QK12,WZM11,YUN12,KER12,DOR12,ROM11,ROM12,SFK12,CHA11,WDU11,RMV11
1	83217179	83217292	TRNAS-GGA(dist=1590495),PRMT6(dist=1171480)	intergenic	NA	113|491	s7853,s7854,s7855|s7853,s422817,s7855	b1_1_83217179|b2_1_83217179	-	Reference,KAZ11,KAZ12,QK11,QK12,WZM11,WZM12,YUN11,YUN12,KER11,KER12,DOR11,DOR12,FRI11,FRI12,MER11,MER12,ROM12,SFK11,SFK12,TEX11,TEX12,CHA11,CHA12,WDU11,WDU12,RMV11,WAG11,WAG12|ROM11,RMV12
1	83225576	83225722	TRNAS-GGA(dist=1598892),PRMT6(dist=1163050)	intergenic	NA	146|282	s7855,s7856,s7857|s7855,s273054,s7857	b1_1_83225576|b2_1_83225576	-	Reference,KAZ12,WZM12,YUN11,YUN12,KER11,KER12,MER11,MER12,ROM12,SFK11,SFK12,TEX12,CHA11,CHA12,WDU12,WAG11,WAG12|KAZ11,QK11,QK12,WZM11,DOR11,DOR12,FRI11,FRI12,ROM11,TEX11,WDU11,RMV11,RMV12
1	83328021	83329819	TRNAS-GGA(dist=1701337),PRMT6(dist=1058953)	intergenic	NA	1798|1891	s7868,s7869,s7870|s7868,s438521,s7870	b1_1_83328021|b2_1_83328021	-	Reference,KAZ11,KAZ12,QK11,QK12,WZM11,WZM12,YUN11,YUN12,KER11,KER12,DOR11,DOR12,FRI11,FRI12,MER11,MER12,ROM11,ROM12,SFK11,SFK12,TEX11,TEX12,CHA11,WDU11,WDU12,RMV11,RMV12,WAG11,WAG12|CHA12
1	83436546	83437034	TRNAS-GGA(dist=1809862),PRMT6(dist=951738)	intergenic	NA	488|117	s7883,s7884,s7885|s7883,s365071,s7885	b1_1_83436546|b2_1_83436546	-	Reference,KAZ11,KAZ12,QK11,QK12,WZM12,KER12,DOR11,DOR12,FRI12,MER12,ROM11,ROM12,SFK12,TEX12,CHA12,WDU11,RMV11,RMV12,WAG11|WZM11,YUN11,YUN12,KER11,FRI11,MER11,SFK11,TEX11,CHA11,WDU12,WAG12
1	83820273	83820385	NONE(dist=NONE),PRMT6(dist=568387)	intergenic	NA	112|224	s7936,s7937,s7938|s7936,s387570,s7938	b1_1_83820273|b2_1_83820273	-	Reference,KAZ11,KAZ12,QK11,QK12,WZM11,WZM12,YUN11,KER11,KER12,DOR11,DOR12,FRI11,FRI12,MER11,MER12,ROM11,SFK11,SFK12,TEX11,TEX12,CHA11,CHA12,WDU11,WDU12,RMV11,RMV12,WAG11,WAG12|YUN12
1	84208971	84210349	NONE(dist=NONE),PRMT6(dist=178423)	intergenic	NA	1378|347	s7972,s7973,s7974|s7972,s365076,s7974	b1_1_84208971|b2_1_84208971	-	Reference,KAZ11,KAZ12,QK11,QK12,YUN11,KER11,DOR11,FRI12,MER11,MER12,ROM11,ROM12,CHA11,CHA12,WDU12,RMV11,WAG11|WZM11,WZM12,YUN12,KER12,DOR12,FRI11,SFK11,SFK12,TEX11,TEX12,WDU11,RMV12,WAG12
1	84548474	84548918	NTNG1	intronic	NA	444|2191	s8009,s8010,s8011|s8009,s273037,s8011	b1_1_84548474|b2_1_84548474	-	Reference,WZM11,KER11,MER11,CHA12,WDU11|KAZ11,KAZ12,QK11,QK12,WZM12,YUN11,YUN12,KER12,DOR11,DOR12,FRI11,FRI12,MER12,ROM11,ROM12,SFK11,SFK12,TEX11,TEX12,CHA11,WDU12,RMV11,RMV12,WAG11,WAG12
1	85240750	85241347	VAV3	intronic	NA	597|2051	s8056,s8057,s8058|s8056,s308177,s8058	b1_1_85240750|b2_1_85240750	-	Reference,KAZ11,QK11,QK12,WZM11,YUN11,FRI11,MER11,MER12,SFK11,SFK12,CHA11,CHA12,WDU12,RMV11,RMV12,WAG11,WAG12|KAZ12,WZM12,YUN12,KER11,KER12,DOR11,DOR12,FRI12,ROM11,ROM12,TEX11,TEX12,WDU11
1	85577665	85577946	VAV3(dist=200679),LOC101121132(dist=31201)	intergenic	NA	281|786	s8085,s8086,s8087|s8085,s372736,s8087	b1_1_85577665|b2_1_85577665	-	Reference,KAZ11,KAZ12,QK11,QK12,WZM12,YUN11,YUN12,KER11,KER12,DOR11,DOR12,FRI11,FRI12,MER12,ROM11,ROM12,SFK12,TEX11,TEX12,WDU11,WDU12,RMV11,RMV12,WAG11,WAG12|WZM11,MER11,SFK11,CHA12
1	85676982	85679446	LOC101121132(dist=9076),LOC101121385(dist=12019)	intergenic	NA	2464|241	s8100,s8101,s8102|s8100,s273025,s8102	b1_1_85676982|b2_1_85676982	-	Reference,ROM12|KAZ11,KAZ12,QK11,QK12,WZM11,WZM12,YUN11,YUN12,KER11,KER12,DOR11,DOR12,FRI11,FRI12,MER11,MER12,ROM11,SFK11,SFK12,TEX11,TEX12,CHA11,CHA12,WDU11,WDU12,RMV11,RMV12,WAG11,WAG12
1	87027334	87029054	LOC114108708(dist=2348),LOC101108092(dist=3759)	intergenic	NA	1720|839	s8195,s8196,s8197|s8195,s308191,s8197	b1_1_87027334|b2_1_87027334	-	Reference,KAZ11,KER11,DOR11,FRI11,FRI12,MER12,ROM11,SFK11,CHA12,WDU12,RMV11,WAG12|KAZ12,QK11,QK12,WZM11,WZM12,YUN11,YUN12,KER12,DOR12,MER11,ROM12,SFK12,TEX11,TEX12,CHA11,WDU11,RMV12,WAG11
1	88429909	88430628	LRIF1(dist=87264),DRAM2(dist=26071)	intergenic	NA	719|1637	s8277,s8278,s8279|s8277,s348296,s8279	b1_1_88429909|b2_1_88429909	-	Reference,KAZ11,KAZ12,QK11,WZM11,WZM12,YUN11,KER11,KER12,DOR12,FRI11,MER11,ROM12,SFK11,TEX11,TEX12,WDU11,WDU12,RMV12,WAG12|QK12,YUN12,DOR11,FRI12,MER11,MER12,ROM11,SFK12,CHA11,CHA12,RMV11,WAG11
1	88721202	88721387	PIFO(dist=23146),LOC101113807(dist=59527)	intergenic	NA	185|247	s8302,s8303,s8304|s8302,s402740,s8304	b1_1_88721202|b2_1_88721202	-	Reference,KAZ11,KAZ12,QK11,QK12,WZM11,WZM12,YUN11,YUN12,KER11,KER12,DOR11,FRI11,FRI12,ROM11,ROM12,SFK11,TEX11,TEX12,CHA11,CHA12,RMV11,RMV12,WAG11,WAG12|DOR12,MER11,MER12,SFK12,WDU11,WDU12
1	88768144	88769787	PIFO(dist=70088),LOC101113807(dist=11127)	intergenic	NA	1643|1591	s8304,s8305,s8306|s8304,s296423,s8306	b1_1_88768144|b2_1_88768144	-	Reference,QK12,WZM11,YUN11,YUN12,KER11,DOR11,FRI12,MER11,MER12,ROM11,WDU11,WDU12,RMV11|KAZ11,KAZ12,QK11,WZM12,KER12,DOR12,FRI11,MER11,ROM12,SFK11,SFK12,TEX11,TEX12,CHA11,CHA12,RMV12,WAG11,WAG12
1	88772305	88774249	PIFO(dist=74249),LOC101113807(dist=6665)	intergenic	NA	1944|5217	s8306,s8307,s8308|s8306,s296422,s8308	b1_1_88772305|b2_1_88772305	-	Reference,QK12,WZM11,YUN11,YUN12,KER11,DOR11,FRI12,MER11,MER12,ROM11,WDU11,WDU12,RMV11|KAZ11,KAZ12,QK11,WZM12,KER12,DOR12,FRI11,MER11,ROM12,SFK11,SFK12,TEX11,TEX12,CHA11,CHA12,RMV12,WAG11,WAG12
1	90859680	90860051	MAGI3	intronic	NA	371|2199	s8426,s8427,s8428|s8426,s372750,s8428	b1_1_90859680|b2_1_90859680	-	Reference,KAZ11,KAZ12,QK11,QK12,YUN11,YUN12,KER11,KER12,DOR11,DOR12,FRI11,FRI12,MER11,MER12,ROM11,ROM12,SFK12,TEX11,TEX12,CHA11,CHA12,WDU11,WDU12,RMV11,WAG11,WAG12|WZM11,WZM12,SFK11,RMV12
1	95742299	95742462	SPAG17(dist=80886),TBX15(dist=683523)	intergenic	NA	163|2401	s8716,s8717,s8718|s8716,s358305,s8718	b1_1_95742299|b2_1_95742299	-	Reference,KAZ11,KAZ12,QK11,QK12,WZM11,WZM12,YUN11,YUN12,KER11,KER12,DOR11,DOR12,FRI11,FRI12,MER11,MER12,ROM11,ROM12,SFK11,SFK12,TEX11,TEX12,CHA11,CHA12,WDU11,WDU12,RMV11,RMV12,WAG12|WAG11
1	95985058	95985910	SPAG17(dist=323645),TBX15(dist=440075)	intergenic	NA	852|1538	s8732,s8733,s8734|s8732,s300097,s8734	b1_1_95985058|b2_1_95985058	-	Reference,YUN11,KER11,FRI11,MER11,MER12,SFK11,CHA11,WDU11|KAZ11,KAZ12,QK11,QK12,WZM11,WZM12,YUN12,KER12,DOR11,DOR12,FRI12,ROM11,ROM12,SFK12,TEX11,TEX12,CHA12,WDU12,RMV11,RMV12,WAG11,WAG12
1	96119974	96120131	SPAG17(dist=458561),TBX15(dist=305854)	intergenic	NA	157|554	s8744,s8745,s8746,s8747|s8744,s346853,s8747	b1_1_96119974|b2_1_96119974	-	Reference,KAZ12,QK11,WZM11,WZM12,YUN11,YUN12,KER11,KER12,DOR11,DOR12,MER11,MER12,ROM11,ROM12,SFK11,SFK12,CHA11,CHA12,WDU11,WDU12,RMV11,RMV12,WAG11,WAG12|QK12,FRI11,FRI12,TEX11,TEX12
1	96190382	96191651	SPAG17(dist=528969),TBX15(dist=234334)	intergenic	NA	1269|1741	s8759,s8760,s8761|s8759,s346850,s8761	b1_1_96190382|b2_1_96190382	-	Reference,KAZ11,KAZ12,QK11,WZM11,WZM12,YUN11,YUN12,KER11,KER12,DOR11,DOR12,FRI12,MER11,MER12,ROM11,ROM12,SFK11,SFK12,TEX11,TEX12,CHA11,CHA12,WDU12,RMV12,WAG11,WAG12|QK12,FRI11,RMV11
1	96848819	96849608	WARS2(dist=166952),HAO2(dist=61209)	intergenic	NA	789|332	s8807,s8808,s8809|s8807,s300083,s8809	b1_1_96848819|b2_1_96848819	-	Reference,YUN11,YUN12,FRI11,FRI12,MER11,CHA12,RMV11,RMV12,WAG12|KAZ11,KAZ12,QK11,QK12,WZM11,WZM12,KER11,KER12,DOR11,DOR12,MER12,ROM11,ROM12,SFK11,SFK12,TEX11,TEX12,CHA11,WDU11,WDU12,WAG11
1	97710121	97710228	LOC101112864	intronic	NA	107|227	s8865,s8866,s8867|s8865,s300079,s8867	b1_1_97710121|b2_1_97710121	-	Reference,YUN11,KER11,MER12,TEX11,CHA11,CHA12,WDU11|KAZ11,KAZ12,QK11,QK12,WZM11,WZM12,YUN12,KER12,DOR11,DOR12,FRI11,FRI12,MER11,ROM11,ROM12,SFK11,SFK12,TEX12,WDU12,RMV11,RMV12,WAG11,WAG12
1	98366386	98366525	CHD1L(dist=45607),LOC101113455(dist=82040)	intergenic	NA	139|261	s8905,s8906,s8907|s8905,s318908,s8907	b1_1_98366386|b2_1_98366386	-	Reference,KAZ11,QK11,QK12,WZM11,YUN12,KER11,KER12,DOR12,MER12,SFK11,SFK12,TEX11,TEX12,CHA11,CHA12,WDU12,RMV12,WAG11,WAG12|KAZ12,WZM12,YUN11,DOR11,FRI11,FRI12,MER11,ROM11,ROM12,WDU11,RMV11
1	98576841	98576988	LOC101113720(dist=87890),BCL9(dist=17871)	intergenic	NA	147|481	s8929,s8930,s8931|s8929,s318912,s8931	b1_1_98576841|b2_1_98576841	-	Reference,KAZ11,QK11,QK12,WZM12,YUN11,YUN12,KER11,DOR11,DOR12,FRI11,FRI12,MER11,ROM11,ROM12,SFK11,SFK12,TEX12,CHA11,WDU11,WDU12,RMV11,RMV12,WAG11,WAG12|KAZ12,WZM11,KER12,MER12,TEX11,CHA12
1	99373873	99373991	TRNAN-GUU(dist=17717),TRNAN-GUU(dist=3715)	intergenic	NA	118|118	s8974,s8975,s8976|s8974,s402747,s8976	b1_1_99373873|b2_1_99373873	-	Reference,KAZ11,KAZ12,QK11,WZM11,WZM12,YUN11,YUN12,KER11,DOR11,FRI11,FRI12,MER11,MER12,ROM11,ROM12,SFK11,SFK12,TEX12,CHA12,WDU12,RMV11,RMV12,WAG11,WAG12|DOR12
1	99515912	99516378	TRNAG-CCC	ncRNA_exonic	NA	466|518	s8989,s8990,s8991,s8992,s8993,s8994|s8989,s8990,s350760,s8993,s8994	b1_1_99515912|b2_1_99515912	-	Reference,KAZ11,SFK12,TEX11,CHA12|KER12
1	99533773	99533965	TRNAN-GUU(dist=6053),TRNAV-AAC(dist=19828)	intergenic	NA	192|192	s8995,s8996,s8997|s8995,s427710,s8997	b1_1_99533773|b2_1_99533773	-	Reference,KAZ11,KAZ12,QK11,QK12,WZM11,WZM12,YUN11,YUN12,KER11,KER12,DOR11,DOR12,FRI11,FRI12,MER12,ROM11,SFK11,SFK12,TEX11,CHA11,CHA12,WDU11,WDU12,RMV11,WAG11,WAG12|ROM12
1	100283387	100283554	PLEKHO1(dist=38952),ANP32E(dist=15108)	intergenic	NA	167|245	s9046,s9047,s9048|s9046,s312113,s9048	b1_1_100283387|b2_1_100283387	-	Reference,KAZ11,QK11,WZM12,YUN12,KER11,KER12,DOR11,MER12,TEX11,TEX12,CHA11,WDU11|KAZ12,QK12,WZM11,YUN11,DOR12,FRI11,FRI12,MER11,ROM11,ROM12,SFK11,SFK12,CHA12,WDU12,RMV11,RMV12,WAG11,WAG12
1	100702763	100702864	HORMAD1	upstream	NA	101|247	s9068,s9069,s9070|s9068,s436260,s9070	b1_1_100702763|b2_1_100702763	-	Reference,KAZ11,KAZ12,QK11,QK12,WZM11,WZM12,YUN11,YUN12,KER11,KER12,DOR11,DOR12,FRI11,FRI12,MER11,MER12,ROM11,ROM12,SFK11,SFK12,TEX11,TEX12,CHA12,WDU11,WDU12,RMV11,RMV12,WAG11,WAG12|CHA11
1	101456811	101457183	CGN	intronic	NA	372|547	s9099,s9100,s9101|s9099,s395830,s9101	b1_1_101456811|b2_1_101456811	-	Reference,KAZ11,KAZ12,QK11,QK12,WZM11,WZM12,YUN11,YUN12,KER11,DOR11,FRI12,MER11,MER12,ROM11,TEX11,TEX12,CHA11,CHA12,WDU11,WDU12,RMV11,RMV12,WAG11,WAG12|KER12,DOR12,FRI11,ROM12,SFK11,SFK12
1	101547489	101547665	SNX27	intronic	NA	176|195	s9103,s9104,s9105|s9103,s433504,s9105	b1_1_101547489|b2_1_101547489	-	Reference,KAZ11,KAZ12,QK11,QK12,WZM11,WZM12,YUN11,YUN12,KER11,KER12,DOR11,DOR12,FRI11,FRI12,MER11,MER12,ROM11,ROM12,SFK11,SFK12,TEX12,CHA11,CHA12,WDU11,WDU12,RMV11,RMV12,WAG11,WAG12|TEX11
1	101942780	101947361	THEM4(dist=68166),S100A10(dist=10421)	intergenic	NA	4581|2126	s9129,s9130,s9131|s9129,s294882,s9131	b1_1_101942780|b2_1_101942780	-	Reference,KAZ12,QK11,WZM11,YUN11,KER11,DOR12,FRI11,MER11,ROM11,SFK11,SFK12,TEX11,WDU12,RMV11,RMV12,WAG11,WAG12|KAZ11,QK12,WZM12,YUN12,KER12,DOR11,FRI12,MER12,ROM12,TEX12,CHA11,CHA12,WDU11
1	101951016	101951201	THEM4(dist=76402),S100A10(dist=6581)	intergenic	NA	185|450	s9135,s9136,s9137|s9135,s294879,s9137	b1_1_101951016|b2_1_101951016	-	Reference,KAZ12,QK11,WZM11,YUN11,KER11,DOR12,FRI11,MER11,ROM11,SFK11,SFK12,TEX11,WDU12,RMV11,RMV12,WAG11,WAG12|KAZ11,QK12,WZM12,YUN12,KER12,DOR11,FRI12,MER12,ROM12,TEX12,CHA11,CHA12,WDU11
1	102155686	102155875	LOC101120969	exonic	NA	189|261	s9164,s9165,s9166,s9167,s9168|s9164,s9165,s294877,s9167,s9168	b1_1_102155686|b2_1_102155686	-	Reference|KAZ11,FRI12,MER12,CHA11,RMV11,RMV12
1	102321223	102321760	FLG,LOC105614079	exonic	NA	537|394	s9203,s9204,s9205|s9203,s431115,s9205	b1_1_102321223|b2_1_102321223	-	Reference,KAZ11,KAZ12,QK11,QK12,WZM11,WZM12,YUN11,YUN12,KER11,KER12,DOR11,DOR12,FRI11,FRI12,MER11,MER12,ROM11,ROM12,SFK11,TEX11,TEX12,CHA11,CHA12,WDU11,WDU12,RMV11,RMV12,WAG11,WAG12|SFK12
1	102481925	102482419	CRNN(dist=34261),LOC114113200(dist=106840)	intergenic	NA	494|200	s9242,s9243,s9244,s9245,s9246|s9242,s436265,s9246	b1_1_102481925|b2_1_102481925	-	Reference,KAZ11,KAZ12,QK12,WZM12,YUN11,YUN12,KER11,MER11,MER12,ROM11,SFK11,SFK12,CHA12,WDU11,WDU12,RMV11,RMV12,WAG11,WAG12|CHA11
1	102566856	102567120	CRNN(dist=119192),LOC114113200(dist=22139)	intergenic	NA	264|659	s9266,s9267,s9268|s9266,s368062,s9268	b1_1_102566856|b2_1_102566856	-	Reference,KAZ11,KAZ12,QK11,QK12,WZM11,WZM12,YUN11,YUN12,KER11,KER12,DOR11,DOR12,FRI12,MER11,MER12,ROM11,ROM12,SFK11,SFK12,TEX12,CHA11,WDU11,WDU12,WAG11|FRI11,CHA12,RMV11,RMV12,WAG12
1	102752015	102752511	LOC105605549(dist=6371),LOC121818619(dist=8513)	intergenic	NA	496|112	s9289,s9290,s9291|s9289,s312131,s9291	b1_1_102752015|b2_1_102752015	-	Reference,KAZ11,QK12,WZM11,WZM12,YUN12,KER11,KER12,DOR11,DOR12,FRI12,MER11,ROM11,SFK11,SFK12,TEX11,TEX12,CHA11,CHA12,WDU11,WDU12,RMV11,RMV12,WAG12|KAZ12,QK11,YUN11,FRI11,MER12,ROM12,WAG11
1	102770208	102772556	LOC121818619(dist=8882),LOC101122647(dist=40167)	intergenic	NA	2348|13956	s9296,s9297,s9298|s9296,s336550,s9298	b1_1_102770208|b2_1_102770208	-	Reference,KAZ11,KAZ12,QK12,WZM11,WZM12,YUN12,KER11,KER12,DOR11,DOR12,FRI11,FRI12,MER11,MER12,ROM11,ROM12,SFK11,SFK12,TEX11,TEX12,CHA11,CHA12,WDU11,WDU12,RMV11,RMV12,WAG12|QK11,YUN11,WAG11
1	102821461	102822995	LOC101122647(dist=8099),LOC101123167(dist=35077)	intergenic	NA	1534|7357	s9305,s9306,s9307|s9305,s294856,s9307	b1_1_102821461|b2_1_102821461	-	Reference,KAZ12,QK11,WZM11,WZM12,YUN11,YUN12,KER12,DOR11,DOR12,FRI11,FRI12,MER11,MER12,ROM11,ROM12,SFK11,SFK12,TEX11,TEX12,CHA11,CHA12,WDU11,WDU12,RMV11,RMV12,WAG11,WAG12|KAZ11,QK12,KER11
1	102934270	102934429	IVL(dist=45457),SPRR4(dist=27162)	intergenic	NA	159|157	s9317,s9318,s9319|s9317,s357734,s9319	b1_1_102934270|b2_1_102934270	-	Reference,KAZ11,KAZ12,QK11,QK12,WZM11,WZM12,YUN11,YUN12,KER11,KER12,DOR11,DOR12,FRI11,FRI12,MER11,MER12,ROM11,ROM12,SFK11,SFK12,TEX11,TEX12,CHA11,CHA12,WDU11,WDU12,RMV11,RMV12,WAG12|WAG11
1	102942228	102942586	IVL(dist=53415),SPRR4(dist=19005)	intergenic	NA	358|457	s9323,s9324,s9325|s9323,s368061,s9325	b1_1_102942228|b2_1_102942228	-	Reference,KAZ11,KAZ12,QK11,QK12,WZM11,WZM12,YUN11,YUN12,KER11,DOR11,DOR12,FRI11,FRI12,MER11,ROM11,ROM12,SFK11,SFK12,TEX11,TEX12,CHA11,CHA12,WDU11,WDU12,RMV11,RMV12,WAG11|KER12,MER12,WAG12
1	103109076	103109251	LOC443313(dist=45577),LOC101121654(dist=120911)	intergenic	NA	175|647	s9372,s9373,s9374|s9372,s294840,s9374	b1_1_103109076|b2_1_103109076	-	Reference|KAZ11,KAZ12,QK11,QK12,WZM11,WZM12,YUN11,YUN12,KER11,KER12,DOR11,DOR12,FRI11,FRI12,MER11,MER12,ROM11,ROM12,SFK11,SFK12,TEX11,TEX12,CHA11,CHA12,WDU11,WDU12,RMV11,RMV12,WAG11,WAG12
1	103109644	103109777	LOC443313(dist=46145),LOC101121654(dist=120385)	intergenic	NA	133|466	s9378,s9379,s9380|s9378,s294837,s9380	b1_1_103109644|b2_1_103109644	-	Reference|KAZ11,KAZ12,QK11,QK12,WZM11,WZM12,YUN11,YUN12,KER11,KER12,DOR11,DOR12,FRI11,FRI12,MER11,MER12,ROM11,ROM12,SFK11,SFK12,TEX11,TEX12,CHA11,CHA12,WDU11,WDU12,RMV11,RMV12,WAG11,WAG12
1	103164606	103164843	LOC443313(dist=101107),LOC101121654(dist=65319)	intergenic	NA	237|169	s9387,s9388,s9389|s9387,s349467,s9389	b1_1_103164606|b2_1_103164606	-	Reference,KAZ11,KAZ12,QK11,WZM11,WZM12,YUN11,YUN12,KER11,DOR11,FRI12,MER11,MER12,ROM11,ROM12,SFK11,SFK12,TEX11,TEX12,CHA11,CHA12,WDU11,WDU12,RMV11,RMV12,WAG11,WAG12|QK12,KER12,DOR12,FRI11
1	103403500	103408383	PRD-SPRRII(dist=31307),LELP1(dist=189578)	intergenic	NA	4883|4886	s9432,s9433,s9434|s9432,s357731,s9434	b1_1_103403500|b2_1_103403500	-	Reference,KAZ11,KAZ12,QK11,QK12,WZM11,WZM12,YUN12,KER11,DOR11,DOR12,FRI11,FRI12,MER11,MER12,ROM11,ROM12,SFK11,SFK12,TEX11,TEX12,CHA11,CHA12,WDU11,WDU12,WAG12|YUN11,KER11,KER12,RMV11,RMV12,WAG11
1	103452979	103453472	PRD-SPRRII(dist=80786),LELP1(dist=144489)	intergenic	NA	493|747	s9436,s9437,s9438|s9436,s395894,s9438	b1_1_103452979|b2_1_103452979	-	Reference,KAZ11,KAZ12,QK11,QK12,WZM11,WZM12,YUN11,YUN12,KER11,DOR11,DOR12,FRI11,FRI12,MER11,MER12,ROM11,ROM12,SFK11,SFK12,TEX11,TEX12,CHA11,CHA12,WDU11,WDU12,RMV11,RMV12,WAG11,WAG12|KER11,KER12
1	103495883	103496475	PRD-SPRRII(dist=123690),LELP1(dist=101486)	intergenic	NA	592|354	s9452,s9453,s9454|s9452,s357728,s9454	b1_1_103495883|b2_1_103495883	-	Reference,KAZ11,KAZ12,QK11,QK12,WZM11,WZM12,YUN11,YUN12,KER11,DOR11,DOR12,FRI11,FRI12,MER11,MER12,ROM11,ROM12,SFK11,SFK12,TEX11,TEX12,CHA11,CHA12,WDU11,WDU12,RMV11,RMV12,WAG12|KER12,WAG11
1	103505273	103507007	PRD-SPRRII(dist=133080),LELP1(dist=90954)	intergenic	NA	1734|1637	s9454,s9455,s9456|s9454,s357727,s9456	b1_1_103505273|b2_1_103505273	-	Reference,KAZ11,KAZ12,QK11,QK12,WZM11,WZM12,YUN11,YUN12,KER11,DOR11,DOR12,FRI11,FRI12,MER12,ROM11,ROM12,SFK11,SFK12,TEX11,TEX12,CHA11,CHA12,RMV11,RMV12,WAG12|KER12,MER11,WDU11,WDU12,WAG11
1	103520672	103521009	PRD-SPRRII(dist=148479),LELP1(dist=76952)	intergenic	NA	337|655	s9461,s9462,s9463|s9461,s357726,s9463	b1_1_103520672|b2_1_103520672	-	Reference,KAZ11,KAZ12,QK11,QK12,WZM12,YUN11,YUN12,KER11,DOR12,FRI11,FRI12,MER11,MER12,ROM11,ROM12,SFK11,SFK12,TEX11,CHA11,CHA12,WDU11,WDU12,RMV11,RMV12,WAG12|WZM11,KER12,DOR11,TEX12,WAG11
1	103539754	103539885	PRD-SPRRII(dist=167561),LELP1(dist=58076)	intergenic	NA	131|1030	s9471,s9472,s9473|s9471,s312148,s9473	b1_1_103539754|b2_1_103539754	-	Reference,KAZ11,WZM11,WZM12,YUN11,KER12,DOR11,DOR12,FRI11,FRI12,MER12,ROM11,ROM12,SFK11,SFK12,TEX11,TEX12,CHA12,RMV11,RMV12,WAG12|KAZ12,QK11,QK12,YUN12,KER11,MER11,CHA11,WDU11,WDU12,WAG11
1	104039277	104039428	S100A2(dist=19591),S100A16(dist=10724)	intergenic	NA	151|111	s9520,s9521,s9522|s9520,s312153,s9522	b1_1_104039277|b2_1_104039277	-	Reference,KAZ11,QK11,WZM11,YUN12,KER11,KER12,DOR11,FRI11,FRI12,MER12,ROM11,ROM12,SFK11,SFK12,TEX11,TEX12,CHA11,CHA12,WDU11,WDU12,WAG11,WAG12|KAZ12,QK12,WZM12,YUN11,DOR12,MER11,RMV11,RMV12
1	105481997	105483112	PKLR(dist=13173),FDPS(dist=1858)	intergenic	NA	1115|868	s9589,s9590,s9591|s9589,s323899,s9591	b1_1_105481997|b2_1_105481997	-	Reference,KAZ11,DOR11,DOR12,MER11,MER12,ROM11,ROM12,TEX12,CHA11,CHA12,WAG11|KAZ12,QK11,QK12,WZM11,WZM12,YUN11,YUN12,KER11,KER12,FRI11,FRI12,SFK11,SFK12,WDU11,WDU12,RMV11,RMV12,WAG12
1	105871266	105874734	YY1AP1	exonic	NA	3468|3342	s9615,s9616,s9617|s9615,s387234,s9617	b1_1_105871266|b2_1_105871266	-	Reference,KAZ11,KAZ12,QK11,QK12,WZM11,WZM12,YUN11,KER11,KER12,DOR11,DOR12,FRI11,FRI12,MER11,MER12,ROM11,ROM12,SFK11,SFK12,CHA11,CHA12,WDU11,WDU12,RMV11,RMV12,WAG11,WAG12|YUN12,TEX12
1	107184800	107185016	LOC121820608(dist=18542),LOC121820610(dist=60237)	intergenic	NA	216|217	s9685,s9686,s9687|s9685,s390039,s9687	b1_1_107184800|b2_1_107184800	-	Reference,KAZ11,KAZ12,QK11,QK12,WZM11,WZM12,YUN11,KER12,DOR11,DOR12,FRI11,FRI12,MER11,MER12,ROM11,ROM12,SFK11,SFK12,TEX11,TEX12,CHA11,CHA12,WDU11,WDU12,RMV11,RMV12,WAG11,WAG12|KER11
1	107259692	107261500	LOC121820610	intronic	NA	1808|3691	s9702,s9703,s9704|s9702,s297501,s9704	b1_1_107259692|b2_1_107259692	-	Reference,QK12,WZM11,WZM12,KER12,DOR11,DOR12,MER12,ROM11,SFK12,WAG11|KAZ11,KAZ12,QK11,YUN11,KER11,FRI11,MER11,ROM12,SFK11,TEX11,TEX12,CHA11,CHA12,WDU11,WDU12,RMV11,RMV12,WAG12
1	107264023	107264709	LOC121820610	intronic	NA	686|341	s9704,s9705,s9706|s9704,s297502,s9706	b1_1_107264023|b2_1_107264023	-	Reference,QK12,WZM11,WZM12,KER12,DOR11,DOR12,MER12,ROM11,SFK12,WAG11|KAZ11,KAZ12,QK11,YUN11,KER11,FRI11,MER11,ROM12,SFK11,TEX11,TEX12,CHA11,CHA12,WDU11,WDU12,RMV11,RMV12,WAG12
1	107266162	107266692	LOC121820610	intronic	NA	530|1245	s9706,s9707,s9708|s9706,s297503,s9708	b1_1_107266162|b2_1_107266162	-	Reference,QK12,WZM11,WZM12,KER12,DOR11,DOR12,MER12,ROM11,SFK12,WAG11|KAZ11,KAZ12,QK11,YUN11,KER11,FRI11,MER11,ROM12,SFK11,TEX11,TEX12,CHA11,CHA12,WDU11,WDU12,RMV11,RMV12,WAG12
1	107268298	107268744	LOC121820610	intronic	NA	446|2400	s9708,s9709,s9710|s9708,s297504,s9710	b1_1_107268298|b2_1_107268298	-	Reference,QK12,WZM11,WZM12,KER12,DOR11,DOR12,MER12,ROM11,SFK12,WAG11|KAZ11,KAZ12,QK11,YUN11,KER11,FRI11,MER11,ROM12,SFK11,TEX11,TEX12,CHA11,CHA12,WDU11,WDU12,RMV11,RMV12,WAG12
1	107308324	107308665	LOC101119835(dist=8849),LOC121820612(dist=15963)	intergenic	NA	341|4216	s9722,s9723,s9724|s9722,s297507,s9724	b1_1_107308324|b2_1_107308324	-	Reference,KER12,DOR11,DOR12|KAZ11,KAZ12,QK11,QK12,WZM11,WZM12,YUN11,KER11,FRI11,MER11,MER12,ROM11,ROM12,SFK11,SFK12,TEX11,TEX12,CHA11,CHA12,WDU11,WDU12,RMV11,RMV12,WAG11,WAG12
1	107321788	107322156	LOC101119835(dist=22313),LOC121820612(dist=2472)	intergenic	NA	368|317	s9724,s9725,s9726|s9724,s416114,s9726	b1_1_107321788|b2_1_107321788	-	Reference,KAZ11,KAZ12,QK11,QK12,WZM11,WZM12,YUN11,YUN12,KER11,KER12,DOR11,DOR12,FRI11,MER11,ROM12,SFK11,SFK12,TEX11,TEX12,CHA11,CHA12,WDU11,WDU12,RMV11,RMV12,WAG11,WAG12|MER12,ROM11
1	107370529	107371437	LOC121820612(dist=34618),LOC121818623(dist=68621)	intergenic	NA	908|2480	s9731,s9732,s9733|s9731,s400284,s9733	b1_1_107370529|b2_1_107370529	-	Reference,KAZ11,KAZ12,QK11,QK12,WZM11,WZM12,YUN11,YUN12,KER11,KER12,DOR12,FRI11,MER11,MER12,ROM11,ROM12,SFK11,SFK12,TEX11,TEX12,CHA11,CHA12,WDU11,WDU12,RMV11,RMV12,WAG11,WAG12|DOR11
1	107455690	107456664	LOC121818623	intronic	NA	974|852	s9744,s9745,s9746|s9744,s346913,s9746	b1_1_107455690|b2_1_107455690	-	Reference,KAZ11,KAZ12,QK11,WZM11,WZM12,YUN12,KER12,DOR11,FRI11,MER11,MER12,ROM12,SFK11,TEX12,CHA11,WDU11,WDU12,RMV11,RMV12,WAG11,WAG12|QK12,YUN11,KER11,DOR12,ROM11,SFK12,TEX11,CHA12
1	107483778	107484368	LOC121818623(dist=25870),LOC121820615(dist=36866)	intergenic	NA	590|4253	s9755,s9756,s9757|s9755,s321695,s9757	b1_1_107483778|b2_1_107483778	-	Reference,KAZ11,QK11,WZM11,WZM12,YUN12,KER12,DOR11,DOR12,MER12,ROM11,SFK11,SFK12,TEX11,CHA12,WDU11,WDU12,WAG11,WAG12|KAZ12,QK12,YUN11,KER11,FRI11,MER11,ROM12,TEX12,CHA11,RMV11,RMV12
1	107722797	107723005	LOC101111854(dist=4764),LOC101112109(dist=21902)	intergenic	NA	208|543	s9767,s9768,s9769|s9767,s357713,s9769	b1_1_107722797|b2_1_107722797	-	Reference,KAZ11,KAZ12,QK11,QK12,WZM11,KER11,KER12,FRI11,FRI12,MER11,MER12,SFK12,TEX11,TEX12,CHA11,CHA12,WDU11,WAG12|WZM12,YUN11,YUN12,DOR11,DOR12,ROM11,ROM12,SFK11,RMV11,RMV12,WAG11
1	108077112	108078463	FCRL3	intronic	NA	1351|393	s9790,s9791,s9792|s9790,s383005,s9792	b1_1_108077112|b2_1_108077112	-	Reference,KAZ11,KAZ12,QK11,QK12,WZM11,WZM12,YUN12,KER11,KER12,DOR11,DOR12,FRI11,FRI12,MER11,ROM11,ROM12,SFK11,SFK12,TEX11,TEX12,CHA12,WDU11,WDU12,RMV11,RMV12,WAG11,WAG12|YUN11,MER12,CHA11
1	108085099	108085606	FCRL3(dist=5166),TRNAC-ACA(dist=6291)	intergenic	XP_042100876.1 endogenous retrovirus group K member 9 Env polyprotein-like [Ovis aries]	507|8459	s9792,s9793,s9794|s9792,s373095,s9794	b1_1_108085099|b2_1_108085099	LOC121818830	Reference,KAZ11,KAZ12,QK11,QK12,WZM12,YUN11,YUN12,KER11,KER12,DOR11,DOR12,FRI11,FRI12,MER11,MER12,ROM11,ROM12,SFK11,SFK12,TEX12,CHA11,WDU11,WDU12,RMV11,RMV12,WAG11,WAG12|WZM11,TEX11,CHA12
1	108131633	108132518	FCRL1(dist=8667),LOC101109313(dist=21028)	intergenic	NA	885|120	s9800,s9801,s9802|s9800,s424465,s9802	b1_1_108131633|b2_1_108131633	-	Reference,KAZ11,KAZ12,QK11,QK12,WZM11,WZM12,YUN11,YUN12,KER11,KER12,DOR11,DOR12,FRI11,FRI12,MER11,MER12,ROM12,SFK11,TEX12,CHA11,CHA12,WDU11,RMV11,RMV12,WAG11,WAG12|ROM11,SFK12,TEX11,WDU12
1	108628801	108630626	LOC101110103(dist=4018),LOC443442(dist=77486)	intergenic	NA	1825|1297	s9827,s9828,s9829|s9827,s346908,s9829	b1_1_108628801|b2_1_108628801	-	Reference,KAZ11,KAZ12,QK11,WZM11,YUN11,YUN12,KER11,KER12,DOR11,DOR12,FRI11,FRI12,MER11,ROM11,ROM12,SFK11,SFK12,TEX12,CHA11,WDU11,WDU12,RMV11,RMV12,WAG11|QK12,WZM12,MER12,TEX11,CHA12
1	108643786	108643968	LOC101110103(dist=19003),LOC443442(dist=64144)	intergenic	NA	182|147	s9829,s9830,s9831|s9829,s346907,s9831	b1_1_108643786|b2_1_108643786	-	Reference,KAZ11,KAZ12,QK11,WZM11,YUN11,YUN12,KER11,KER12,DOR11,DOR12,FRI11,FRI12,MER11,ROM11,ROM12,SFK11,SFK12,TEX12,CHA11,WDU11,WDU12,RMV11,RMV12,WAG11|QK12,WZM12,MER12,TEX11,CHA12
1	108649003	108649106	LOC101110103(dist=24220),LOC443442(dist=59006)	intergenic	NA	103|152	s9833,s9834,s9835|s9833,s438416,s9835	b1_1_108649003|b2_1_108649003	-	Reference,KAZ11,KAZ12,QK11,QK12,WZM11,WZM12,YUN11,YUN12,KER11,KER12,DOR11,DOR12,FRI11,FRI12,MER11,MER12,ROM11,ROM12,SFK11,SFK12,TEX11,TEX12,CHA11,WDU11,WDU12,RMV11,RMV12,WAG11|CHA12
1	109337043	109337201	LOC101111923(dist=25490),LOC101117724(dist=56260)	intergenic	NA	158|480	s9921,s9922,s9923|s9921,s410914,s9923	b1_1_109337043|b2_1_109337043	-	Reference,KAZ11,KAZ12,QK11,QK12,WZM11,WZM12,YUN12,KER11,KER12,DOR11,DOR12,FRI11,MER11,MER12,ROM11,ROM12,SFK11,SFK12,TEX11,TEX12,CHA11,CHA12,WDU12,RMV11,RMV12,WAG11,WAG12|FRI12,WDU11
1	109358344	109358609	LOC101111923(dist=46791),LOC101117724(dist=34852)	intergenic	NA	265|264	s9924,s9925,s9926|s9924,s297525,s9926	b1_1_109358344|b2_1_109358344	-	Reference,QK12,WZM11,YUN12,DOR11,MER12,ROM11,SFK11,TEX11,WDU12,RMV11,RMV12,WAG11,WAG12|KAZ11,KAZ12,QK11,WZM12,KER11,KER12,DOR12,FRI11,FRI12,MER11,ROM12,SFK12,TEX12,CHA11,CHA12,WDU11
1	109457394	109457643	LOC101112179(dist=39349),LOC101118497(dist=66225)	intergenic	NA	249|265	s9949,s9950,s9951|s9949,s385085,s9951	b1_1_109457394|b2_1_109457394	-	Reference,KAZ11,KAZ12,WZM12,YUN12,KER12,FRI11,FRI12,MER11,SFK12,TEX11,CHA11,CHA12,WDU11,WDU12,WAG11|QK11,QK12,WZM11,YUN11,KER11,DOR11,DOR12,MER12,ROM11,ROM12,SFK11,TEX12,RMV11,RMV12,WAG12
1	109520628	109520739	LOC101112179(dist=102583),LOC101118497(dist=3129)	intergenic	NA	111|380	s9973,s9974,s9975|s9973,s321678,s9975	b1_1_109520628|b2_1_109520628	-	Reference,KAZ11,QK11,QK12,WZM11,YUN11,YUN12,KER11,DOR11,DOR12,MER11,ROM11,ROM12,TEX12,CHA11,CHA12,WDU11,RMV11,RMV12,WAG12|KAZ12,WZM12,KER12,FRI11,FRI12,MER12,SFK11,SFK12,TEX11,WDU12,WAG11
1	109568287	109568509	LOC101112436(dist=5379),SPTA1(dist=1727)	intergenic	NA	222|1794	s9981,s9982,s9983|s9981,s321677,s9983	b1_1_109568287|b2_1_109568287	-	Reference,KAZ11,QK11,QK12,WZM12,YUN11,YUN12,KER11,KER12,DOR11,DOR12,FRI11,FRI12,MER11,MER12,ROM11,ROM12,SFK11,SFK12,TEX12,CHA12,WDU11,WDU12,RMV11,RMV12,WAG11,WAG12|KAZ12,WZM11,TEX11,CHA11
1	109913168	109913271	LOC121818640	intronic	NA	103|455	s10043,s10044,s10045|s10043,s297541,s10045	b1_1_109913168|b2_1_109913168	-	Reference,KAZ12,QK11,WZM11,WZM12,KER11,DOR12,FRI11,FRI12,MER12,ROM12,SFK11,SFK12,TEX11,TEX12,CHA12,WDU11,WDU12,WAG11,WAG12|KAZ11,QK12,YUN11,YUN12,KER12,DOR11,MER11,ROM11,CHA11,RMV11,RMV12
1	110065263	110065393	LOC101112936(dist=60926),TRNAR-UCU(dist=25347)	intergenic	NA	130|1091	s10059,s10060,s10061|s10059,s321674,s10061	b1_1_110065263|b2_1_110065263	-	Reference,KAZ11,KER11|KAZ12,QK11,QK12,WZM11,WZM12,YUN11,YUN12,KER12,DOR11,DOR12,FRI11,FRI12,MER11,MER12,ROM11,ROM12,SFK11,SFK12,TEX11,TEX12,CHA11,CHA12,WDU11,WDU12,RMV11,RMV12,WAG11,WAG12
1	110149803	110149934	CADM3	intronic	NA	131|235	s10072,s10073,s10074|s10072,s336484,s10074	b1_1_110149803|b2_1_110149803	-	Reference,KAZ11,KAZ12,QK12,WZM11,WZM12,YUN11,YUN12,KER11,KER12,DOR11,DOR12,FRI12,MER11,MER12,ROM11,ROM12,SFK11,SFK12,TEX11,TEX12,CHA11,CHA12,WDU11,WDU12,RMV11,RMV12,WAG12|QK11,FRI11,WAG11
1	110183031	110183922	ACKR1(dist=27344),LOC101113715(dist=38778)	intergenic	NA	891|251	s10075,s10076,s10077|s10075,s297543,s10077	b1_1_110183031|b2_1_110183031	-	Reference|KAZ11,KAZ12,QK11,QK12,WZM11,WZM12,YUN11,YUN12,KER11,KER12,DOR11,DOR12,FRI11,FRI12,MER11,MER12,ROM11,ROM12,SFK11,SFK12,TEX11,TEX12,CHA11,CHA12,WDU11,WDU12,RMV11,RMV12,WAG11,WAG12
1	110661923	110663458	APCS(dist=102304),LOC114113241(dist=35669)	intergenic	NA	1535|1533	s10129,s10130,s10131|s10129,s346895,s10131	b1_1_110661923|b2_1_110661923	-	Reference,KAZ11,KAZ12,WZM11,WZM12,KER11,DOR12,MER11,ROM11,SFK11,SFK12,TEX11,CHA11,WDU12,RMV11,RMV12|QK11,YUN11,YUN12,KER12,DOR11,FRI11,FRI12,ROM12,WAG11,WAG12
1	111512221	111512338	NONE(dist=NONE),SLAMF6(dist=17916)	intergenic	NA	117|109	s10175,s10176,s10177|s10175,s385224,s10177	b1_1_111512221|b2_1_111512221	-	Reference,DOR11,DOR12,FRI11,FRI12,MER12,ROM12,SFK11,SFK12,TEX11,CHA12,WDU12|KAZ11,KAZ12,QK11,QK12,WZM11,WZM12,YUN11,YUN12,KER11,MER11,ROM11,TEX12,CHA11,WDU11,RMV11,RMV12,WAG11,WAG12
1	111636763	111636925	CD84(dist=3528),TRNAK-CUU(dist=40972)	intergenic	NA	162|224	s10184,s10185,s10186|s10184,s385226,s10186	b1_1_111636763|b2_1_111636763	-	Reference,KAZ11,KAZ12,QK11,QK12,WZM11,WZM12,YUN11,KER11,KER12,DOR11,DOR12,FRI11,FRI12,MER11,MER12,ROM11,ROM12,SFK11,SFK12,TEX11,TEX12,CHA11,CHA12,WDU11,WDU12,RMV11,RMV12,WAG11,WAG12|YUN12
1	111771108	111771592	SLAMF1(dist=20959),LOC114117625(dist=22040)	intergenic	XP_017904433.1 PREDICTED: endogenous retrovirus group K member 7 Env polyprotein-like [Capra hircus]|XP_027829421.2 endogenous retrovirus group K member 8 Gag polyprotein-like isoform X1 [Ovis aries]	484|9098	s10188,s10189,s10190|s10188,s357704,s10190	b1_1_111771108|b2_1_111771108	LOC108636081	Reference,KAZ11,KAZ12,QK11,QK12,WZM11,WZM12,YUN11,YUN12,KER12,DOR11,DOR12,FRI11,FRI12,MER11,MER12,ROM11,ROM12,SFK11,SFK12,TEX11,TEX12,CHA11,CHA12,WDU11,WDU12,RMV11,RMV12,WAG12|KER11,WAG11
1	112002903	112003580	LOC101103530(dist=5220),LOC101121646(dist=23374)	intergenic	NA	677|209	s10205,s10206,s10207|s10205,s346887,s10207	b1_1_112002903|b2_1_112002903	-	Reference,KAZ11,KAZ12,QK11,WZM11,WZM12,YUN11,YUN12,KER11,KER12,DOR11,DOR12,MER11,MER12,SFK11,SFK12,TEX11,CHA11,CHA12,WDU11,WDU12,RMV11,RMV12,WAG11,WAG12|QK12,FRI11,FRI12,ROM11,ROM12,TEX12
1	112025255	112025575	LOC101103530(dist=27572),LOC101121646(dist=1379)	intergenic	NA	320|235	s10207,s10208,s10209|s10207,s346886,s10209	b1_1_112025255|b2_1_112025255	-	Reference,KAZ11,KAZ12,QK11,WZM11,WZM12,YUN11,YUN12,KER11,KER12,DOR11,DOR12,FRI12,MER11,MER12,SFK11,SFK12,TEX11,TEX12,CHA11,CHA12,WDU11,WDU12,RMV11,RMV12,WAG11,WAG12|QK12,FRI11,ROM11,ROM12
1	112200276	112200587	CD244(dist=94808),LOC114113243(dist=17917)	intergenic	NA	311|592	s10221,s10222,s10223|s10221,s408167,s10223	b1_1_112200276|b2_1_112200276	-	Reference,KAZ11,KAZ12,QK11,QK12,WZM11,WZM12,YUN11,YUN12,KER11,KER12,DOR11,DOR12,FRI12,MER11,MER12,ROM11,ROM12,SFK11,SFK12,TEX11,TEX12,CHA11,CHA12,WDU11,WDU12,RMV11,WAG11,WAG12|FRI11,RMV12
1	112355859	112356235	LOC101122151	intronic	NA	376|296	s10230,s10231,s10232|s10230,s297558,s10232	b1_1_112355859|b2_1_112355859	-	Reference,KAZ12,QK12,WZM11,WZM12,YUN11,YUN12,KER11,DOR11,DOR12,FRI11,FRI12,MER11,ROM11,ROM12,SFK11,TEX12,CHA12,WDU11,WDU12,RMV11,RMV12,WAG11,WAG12|KAZ11,QK11,KER12,SFK12,TEX11,CHA11
1	112361870	112362075	LOC101122151	upstream	NA	205|203	s10232,s10233,s10234|s10232,s297559,s10234	b1_1_112361870|b2_1_112361870	-	Reference,KAZ12,QK12,WZM11,WZM12,YUN11,YUN12,KER11,DOR11,DOR12,FRI11,FRI12,MER11,ROM11,ROM12,SFK11,TEX12,CHA12,WDU11,WDU12,RMV11,RMV12,WAG11,WAG12|KAZ11,QK11,KER12,SFK12,TEX11,CHA11
1	112364863	112367318	LOC101122151(dist=3623),LOC100125357(dist=13141)	intergenic	NA	2455|3352	s10236,s10237,s10238|s10236,s297561,s10238	b1_1_112364863|b2_1_112364863	-	Reference,KAZ12,QK12,YUN11,KER11,DOR11,DOR12,FRI11,FRI12,MER11,ROM11,ROM12,SFK11,TEX12,CHA12,WDU11,WDU12,RMV11,RMV12,WAG12|KAZ11,QK11,WZM11,WZM12,YUN12,KER12,MER11,SFK12,TEX11,CHA11,WAG11
1	112368973	112369633	LOC101122151(dist=7733),LOC100125357(dist=10826)	intergenic	NA	660|4228	s10238,s10239,s10240|s10238,s357698,s10240	b1_1_112368973|b2_1_112368973	-	Reference,KAZ11,KAZ12,QK11,QK12,YUN11,KER11,KER12,DOR11,DOR12,FRI11,FRI12,MER11,ROM11,ROM12,SFK11,SFK12,TEX11,TEX12,CHA11,CHA12,WDU11,WDU12,RMV11,RMV12,WAG12|WZM11,WZM12,YUN12,MER11,WAG11
1	112385931	112386100	LOC100125357	intronic	NA	169|189	s10246,s10247,s10248|s10246,s297565,s10248	b1_1_112385931|b2_1_112385931	-	Reference,KAZ12,QK12,WZM11,WZM12,YUN11,YUN12,KER11,DOR11,DOR12,FRI11,FRI12,MER11,ROM11,ROM12,SFK11,TEX12,CHA12,WDU11,RMV11,RMV12,WAG11,WAG12|KAZ11,QK11,KER12,SFK12,TEX11,CHA11
1	113162816	113163724	ATF6	intronic	NA	908|858	s10311,s10312,s10313|s10311,s358099,s10313	b1_1_113162816|b2_1_113162816	-	Reference,KAZ11,KAZ12,QK11,QK12,WZM11,YUN11,KER12,DOR11,DOR12,MER11,SFK11,CHA11,WDU12,WAG12|WZM12,YUN12,KER11,FRI11,FRI12,MER12,ROM11,ROM12,SFK12,TEX11,TEX12,CHA12,WDU11,RMV12,WAG11
1	113178213	113179257	ATF6	intronic	NA	1044|1277	s10313,s10314,s10315|s10313,s358098,s10315	b1_1_113178213|b2_1_113178213	-	Reference,KAZ11,KAZ12,QK11,QK12,WZM11,WZM12,YUN11,KER11,KER12,DOR11,DOR12,MER11,SFK11,CHA11,WDU11,WDU12,WAG12|YUN12,FRI11,FRI12,MER12,ROM11,ROM12,SFK12,TEX11,TEX12,CHA12,RMV11,RMV12,WAG11
1	114557177	114557732	CCDC190(dist=112247),RGS4(dist=163453)	intergenic	NA	555|639	s10426,s10427,s10428|s10426,s381193,s10428	b1_1_114557177|b2_1_114557177	-	Reference,KAZ11,KAZ12,QK11,QK12,WZM11,WZM12,YUN12,KER11,KER12,DOR11,DOR12,FRI11,FRI12,MER11,MER12,ROM11,ROM12,SFK11,TEX11,TEX12,CHA11,CHA12,WDU11,WDU12,RMV11,RMV12,WAG11,WAG12|YUN11,SFK12
1	115331837	115331999	NUF2(dist=273092),TRNAW-CCA(dist=1000584)	intergenic	NA	162|128	s10495,s10496,s10497|s10495,s320697,s10497	b1_1_115331837|b2_1_115331837	-	Reference,KAZ11,QK12,WZM11,WZM12,YUN11,YUN12,KER11,DOR11,DOR12,FRI11,FRI12,MER12,ROM11,ROM12,SFK11,SFK12,TEX11,TEX12,CHA12,WDU11,WDU12,RMV12,WAG11,WAG12|KAZ12,QK11,KER12,MER11,CHA11,RMV11
1	116034215	116035499	NUF2(dist=975470),TRNAW-CCA(dist=297084)	intergenic	NA	1284|1930	s10587,s10588,s10589,s10590|s10587,s276222,s10589,s10590	b1_1_116034215|b2_1_116034215	-	Reference,FRI12,TEX12|KAZ11,QK11,QK12,WZM11,WZM12,YUN11,YUN12,KER11,KER12,DOR11,DOR12,FRI11,MER11,MER12,ROM11,ROM12,SFK11,SFK12,TEX11,CHA11,CHA12,WDU11,RMV11,WAG11,WAG12
1	116934538	116935104	PBX1(dist=90810),LMX1A(dist=234047)	intergenic	NA	566|918	s10675,s10676,s10677|s10675,s439658,s10677	b1_1_116934538|b2_1_116934538	-	Reference,KAZ11,KAZ12,QK11,QK12,WZM11,WZM12,YUN11,YUN12,KER11,KER12,DOR11,DOR12,FRI11,FRI12,MER11,MER12,ROM11,ROM12,SFK11,SFK12,TEX11,TEX12,CHA11,CHA12,WDU12,RMV11,RMV12,WAG11,WAG12|WDU11
1	117827329	117828002	TMCO1	intronic	NA	673|747	s10768,s10769,s10770|s10768,s10769,s276205,s10770	b1_1_117827329|b2_1_117827329	-	Reference,QK11,KER11,KER12,FRI11,FRI12,SFK11,TEX11,RMV12,WAG11,WAG12|KAZ11,KAZ12,QK12,WZM12,YUN11,YUN12,DOR11,DOR12,MER11,MER12,ROM11,ROM12,SFK12,TEX12,CHA11,CHA12,WDU11,WDU12,RMV11
1	118008231	118009166	UCK2(dist=22360),FAM78B(dist=159588)	intergenic	NA	935|2435	s10787,s10788,s10789|s10787,s276202,s10789	b1_1_118008231|b2_1_118008231	-	Reference,KAZ12,QK12,WZM11,YUN12,FRI12,MER12,ROM11,ROM12,SFK12,CHA11,CHA12,WDU11|KAZ11,QK11,WZM12,YUN11,KER11,KER12,DOR11,DOR12,FRI11,SFK11,TEX12,WDU12,RMV11,RMV12,WAG11,WAG12
1	118013921	118014040	UCK2(dist=28050),FAM78B(dist=154714)	intergenic	NA	119|302	s10791,s10792,s10793|s10791,s358079,s10793	b1_1_118013921|b2_1_118013921	-	Reference,KAZ11,KAZ12,QK11,QK12,WZM11,WZM12,YUN12,KER12,DOR12,FRI11,FRI12,MER12,ROM11,ROM12,SFK12,TEX12,CHA11,CHA12,WDU11,WDU12,RMV11|YUN11,KER11,DOR11,SFK11,RMV12,WAG11,WAG12
1	118289201	118289408	FAM78B(dist=26382),LOC101109936(dist=367776)	intergenic	NA	207|3346	s10805,s10806,s10807|s10805,s391931,s10807	b1_1_118289201|b2_1_118289201	-	Reference,KAZ11,KAZ12,QK11,QK12,WZM11,WZM12,YUN11,YUN12,KER12,DOR11,DOR12,FRI11,FRI12,MER11,MER12,ROM11,ROM12,SFK11,SFK12,TEX11,TEX12,CHA11,CHA12,WDU11,WDU12,RMV11,RMV12,WAG11,WAG12|KER11
1	118472397	118472694	FAM78B(dist=209578),LOC101109936(dist=184490)	intergenic	NA	297|133	s10815,s10816,s10817|s10815,s320673,s10817	b1_1_118472397|b2_1_118472397	-	Reference,KAZ11,WZM11,WZM12,YUN11,KER11,DOR12,ROM11,SFK12,CHA11,CHA12,WDU11,RMV11,RMV12,WAG11,WAG12|KAZ12,QK11,QK12,YUN12,KER12,DOR11,FRI11,FRI12,MER11,MER12,ROM12,SFK11,TEX11,TEX12,WDU12
1	118664303	118665281	LOC101109936	intronic	NA	978|922	s10853,s10854,s10855|s10853,s333381,s10855	b1_1_118664303|b2_1_118664303	-	Reference,KAZ11,KAZ12,QK12,WZM11,WZM12,YUN11,YUN12,KER11,KER12,DOR11,FRI11,FRI12,MER11,MER12,ROM11,ROM12,TEX11,TEX12,CHA11,CHA12,WDU11,WDU12,RMV11,RMV12,WAG11,WAG12|QK11,DOR12,SFK11,SFK12
1	119132795	119146743	MAEL(dist=50974),GPA33(dist=24531)	intergenic	NA	13948|1513	s10892,s10893,s10894|s10892,s276181,s10894	b1_1_119132795|b2_1_119132795	-	Reference,KAZ12,YUN11,YUN12,KER11,DOR12,FRI11,FRI12,MER11,SFK11,TEX11,TEX12,CHA12,WDU11,RMV11,RMV12,WAG11,WAG12|KAZ11,QK11,QK12,WZM11,WZM12,KER12,DOR11,MER12,ROM11,ROM12,SFK12,CHA11,WDU12
1	119337264	119337808	STYXL2(dist=44472),POU2F1(dist=90635)	intergenic	NA	544|365	s10914,s10915,s10916,s10917,s10918|s10914,s320666,s10916,s320665,s10918	b1_1_119337264|b2_1_119337264	-	Reference|KAZ12,WZM11,YUN12,DOR12,ROM11,TEX11,CHA12,WDU11,WDU12,RMV11,WAG11
1	121694546	121695424	KCNE1(dist=15051),SMIM34(dist=9600)	intergenic	NA	878|966	s11068,s11069,s11070|s11068,s277154,s11070	b1_1_121694546|b2_1_121694546	-	Reference,DOR12,MER12,SFK12,TEX12,CHA11,WDU11|KAZ11,KAZ12,QK11,QK12,WZM11,WZM12,YUN11,YUN12,KER11,KER12,DOR11,FRI11,FRI12,ROM12,SFK11,TEX11,RMV11,RMV12,WAG11,WAG12
1	121725431	121725659	SMIM11	intronic	NA	228|214	s11072,s11073,s11074|s11072,s415048,s11074	b1_1_121725431|b2_1_121725431	-	Reference,KAZ11,KAZ12,QK11,QK12,WZM11,WZM12,YUN11,YUN12,KER11,KER12,DOR11,DOR12,FRI11,FRI12,ROM12,SFK11,SFK12,TEX11,TEX12,CHA11,WDU12,RMV11,RMV12,WAG11,WAG12|MER12
1	121947361	121949609	KCNE2(dist=180280),MRPS6(dist=79740)	intergenic	NA	2248|538	s11085,s11086,s11087|s11085,s413272,s11087	b1_1_121947361|b2_1_121947361	-	Reference,KAZ11,QK11,QK12,WZM11,WZM12,YUN11,YUN12,KER11,KER12,DOR11,DOR12,FRI11,FRI12,ROM11,ROM12,SFK11,TEX11,CHA11,CHA12,WDU11,RMV11,RMV12,WAG11,WAG12|MER11,MER12,SFK12,TEX12,WDU12
1	122226168	122226283	MRPS6(dist=130278),ATP5PO(dist=67641)	intergenic	NA	115|206	s11093,s11094,s11095|s11093,s277149,s11095	b1_1_122226168|b2_1_122226168	-	Reference,KAZ12,QK11,QK12,WZM11,WZM12,YUN11,YUN12,KER12,FRI11,FRI12,ROM11,SFK11,TEX11,WDU11,WDU12,RMV11,WAG12|KAZ11,DOR12,MER11,MER12,ROM12,SFK12,TEX12,CHA11,CHA12,RMV12,WAG11
1	123167482	123167609	IFNAR2(dist=152764),OLIG1(dist=1191)	intergenic	NA	127|109	s11147,s11148,s11149|s11147,s433650,s11149	b1_1_123167482|b2_1_123167482	-	Reference,KAZ11,KAZ12,QK11,QK12,WZM11,WZM12,YUN11,YUN12,KER12,DOR11,DOR12,FRI11,FRI12,MER11,MER12,ROM11,ROM12,SFK11,SFK12,TEX12,CHA11,CHA12,WDU11,WDU12,RMV11,RMV12,WAG11,WAG12|TEX11
1	123704294	123704420	EVA1C	intronic	NA	126|127	s11187,s11188,s11189|s11187,s437468,s11189	b1_1_123704294|b2_1_123704294	-	Reference,KAZ11,KAZ12,QK11,QK12,WZM11,WZM12,YUN11,YUN12,KER11,KER12,DOR11,DOR12,FRI11,FRI12,MER11,MER12,ROM11,ROM12,SFK11,SFK12,TEX11,TEX12,CHA11,WDU12,RMV11,RMV12,WAG11,WAG12|CHA12
1	123867129	123867404	URB1(dist=1260),LOC105609272(dist=1337)	intergenic	NA	275|387	s11229,s11230,s11231|s11229,s277116,s11231	b1_1_123867129|b2_1_123867129	-	Reference,ROM11,SFK11|KAZ11,KAZ12,QK11,QK12,WZM11,WZM12,YUN11,YUN12,KER12,DOR11,DOR12,FRI11,FRI12,MER12,ROM12,SFK12,TEX11,CHA11,CHA12,WDU12,RMV11,RMV12,WAG11,WAG12
1	124011334	124011509	MIS18A(dist=95850),HUNK(dist=192442)	intergenic	NA	175|224	s11244,s11245,s11246|s11244,s335398,s11246	b1_1_124011334|b2_1_124011334	-	Reference,KAZ11,KAZ12,WZM11,WZM12,YUN12,KER12,DOR11,FRI11,FRI12,MER11,MER12,ROM11,ROM12,SFK11,SFK12,CHA11,CHA12,WDU11,WDU12,RMV11,RMV12,WAG11,WAG12|QK11,QK12,YUN11,KER11,DOR12,TEX11,TEX12
1	124052065	124052472	MIS18A(dist=136581),HUNK(dist=151479)	intergenic	NA	407|552	s11252,s11253,s11254|s11252,s277112,s11254	b1_1_124052065|b2_1_124052065	-	Reference,KAZ12,QK11,QK12,WZM11,WZM12,YUN11,YUN12,KER11,KER12,DOR11,DOR12,FRI11,FRI12,MER11,ROM11,ROM12,SFK11,TEX11,TEX12,CHA11,CHA12,WDU12,RMV12,WAG11,WAG12|KAZ11,MER12,SFK12,WDU11,RMV11
1	125177913	125181470	TIAM1(dist=72277),LOC101103772(dist=173385)	intergenic	NA	3557|3988	s11366,s11367,s11368|s11366,s335393,s11368	b1_1_125177913|b2_1_125177913	-	Reference,KAZ11,KAZ12,QK12,WZM12,YUN11,YUN12,KER11,KER12,FRI11,MER11,MER12,ROM11,SFK11,SFK12,TEX12,CHA11,CHA12,WDU11,RMV12,WAG11|QK11,WZM11,DOR11,DOR12,FRI12,ROM12,TEX11,WDU11,WDU12,RMV11,WAG12
1	125269247	125269454	TIAM1(dist=163611),LOC101103772(dist=85401)	intergenic	NA	207|237	s11374,s11375,s11376,s11377,s11378|s11374,s277093,s11378	b1_1_125269247|b2_1_125269247	-	Reference,YUN11,TEX12,WDU12|KAZ11,QK11,WZM11,DOR11,DOR12,MER12,ROM11,ROM12,SFK11,SFK12,CHA11,CHA12,RMV11,RMV12,WAG12
1	125966805	125967083	LOC114113348(dist=119608),LOC114109328(dist=27538)	intergenic	NA	278|385	s11454,s11455,s11456|s11454,s415057,s11456	b1_1_125966805|b2_1_125966805	-	Reference,KAZ11,KAZ12,QK11,QK12,WZM11,WZM12,YUN11,YUN12,KER11,KER12,DOR11,DOR12,FRI11,FRI12,MER11,ROM11,ROM12,SFK11,SFK12,TEX11,TEX12,CHA11,CHA12,WDU11,WDU12,WAG11,WAG12|MER12,RMV11,RMV12
1	125985133	125985600	LOC114113348(dist=137936),LOC114109328(dist=9021)	intergenic	NA	467|1598	s11458,s11459,s11460|s11458,s415058,s11460	b1_1_125985133|b2_1_125985133	-	Reference,KAZ11,KAZ12,QK11,QK12,WZM11,WZM12,YUN11,YUN12,KER11,KER12,DOR11,DOR12,FRI11,FRI12,MER11,ROM11,ROM12,SFK11,SFK12,TEX11,TEX12,CHA11,CHA12,WDU11,WDU12,WAG11,WAG12|MER12,RMV11,RMV12
1	127736633	127737044	USP16	intronic	NA	411|683	s11603,s11604,s11605|s11603,s335382,s11605	b1_1_127736633|b2_1_127736633	-	Reference,KAZ11,KAZ12,QK12,WZM11,YUN11,YUN12,KER12,DOR11,FRI11,FRI12,MER11,MER12,ROM11,SFK12,TEX11,TEX12,CHA12,WDU11,WDU12,RMV11,RMV12,WAG11,WAG12|QK11,WZM12,KER11,DOR12,ROM12,SFK11,CHA11
1	128031120	128032293	N6AMT1(dist=162108),TRNAS-GGA(dist=1739336)	intergenic	NA	1173|177	s11627,s11628,s11629|s11627,s277053,s11629	b1_1_128031120|b2_1_128031120	-	Reference,KER11,DOR12,MER12,SFK11,TEX11|KAZ11,KAZ12,QK11,QK12,WZM11,WZM12,YUN11,YUN12,KER12,DOR11,FRI11,FRI12,MER11,ROM11,ROM12,SFK12,TEX12,CHA11,CHA12,WDU11,WDU12,RMV11,RMV12,WAG11,WAG12
1	128486274	128486560	N6AMT1(dist=617262),TRNAS-GGA(dist=1285069)	intergenic	NA	286|225	s11684,s11685,s11686|s11684,s277046,s11686	b1_1_128486274|b2_1_128486274	-	Reference,QK12,WZM12,FRI11,MER11,MER12,WDU11,WAG11,WAG12|KAZ11,KAZ12,QK11,WZM11,YUN11,YUN12,KER11,KER12,DOR11,DOR12,FRI12,ROM11,ROM12,SFK11,SFK12,TEX11,TEX12,CHA11,CHA12,WDU11,RMV11,RMV12
1	129134226	129134489	N6AMT1(dist=1265214),TRNAS-GGA(dist=637140)	intergenic	NA	263|189	s11761,s11762,s11763|s11761,s393973,s11763	b1_1_129134226|b2_1_129134226	-	Reference,KAZ11,KAZ12,QK11,QK12,WZM11,WZM12,YUN11,YUN12,KER11,FRI11,MER11,MER12,ROM12,RMV11,RMV12,WAG11,WAG12|KER12,DOR11,DOR12,FRI12,ROM11,SFK11,SFK12,TEX11,TEX12,CHA11,CHA12,WDU11,WDU12
1	129527321	129527902	N6AMT1(dist=1658309),TRNAS-GGA(dist=243727)	intergenic	NA	581|313	s11824,s11825,s11826|s11824,s357017,s11826	b1_1_129527321|b2_1_129527321	-	Reference,KAZ11,KAZ12,QK11,QK12,WZM11,WZM12,YUN11,YUN12,KER11,KER12,DOR11,DOR12,FRI11,FRI12,MER11,MER12,ROM11,SFK11,SFK12,TEX11,TEX12,CHA11,CHA12,WDU11,WDU12,RMV11,RMV12,WAG12|WAG11
1	129784506	129785257	TRNAS-GGA(dist=12806),ADAMTS5(dist=233204)	intergenic	NA	751|163	s11861,s11862,s11863|s11861,s401882,s11863	b1_1_129784506|b2_1_129784506	-	Reference,KAZ11,KAZ12,QK11,QK12,WZM11,WZM12,YUN11,YUN12,KER11,KER12,DOR11,FRI11,MER11,MER12,ROM11,ROM12,SFK11,SFK12,TEX11,CHA11,CHA12,WDU11,WDU12,RMV11,RMV12,WAG11,WAG12|DOR12,FRI12,TEX12
1	130692096	130692196	TRNAS-GGA(dist=24319),LOC101111593(dist=146681)	intergenic	NA	100|146	s11933,s11934,s11935|s11933,s357028,s11935	b1_1_130692096|b2_1_130692096	-	Reference,KAZ11,KAZ12,QK11,QK12,WZM11,WZM12,YUN12,KER11,KER12,DOR11,DOR12,FRI11,FRI12,MER11,MER12,ROM11,ROM12,SFK11,SFK12,TEX11,TEX12,CHA11,CHA12,WDU11,WDU12,RMV11,RMV12,WAG12|WAG11
1	131205985	131206994	LOC101111593(dist=54494),GABPA(dist=55361)	intergenic	NA	1009|9019	s11984,s11985,s11986|s11984,s277006,s11986	b1_1_131205985|b2_1_131205985	-	Reference,KAZ12,QK11,QK12,WZM11,WZM12,YUN11,YUN12,KER11,KER12,DOR11,DOR12,FRI11,FRI12,MER11,MER12,ROM11,ROM12,SFK11,SFK12,TEX11,TEX12,CHA11,CHA12,WDU11,WDU12,RMV11,RMV12,WAG11,WAG12|KAZ11
1	131269351	131270714	GABPA	intronic	NA	1363|814	s11988,s11989,s11990|s11988,s428711,s11990	b1_1_131269351|b2_1_131269351	-	Reference,KAZ11,KAZ12,QK11,QK12,WZM11,WZM12,YUN11,YUN12,KER11,KER12,DOR11,DOR12,FRI11,FRI12,MER11,MER12,ROM11,ROM12,TEX11,TEX12,CHA11,CHA12,WDU11,WDU12,RMV11,RMV12,WAG11,WAG12|SFK11,SFK12
1	131882206	131882670	MRPL39(dist=421612),LOC121818678(dist=398374)	intergenic	NA	464|2277	s12041,s12042,s12043|s12041,s316650,s12043	b1_1_131882206|b2_1_131882206	-	Reference,KAZ11,QK11,QK12,WZM12,YUN11,KER11,DOR11,FRI11,FRI12,MER11,MER12,ROM11,ROM12,SFK11,SFK12,TEX11,CHA11,CHA12,WDU11,RMV11,RMV12,WAG11,WAG12|KAZ12,WZM11,YUN12,KER12,DOR12,TEX12,WDU12
1	132023836	132024034	MRPL39(dist=563242),LOC121818678(dist=257010)	intergenic	NA	198|123	s12059,s12060,s12061|s12059,s276997,s12061	b1_1_132023836|b2_1_132023836	-	Reference,QK11,QK12,YUN11,KER12,FRI11,MER11,SFK12,CHA11,WDU11,WDU12,RMV12,WAG11,WAG12|KAZ11,KAZ12,WZM11,WZM12,YUN12,KER11,DOR11,DOR12,FRI12,MER12,ROM11,ROM12,SFK11,TEX11,TEX12,CHA12,RMV11
1	132164413	132164655	MRPL39(dist=703819),LOC121818678(dist=116389)	intergenic	NA	242|385	s12096,s12097,s12098|s12096,s426990,s12098	b1_1_132164413|b2_1_132164413	-	Reference,KAZ11,KAZ12,QK11,QK12,WZM11,WZM12,YUN11,YUN12,KER11,KER12,DOR11,DOR12,FRI11,FRI12,MER11,MER12,ROM11,SFK11,SFK12,TEX11,TEX12,CHA11,CHA12,WDU11,WDU12,RMV11,RMV12,WAG11,WAG12|ROM12
1	132263789	132264157	MRPL39(dist=803195),LOC121818678(dist=16887)	intergenic	NA	368|694	s12124,s12125,s12126|s12124,s375498,s12126	b1_1_132263789|b2_1_132263789	-	Reference,KAZ11,KAZ12,QK11,QK12,WZM11,YUN11,YUN12,KER12,DOR11,DOR12,FRI11,FRI12,MER11,MER12,ROM11,ROM12,SFK11,SFK12,TEX11,TEX12,CHA11,CHA12,WDU11,WDU12,RMV11,RMV12,WAG11,WAG12|WZM12,KER11
1	132646444	132647799	LOC121818678(dist=364507),TRNAS-GGA(dist=1525261)	intergenic	NA	1355|960	s12186,s12187,s12188|s12186,s276971,s12188	b1_1_132646444|b2_1_132646444	-	Reference,WZM11,DOR12,FRI12,ROM11,SFK11,TEX12,CHA11,WDU12,RMV11,WAG12|KAZ11,KAZ12,QK11,QK12,WZM12,YUN11,YUN12,KER11,KER12,DOR11,FRI11,MER11,MER12,ROM12,SFK12,TEX11,CHA12,WDU11,RMV12,WAG11
1	132686611	132687294	LOC121818678(dist=404674),TRNAS-GGA(dist=1485766)	intergenic	NA	683|4107	s12193,s12194,s12195|s12193,s276970,s12195	b1_1_132686611|b2_1_132686611	-	Reference,QK11,QK12,WZM11,YUN12,KER11,DOR12,FRI11,FRI12,MER12,ROM11,SFK11,SFK12,TEX11,TEX12,CHA11,WDU11,WDU12,RMV11,RMV12,WAG12|KAZ11,KAZ12,WZM12,YUN11,KER12,DOR11,ROM12,CHA12,WAG11
1	132754311	132754441	LOC121818678(dist=472374),TRNAS-GGA(dist=1418619)	intergenic	NA	130|524	s12205,s12206,s12207|s12205,s347335,s12207	b1_1_132754311|b2_1_132754311	-	Reference,KAZ11,KAZ12,QK11,WZM11,WZM12,YUN11,YUN12,KER11,KER12,DOR11,DOR12,FRI11,MER11,MER12,ROM11,ROM12,SFK11,SFK12,TEX11,TEX12,CHA11,CHA12,WDU11,WDU12,RMV12,WAG11,WAG12|QK12,FRI12,RMV11
1	133186695	133187068	LOC121818678(dist=904758),TRNAS-GGA(dist=985992)	intergenic	NA	373|355	s12312,s12313,s12314|s12312,s393959,s12314	b1_1_133186695|b2_1_133186695	-	Reference,KAZ11,KAZ12,QK11,QK12,WZM11,WZM12,YUN11,YUN12,KER11,DOR11,DOR12,FRI11,FRI12,MER11,MER12,ROM11,ROM12,SFK11,SFK12,TEX11,TEX12,CHA11,CHA12,WDU11,WDU12,RMV11,RMV12,WAG11,WAG12|KER12
1	133409707	133410491	LOC121818678(dist=1127770),TRNAS-GGA(dist=762569)	intergenic	NA	784|696	s12351,s12352,s12353|s12351,s276947,s12353	b1_1_133409707|b2_1_133409707	-	Reference,QK12,WZM12,RMV11|KAZ11,KAZ12,QK11,WZM11,YUN11,YUN12,KER11,KER12,DOR11,DOR12,FRI11,FRI12,MER11,MER12,ROM11,ROM12,SFK11,SFK12,TEX11,TEX12,CHA11,CHA12,WDU11,WDU12,RMV12,WAG11,WAG12
1	133573136	133573550	LOC121818678(dist=1291199),TRNAS-GGA(dist=599510)	intergenic	NA	414|340	s12382,s12383,s12384|s12382,s316674,s12384	b1_1_133573136|b2_1_133573136	-	Reference,KAZ11,QK11,QK12,WZM11,WZM12,YUN12,KER11,KER12,DOR12,FRI12,MER11,MER12,ROM12,SFK12,TEX11,TEX12,CHA11,CHA12,WDU12,RMV12,WAG11,WAG12|KAZ12,YUN11,DOR11,FRI11,ROM11,WDU11,RMV11
1	133709745	133713588	LOC121818678(dist=1427808),TRNAS-GGA(dist=459472)	intergenic	NA	3843|5594	s12402,s12403,s12404|s12402,s316680,s12404	b1_1_133709745|b2_1_133709745	-	Reference,KAZ11,QK11,QK12,WZM11,WZM12,YUN12,KER11,KER12,DOR12,FRI11,FRI12,MER11,MER12,ROM12,SFK11,SFK12,TEX11,TEX12,CHA11,CHA12,WDU12,RMV11,RMV12,WAG11,WAG12|KAZ12,YUN11,DOR11,ROM11
1	134166703	134167826	LOC121818678(dist=1884766),TRNAS-GGA(dist=5234)	intergenic	NA	1123|2001	s12467,s12468,s12469|s12467,s12468,s276937,s12469	b1_1_134166703|b2_1_134166703	-	Reference,QK11,YUN12|KAZ11,QK12,WZM11,WZM12,KER11,KER12,DOR11,DOR12,FRI11,FRI12,MER11,MER12,ROM12,SFK11,CHA12,WDU11,RMV11,RMV12,WAG11
1	134834731	134834878	TRNAS-GGA(dist=661600),LOC114112591(dist=232575)	intergenic	NA	147|882	s12578,s12579,s12580|s12578,s356928,s12580	b1_1_134834731|b2_1_134834731	-	Reference,KAZ11,KAZ12,QK11,QK12,WZM11,WZM12,YUN12,KER11,KER12,DOR11,DOR12,FRI11,MER11,MER12,ROM11,ROM12,SFK11,SFK12,TEX11,CHA11,WDU11,WDU12,RMV11,WAG12|YUN11,FRI12,TEX12,CHA12,RMV12,WAG11
1	135411606	135411772	LOC114112591(dist=343731),TRNAS-GGA(dist=336295)	intergenic	NA	166|3668	s12647,s12648,s12649|s12647,s276908,s12649	b1_1_135411606|b2_1_135411606	-	Reference,KAZ12,QK11,QK12,WZM11,WZM12,YUN12,KER11,KER12,DOR11,DOR12,FRI11,FRI12,MER11,MER12,ROM12,SFK11,TEX11,TEX12,CHA11,CHA12,WDU12,RMV11,RMV12,WAG11,WAG12|KAZ11,YUN11,ROM11,SFK12,WDU11
1	135653014	135653386	LOC114112591(dist=585139),TRNAS-GGA(dist=94681)	intergenic	NA	372|8174	s12691,s12692,s12693|s12691,s421081,s12693	b1_1_135653014|b2_1_135653014	-	Reference,KAZ11,KAZ12,QK11,QK12,WZM11,WZM12,YUN11,YUN12,KER11,KER12,DOR11,DOR12,FRI11,FRI12,MER11,MER12,ROM11,ROM12,SFK11,SFK12,TEX11,TEX12,CHA11,CHA12,WDU11,RMV11,WAG11,WAG12|RMV12
1	135737543	135738282	LOC114112591(dist=669668),TRNAS-GGA(dist=9785)	intergenic	NA	739|458	s12710,s12711,s12712|s12710,s276898,s12712	b1_1_135737543|b2_1_135737543	-	Reference,QK11,QK12,WZM11,WZM12,YUN12,KER11,DOR11,DOR12,FRI11,FRI12,MER11,MER12,ROM11,SFK11,SFK12,TEX11,TEX12,CHA11,CHA12,WDU11,WDU12,RMV11,RMV12,WAG11,WAG12|KAZ11,KAZ12,YUN11,KER12,ROM12
1	135808421	135811295	TRNAS-GGA(dist=60283),NCAM2(dist=238440)	intergenic	NA	2874|1171	s12722,s12723,s12724|s12722,s421083,s12724	b1_1_135808421|b2_1_135808421	-	Reference,KAZ11,KAZ12,QK11,QK12,WZM11,WZM12,YUN11,YUN12,KER11,KER12,DOR11,DOR12,FRI11,FRI12,MER11,MER12,ROM11,ROM12,SFK11,SFK12,TEX11,TEX12,CHA11,CHA12,WDU11,WDU12,RMV11,WAG11,WAG12|RMV12
1	135861831	135865660	TRNAS-GGA(dist=113693),NCAM2(dist=184075)	intergenic	NA	3829|10613	s12735,s12736,s12737|s12735,s276891,s12737	b1_1_135861831|b2_1_135861831	-	Reference,KAZ12,QK11,QK12,WZM11,WZM12,YUN12,KER11,DOR12,FRI11,FRI12,MER11,MER12,ROM11,ROM12,SFK11,SFK12,TEX11,TEX12,CHA11,CHA12,WDU11,WDU12,RMV11,RMV12,WAG11,WAG12|KAZ11,YUN11
1	135935656	135937254	TRNAS-GGA(dist=187518),NCAM2(dist=112481)	intergenic	NA	1598|3398	s12748,s12749,s12750|s12748,s356933,s12750	b1_1_135935656|b2_1_135935656	-	Reference,KAZ11,KAZ12,QK11,QK12,WZM11,WZM12,YUN11,KER12,DOR11,DOR12,FRI11,MER11,MER12,ROM12,SFK11,SFK12,TEX11,TEX12,RMV11|YUN12,KER11,FRI12,ROM11,CHA11,CHA12,WDU11,WDU12,RMV12,WAG11,WAG12
1	136142594	136144891	NCAM2	intronic	NA	2297|142	s12783,s12784,s12785|s12783,s347038,s12785	b1_1_136142594|b2_1_136142594	-	Reference,KAZ11,KAZ12,QK11,WZM11,WZM12,YUN12,KER11,KER12,FRI12,MER12,ROM12,TEX12,WDU11,WDU12,RMV11,RMV12,WAG11,WAG12|QK12,YUN11,DOR11,DOR12,FRI11,MER11,ROM11,SFK11,SFK12,TEX11,CHA11,CHA12
1	136153200	136153432	NCAM2	intronic	NA	232|124	s12787,s12788,s12789|s12787,s431123,s12789	b1_1_136153200|b2_1_136153200	-	Reference,KAZ11,KAZ12,QK11,QK12,WZM11,WZM12,YUN11,YUN12,KER11,KER12,DOR11,DOR12,FRI11,FRI12,MER11,MER12,ROM11,ROM12,SFK11,TEX11,TEX12,CHA11,CHA12,WDU11,WDU12,RMV11,RMV12,WAG11,WAG12|SFK12
1	136969827	136969970	NCAM2(dist=313076),TRNAS-GGA(dist=619604)	intergenic	NA	143|131	s12927,s12928,s12929|s12927,s276871,s12929	b1_1_136969827|b2_1_136969827	-	Reference|KAZ11,KAZ12,QK11,QK12,WZM11,WZM12,YUN11,YUN12,KER11,KER12,DOR11,DOR12,FRI11,FRI12,MER11,MER12,ROM11,ROM12,SFK11,SFK12,TEX11,TEX12,CHA11,CHA12,WDU11,WDU12,RMV11,RMV12,WAG11,WAG12
1	137017072	137017825	NCAM2(dist=360321),TRNAS-GGA(dist=571749)	intergenic	NA	753|676	s12938,s12939,s12940|s12938,s393946,s12940	b1_1_137017072|b2_1_137017072	-	Reference,KAZ11,KAZ12,QK11,QK12,WZM11,WZM12,YUN11,YUN12,KER11,DOR11,DOR12,FRI11,FRI12,MER11,MER12,ROM11,ROM12,SFK11,SFK12,TEX11,TEX12,CHA11,CHA12,WDU11,WDU12,RMV11,WAG11,WAG12|KER12,RMV12
1	137105606	137105762	NCAM2(dist=448855),TRNAS-GGA(dist=483812)	intergenic	NA	156|235	s12965,s12966,s12967|s12965,s409401,s12967	b1_1_137105606|b2_1_137105606	-	Reference,KAZ11,QK11,QK12,WZM11,WZM12,YUN11,YUN12,KER11,KER12,DOR11,DOR12,FRI11,MER11,MER12,ROM11,ROM12,SFK11,SFK12,TEX11,TEX12,CHA11,RMV11,RMV12,WAG11,WAG12|FRI12,CHA12,WDU11
1	137175341	137175951	NCAM2(dist=518590),TRNAS-GGA(dist=413623)	intergenic	NA	610|1781	s12976,s12977,s12978|s12976,s434429,s12978	b1_1_137175341|b2_1_137175341	-	Reference,KAZ11,QK11,QK12,WZM11,WZM12,YUN11,YUN12,KER11,KER12,DOR11,DOR12,FRI11,FRI12,MER11,MER12,ROM11,ROM12,SFK11,SFK12,TEX11,CHA11,CHA12,WDU11,RMV11,RMV12,WAG11,WAG12|TEX12
1	137330504	137330942	NCAM2(dist=673753),TRNAS-GGA(dist=258632)	intergenic	NA	438|965	s13006,s13007,s13008,s13009|s13006,s385845,s13008,s13009	b1_1_137330504|b2_1_137330504	-	Reference|YUN12,KER12,DOR11,DOR12,MER11,ROM11,SFK12,CHA11
1	137765356	137765710	TRNAF-GAA(dist=116036),TRNAG-GCC(dist=476210)	intergenic	NA	354|295	s13080,s13081,s13082|s13080,s373131,s13082	b1_1_137765356|b2_1_137765356	-	Reference,KAZ11,KAZ12,QK11,QK12,WZM12,YUN12,KER11,DOR11,FRI11,MER11,ROM12,SFK11,SFK12,TEX12,CHA11,CHA12,WDU11,RMV12,WAG11,WAG12|WZM11,YUN11,KER12,DOR12,FRI12,MER12,ROM11,TEX11,WDU12,RMV11
1	137789732	137789905	TRNAF-GAA(dist=140412),TRNAG-GCC(dist=452015)	intergenic	NA	173|173	s13082,s13083,s13084|s13082,s384022,s13084	b1_1_137789732|b2_1_137789732	-	Reference,KAZ11,KAZ12,QK11,QK12,WZM11,WZM12,YUN12,KER11,KER12,DOR11,DOR12,FRI11,FRI12,MER11,MER12,ROM11,ROM12,SFK11,SFK12,TEX11,TEX12,CHA11,CHA12,WDU11,WDU12,RMV11,RMV12,WAG11,WAG12|YUN11
1	138062110	138062423	TRNAF-GAA(dist=412790),TRNAG-GCC(dist=179497)	intergenic	NA	313|462	s13131,s13132,s13133|s13131,s385843,s13133	b1_1_138062110|b2_1_138062110	-	Reference,KAZ11,KAZ12,QK11,QK12,WZM11,WZM12,YUN11,KER11,KER12,DOR11,DOR12,FRI11,FRI12,MER11,MER12,ROM11,ROM12,SFK11,SFK12,TEX11,TEX12,CHA11,CHA12,WDU11,WDU12,RMV11,RMV12,WAG11,WAG12|YUN12
1	138332144	138332691	TRNAG-GCC(dist=90154),TMPRSS15(dist=1035383)	intergenic	NA	547|8458	s13173,s13174,s13175|s13173,s276829,s13175	b1_1_138332144|b2_1_138332144	-	Reference,KER12,FRI12,MER12,ROM11,ROM12,SFK12,CHA12,WDU12,WAG11|KAZ11,KAZ12,QK11,QK12,WZM11,WZM12,YUN11,YUN12,KER11,DOR11,DOR12,FRI11,MER11,SFK11,TEX11,TEX12,CHA11,WDU11,RMV11,RMV12,WAG12
1	138600447	138602024	TRNAG-GCC(dist=358457),TMPRSS15(dist=766050)	intergenic	NA	1577|1616	s13232,s13233,s13234|s13232,s334914,s13234	b1_1_138600447|b2_1_138600447	-	Reference,KAZ11,KAZ12,SFK12,CHA11,CHA12,RMV11,WAG12|QK11,QK12,WZM11,WZM12,YUN11,YUN12,KER11,KER12,DOR11,DOR12,FRI11,FRI12,MER11,MER12,ROM11,SFK11,TEX11,TEX12,WDU11,WDU12,RMV12,WAG11
1	138750433	138751624	TRNAG-GCC(dist=508443),TMPRSS15(dist=616450)	intergenic	NA	1191|1275	s13267,s13268,s13269|s13267,s363350,s13269	b1_1_138750433|b2_1_138750433	-	Reference,KAZ11,KAZ12,QK11,QK12,WZM11,WZM12,YUN11,YUN12,KER11,KER12,DOR11,FRI11,FRI12,MER11,MER12,ROM12,SFK12,TEX12,CHA12,WDU11,WDU12,RMV12,WAG11|DOR12,ROM11,SFK11,TEX11,CHA11,RMV11,WAG12
1	138893619	138893932	TRNAG-GCC(dist=651629),TMPRSS15(dist=474142)	intergenic	NA	313|1496	s13295,s13296,s13297|s13295,s276824,s13297	b1_1_138893619|b2_1_138893619	-	Reference,KAZ12,WZM11,KER11,DOR12,FRI11,FRI12,MER11,MER12,ROM11,ROM12,SFK11,SFK12,TEX12,CHA11,WDU12,RMV12|KAZ11,QK11,QK12,WZM12,YUN11,YUN12,KER12,DOR11,TEX11,CHA12,WDU11,RMV11,WAG11,WAG12
1	139051832	139053468	TRNAG-GCC(dist=809842),TMPRSS15(dist=314606)	intergenic	NA	1636|7291	s13341,s13342,s13343|s13341,s319283,s13343	b1_1_139051832|b2_1_139051832	-	Reference,KAZ11,QK11,WZM11,WZM12,YUN11,YUN12,KER11,KER12,DOR11,DOR12,FRI11,FRI12,MER11,MER12,ROM12,SFK12,TEX11,TEX12,CHA11,CHA12,WDU11,WDU12,RMV11,RMV12,WAG11,WAG12|KAZ12,QK12,ROM11,SFK11
1	139417606	139421043	TMPRSS15	intronic	NA	3437|5050	s13402,s13403,s13404|s13402,s319286,s13404	b1_1_139417606|b2_1_139417606	-	Reference,KAZ11,QK11,WZM12,YUN11,KER11,KER12,FRI11,FRI12,MER12,ROM12,SFK11,TEX12,WDU11,WDU12,RMV11|KAZ12,QK12,WZM11,YUN12,DOR11,DOR12,MER11,ROM11,SFK12,TEX11,CHA11,CHA12,WAG11,WAG12
1	139605637	139608183	CHODL(dist=54382),C1H21orf91(dist=441783)	intergenic	NA	2546|4233	s13439,s13440,s13441|s13439,s397905,s13441	b1_1_139605637|b2_1_139605637	-	Reference,KAZ11,KAZ12,QK11,QK12,WZM11,WZM12,YUN11,YUN12,KER11,KER12,DOR12,FRI11,FRI12,MER11,MER12,ROM11,ROM12,SFK11,SFK12,TEX12,CHA11,CHA12,WDU11,WDU12,RMV11,RMV12,WAG11,WAG12|DOR11,TEX11
1	139798782	139799507	CHODL(dist=247527),C1H21orf91(dist=250459)	intergenic	NA	725|380	s13471,s13472,s13473|s13471,s375493,s13473	b1_1_139798782|b2_1_139798782	-	Reference,KAZ11,KAZ12,QK11,QK12,WZM11,KER11,KER12,DOR11,FRI12,MER12,ROM12,SFK11,SFK12,TEX11,WDU11,WDU12,RMV11,WAG11,WAG12|WZM12,YUN11,YUN12,DOR12,FRI11,MER11,ROM11,TEX12,CHA11,CHA12,RMV12
1	139906857	139907092	CHODL(dist=355602),C1H21orf91(dist=142874)	intergenic	NA	235|216	s13493,s13494,s13495|s13493,s397907,s13495	b1_1_139906857|b2_1_139906857	-	Reference,KAZ11,KAZ12,QK11,QK12,WZM11,WZM12,YUN11,YUN12,KER11,KER12,DOR12,FRI11,FRI12,MER11,MER12,ROM11,ROM12,SFK11,SFK12,TEX12,CHA11,CHA12,WDU11,WDU12,RMV11,RMV12,WAG11,WAG12|DOR11,TEX11
1	139947962	139948147	CHODL(dist=396707),C1H21orf91(dist=101819)	intergenic	NA	185|138	s13504,s13505,s13506|s13504,s276805,s13506	b1_1_139947962|b2_1_139947962	-	Reference|KAZ11,KAZ12,QK11,QK12,WZM11,WZM12,YUN11,YUN12,KER11,KER12,DOR11,DOR12,FRI11,FRI12,MER11,MER12,ROM11,ROM12,SFK11,SFK12,TEX11,TEX12,CHA11,CHA12,WDU11,WDU12,RMV11,RMV12,WAG11,WAG12
1	140777207	140777376	CXADR(dist=455080),MIRLET7C(dist=471081)	intergenic	NA	169|211	s13578,s13579,s13580|s13578,s346657,s13580	b1_1_140777207|b2_1_140777207	-	Reference,KAZ11,KAZ12,QK11,WZM11,WZM12,YUN11,YUN12,KER11,KER12,DOR11,DOR12,FRI11,FRI12,MER11,MER12,ROM11,ROM12,SFK11,SFK12,TEX11,TEX12,CHA11,CHA12,WDU11,WDU12,RMV11,RMV12,WAG11,WAG12|QK12
1	141804108	141806057	TRNAS-GGA(dist=290178),USP25(dist=173824)	intergenic	NA	1949|607	s13707,s13708,s13709|s13707,s421808,s13709	b1_1_141804108|b2_1_141804108	-	Reference,KAZ11,KAZ12,QK11,QK12,WZM11,WZM12,YUN11,YUN12,KER11,KER12,DOR11,DOR12,FRI11,FRI12,MER11,MER12,ROM11,ROM12,SFK11,SFK12,TEX11,TEX12,CHA11,CHA12,WDU11,WDU12,RMV11,WAG11,WAG12|RMV12
1	143970485	143970623	LIPI(dist=99916),LOC101123009(dist=662857)	intergenic	NA	138|201	s13885,s13886,s13887|s13885,s403550,s13887	b1_1_143970485|b2_1_143970485	-	Reference,KAZ11,KAZ12,QK11,QK12,WZM11,WZM12,YUN11,YUN12,KER11,KER12,DOR11,MER11,ROM11,ROM12,SFK11,TEX12,CHA11,WDU12,RMV11,WAG11,WAG12|DOR12,FRI11,FRI12,MER12,SFK12,TEX11,CHA12,WDU11,RMV12
1	143981782	143983002	LIPI(dist=111213),LOC101123009(dist=650478)	intergenic	NA	1220|1422	s13889,s13890,s13891|s13889,s318466,s13891	b1_1_143981782|b2_1_143981782	-	Reference,KAZ11,QK11,QK12,WZM11,WZM12,YUN11,YUN12,KER11,KER12,DOR11,DOR12,FRI11,FRI12,MER11,MER12,ROM11,ROM12,SFK11,SFK12,TEX11,CHA11,CHA12,WDU11,WDU12,RMV11,RMV12,WAG12|KAZ12,TEX12,WAG11
1	144084485	144086406	LIPI(dist=213916),LOC101123009(dist=547074)	intergenic	NA	1921|881	s13902,s13903,s13904|s13902,s336123,s13904	b1_1_144084485|b2_1_144084485	-	Reference,KAZ11,KAZ12,QK12,WZM11,WZM12,YUN11,YUN12,KER11,KER12,DOR12,FRI11,FRI12,MER11,TEX11,TEX12,CHA12,WDU11,WDU12,WAG11,WAG12|QK11,DOR11,MER12,ROM11,ROM12,SFK11,SFK12,CHA11,RMV11,RMV12
1	144100135	144100324	LIPI(dist=229566),LOC101123009(dist=533156)	intergenic	NA	189|152	s13907,s13908,s13909|s13907,s356912,s13909	b1_1_144100135|b2_1_144100135	-	Reference,KAZ11,KAZ12,QK11,WZM11,WZM12,YUN11,KER11,DOR11,FRI11,FRI12,MER11,MER12,ROM11,ROM12,SFK11,TEX11,TEX12,CHA12,WDU11,RMV12|QK12,YUN12,KER12,DOR12,SFK12,CHA11,WDU12,RMV11,WAG11,WAG12
1	144106426	144106598	LIPI(dist=235857),LOC101123009(dist=526882)	intergenic	NA	172|265	s13909,s13910,s13911,s13912|s13909,s13910,s276765,s13912	b1_1_144106426|b2_1_144106426	-	Reference|KAZ11,KAZ12,QK11,WZM12,KER11,KER12,DOR12,MER11,MER12,ROM11,SFK11,SFK12,TEX11,TEX12,CHA11,WDU11,WDU12,RMV11,WAG12
1	144522729	144522997	LIPI(dist=652160),LOC101123009(dist=110483)	intergenic	NA	268|1093	s13946,s13947,s13948|s13946,s403549,s13948	b1_1_144522729|b2_1_144522729	-	Reference,KAZ11,KAZ12,QK11,QK12,WZM11,WZM12,YUN11,YUN12,KER11,KER12,DOR11,MER11,MER12,ROM11,ROM12,SFK11,SFK12,TEX11,TEX12,CHA11,CHA12,WDU11,WDU12,RMV11,RMV12,WAG11,WAG12|DOR12,FRI11,FRI12
1	144537166	144538034	LIPI(dist=666597),LOC101123009(dist=95446)	intergenic	NA	868|782	s13952,s13953,s13954|s13952,s336127,s13954	b1_1_144537166|b2_1_144537166	-	Reference,KAZ11,KAZ12,WZM11,YUN11,DOR11,DOR12,FRI11,FRI12,MER12,ROM12,SFK11,SFK12,TEX12,CHA12,WDU12,RMV12,WAG11,WAG12|QK11,QK12,WZM12,YUN12,KER11,KER12,MER11,ROM11,TEX11,CHA11,WDU11,RMV11
1	144649102	144649320	LOC101123009(dist=14627),ROBO2(dist=597108)	intergenic	NA	218|953	s13970,s13971,s13972|s13970,s276752,s13972	b1_1_144649102|b2_1_144649102	-	Reference|KAZ11,KAZ12,QK11,QK12,WZM11,WZM12,YUN11,YUN12,KER11,KER12,DOR11,DOR12,FRI11,FRI12,MER11,MER12,ROM11,ROM12,SFK11,SFK12,TEX11,TEX12,CHA11,CHA12,WDU11,WDU12,RMV11,RMV12,WAG11,WAG12
1	144942094	144942794	LOC101123009(dist=307619),ROBO2(dist=303634)	intergenic	NA	700|182	s14010,s14011,s14012,s14013|s14010,s363330,s14013	b1_1_144942094|b2_1_144942094	-	Reference,KAZ11,KAZ12,QK11,QK12,YUN11,KER11,DOR12,FRI11,FRI12,MER12,ROM11,SFK11,TEX12,CHA12,WDU11,WDU12,RMV11,RMV12,WAG11|WZM12,YUN12,KER12,DOR11,MER11,SFK12,CHA11
1	146327964	146332597	ROBO2(dist=412482),TRNAC-ACA(dist=399015)	intergenic	NA	4633|1586	s14195,s14196,s14197|s14195,s397919,s14197	b1_1_146327964|b2_1_146327964	-	Reference,KAZ11,KAZ12,QK11,QK12,WZM11,WZM12,YUN11,YUN12,KER11,KER12,FRI11,FRI12,MER11,MER12,ROM11,ROM12,TEX12,CHA11,CHA12,WDU11,WDU12,RMV11,WAG11,WAG12|DOR11,DOR12,SFK11,SFK12,TEX11,RMV12
1	146575571	146575785	ROBO2(dist=660089),TRNAC-ACA(dist=155827)	intergenic	NA	214|178	s14227,s14228,s14229|s14227,s336143,s14229	b1_1_146575571|b2_1_146575571	-	Reference,KAZ11,KAZ12,WZM11,YUN11,KER11,KER12,DOR11,DOR12,FRI11,FRI12,MER12,ROM11,SFK11,SFK12,TEX12,CHA11,CHA12,WDU11,WDU12,WAG11,WAG12|QK11,QK12,WZM12,YUN12,MER11,ROM12,TEX11,RMV11,RMV12
1	146582098	146582383	ROBO2(dist=666616),TRNAC-ACA(dist=149229)	intergenic	NA	285|10057	s14231,s14232,s14233|s14231,s276704,s14233	b1_1_146582098|b2_1_146582098	-	Reference|KAZ11,KAZ12,QK11,QK12,WZM11,WZM12,YUN11,YUN12,KER11,KER12,DOR11,DOR12,FRI11,FRI12,MER11,MER12,ROM11,ROM12,SFK11,SFK12,TEX11,TEX12,CHA11,CHA12,WDU11,WDU12,RMV11,RMV12,WAG11,WAG12
1	146797226	146797495	TRNAC-ACA(dist=65543),ROBO1(dist=204369)	intergenic	NA	269|281	s14251,s14252,s14253|s14251,s415317,s14253	b1_1_146797226|b2_1_146797226	-	Reference,KAZ11,KAZ12,QK11,QK12,WZM11,WZM12,YUN11,YUN12,KER11,KER12,DOR11,DOR12,FRI11,FRI12,MER11,ROM11,ROM12,SFK11,SFK12,TEX11,TEX12,CHA11,CHA12,WDU11,WDU12,RMV11,RMV12,WAG11,WAG12|MER12
1	146818387	146818727	TRNAC-ACA(dist=86704),ROBO1(dist=183137)	intergenic	NA	340|514	s14257,s14258,s14259|s14257,s276697,s14259	b1_1_146818387|b2_1_146818387	-	Reference,KAZ12,WZM12,YUN12,KER11,KER12,DOR11,MER11,ROM12,SFK11,SFK12,CHA11,CHA12,WDU11,WAG11,WAG12|KAZ11,QK11,QK12,WZM11,YUN11,DOR12,FRI11,FRI12,MER12,ROM11,TEX11,TEX12,WDU12,RMV11,RMV12
1	147271817	147272201	ROBO1	intronic	NA	384|360	s14332,s14333,s14334,s14335|s14332,s276689,s14334,s14335	b1_1_147271817|b2_1_147271817	-	Reference|KAZ11,KAZ12,QK11,QK12,WZM11,WZM12,YUN11,YUN12,KER11,KER12,FRI11,FRI12,MER11,MER12,ROM11,ROM12,SFK11,SFK12,TEX11,TEX12,CHA11,CHA12,WDU11,WDU12,RMV11,RMV12,WAG11,WAG12
1	147314266	147315060	ROBO1	intronic	NA	794|230	s14336,s14337,s14338|s14336,s276688,s14338	b1_1_147314266|b2_1_147314266	-	Reference,KER11,KER12,MER12,TEX11,TEX12,CHA11|KAZ11,KAZ12,QK11,QK12,WZM11,WZM12,YUN11,YUN12,DOR11,DOR12,FRI11,FRI12,MER11,ROM11,ROM12,SFK11,SFK12,CHA12,WDU11,WDU12,RMV11,RMV12,WAG11,WAG12
1	147387349	147387714	ROBO1	intronic	NA	365|311	s14343,s14344,s14345|s14343,s336145,s14345	b1_1_147387349|b2_1_147387349	-	Reference,KAZ11,KAZ12,WZM11,YUN12,KER11,KER12,DOR11,DOR12,FRI11,FRI12,MER11,MER12,ROM11,SFK11,SFK12,TEX11,TEX12,CHA11,CHA12,WDU11,WDU12|QK11,QK12,WZM12,YUN11,ROM12,RMV11,RMV12,WAG11,WAG12
1	147639734	147640064	ROBO1	intronic	NA	330|4227	s14367,s14368,s14369|s14367,s276683,s14369	b1_1_147639734|b2_1_147639734	-	Reference,DOR11,DOR12|KAZ11,KAZ12,QK11,QK12,WZM11,WZM12,YUN11,YUN12,KER11,KER12,FRI11,FRI12,MER11,MER12,ROM11,ROM12,SFK11,SFK12,TEX11,TEX12,CHA11,CHA12,WDU11,RMV11,RMV12,WAG11,WAG12
1	147852984	147853649	ROBO1	intronic	NA	665|784	s14387,s14388,s14389|s14387,s318505,s14389	b1_1_147852984|b2_1_147852984	-	Reference,KAZ11,QK11,QK12,WZM11,WZM12,YUN11,YUN12,KER11,KER12,DOR11,DOR12,FRI11,FRI12,MER11,MER12,ROM11,ROM12,SFK11,SFK12,TEX11,TEX12,CHA11,CHA12,WDU11,RMV11,RMV12|KAZ12,WAG11,WAG12
1	149307708	149307880	TRNAC-GCA(dist=64299),LOC101119864(dist=691966)	intergenic	NA	172|193	s14644,s14645,s14646|s14644,s276645,s14646	b1_1_149307708|b2_1_149307708	-	Reference,QK12,WZM12,KER11,KER12,DOR12,FRI12,MER12,TEX12,CHA11,CHA12,WDU12,RMV11,WAG12|KAZ11,KAZ12,QK11,WZM11,YUN12,DOR11,FRI11,MER11,ROM11,ROM12,SFK11,SFK12,TEX11,TEX12,WDU11,WAG11
1	150658831	150660165	GBE1(dist=306692),TRNAC-ACA(dist=164432)	intergenic	NA	1334|1279	s14772,s14773,s14774|s14772,s276628,s14774	b1_1_150658831|b2_1_150658831	-	Reference,KAZ12,QK11,QK12,WZM11,WZM12,YUN12,KER11,KER12,DOR11,FRI11,MER12,ROM11,ROM12,SFK12,TEX12,CHA11,WDU11,WAG11|KAZ11,YUN11,DOR12,FRI12,MER11,SFK11,TEX11,CHA12,WDU12,RMV11,RMV12,WAG12
1	150910205	150912751	TRNAC-ACA(dist=85536),TRNAC-ACA(dist=1522773)	intergenic	NA	2546|2687	s14799,s14800,s14801|s14799,s375462,s14801	b1_1_150910205|b2_1_150910205	-	Reference,KAZ11,KAZ12,QK11,QK12,WZM11,KER11,KER12,DOR12,FRI12,MER11,MER12,ROM11,ROM12,SFK11,TEX11,TEX12,CHA11,WDU11,RMV11,RMV12,WAG11,WAG12|WZM12,YUN11,YUN12,DOR11,FRI11,SFK12,CHA12,WDU12
1	151004363	151004583	TRNAC-ACA(dist=179694),TRNAC-ACA(dist=1430941)	intergenic	NA	220|143	s14809,s14810,s14811|s14809,s276623,s14811	b1_1_151004363|b2_1_151004363	-	Reference,WZM12,YUN11,YUN12,DOR11,MER11,ROM12,SFK12,CHA12,WDU11,WDU12,RMV12|KAZ11,KAZ12,QK11,QK12,WZM11,KER11,KER12,DOR12,FRI11,FRI12,MER12,ROM11,SFK11,TEX11,TEX12,CHA11,RMV11,WAG11,WAG12
1	151316966	151317435	TRNAC-ACA(dist=492297),TRNAC-ACA(dist=1118089)	intergenic	NA	469|267	s14843,s14844,s14845|s14843,s276616,s14845	b1_1_151316966|b2_1_151316966	-	Reference,KAZ12,QK11,WZM11,WZM12,YUN11,YUN12,KER11,KER12,DOR11,DOR12,FRI11,FRI12,MER11,MER12,ROM11,ROM12,SFK11,SFK12,TEX11,TEX12,CHA11,WDU11,WDU12,RMV11,RMV12,WAG11,WAG12|KAZ11,QK12,CHA12
1	151526324	151526438	TRNAC-ACA(dist=701655),TRNAC-ACA(dist=909086)	intergenic	NA	114|173	s14869,s14870,s14871|s14869,s276613,s14871	b1_1_151526324|b2_1_151526324	-	Reference,KAZ12,YUN11,KER11,KER12,DOR11,ROM12,SFK11,SFK12,TEX12,CHA11,WDU11,WDU12,RMV11,WAG11,WAG12|KAZ11,QK11,QK12,WZM11,WZM12,YUN12,DOR12,FRI11,FRI12,MER11,MER12,ROM11,TEX11,CHA12,RMV12
1	152042609	152044526	TRNAC-ACA(dist=1217940),TRNAC-ACA(dist=390998)	intergenic	NA	1917|337	s14945,s14946,s14947|s14945,s403527,s14947	b1_1_152042609|b2_1_152042609	-	Reference,KAZ11,KAZ12,QK11,QK12,WZM11,WZM12,YUN11,YUN12,KER11,KER12,DOR11,FRI11,FRI12,MER11,MER12,ROM11,ROM12,SFK11,SFK12,TEX11,TEX12,CHA11,CHA12,WDU11,WDU12,RMV11,RMV12,WAG11,WAG12|DOR12
1	152567736	152568877	TRNAS-GGA(dist=79126),CADM2(dist=1273486)	intergenic	NA	1141|2495	s15008,s15009,s15010,s15011|s15008,s15009,s276590,s15011	b1_1_152567736|b2_1_152567736	-	Reference,WZM12,DOR11,FRI12,TEX11,CHA11,CHA12,WDU11,WDU12,WAG11|KAZ11,KAZ12,QK12,WZM11,YUN12,KER11,KER12,DOR12,FRI11,MER11,MER12,ROM11,ROM12,SFK11,SFK12,TEX12,RMV11,RMV12,WAG12
1	152762991	152763298	TRNAS-GGA(dist=274381),CADM2(dist=1079065)	intergenic	NA	307|390	s15053,s15054,s15055|s15053,s276586,s15055	b1_1_152762991|b2_1_152762991	-	Reference|KAZ11,KAZ12,QK11,QK12,WZM11,WZM12,YUN12,KER11,KER12,DOR11,DOR12,FRI11,FRI12,MER11,MER12,ROM11,ROM12,SFK11,SFK12,TEX11,TEX12,CHA11,CHA12,WDU11,WDU12,RMV11,RMV12,WAG11,WAG12
1	152790252	152793687	TRNAS-GGA(dist=301642),CADM2(dist=1048676)	intergenic	NA	3435|2580	s15058,s15059,s15060|s15058,s318544,s15060	b1_1_152790252|b2_1_152790252	-	Reference,KAZ11,QK11,QK12,WZM11,WZM12,DOR11,FRI11,MER12,ROM11,ROM12,SFK11,SFK12,CHA11,CHA12,WDU11,WDU12,RMV11,RMV12,WAG11,WAG12|KAZ12,YUN12,KER11,KER12,DOR12,FRI12,MER11,TEX11,TEX12
1	152833076	152833572	TRNAS-GGA(dist=344466),CADM2(dist=1008791)	intergenic	NA	496|879	s15067,s15068,s15069|s15067,s357035,s15069	b1_1_152833076|b2_1_152833076	-	Reference,KAZ11,KAZ12,QK11,QK12,WZM11,WZM12,YUN11,YUN12,KER11,KER12,DOR11,DOR12,FRI11,FRI12,MER11,ROM12,SFK11,TEX11,TEX12,CHA11,CHA12,WDU11,WDU12,RMV11,RMV12,WAG12|MER12,ROM11,SFK12,WAG11
1	152898239	152898426	TRNAS-GGA(dist=409629),CADM2(dist=943937)	intergenic	NA	187|731	s15075,s15076,s15077|s15075,s402841,s15077	b1_1_152898239|b2_1_152898239	-	Reference,KAZ11,KAZ12,QK11,QK12,WZM11,WZM12,YUN11,YUN12,KER11,KER12,DOR11,FRI11,FRI12,MER11,MER12,ROM12,TEX11,TEX12,CHA11,CHA12,WDU11,WDU12,RMV11,RMV12,WAG11,WAG12|DOR12,ROM11,SFK11,SFK12
1	153055693	153056927	TRNAS-GGA(dist=567083),CADM2(dist=785436)	intergenic	NA	1234|983	s15111,s15112,s15113|s15111,s371451,s15113	b1_1_153055693|b2_1_153055693	-	Reference,KAZ11,KAZ12,QK11,QK12,WZM12,YUN11,KER11,KER12,DOR11,DOR12,FRI11,FRI12,MER11,MER12,ROM11,ROM12,SFK12,TEX11,TEX12,CHA11,CHA12,WDU11,WDU12,RMV11,RMV12,WAG11,WAG12|WZM11,YUN12
1	153069039	153071896	TRNAS-GGA(dist=580429),CADM2(dist=770467)	intergenic	NA	2857|3010	s15118,s15119,s15120|s15118,s375456,s15120	b1_1_153069039|b2_1_153069039	-	Reference,KAZ11,KAZ12,QK11,QK12,WZM11,YUN11,YUN12,KER11,KER12,DOR11,DOR12,FRI11,FRI12,MER11,MER12,ROM11,ROM12,SFK11,SFK12,TEX11,TEX12,CHA11,CHA12,WDU11,WDU12,RMV11,RMV12,WAG11,WAG12|WZM12
1	153443256	153443746	TRNAS-GGA(dist=954646),CADM2(dist=398617)	intergenic	NA	490|110	s15212,s15213,s15214|s15212,s421946,s15214	b1_1_153443256|b2_1_153443256	-	Reference,KAZ11,KAZ12,QK11,QK12,WZM11,WZM12,YUN12,KER11,KER12,DOR11,DOR12,FRI11,FRI12,MER11,MER12,ROM11,ROM12,SFK11,SFK12,TEX12,CHA11,CHA12,WDU11,WDU12,RMV11,WAG11,WAG12|TEX11,RMV12
1	153502941	153503108	TRNAS-GGA(dist=1014331),CADM2(dist=339255)	intergenic	NA	167|129	s15219,s15220,s15221|s15219,s421944,s15221	b1_1_153502941|b2_1_153502941	-	Reference,KAZ11,KAZ12,QK11,QK12,WZM11,WZM12,YUN12,KER11,KER12,DOR11,DOR12,FRI11,FRI12,MER11,MER12,ROM11,ROM12,SFK11,SFK12,TEX12,CHA11,CHA12,WDU11,WDU12,RMV11,WAG11,WAG12|TEX11,RMV12
1	153757447	153757852	TRNAS-GGA(dist=1268837),CADM2(dist=84511)	intergenic	NA	405|264	s15267,s15268,s15269|s15267,s276546,s15269	b1_1_153757447|b2_1_153757447	-	Reference|KAZ11,KAZ12,QK11,QK12,WZM11,WZM12,YUN11,YUN12,KER11,KER12,DOR11,DOR12,FRI11,FRI12,MER11,MER12,ROM11,ROM12,SFK11,SFK12,TEX11,TEX12,CHA11,CHA12,WDU11,WDU12,RMV11,RMV12,WAG11,WAG12
1	153763172	153766000	TRNAS-GGA(dist=1274562),CADM2(dist=76363)	intergenic	NA	2828|499	s15271,s15272,s15273|s15271,s430380,s15273	b1_1_153763172|b2_1_153763172	-	Reference,KAZ11,KAZ12,QK11,QK12,WZM11,WZM12,YUN11,YUN12,KER11,KER12,DOR11,DOR12,FRI11,FRI12,MER11,MER12,ROM11,ROM12,SFK11,TEX11,TEX12,CHA11,CHA12,WDU11,WDU12,RMV11,RMV12,WAG11,WAG12|SFK12
1	153788875	153792231	TRNAS-GGA(dist=1300265),CADM2(dist=50132)	intergenic	NA	3356|2833	s15273,s15274,s15275,s15276,s15277,s15278|s15273,s15274,s15275,s15277,s15278	b1_1_153788875|b2_1_153788875	-	Reference,QK11,YUN11,SFK11,RMV12|noassemb
1	155121111	155121239	CADM2	intronic	NA	128|216	s15447,s15448,s15449|s15447,s353599,s15449	b1_1_155121111|b2_1_155121111	-	Reference,KAZ11,KAZ12,QK11,QK12,WZM11,YUN11,KER11,KER12,MER11,MER12,ROM11,ROM12,SFK11,TEX11,TEX12,CHA11,CHA12,WDU11,WDU12,WAG12|WZM12,YUN12,DOR11,DOR12,FRI11,FRI12,SFK12,RMV11,RMV12,WAG11
1	155362346	155362528	CADM2(dist=228536),TRNAC-ACA(dist=344942)	intergenic	NA	182|3006	s15468,s15469,s15470|s15468,s276511,s15470	b1_1_155362346|b2_1_155362346	-	Reference,KAZ12,WZM11,WZM12,YUN11,YUN12,KER11,KER12,DOR11,DOR12,MER11,MER12,ROM11,ROM12,SFK11,SFK12,TEX11,CHA11,CHA12,WDU11,WDU12,RMV11,RMV12,WAG12|KAZ11,QK11,QK12,FRI11,FRI12,TEX12,WAG11
1	155363318	155363719	CADM2(dist=229508),TRNAC-ACA(dist=343751)	intergenic	NA	401|266	s15472,s15473,s15474|s15472,s276509,s15474	b1_1_155363318|b2_1_155363318	-	Reference|KAZ11,KAZ12,QK11,QK12,WZM11,WZM12,YUN11,YUN12,KER11,KER12,DOR11,DOR12,FRI11,FRI12,MER11,MER12,ROM11,ROM12,SFK11,SFK12,TEX11,TEX12,CHA11,CHA12,WDU11,WDU12,RMV11,RMV12,WAG11,WAG12
1	155444760	155449909	CADM2(dist=310950),TRNAC-ACA(dist=257561)	intergenic	NA	5149|9700	s15482,s15483,s15484|s15482,s318573,s15484	b1_1_155444760|b2_1_155444760	-	Reference,KAZ11,QK11,QK12,FRI11,FRI12,TEX11,TEX12,WAG11|KAZ12,WZM11,WZM12,YUN11,YUN12,KER11,KER12,DOR11,DOR12,MER11,MER12,ROM11,ROM12,SFK11,SFK12,CHA11,CHA12,WDU11,WDU12,RMV11,RMV12,WAG12
1	155595712	155596489	CADM2(dist=461902),TRNAC-ACA(dist=110981)	intergenic	NA	777|561	s15511,s15512,s15513|s15511,s276508,s15513	b1_1_155595712|b2_1_155595712	-	Reference,KAZ12,QK11,WZM11,WZM12,KER11,KER12,DOR11,DOR12,FRI11,FRI12,MER11,MER12,ROM11,ROM12,SFK11,SFK12,TEX11,CHA11,CHA12,WDU11,WDU12,RMV11,RMV12,WAG12|KAZ11,QK12,YUN11,YUN12,TEX12,WAG11
1	155625299	155626150	CADM2(dist=491489),TRNAC-ACA(dist=81320)	intergenic	NA	851|768	s15520,s15521,s15522|s15520,s375452,s15522	b1_1_155625299|b2_1_155625299	-	Reference,KAZ11,KAZ12,QK11,QK12,WZM11,YUN11,YUN12,MER11,TEX11,RMV11,WAG11,WAG12|WZM12,KER11,KER12,DOR11,DOR12,FRI11,FRI12,MER12,ROM11,ROM12,SFK11,SFK12,TEX12,CHA11,CHA12,WDU11,WDU12,RMV12
1	155648282	155649582	CADM2(dist=514472),TRNAC-ACA(dist=57888)	intergenic	NA	1300|1243	s15525,s15526,s15527|s15525,s397952,s15527	b1_1_155648282|b2_1_155648282	-	Reference,KAZ11,QK12,WZM11,WZM12,YUN11,YUN12,KER11,KER12,FRI11,FRI12,MER11,ROM11,SFK12,TEX11,TEX12,CHA11,CHA12,WDU11,WDU12,RMV11,WAG11|KAZ12,QK11,DOR11,DOR12,MER12,ROM12,SFK11,RMV12,WAG12
1	155669546	155671457	CADM2(dist=535736),TRNAC-ACA(dist=36013)	intergenic	NA	1911|1986	s15530,s15531,s15532,s15533|s15530,s15531,s276506,s15533	b1_1_155669546|b2_1_155669546	-	Reference,WZM12,YUN11,WDU11,WAG11|KAZ11,QK11,WZM11,YUN12,FRI11,FRI12,MER11,TEX11,TEX12,CHA11,RMV11,RMV12,WAG12
1	155671558	155675881	CADM2(dist=537748),TRNAC-ACA(dist=31589)	intergenic	NA	4323|564	s15533,s15534,s15535|s15533,s371461,s15535	b1_1_155671558|b2_1_155671558	-	Reference,KAZ11,KAZ12,QK11,QK12,WZM12,YUN11,YUN12,KER11,KER12,DOR11,DOR12,FRI11,FRI12,MER11,MER12,ROM11,ROM12,SFK11,SFK12,TEX11,TEX12,CHA11,CHA12,WDU11,WDU12,RMV11,RMV12,WAG11,WAG12|WZM11
1	155813334	155815504	TRNAC-ACA(dist=105793),TRNAC-GCA(dist=4941)	intergenic	NA	2170|903	s15557,s15558,s15559|s15557,s276502,s15559	b1_1_155813334|b2_1_155813334	-	Reference,KAZ12,QK11,QK12,WZM11,WZM12,YUN11,YUN12,FRI11,FRI12,MER11,MER12,ROM11,ROM12,SFK11,SFK12,TEX11,TEX12,CHA11,CHA12,WDU12,RMV11,RMV12,WAG11,WAG12|KAZ11,KER11,KER12,DOR11,DOR12,WDU11
1	156647966	156649114	POU1F1(dist=161058),HTR1F(dist=381952)	intergenic	NA	1148|6104	s15641,s15642,s15643|s15641,s405653,s15643	b1_1_156647966|b2_1_156647966	-	Reference,KAZ11,KAZ12,QK11,QK12,WZM11,WZM12,YUN11,YUN12,KER11,KER12,DOR11,DOR12,MER11,MER12,ROM11,ROM12,SFK11,SFK12,TEX11,TEX12,CHA11,CHA12,WDU11,WDU12,RMV11,WAG11,WAG12|FRI11,FRI12,RMV12
1	156701542	156701674	POU1F1(dist=214634),HTR1F(dist=329392)	intergenic	NA	132|5958	s15652,s15653,s15654|s15652,s318587,s15654	b1_1_156701542|b2_1_156701542	-	Reference,KAZ11,YUN11,YUN12,KER11,KER12,DOR12,SFK11,SFK12,WDU11,RMV11|KAZ12,QK11,QK12,WZM11,WZM12,DOR11,FRI11,FRI12,MER11,MER12,ROM11,ROM12,TEX11,TEX12,CHA11,CHA12,WDU12,RMV12,WAG11,WAG12
1	156779448	156779955	POU1F1(dist=292540),HTR1F(dist=251111)	intergenic	NA	507|1082	s15660,s15661,s15662|s15660,s276485,s15662	b1_1_156779448|b2_1_156779448	-	Reference|KAZ11,KAZ12,QK11,QK12,WZM11,WZM12,YUN11,YUN12,KER11,KER12,DOR11,DOR12,FRI11,FRI12,MER11,MER12,ROM11,ROM12,SFK11,SFK12,TEX11,TEX12,CHA11,CHA12,WDU11,WDU12,RMV11,RMV12,WAG11,WAG12
1	157310804	157310927	C1H3orf38(dist=122230),LOC105616630(dist=207454)	intergenic	NA	123|463	s15710,s15711,s15712|s15710,s437822,s15712	b1_1_157310804|b2_1_157310804	-	Reference,KAZ11,KAZ12,QK11,QK12,WZM11,WZM12,YUN11,YUN12,KER11,KER12,DOR11,DOR12,FRI11,FRI12,MER11,MER12,ROM11,ROM12,SFK11,SFK12,TEX11,TEX12,CHA11,WDU11,WDU12,RMV11,RMV12,WAG11,WAG12|CHA12
1	157429206	157429321	C1H3orf38(dist=240632),LOC105616630(dist=89060)	intergenic	NA	115|142	s15723,s15724,s15725|s15723,s318591,s15725	b1_1_157429206|b2_1_157429206	-	Reference,KAZ11,QK11,QK12,WZM11,YUN12,KER11,KER12,DOR11,FRI11,FRI12,MER11,ROM11,TEX11,CHA12,WDU12,RMV11,WAG11,WAG12|KAZ12,WZM12,YUN11,DOR12,MER12,ROM12,SFK11,SFK12,TEX12,CHA11,WDU11,RMV12
1	158404400	158404766	EPHA3	intronic	NA	366|367	s15845,s15846,s15847|s15845,s365731,s15847	b1_1_158404400|b2_1_158404400	-	Reference,KAZ11,KAZ12,QK11,QK12,WZM11,WZM12,YUN11,YUN12,KER11,KER12,DOR11,DOR12,FRI11,FRI12,MER11,MER12,ROM11,ROM12,SFK11,SFK12,TEX11,TEX12,CHA11,CHA12,WDU11,WDU12,RMV11,RMV12,WAG11|WAG12
1	158520588	158521131	EPHA3(dist=1027),PROS1(dist=660273)	intergenic	NA	543|228	s15855,s15856,s15857|s15855,s385808,s15857	b1_1_158520588|b2_1_158520588	-	Reference,KAZ11,KAZ12,QK11,QK12,WZM11,WZM12,YUN11,KER11,KER12,DOR11,DOR12,FRI11,FRI12,MER11,MER12,ROM11,ROM12,SFK11,SFK12,TEX11,TEX12,CHA11,CHA12,WDU11,WDU12,RMV11,RMV12,WAG11,WAG12|YUN12
1	158782579	158783366	EPHA3(dist=263018),PROS1(dist=398038)	intergenic	NA	787|354	s15889,s15890,s15891|s15889,s393932,s15891	b1_1_158782579|b2_1_158782579	-	Reference,KAZ11,KAZ12,QK11,QK12,WZM11,WZM12,YUN11,YUN12,KER11,DOR11,DOR12,FRI11,FRI12,MER11,MER12,ROM11,ROM12,SFK11,SFK12,TEX11,TEX12,CHA11,CHA12,WDU11,WDU12,RMV11,RMV12,WAG11,WAG12|KER12
1	159448136	159448563	NSUN3(dist=40890),LOC114118278(dist=122279)	intergenic	NA	427|788	s15946,s15947,s15948|s15946,s423725,s15948	b1_1_159448136|b2_1_159448136	-	Reference,KAZ11,KAZ12,QK11,QK12,WZM11,WZM12,YUN11,YUN12,KER11,KER12,DOR11,DOR12,FRI11,FRI12,MER11,MER12,ROM12,SFK11,SFK12,TEX11,TEX12,CHA11,CHA12,WDU12,RMV11,RMV12,WAG11,WAG12|ROM11,WDU11
1	159623052	159623374	LOC114118278(dist=50776),TRNAS-GGA(dist=345976)	intergenic	NA	322|626	s15973,s15974,s15975|s15973,s393929,s15975	b1_1_159623052|b2_1_159623052	-	Reference,KAZ11,KAZ12,QK11,QK12,WZM11,WZM12,YUN11,YUN12,KER11,DOR11,DOR12,FRI11,FRI12,MER11,MER12,ROM11,ROM12,SFK11,SFK12,TEX11,TEX12,CHA11,CHA12,WDU11,WDU12,RMV11,RMV12,WAG11,WAG12|KER12
1	159758454	159758933	LOC114118278(dist=186178),TRNAS-GGA(dist=210417)	intergenic	NA	479|1510	s15996,s15997,s15998|s15996,s440322,s15998	b1_1_159758454|b2_1_159758454	-	Reference,KAZ11,KAZ12,QK11,QK12,WZM11,WZM12,YUN11,YUN12,KER11,KER12,DOR11,DOR12,FRI11,FRI12,MER11,MER12,ROM11,ROM12,SFK11,SFK12,TEX11,TEX12,CHA11,CHA12,WDU12,RMV11,RMV12,WAG11,WAG12|WDU11
1	160168740	160168873	TRNAS-GGA(dist=199318),LOC114118284(dist=607423)	intergenic	NA	133|2499	s16036,s16037,s16038|s16036,s276429,s16038	b1_1_160168740|b2_1_160168740	-	Reference,KAZ12,WZM12,KER11,MER12,WAG11,WAG12|KAZ11,QK11,QK12,WZM11,YUN11,YUN12,KER12,DOR11,DOR12,FRI11,FRI12,MER11,ROM11,ROM12,SFK11,SFK12,TEX11,TEX12,CHA11,CHA12,WDU12,RMV11,RMV12
1	160411622	160411804	TRNAS-GGA(dist=442200),LOC114118284(dist=364492)	intergenic	NA	182|166	s16065,s16066,s16067|s16065,s276425,s16067	b1_1_160411622|b2_1_160411622	-	Reference|KAZ11,QK11,QK12,WZM11,WZM12,YUN11,YUN12,KER11,KER12,DOR11,DOR12,FRI11,MER11,MER12,ROM11,ROM12,SFK11,SFK12,TEX11,TEX12,CHA11,CHA12,RMV12,WAG11
1	160637628	160637759	TRNAS-GGA(dist=668206),LOC114118284(dist=138537)	intergenic	NA	131|215	s16093,s16094,s16095|s16093,s318626,s16095	b1_1_160637628|b2_1_160637628	-	Reference,KAZ11,KER11,KER12,FRI11,FRI12,MER11,MER12,ROM12,SFK12,CHA12,WDU11,WDU12,RMV11,RMV12,WAG11,WAG12|KAZ12,QK11,QK12,WZM11,WZM12,YUN11,YUN12,DOR11,DOR12,ROM11,SFK11,TEX11,TEX12,CHA11
1	160757338	160757554	TRNAS-GGA(dist=787916),LOC114118284(dist=18742)	intergenic	NA	216|3353	s16132,s16133,s16134|s16132,s339380,s16134	b1_1_160757338|b2_1_160757338	-	Reference,KAZ11,KAZ12,QK12,WZM11,WZM12,YUN11,YUN12,DOR11,DOR12,TEX11,TEX12|QK11,KER11,KER12,FRI11,FRI12,MER11,MER12,ROM11,ROM12,SFK11,SFK12,CHA11,CHA12,WDU11,WDU12,RMV11,RMV12,WAG11,WAG12
1	160780556	160780673	LOC114118284(dist=2188),EPHA6(dist=1201946)	intergenic	NA	117|167	s16137,s16138,s16139|s16137,s440755,s16139	b1_1_160780556|b2_1_160780556	-	Reference,KAZ11,WZM11,WZM12,YUN11,DOR11,DOR12,FRI11,FRI12,MER11,ROM12,SFK11,TEX11,TEX12,CHA12,WDU11,RMV12,WAG12|KAZ12,QK11,QK12,YUN12,KER11,KER12,MER12,ROM11,SFK12,CHA11,WDU12,RMV11,WAG11
1	160855209	160858265	LOC114118284(dist=76841),EPHA6(dist=1124354)	intergenic	NA	3056|3713	s16145,s16146,s16147|s16145,s339381,s16147	b1_1_160855209|b2_1_160855209	-	Reference,KAZ11,KAZ12,QK12,WZM11,WZM12,YUN11,YUN12,KER11,KER12,DOR11,DOR12,FRI11,FRI12,MER11,MER12,ROM11,ROM12,SFK11,TEX11,TEX12,CHA11,CHA12,WDU11,WDU12,RMV11,RMV12,WAG11,WAG12|QK11,SFK12
1	160862439	160865905	LOC114118284(dist=84071),EPHA6(dist=1116714)	intergenic	NA	3466|1428	s16147,s16148,s16149|s16147,s318636,s16149	b1_1_160862439|b2_1_160862439	-	Reference,KAZ11,WZM11,WZM12,YUN11,YUN12,DOR12,CHA12|KAZ12,QK11,QK12,KER11,KER12,DOR11,FRI11,FRI12,MER11,MER12,ROM11,ROM12,SFK11,SFK12,TEX11,TEX12,CHA11,WDU11,WDU12,RMV11,RMV12,WAG11,WAG12
1	160942255	160943014	LOC114118284(dist=163887),EPHA6(dist=1039605)	intergenic	NA	759|1470	s16166,s16167,s16168|s16166,s276417,s16168	b1_1_160942255|b2_1_160942255	-	Reference,QK11,QK12,WZM11,WZM12,YUN11,YUN12,KER11,KER12,DOR12,FRI11,FRI12,MER11,MER12,ROM12,SFK11,SFK12,CHA12,WDU11,RMV12,WAG12|KAZ11,KAZ12,DOR11,ROM11,TEX11,TEX12,CHA11,WDU11,WDU12,RMV11,WAG11
1	161309133	161309793	LOC114118284(dist=530765),EPHA6(dist=672826)	intergenic	NA	660|1584	s16241,s16242,s16243|s16241,s402850,s16243	b1_1_161309133|b2_1_161309133	-	Reference,KAZ11,KAZ12,QK11,QK12,WZM11,WZM12,YUN11,YUN12,KER11,KER12,DOR11,FRI11,FRI12,MER11,MER12,ROM11,ROM12,SFK11,SFK12,TEX11,TEX12,CHA11,CHA12,WDU11,WDU12,RMV11,RMV12,WAG11,WAG12|DOR12
1	161320854	161321049	LOC114118284(dist=542486),EPHA6(dist=661570)	intergenic	NA	195|184	s16248,s16249,s16250,s16251|s16248,s16249,s276398,s16251	b1_1_161320854|b2_1_161320854	-	Reference|KAZ11,KAZ12,QK11,QK12,WZM11,WZM12,YUN11,YUN12,KER11,KER12,DOR11,DOR12,FRI11,FRI12,MER11,MER12,ROM12,SFK11,SFK12,TEX11,TEX12,CHA11,WDU11,WDU12,RMV11,RMV12,WAG11,WAG12
1	161785666	161786290	LOC114118284(dist=1007298),EPHA6(dist=196329)	intergenic	NA	624|311	s16353,s16354,s16355|s16353,s353619,s16355	b1_1_161785666|b2_1_161785666	-	Reference,KAZ11,KAZ12,QK11,QK12,WZM11,WZM12,YUN11,YUN12,KER11,DOR12,FRI11,FRI12,MER11,MER12,ROM11,ROM12,SFK11,SFK12,TEX11,TEX12,CHA11,CHA12,WDU12,RMV11,RMV12,WAG12|KER12,DOR11,WDU11,WAG11
1	161989303	161989447	EPHA6	intronic	NA	144|504	s16393,s16394,s16395|s16393,s346741,s16395	b1_1_161989303|b2_1_161989303	-	Reference,KAZ11,KAZ12,QK11,WZM11,WZM12,YUN11,YUN12,KER11,KER12,DOR11,DOR12,FRI11,FRI12,MER11,ROM11,ROM12,SFK11,SFK12,TEX11,TEX12,CHA11,CHA12,WDU11,WDU12,RMV11,RMV12,WAG11,WAG12|QK12,MER11
1	162615619	162615760	EPHA6	intronic	NA	141|1547	s16503,s16504,s16505|s16503,s382059,s16505	b1_1_162615619|b2_1_162615619	-	Reference,KAZ11,KAZ12,QK11,QK12,WZM11,WZM12,YUN12,KER11,KER12,DOR11,DOR12,FRI11,FRI12,MER11,MER12,ROM11,ROM12,SFK11,TEX12,CHA11,CHA12,WDU11,WDU12,RMV12,WAG11,WAG12|YUN11,SFK12,TEX11
1	162829402	162833575	EPHA6	intronic	NA	4173|1897	s16543,s16544,s16545|s16543,s276363,s16545	b1_1_162829402|b2_1_162829402	-	Reference,KAZ12,QK11,QK12,WZM11,WZM12,YUN11,YUN12,KER11,KER12,DOR12,FRI11,MER11,ROM11,ROM12,SFK11,SFK12,TEX11,TEX12,CHA11,CHA12,WDU11,WDU12,RMV11,WAG11,WAG12|KAZ11,DOR11,FRI12,MER12,RMV12
1	163257314	163258381	GABRR3(dist=13198),LOC101104359(dist=6809)	intergenic	NA	1067|197	s16584,s16585,s16586|s16584,s435103,s16586	b1_1_163257314|b2_1_163257314	-	Reference,KAZ11,KAZ12,QK11,QK12,WZM11,WZM12,YUN11,YUN12,KER11,KER12,DOR11,DOR12,FRI11,FRI12,MER11,MER12,ROM11,ROM12,SFK11,SFK12,TEX11,CHA11,CHA12,WDU11,WDU12,RMV11,RMV12,WAG11,WAG12|TEX12
1	163551704	163552170	LOC101105374(dist=16930),LOC101105617(dist=16814)	intergenic	NA	466|1096	s16645,s16646,s16647|s16645,s353624,s16647	b1_1_163551704|b2_1_163551704	-	Reference,KAZ11,KAZ12,QK11,QK12,WZM11,YUN11,KER11,KER12,DOR11,DOR12,FRI11,FRI12,MER12,ROM11,ROM12,SFK11,SFK12,TEX11,TEX12,CHA11,CHA12,WDU11,WDU12,RMV11,RMV12,WAG12|WZM12,YUN12,MER11,WAG11
1	163596190	163599956	LOC101105617(dist=26277),LOC101107496(dist=17903)	intergenic	NA	3766|207	s16658,s16659,s16660|s16658,s329697,s16660	b1_1_163596190|b2_1_163596190	-	Reference,KAZ11,KAZ12,QK12,WZM11,WZM12,YUN11,YUN12,KER11,KER12,DOR11,DOR12,FRI11,FRI12,MER11,MER12,ROM11,ROM12,SFK11,SFK12,TEX12,CHA11,WDU11,WDU12,RMV11,RMV12,WAG11,WAG12|QK11,TEX11,CHA12
1	163624453	163627810	LOC101107496(dist=1515),LOC101108018(dist=14528)	intergenic	NA	3357|2434	s16662,s16663,s16664|s16662,s346752,s16664	b1_1_163624453|b2_1_163624453	-	Reference,KAZ11,KAZ12,QK11,YUN11,DOR12,MER12,TEX11,CHA11,CHA12,RMV11|QK12,WZM11,WZM12,YUN12,KER11,KER12,DOR11,FRI11,FRI12,MER11,ROM11,ROM12,SFK11,SFK12,TEX12,WDU11,WDU12,RMV12,WAG11,WAG12
1	163763043	163766692	GPR15(dist=14254),CPOX(dist=31426)	intergenic	NA	3649|3114	s16683,s16684,s16685|s16683,s276336,s16685	b1_1_163763043|b2_1_163763043	-	Reference,KAZ12,QK12,YUN12,KER12,DOR11,DOR12,FRI12,ROM11,SFK11,SFK12,TEX12,CHA11,CHA12,WDU11,WDU12,RMV11,WAG11,WAG12|KAZ11,QK11,WZM11,WZM12,YUN11,KER11,FRI11,MER11,MER12,ROM12,TEX11,RMV12
1	164259942	164260059	DCBLD2(dist=147713),COL8A1(dist=581960)	intergenic	NA	117|3933	s16722,s16723,s16724|s16722,s329700,s16724	b1_1_164259942|b2_1_164259942	-	Reference,KAZ11,KAZ12,QK12,WZM11,YUN11,YUN12,DOR11,DOR12,FRI11,FRI12,MER11,ROM11,ROM12,SFK11,SFK12,TEX11,TEX12,CHA12,WDU11,WDU12,RMV11,RMV12|QK11,WZM12,KER11,KER12,MER12,CHA11,WAG11,WAG12
1	164370136	164370360	DCBLD2(dist=257907),COL8A1(dist=471659)	intergenic	NA	224|8023	s16730,s16731,s16732|s16730,s276329,s16732	b1_1_164370136|b2_1_164370136	-	Reference,QK11,QK12,WZM11,WZM12,YUN11,YUN12,KER11,KER12,DOR11,DOR12,FRI11,FRI12,MER11,MER12,ROM11,ROM12,SFK11,SFK12,TEX11,TEX12,CHA11,CHA12,WDU11,WDU12,RMV11,RMV12,WAG11,WAG12|KAZ11,KAZ12
1	164589661	164589782	DCBLD2(dist=477432),COL8A1(dist=252237)	intergenic	NA	121|166	s16749,s16750,s16751|s16749,s322762,s16751	b1_1_164589661|b2_1_164589661	-	Reference,KAZ11,QK12,WZM12,YUN11,YUN12,KER12,DOR12,FRI12,ROM11,RMV11,WAG11,WAG12|KAZ12,QK11,WZM11,KER11,DOR11,FRI11,MER11,MER12,ROM12,SFK11,SFK12,TEX11,TEX12,CHA11,CHA12,WDU11,WDU12,RMV12
1	164739168	164739287	DCBLD2(dist=626939),COL8A1(dist=102732)	intergenic	NA	119|160	s16755,s16756,s16757|s16755,s402861,s16757	b1_1_164739168|b2_1_164739168	-	Reference,KAZ11,KAZ12,QK11,QK12,WZM11,WZM12,YUN11,YUN12,KER11,KER12,DOR11,MER12,TEX11,TEX12,CHA11,CHA12,WDU11,WDU12,RMV11,RMV12,WAG11,WAG12|DOR12,FRI11,FRI12,MER11,ROM12,SFK11,SFK12
1	165464223	165465469	LOC101108533(dist=21396),TBC1D23(dist=25480)	intergenic	NA	1246|1912	s16801,s16802,s16803,s16804,s16805|s16801,s365755,s16804,s16805	b1_1_165464223|b2_1_165464223	-	Reference,KAZ12,QK11,QK12,WZM12,YUN11,YUN12,KER12,DOR11,DOR12,FRI11,FRI12,MER11,MER12,ROM12,SFK11,SFK12,TEX11,TEX12,CHA11,CHA12,WDU11,WDU12,RMV11,RMV12,WAG11|WZM11,KER11,ROM11,WAG12
1	165557715	165557886	NIT2	intronic	NA	171|212	s16810,s16811,s16812|s16810,s346761,s16812	b1_1_165557715|b2_1_165557715	-	Reference,KAZ11,KAZ12,QK11,WZM11,KER11,KER12,DOR11,FRI11,FRI12,MER11,MER12,ROM11,ROM12,SFK12,TEX12,CHA12,WDU11,WDU12,RMV12,WAG12|QK12,WZM12,YUN11,YUN12,DOR12,SFK11,TEX11,CHA11,RMV11,WAG11
1	166040827	166041074	ADGRG7(dist=7570),TFG(dist=3417)	intergenic	NA	247|115	s16857,s16858,s16859|s16857,s276314,s16859	b1_1_166040827|b2_1_166040827	-	Reference,KAZ12,QK11,WZM11,WZM12,KER12,DOR12,FRI11,FRI12,MER12,ROM11,SFK11,SFK12,TEX11,TEX12,CHA11,WDU11,WDU12,RMV12,WAG11,WAG12|KAZ11,QK12,YUN11,YUN12,KER11,DOR11,MER11,ROM12,CHA12,RMV11
1	166089996	166090119	LOC101108803	intronic	NA	123|693	s16859,s16860,s16861|s16859,s390171,s16861	b1_1_166089996|b2_1_166089996	-	Reference,KAZ11,KAZ12,QK11,QK12,WZM11,WZM12,YUN11,YUN12,KER12,DOR12,FRI11,FRI12,MER12,ROM11,ROM12,SFK11,SFK12,TEX11,CHA11,CHA12,WDU11,WDU12,RMV11,RMV12,WAG11,WAG12|KER11,DOR11,MER11,TEX12
1	167584425	167584602	NFKBIZ(dist=476072),ZPLD1(dist=218815)	intergenic	NA	177|136	s17008,s17009,s17010|s17008,s375426,s17010	b1_1_167584425|b2_1_167584425	-	Reference,KAZ12,YUN11,KER11,DOR11,DOR12,FRI11,FRI12,MER11,MER12,ROM11,ROM12,SFK11,SFK12,TEX11,TEX12,CHA12,WDU11,WDU12,RMV12|KAZ11,QK12,WZM11,WZM12,YUN12,KER12,CHA11,RMV11,WAG11,WAG12
1	167638572	167639670	NFKBIZ(dist=530219),ZPLD1(dist=163747)	intergenic	NA	1098|8833	s17013,s17014,s17015|s17013,s353631,s17015	b1_1_167638572|b2_1_167638572	-	Reference,KAZ11,KAZ12,QK12,WZM12,YUN11,YUN12,KER11,KER12,DOR11,DOR12,FRI11,FRI12,MER11,MER12,ROM11,ROM12,SFK11,SFK12,TEX11,TEX12,CHA12,WDU11,WDU12,RMV12|WZM11,CHA11,RMV11,WAG11,WAG12
1	168217362	168217539	ZPLD1(dist=364160),TRNAW-CCA(dist=472452)	intergenic	NA	177|1056	s17096,s17097,s17098|s17096,s339400,s17098	b1_1_168217362|b2_1_168217362	-	Reference,KAZ11,KAZ12,QK12,WZM11,KER11,DOR11,DOR12,FRI12,MER11,MER12,ROM12,SFK11,SFK12,TEX11,TEX12,WDU11,WDU12,RMV11,RMV12,WAG11,WAG12|QK11,WZM12,YUN11,YUN12,KER12,FRI11,ROM11,CHA11,CHA12
1	168505531	168505838	ZPLD1(dist=652329),TRNAW-CCA(dist=184153)	intergenic	NA	307|140	s17130,s17131,s17132|s17130,s306119,s17132	b1_1_168505531|b2_1_168505531	-	Reference,KAZ11,QK11,QK12,YUN12,MER11,MER12,ROM11,ROM12,TEX12,CHA12,WDU12,RMV11,RMV12,WAG11,WAG12|KAZ12,WZM11,WZM12,YUN11,KER11,KER12,DOR11,DOR12,FRI11,FRI12,SFK11,SFK12,TEX11,CHA11,WDU11
1	168889473	168889645	TRNAC-GCA(dist=89019),TRNAF-GAA(dist=963932)	intergenic	NA	172|607	s17187,s17188,s17189|s17187,s426393,s17189	b1_1_168889473|b2_1_168889473	-	Reference,KAZ11,KAZ12,QK11,QK12,WZM11,WZM12,YUN11,YUN12,KER11,KER12,DOR11,DOR12,FRI11,FRI12,MER11,MER12,ROM11,SFK11,SFK12,TEX11,TEX12,CHA11,CHA12,WDU12,RMV11,RMV12,WAG11,WAG12|ROM12,WDU11
1	168921959	168922489	TRNAC-GCA(dist=121505),TRNAF-GAA(dist=931088)	intergenic	NA	530|465	s17194,s17195,s17196|s17194,s365766,s17196	b1_1_168921959|b2_1_168921959	-	Reference,KAZ11,KAZ12,QK11,QK12,WZM12,YUN11,YUN12,KER11,KER12,DOR11,DOR12,FRI11,FRI12,MER11,MER12,ROM12,SFK11,SFK12,TEX11,TEX12,CHA11,CHA12,WDU11,WDU12,RMV11,RMV12,WAG11|WZM11,ROM11,WAG12
1	169188037	169188152	TRNAC-GCA(dist=387583),TRNAF-GAA(dist=665425)	intergenic	NA	115|171	s17234,s17235,s17236|s17234,s435838,s17236	b1_1_169188037|b2_1_169188037	-	Reference,KAZ11,KAZ12,QK11,QK12,WZM11,WZM12,YUN11,YUN12,KER11,KER12,DOR11,DOR12,FRI11,FRI12,MER12,ROM11,ROM12,SFK11,SFK12,TEX11,TEX12,CHA12,WDU11,WDU12,RMV11,RMV12,WAG11,WAG12|CHA11
1	169242119	169242656	TRNAC-GCA(dist=441665),TRNAF-GAA(dist=610921)	intergenic	NA	537|789	s17246,s17247,s17248|s17246,s17247,s418442,s17248	b1_1_169242119|b2_1_169242119	-	Reference,KAZ11,KAZ12,QK11,QK12,WZM11,WZM12,YUN11,YUN12,KER11,KER12,DOR11,DOR12,FRI11,FRI12,MER12,ROM11,ROM12,SFK11,SFK12,TEX11,TEX12,CHA12,WDU11,WDU12,RMV12,WAG11,WAG12|RMV11
1	169663809	169666544	TRNAC-GCA(dist=863355),TRNAF-GAA(dist=187033)	intergenic	NA	2735|2792	s17318,s17319,s17320,s17321|s17318,s339391,s17319,s17320,s17321	b1_1_169663809|b2_1_169663809	-	Reference,KAZ11,KAZ12,QK12,YUN11,YUN12,KER12,SFK11,SFK12,TEX11,CHA11,RMV11|QK11,WZM11,WZM12,DOR11,DOR12,FRI11,FRI12,MER11,MER12,ROM12,TEX12,CHA12,WAG11,WAG12
1	169874227	169874610	TRNAF-GAA(dist=20578),ALCAM(dist=1106804)	intergenic	NA	383|235	s17340,s17341,s17342|s17340,s344337,s17342	b1_1_169874227|b2_1_169874227	-	Reference,KAZ11,KAZ12,QK11,WZM11,WZM12,YUN11,KER11,KER12,DOR11,DOR12,FRI12,MER11,MER12,ROM11,ROM12,SFK11,SFK12,TEX12,CHA11,CHA12,WDU11,WDU12,RMV11,RMV12,WAG11|QK12,YUN12,FRI11,TEX11,WAG12
1	170070242	170070491	TRNAF-GAA(dist=216593),ALCAM(dist=910923)	intergenic	NA	249|146	s17358,s17359,s17360|s17358,s292491,s17360	b1_1_170070242|b2_1_170070242	-	Reference,KAZ12,QK11,QK12,WZM11,WZM12,YUN11,YUN12,KER11,KER12,DOR11,DOR12,FRI12,MER11,ROM12,SFK11,SFK12,TEX11,TEX12,CHA11,CHA12,WDU12,RMV11,RMV12,WAG11|KAZ11,FRI11,MER12,ROM11,WDU11,WAG12
1	170404983	170405090	TRNAF-GAA(dist=551334),ALCAM(dist=576324)	intergenic	NA	107|1407	s17405,s17406,s17407|s17405,s336356,s17407	b1_1_170404983|b2_1_170404983	-	Reference,KAZ11,KAZ12,QK12,WZM11,YUN11,KER11,KER12,DOR11,DOR12,FRI11,FRI12,MER11,ROM11,ROM12,SFK11,SFK12,TEX11,CHA11,CHA12,WDU12,RMV11,RMV12,WAG12|QK11,WZM12,YUN12,MER12,TEX12,WDU11,WAG11
1	170909858	170910241	TRNAF-GAA(dist=1056209),ALCAM(dist=71173)	intergenic	NA	383|312	s17481,s17482,s17483|s17481,s292503,s17483	b1_1_170909858|b2_1_170909858	-	Reference,RMV11|KAZ11,KAZ12,QK11,QK12,WZM11,WZM12,YUN11,YUN12,KER11,KER12,DOR11,DOR12,FRI11,FRI12,MER11,MER12,ROM11,ROM12,SFK11,SFK12,TEX11,TEX12,CHA11,CHA12,WDU11,WDU12,RMV12,WAG11,WAG12
1	171742529	171742980	CBLB(dist=218501),LOC101114658(dist=322462)	intergenic	NA	451|632	s17545,s17546,s17547|s17545,s306149,s17547	b1_1_171742529|b2_1_171742529	-	Reference,KAZ11,QK11,QK12,WZM11,WZM12,YUN11,KER11,KER12,DOR12,MER11,MER12,ROM11,ROM12,SFK11,SFK12,TEX11,CHA11,CHA12,WDU12,WAG12|KAZ12,YUN12,DOR11,FRI11,FRI12,TEX12,WDU11,RMV11,RMV12,WAG11
1	171748429	171749285	CBLB(dist=224401),LOC101114658(dist=316157)	intergenic	NA	856|986	s17547,s17548,s17549|s17547,s383480,s17549	b1_1_171748429|b2_1_171748429	-	Reference,KAZ11,KAZ12,QK11,QK12,WZM11,WZM12,YUN12,KER11,KER12,DOR11,DOR12,FRI11,FRI12,MER12,ROM11,ROM12,SFK11,SFK12,TEX12,CHA11,CHA12,WDU11,WDU12,RMV11,RMV12,WAG11,WAG12|YUN11,MER11,TEX11
1	171835347	171835459	CBLB(dist=311319),LOC101114658(dist=229983)	intergenic	NA	112|183	s17551,s17552,s17553|s17551,s383481,s17553	b1_1_171835347|b2_1_171835347	-	Reference,KAZ11,KAZ12,QK11,QK12,WZM11,WZM12,YUN12,KER11,KER12,DOR11,DOR12,FRI11,FRI12,MER11,MER12,ROM11,ROM12,SFK11,SFK12,TEX11,TEX12,CHA11,CHA12,WDU11,WDU12,RMV11,RMV12,WAG11,WAG12|YUN11
1	172077288	172077915	LOC101114658(dist=11304),TRNAS-GGA(dist=210267)	intergenic	NA	627|1926	s17578,s17579,s17580|s17578,s375415,s17580	b1_1_172077288|b2_1_172077288	-	Reference,KAZ11,KAZ12,QK11,QK12,WZM11,YUN12,KER11,KER12,DOR11,DOR12,FRI11,FRI12,MER11,MER12,ROM11,ROM12,SFK11,SFK12,CHA11,CHA12,WDU11,WAG11,WAG12|WZM12,YUN11,TEX11,TEX12,WDU12,RMV11,RMV12
1	172101499	172102452	LOC101114658(dist=35515),TRNAS-GGA(dist=185730)	intergenic	NA	953|341	s17581,s17582,s17583,s17584|s17581,s375414,s17584	b1_1_172101499|b2_1_172101499	-	Reference,KAZ11,KAZ12,QK11,WZM11,KER11,KER12,DOR11,FRI11,FRI12,MER12,ROM12,CHA11,CHA12,WDU12,WAG11,WAG12|WZM12,YUN11,YUN12,DOR12,MER11,ROM11,SFK11,SFK12,TEX11,TEX12,WDU11,RMV11,RMV12
1	173318503	173318646	BBX	intronic	NA	143|372	s17688,s17689,s17690|s17688,s438895,s17690	b1_1_173318503|b2_1_173318503	-	Reference,KAZ11,KAZ12,QK11,QK12,WZM11,WZM12,YUN11,YUN12,KER11,KER12,DOR11,DOR12,FRI11,FRI12,MER11,MER12,ROM11,ROM12,SFK11,SFK12,TEX11,TEX12,CHA11,CHA12,RMV11,RMV12,WAG11,WAG12|WDU11,WDU12
1	173702325	173702898	BBX(dist=213985),CD47(dist=64093)	intergenic	NA	573|687	s17712,s17713,s17714|s17712,s397994,s17714	b1_1_173702325|b2_1_173702325	-	Reference,KAZ11,KAZ12,QK11,QK12,WZM11,WZM12,YUN11,YUN12,KER11,KER12,DOR12,FRI11,FRI12,MER11,MER12,TEX11,TEX12,CHA12,WDU11,WDU12,RMV11,RMV12,WAG11,WAG12|DOR11,ROM11,SFK11,SFK12,CHA11
1	175072033	175072413	C1H3orf85(dist=127263),DPPA2(dist=11248)	intergenic	NA	380|328	s17829,s17830,s17831|s17829,s335818,s17831	b1_1_175072033|b2_1_175072033	-	Reference,KAZ11,KAZ12,WZM11,WZM12,YUN11,YUN12,KER11,KER12,DOR11,DOR12,FRI11,FRI12,MER12,ROM11,ROM12,SFK11,SFK12,TEX11,TEX12,CHA11,CHA12,WDU11,WDU12,RMV11,RMV12,WAG11,WAG12|QK11,QK12
1	175240668	175241392	TRNAC-ACA(dist=20174),LOC101113722(dist=1491068)	intergenic	NA	724|880	s17842,s17843,s17844|s17842,s418436,s17844	b1_1_175240668|b2_1_175240668	-	Reference,KAZ11,KAZ12,QK11,QK12,WZM11,WZM12,YUN11,YUN12,KER11,KER12,DOR11,DOR12,FRI11,FRI12,MER12,ROM11,ROM12,SFK11,SFK12,TEX11,TEX12,CHA11,CHA12,WDU11,WDU12,WAG11,WAG12|MER12,RMV11,RMV12
1	175367295	175367455	TRNAC-ACA(dist=146801),LOC101113722(dist=1365005)	intergenic	NA	160|160	s17852,s17853,s17854|s17852,s423178,s17854	b1_1_175367295|b2_1_175367295	-	Reference,KAZ11,KAZ12,QK11,QK12,WZM11,WZM12,YUN11,YUN12,KER11,KER12,DOR11,DOR12,FRI11,FRI12,MER11,MER12,ROM12,SFK11,SFK12,TEX11,TEX12,CHA11,CHA12,WDU11,WDU12,RMV11,RMV12,WAG11,WAG12|ROM11
1	175442885	175443619	TRNAC-ACA(dist=222391),LOC101113722(dist=1288841)	intergenic	NA	734|1317	s17861,s17862,s17863|s17861,s367307,s17863	b1_1_175442885|b2_1_175442885	-	Reference,KAZ11,KAZ12,QK11,QK12,WZM11,WZM12,YUN11,YUN12,KER11,KER12,DOR11,DOR12,FRI11,FRI12,MER11,MER12,ROM11,ROM12,SFK11,SFK12,TEX11,TEX12,CHA11,CHA12,WDU11,WDU12,RMV11,RMV12,WAG11|WAG12
1	175476637	175478835	TRNAC-ACA(dist=256143),LOC101113722(dist=1253625)	intergenic	NA	2198|552	s17864,s17865,s17866|s17864,s418435,s17866	b1_1_175476637|b2_1_175476637	-	Reference,KAZ11,KAZ12,QK11,QK12,WZM11,WZM12,YUN11,YUN12,KER11,KER12,DOR11,DOR12,FRI11,FRI12,MER11,MER12,ROM11,TEX11,TEX12,CHA11,CHA12,WAG11,WAG12|ROM12,SFK11,SFK12,WDU11,WDU12,RMV11,RMV12
1	175578983	175579097	TRNAC-ACA(dist=358489),LOC101113722(dist=1153363)	intergenic	NA	114|2421	s17874,s17875,s17876|s17874,s385380,s17876	b1_1_175578983|b2_1_175578983	-	Reference,KAZ11,KAZ12,QK11,QK12,WZM11,WZM12,YUN11,KER11,KER12,DOR11,DOR12,FRI12,MER11,MER12,ROM11,TEX11,TEX12,CHA12,WAG11,WAG12|YUN12,FRI11,ROM12,SFK11,SFK12,CHA11,WDU11,WDU12,RMV11,RMV12
1	176184316	176191715	TRNAC-ACA(dist=963822),LOC101113722(dist=540745)	intergenic	NA	7399|244	s17954,s17955,s17956|s17954,s367305,s17956	b1_1_176184316|b2_1_176184316	-	Reference,KAZ11,KAZ12,QK11,QK12,WZM11,WZM12,YUN11,YUN12,KER11,KER12,DOR11,DOR12,FRI11,FRI12,MER11,MER12,ROM11,ROM12,SFK11,SFK12,TEX11,TEX12,CHA11,CHA12,WDU11,WDU12,RMV11,RMV12,WAG11|WAG12
1	176241359	176241749	TRNAC-ACA(dist=1020865),LOC101113722(dist=490711)	intergenic	NA	390|120	s17959,s17960,s17961|s17959,s367304,s17961	b1_1_176241359|b2_1_176241359	-	Reference,KAZ11,KAZ12,QK11,QK12,WZM11,YUN11,YUN12,KER11,KER12,DOR11,FRI11,FRI12,MER11,MER12,ROM11,ROM12,SFK11,SFK12,TEX11,CHA12,WDU11,WDU12,WAG11|WZM12,DOR12,TEX12,CHA11,RMV11,RMV12,WAG12
1	176548473	176548804	TRNAC-ACA(dist=1327979),LOC101113722(dist=183656)	intergenic	NA	331|685	s17988,s17989,s17990|s17988,s391114,s17990	b1_1_176548473|b2_1_176548473	-	Reference,KAZ11,KAZ12,QK11,QK12,WZM11,WZM12,YUN11,YUN12,KER12,FRI11,FRI12,MER11,ROM11,ROM12,SFK11,SFK12,TEX12,CHA11,CHA12,WDU11,WDU12,RMV11,RMV12,WAG11,WAG12|KER11,DOR11,DOR12,MER12,TEX11
1	176646047	176646632	TRNAC-ACA(dist=1425553),LOC101113722(dist=85828)	intergenic	NA	585|512	s17999,s18000,s18001|s17999,s409362,s18001	b1_1_176646047|b2_1_176646047	-	Reference,KAZ11,KAZ12,QK11,QK12,WZM11,WZM12,YUN11,YUN12,KER11,KER12,DOR11,DOR12,FRI11,MER12,ROM11,ROM12,SFK11,SFK12,TEX12,CHA12,WDU11,WDU12,RMV11,RMV12,WAG11,WAG12|FRI12,MER11,TEX11,CHA11
1	176678296	176678476	TRNAC-ACA(dist=1457802),LOC101113722(dist=53984)	intergenic	NA	180|170	s18003,s18004,s18005|s18003,s391111,s18005	b1_1_176678296|b2_1_176678296	-	Reference,KAZ11,KAZ12,QK11,QK12,WZM11,WZM12,YUN11,YUN12,KER12,DOR11,DOR12,FRI11,FRI12,MER11,MER12,ROM11,ROM12,SFK11,SFK12,TEX11,TEX12,CHA11,CHA12,WDU11,WDU12,RMV11,RMV12,WAG11,WAG12|KER11
1	176827812	176827915	TRNAS-GGA(dist=35329),NECTIN3(dist=52057)	intergenic	NA	103|1690	s18014,s18015,s18016|s18014,s292579,s18016	b1_1_176827812|b2_1_176827812	-	Reference,KAZ12,QK11,WZM11,WZM12,KER11,KER12,DOR11,DOR12,FRI11,FRI12,MER11,TEX11,WDU11,WDU12,RMV11,RMV12,WAG12|KAZ11,QK12,YUN11,YUN12,MER12,ROM11,ROM12,SFK11,SFK12,TEX12,CHA11,CHA12,WAG11
1	176936349	176936517	NECTIN3	intronic	NA	168|142	s18023,s18024,s18025|s18023,s292580,s18025	b1_1_176936349|b2_1_176936349	-	Reference,WAG11,WAG12|KAZ11,KAZ12,QK11,QK12,WZM11,WZM12,YUN11,YUN12,KER11,KER12,DOR11,DOR12,FRI11,FRI12,MER11,MER12,ROM11,ROM12,SFK11,SFK12,TEX11,TEX12,CHA11,CHA12,WDU11,WDU12,RMV11,RMV12
1	179093265	179093528	SPICE1	intronic	NA	263|453	s18153,s18154,s18155|s18153,s292602,s18155	b1_1_179093265|b2_1_179093265	-	Reference,KAZ12,QK11,QK12,WZM12,YUN11,YUN12,KER11,KER12,FRI11,FRI12,MER11,MER12,ROM11,ROM12,SFK11,SFK12,TEX12,CHA11,CHA12,WDU11,WDU12,RMV11,RMV12,WAG11|KAZ11,DOR11,DOR12,TEX11,WAG12
1	181020392	181020839	ZBTB20(dist=261836),GAP43(dist=192024)	intergenic	NA	447|1918	s18268,s18269,s18270|s18268,s439136,s18270	b1_1_181020392|b2_1_181020392	-	Reference,KAZ11,KAZ12,QK11,QK12,WZM11,WZM12,YUN11,YUN12,KER11,KER12,DOR11,DOR12,FRI11,FRI12,MER11,MER12,ROM11,ROM12,SFK11,SFK12,TEX11,TEX12,CHA11,CHA12,WDU12,RMV11,RMV12,WAG11,WAG12|WDU11
1	181032460	181035154	ZBTB20(dist=273904),GAP43(dist=177709)	intergenic	NA	2694|2630	s18272,s18273,s18274|s18272,s398003,s18274	b1_1_181032460|b2_1_181032460	-	Reference,KAZ11,KAZ12,QK11,QK12,WZM11,WZM12,YUN11,YUN12,KER11,KER12,FRI11,FRI12,MER11,ROM11,SFK11,SFK12,TEX11,TEX12,WDU11,WDU12,RMV11,RMV12,WAG11,WAG12|DOR11,DOR12,MER12,ROM12,CHA11,CHA12
1	181628826	181629046	LOC101104028	intronic	NA	220|129	s18321,s18322,s18323|s18321,s300272,s18323	b1_1_181628826|b2_1_181628826	-	Reference|KAZ11,KAZ12,QK11,QK12,WZM11,WZM12,YUN11,YUN12,KER11,KER12,DOR11,DOR12,FRI11,FRI12,MER11,MER12,ROM11,ROM12,SFK11,SFK12,TEX11,TEX12,CHA11,CHA12,WDU11,WDU12,RMV11,RMV12,WAG11,WAG12
1	182468670	182468838	LOC101104028(dist=369418),LOC101117300(dist=189228)	intergenic	NA	168|217	s18398,s18399,s18400|s18398,s383495,s18400	b1_1_182468670|b2_1_182468670	-	Reference,MER11,WAG12|KAZ11,KAZ12,QK11,QK12,WZM11,WZM12,YUN11,YUN12,KER11,KER12,DOR11,DOR12,FRI11,FRI12,MER12,ROM11,ROM12,SFK11,SFK12,TEX11,TEX12,CHA11,CHA12,WDU11,WDU12,RMV11,RMV12,WAG11
1	183167486	183167631	LOC101117300(dist=508096),LOC101120489(dist=806919)	intergenic	NA	145|218	s18484,s18485,s18486,s18487|s18484,s18485,s335667,s18486,s18487	b1_1_183167486|b2_1_183167486	-	Reference,KAZ11,KAZ12,WZM12,YUN11,YUN12,KER11,KER12,FRI11,FRI12,MER11,ROM12,SFK11,SFK12,TEX11,CHA11,CHA12,WDU11,WDU12,RMV11,RMV12,WAG11,WAG12|QK11,WZM11,DOR11,DOR12,MER12,ROM11,TEX12
1	183786771	183787104	LOC101117300(dist=1127381),LOC101120489(dist=187446)	intergenic	NA	333|348	s18544,s18545,s18546,s18547|s18544,s297726,s18546,s18547	b1_1_183786771|b2_1_183786771	-	Reference|KAZ11,KAZ12,QK11,QK12,WZM11,YUN11,YUN12,KER11,DOR11,DOR12,FRI11,FRI12,MER12,ROM11,ROM12,SFK11,SFK12,TEX11,TEX12,CHA11,CHA12,WDU12,WAG11,WAG12
1	184448998	184449120	LOC101120489(dist=473104),IGSF11(dist=182837)	intergenic	NA	122|149	s18622,s18623,s18624|s18622,s372087,s18624	b1_1_184448998|b2_1_184448998	-	Reference,KAZ11,QK11,QK12,WZM12,YUN11,DOR12,MER11,ROM11,SFK11,TEX11,WDU12,RMV11,RMV12,WAG11,WAG12|KAZ12,WZM11,YUN12,KER11,KER12,DOR11,FRI11,FRI12,MER12,ROM12,SFK12,TEX12,CHA11,CHA12,WDU11
1	184877790	184878220	UPK1B	intronic	NA	430|124	s18654,s18655,s18656|s18654,s331826,s18656	b1_1_184877790|b2_1_184877790	-	Reference,KAZ11,KAZ12,WZM11,YUN11,KER12,DOR11,DOR12,FRI12,MER12,SFK11,SFK12,TEX11,TEX12,CHA11,CHA12,WDU11,WDU12,RMV11,RMV12,WAG11|QK11,QK12,WZM12,YUN12,KER11,FRI11,MER11,ROM11,ROM12,WAG12
1	185999690	186000585	FSTL1	intronic	NA	895|968	s18722,s18723,s18724|s18722,s391097,s18724	b1_1_185999690|b2_1_185999690	-	Reference,KAZ11,KAZ12,QK11,QK12,WZM11,WZM12,YUN11,YUN12,KER12,DOR11,DOR12,FRI11,FRI12,MER11,MER12,ROM11,ROM12,SFK11,SFK12,TEX11,TEX12,CHA11,CHA12,WDU11,WDU12,RMV11,RMV12,WAG11,WAG12|KER11
1	186497908	186498407	STXBP5L	intronic	NA	499|579	s18754,s18755,s18756|s18754,s297704,s18756	b1_1_186497908|b2_1_186497908	-	Reference|KAZ11,KAZ12,QK11,QK12,WZM11,WZM12,YUN11,YUN12,KER11,KER12,DOR11,DOR12,FRI11,FRI12,MER11,MER12,ROM11,ROM12,SFK11,SFK12,TEX11,TEX12,CHA11,CHA12,WDU11,WDU12,RMV11,RMV12,WAG11,WAG12
1	186534106	186534255	STXBP5L	intronic	NA	149|292	s18766,s18767,s18768|s18766,s297702,s18768	b1_1_186534106|b2_1_186534106	-	Reference,KAZ12,QK11,QK12,WZM11,WZM12,YUN11,YUN12,KER12,DOR11,DOR12,FRI11,FRI12,MER11,MER12,ROM11,ROM12,SFK11,SFK12,TEX11,TEX12,CHA11,WDU11,WDU12,RMV11,RMV12,WAG12|KAZ11,KER11,CHA12,WAG11
1	186814355	186816139	POLQ	intronic	NA	1784|344	s18790,s18791,s18792|s18790,s297699,s18792	b1_1_186814355|b2_1_186814355	-	Reference,KAZ12,QK11,QK12,WZM11,WZM12,YUN11,YUN12,KER11,KER12,DOR12,FRI11,FRI12,MER12,ROM11,ROM12,SFK11,SFK12,TEX11,TEX12,CHA11,CHA12,WDU11,WDU12,RMV11,RMV12,WAG11,WAG12|KAZ11,DOR11,MER11
1	187071624	187073375	GOLGB1	intronic	NA	1751|880	s18801,s18802,s18803|s18801,s331839,s18803	b1_1_187071624|b2_1_187071624	-	Reference,KAZ11,KAZ12,WZM11,WZM12,KER12,FRI12,SFK12,TEX12|QK11,QK12,YUN11,YUN12,KER11,DOR11,DOR12,FRI11,MER11,MER12,ROM11,ROM12,SFK11,TEX11,CHA11,CHA12,WDU11,WDU12,RMV11,RMV12,WAG11,WAG12
1	188470168	188472139	SEC22A	intronic	NA	1971|228	s18885,s18886,s18887|s18885,s398010,s18887	b1_1_188470168|b2_1_188470168	-	Reference,KAZ11,KAZ12,QK11,QK12,WZM11,WZM12,YUN11,YUN12,KER11,KER12,FRI11,FRI12,MER11,MER12,ROM11,ROM12,SFK11,TEX11,TEX12,CHA11,CHA12,WDU11,WDU12,WAG11,WAG12|DOR11,DOR12,SFK12,RMV11,RMV12
1	190636640	190636780	ZNF148	intronic	NA	140|138	s19023,s19024,s19025|s19023,s441070,s19025	b1_1_190636640|b2_1_190636640	-	Reference,KAZ11,KAZ12,QK11,QK12,WZM11,WZM12,YUN11,YUN12,KER11,KER12,DOR11,DOR12,FRI11,FRI12,MER11,MER12,ROM11,ROM12,SFK11,SFK12,TEX11,TEX12,CHA11,CHA12,WDU11,RMV11,RMV12,WAG11,WAG12|WDU12
1	190905005	190905181	OSBPL11	intronic	NA	176|1722	s19037,s19038,s19039|s19037,s306232,s19039	b1_1_190905005|b2_1_190905005	-	Reference,KAZ11,QK11,QK12,WZM11,YUN11,KER11,KER12,DOR11,DOR12,FRI11,FRI12,MER11,MER12,ROM12,SFK12,TEX11,TEX12,CHA11,CHA12,WDU11,WDU12,RMV11,RMV12,WAG11,WAG12|KAZ12,WZM12,YUN12,ROM11,SFK11
1	191405778	191407508	MUC4(dist=25797),TNK2(dist=28756)	intergenic	NA	1730|185	s19060,s19061,s19062|s19060,s344387,s19062	b1_1_191405778|b2_1_191405778	-	Reference,KAZ11,KAZ12,QK11,WZM11,WZM12,YUN12,DOR11,DOR12,FRI11,FRI12,MER11,ROM11,ROM12,SFK11,SFK12,TEX11,TEX12,CHA11,CHA12,WDU11,WDU12,RMV11,RMV12,WAG12|QK12,YUN11,KER11,KER12,MER12,WAG11
1	193143287	193144347	XXYLT1	intronic	NA	1060|939	s19160,s19161,s19162|s19160,s302778,s19162	b1_1_193143287|b2_1_193143287	-	Reference,KAZ12,QK11,QK12,WZM12,YUN11,KER11,KER12,DOR12,FRI11,FRI12,MER11,MER12,ROM11,ROM12,SFK11,SFK12,TEX11,TEX12,CHA11,CHA12,WDU11,RMV11,RMV12,WAG11,WAG12|KAZ11,WZM11,YUN12,DOR11
1	193390676	193393007	XXYLT1(dist=68601),FAM43A(dist=291944)	intergenic	NA	2331|4558	s19177,s19178,s19179|s19177,s396628,s19179	b1_1_193390676|b2_1_193390676	-	Reference,KAZ11,KAZ12,QK11,QK12,WZM11,WZM12,YUN11,YUN12,KER11,KER12,DOR12,FRI11,FRI12,MER11,MER12,ROM11,ROM12,SFK11,SFK12,TEX11,TEX12,WDU11,WDU12,RMV11,RMV12,WAG11,WAG12|DOR11,CHA11
1	193466784	193467033	XXYLT1(dist=144709),FAM43A(dist=217918)	intergenic	NA	249|560	s19189,s19190,s19191|s19189,s304309,s19191	b1_1_193466784|b2_1_193466784	-	Reference,KAZ12,QK11,QK12,YUN11,KER12,DOR12,FRI11,MER11,MER12,ROM12,SFK12,WDU11,WDU12,RMV12|KAZ11,WZM11,WZM12,YUN12,KER11,DOR11,FRI12,ROM11,SFK11,TEX11,TEX12,CHA11,RMV11,WAG11,WAG12
1	194446743	194446955	HES1(dist=260726),OPA1(dist=141388)	intergenic	NA	212|286	s19229,s19230,s19231|s19229,s388317,s19231	b1_1_194446743|b2_1_194446743	-	Reference,KAZ11,KAZ12,QK11,QK12,WZM11,WZM12,YUN11,FRI11,FRI12,MER11,MER12,ROM12,SFK11,SFK12,CHA11,RMV11,RMV12,WAG11,WAG12|YUN12,KER11,KER12,DOR11,DOR12,ROM11,TEX11,TEX12,CHA12,WDU11,WDU12
1	196134003	196134395	FGF12(dist=14776),TRNAC-ACA(dist=102912)	intergenic	NA	392|284	s19363,s19364,s19365|s19363,s435853,s19365	b1_1_196134003|b2_1_196134003	-	Reference,KAZ11,KAZ12,QK11,QK12,WZM11,WZM12,YUN11,YUN12,KER11,KER12,DOR11,DOR12,FRI11,FRI12,MER11,MER12,ROM11,ROM12,SFK11,SFK12,TEX11,TEX12,CHA12,WDU11,WDU12,RMV11,RMV12,WAG11,WAG12|CHA11
1	196352005	196352119	TRNAC-ACA(dist=114627),LOC101107565(dist=126621)	intergenic	NA	114|242	s19394,s19395,s19396|s19394,s306253,s19396	b1_1_196352005|b2_1_196352005	-	Reference,KAZ11,QK11,QK12,WZM11,WZM12,YUN12,KER12,DOR11,DOR12,FRI12,MER11,MER12,ROM11,ROM12,SFK11,SFK12,TEX11,TEX12,CHA11,RMV11,RMV12,WAG11|KAZ12,YUN11,KER11,FRI11,CHA12,WDU11,WDU12,WAG12
1	196506720	196510740	LOC105602566	exonic	NA	4020|371	s19407,s19408,s19409|s19407,s349683,s19409	b1_1_196506720|b2_1_196506720	-	Reference,KAZ11,KAZ12,QK11,WZM11,WZM12,KER11,KER12,DOR11,FRI11,FRI12,MER11,ROM11,ROM12,SFK11,SFK12,TEX11,TEX12,CHA11,CHA12,WDU11,WDU12,RMV12,WAG12|QK12,YUN11,YUN12,DOR12,MER12,RMV11,WAG11
1	196577447	196580077	LOC105602566(dist=67305),CCDC50(dist=211558)	intergenic	NA	2630|262	s19422,s19423,s19424|s19422,s292711,s19424	b1_1_196577447|b2_1_196577447	-	Reference,QK12,WZM12,YUN11,DOR12,FRI12,ROM12,SFK11,TEX11,TEX12,RMV11,WAG12|KAZ11,KAZ12,QK11,WZM11,YUN12,KER11,KER12,DOR11,FRI11,MER11,MER12,ROM11,SFK12,CHA11,CHA12,WDU11,WDU12,RMV12,WAG11
1	196706500	196706630	LOC105602566(dist=196358),CCDC50(dist=85005)	intergenic	NA	130|357	s19440,s19441,s19442|s19440,s306254,s19442	b1_1_196706500|b2_1_196706500	-	Reference,KAZ11,QK11,WZM11,YUN11,YUN12,DOR11,FRI11,FRI12,MER11,MER12,ROM11,ROM12,SFK11,SFK12,TEX11,TEX12,CHA11,CHA12,RMV12|KAZ12,QK12,WZM12,KER11,KER12,DOR12,WDU11,WDU12,RMV11,WAG11,WAG12
1	197983530	197983836	CLDN1(dist=115896),P3H2(dist=18187)	intergenic	NA	306|630	s19557,s19558,s19559|s19557,s292732,s19559	b1_1_197983530|b2_1_197983530	-	Reference,QK11,QK12,WZM11,YUN11,YUN12,KER12,DOR11,DOR12,FRI12,MER11,MER12,SFK11,SFK12,TEX11,CHA12,WDU11,WDU12,RMV12,WAG11,WAG12|KAZ11,KAZ12,WZM12,KER11,FRI11,ROM11,ROM12,TEX12,CHA11,RMV11
1	201162300	201162413	ST6GAL1(dist=147973),TRNAK-UUU(dist=5145)	intergenic	NA	113|529	s19703,s19704,s19705|s19703,s413530,s19705	b1_1_201162300|b2_1_201162300	-	Reference,KAZ11,KAZ12,QK11,QK12,WZM11,WZM12,YUN11,YUN12,KER11,KER12,DOR11,DOR12,FRI11,FRI12,MER12,ROM11,ROM12,SFK11,SFK12,TEX11,TEX12,CHA11,CHA12,WDU11,RMV11,RMV12,WAG11,WAG12|MER11
1	201215059	201215577	ADIPOQ(dist=12789),RFC4(dist=9273)	intergenic	NA	518|1399	s19707,s19708,s19709|s19707,s416345,s19709	b1_1_201215059|b2_1_201215059	-	Reference,KAZ11,KAZ12,QK11,QK12,WZM11,WZM12,YUN11,YUN12,KER11,KER12,DOR11,DOR12,FRI11,FRI12,MER11,ROM11,ROM12,SFK11,SFK12,TEX11,TEX12,CHA11,CHA12,RMV12,WAG11,WAG12|MER12,WDU11,RMV11
1	202045702	202045972	LOC101105876	intronic	NA	270|313	s19749,s19750,s19751,s19752,s19753|s19749,s19750,s19751,s410230,s19753	b1_1_202045702|b2_1_202045702	-	Reference,KAZ11,QK11,YUN11,YUN12,KER11,KER12,DOR11,DOR12,FRI11,MER11,ROM12,SFK11,SFK12,TEX11,TEX12,CHA11,CHA12,WDU11,WDU12,RMV11,RMV12,WAG12|FRI12,RMV11
1	203859472	203859640	LOC101123171(dist=2399),LOC101108715(dist=35853)	intergenic	NA	168|367	s19870,s19871,s19872|s19870,s372220,s19872	b1_1_203859472|b2_1_203859472	-	Reference,KAZ11,KAZ12,QK11,WZM12,YUN11,YUN12,KER11,KER12,DOR11,DOR12,FRI11,FRI12,MER11,MER12,ROM11,ROM12,SFK11,SFK12,TEX11,TEX12,CHA11,CHA12,WDU11,WDU12,RMV11,RMV12,WAG11,WAG12|WZM11
1	204308259	204308881	KLHL24(dist=28533),KLHL6(dist=35162)	intergenic	NA	622|622	s19880,s19881,s19882|s19880,s355981,s19882	b1_1_204308259|b2_1_204308259	-	Reference,KAZ11,KAZ12,QK11,QK12,YUN11,YUN12,KER12,DOR11,FRI11,FRI12,MER11,MER12,SFK12,RMV11,RMV12,WAG12|WZM11,WZM12,KER11,DOR12,ROM11,ROM12,SFK11,TEX11,TEX12,CHA11,CHA12,WDU12,WAG11
1	205329236	205330772	TRNAS-GGA(dist=219894),TRNAS-GGA(dist=198277)	intergenic	NA	1536|2671	s19929,s19930,s19931|s19929,s375361,s19931	b1_1_205329236|b2_1_205329236	-	Reference,KAZ11,KAZ12,QK11,QK12,WZM11,YUN11,YUN12,KER11,KER12,DOR11,DOR12,FRI11,FRI12,MER11,MER12,ROM12,SFK11,SFK12,TEX11,TEX12,CHA11,CHA12,WDU11,WDU12,RMV11,RMV12,WAG11,WAG12|WZM12,ROM11
1	205365974	205366491	TRNAS-GGA(dist=256632),TRNAS-GGA(dist=162558)	intergenic	NA	517|525	s19934,s19935,s19936|s19934,s290117,s19936	b1_1_205365974|b2_1_205365974	-	Reference,KAZ12,QK12,WZM11,YUN11,YUN12,KER11,DOR11,DOR12,MER11,MER12,ROM12,SFK11,TEX12,CHA11,CHA12,WDU11,WDU12,RMV11,RMV12,WAG11|KAZ11,QK11,WZM12,KER12,FRI11,FRI12,ROM11,SFK12,TEX11,WAG12
1	205794021	205794228	LOC101103939(dist=28637),TRNAR-CCU(dist=139081)	intergenic	NA	207|242	s19957,s19958,s19959|s19957,s306283,s19959	b1_1_205794021|b2_1_205794021	-	Reference,KAZ11,QK11,WZM11,WZM12,YUN12,KER12,DOR11,DOR12,FRI11,FRI12,MER11,MER12,ROM11,ROM12,SFK11,SFK12,TEX11,TEX12,CHA11,CHA12,WDU11,WDU12,RMV11,RMV12,WAG11,WAG12|KAZ12,QK12,YUN11,KER11
1	206077327	206077715	TRNAW-CCA(dist=101930),SOX2(dist=45203)	intergenic	NA	388|350	s19976,s19977,s19978|s19976,s432410,s19978	b1_1_206077327|b2_1_206077327	-	Reference,KAZ11,KAZ12,QK11,QK12,WZM11,WZM12,YUN11,YUN12,KER11,KER12,DOR11,DOR12,FRI11,FRI12,MER11,MER12,ROM11,ROM12,SFK11,SFK12,TEX12,CHA11,CHA12,WDU11,WDU12,RMV11,RMV12,WAG11,WAG12|TEX11
1	206754387	206754558	TRNAW-CCA(dist=32363),DNAJC19(dist=114860)	intergenic	NA	171|4757	s20039,s20040,s20041|s20039,s387396,s20041	b1_1_206754387|b2_1_206754387	-	Reference,KAZ11,KAZ12,QK11,QK12,WZM11,WZM12,YUN11,KER11,KER12,DOR11,DOR12,FRI11,FRI12,MER11,MER12,ROM11,SFK11,TEX11,TEX12,CHA11,CHA12,WDU11,RMV11,RMV12,WAG11,WAG12|YUN12,ROM12
1	206965868	206966427	FXR1(dist=15148),CCDC39(dist=182094)	intergenic	NA	559|2131	s20048,s20049,s20050|s20048,s290133,s20050	b1_1_206965868|b2_1_206965868	-	Reference,KAZ12,WZM12,YUN11,YUN12,KER11,KER12,DOR12,FRI12,MER11,TEX12,WDU11,WDU12|KAZ11,QK11,QK12,WZM11,DOR11,FRI11,MER12,ROM11,ROM12,SFK11,TEX11,CHA11,CHA12,RMV11,RMV12,WAG11,WAG12
1	207517647	207517763	TTC14(dist=301333),PEX5L(dist=377949)	intergenic	NA	116|1574	s20111,s20112,s20113|s20111,s363681,s20113	b1_1_207517647|b2_1_207517647	-	Reference,KAZ11,KAZ12,QK11,QK12,WZM11,YUN11,YUN12,KER11,KER12,DOR11,DOR12,FRI11,FRI12,MER11,MER12,ROM12,TEX11,TEX12,CHA11,CHA12,WDU11,WAG11|WZM12,SFK11,SFK12,WDU12,RMV11,RMV12,WAG12
1	207984836	207985110	PEX5L	intronic	NA	274|1073	s20142,s20143,s20144|s20142,s403801,s20144	b1_1_207984836|b2_1_207984836	-	Reference,KAZ11,KAZ12,QK11,QK12,WZM11,WZM12,YUN11,YUN12,KER11,KER12,DOR11,FRI11,MER11,ROM11,ROM12,TEX12,CHA11,CHA12,WDU11,WDU12,RMV11,RMV12,WAG11,WAG12|DOR12,FRI12,MER12,SFK11,SFK12,TEX11
1	208829946	208832584	ZMAT3(dist=20954),TRNAG-UCC(dist=19066)	intergenic	NA	2638|2080	s20230,s20231,s20232|s20230,s440512,s20232	b1_1_208829946|b2_1_208829946	-	Reference,KAZ11,KAZ12,QK11,QK12,WZM11,WZM12,YUN11,YUN12,KER11,KER12,DOR11,DOR12,FRI11,FRI12,MER11,MER12,ROM11,ROM12,SFK11,SFK12,TEX11,TEX12,CHA11,CHA12,RMV11,RMV12,WAG11,WAG12|WDU12
1	209355551	209356415	KCNMB2(dist=184396),LOC101110986(dist=68735)	intergenic	NA	864|2802	s20283,s20284,s20285|s20283,s334651,s20285	b1_1_209355551|b2_1_209355551	-	Reference,KAZ11,KAZ12,QK12,WZM11,WZM12,YUN11,KER11,KER12,DOR11,DOR12,FRI12,ROM11,SFK11,SFK12,TEX12,CHA11,WDU11,RMV11,RMV12,WAG12|QK11,YUN12,FRI11,MER11,MER12,ROM12,TEX11,CHA12,WDU11,WAG11
1	209851220	209851913	LOC101110986(dist=424572),TRNAE-UUC(dist=722884)	intergenic	NA	693|639	s20350,s20351,s20352|s20350,s293611,s20352	b1_1_209851220|b2_1_209851220	-	Reference,KAZ12,DOR11,DOR12,MER11,ROM12,CHA12|KAZ11,QK11,QK12,WZM11,WZM12,YUN11,YUN12,KER11,KER12,FRI11,FRI12,MER12,ROM11,SFK11,SFK12,TEX11,TEX12,CHA11,WDU11,WDU12,RMV11,RMV12,WAG11,WAG12
1	211500681	211501057	TRNAS-GGA(dist=392508),NAALADL2(dist=498533)	intergenic	NA	376|232	s20483,s20484,s20485|s20483,s306319,s20485	b1_1_211500681|b2_1_211500681	-	Reference,WZM12,YUN11,YUN12,KER11,KER12,DOR11,DOR12,FRI12,SFK11,SFK12,TEX11,CHA12,WAG11|KAZ12,QK11,QK12,WZM11,FRI11,MER11,MER12,ROM11,ROM12,TEX12,CHA11,WDU11,WDU12,RMV11,RMV12,WAG12
1	211750883	211751033	TRNAS-GGA(dist=642710),NAALADL2(dist=248557)	intergenic	NA	150|150	s20522,s20523,s20524|s20522,s439128,s20524	b1_1_211750883|b2_1_211750883	-	Reference,KAZ12,QK11,QK12,WZM11,WZM12,YUN11,YUN12,KER11,KER12,DOR11,DOR12,FRI11,FRI12,MER11,MER12,ROM11,ROM12,SFK11,SFK12,TEX11,TEX12,CHA11,CHA12,WDU12,RMV11,RMV12,WAG11,WAG12|WDU11
1	211892423	211892790	TRNAS-GGA(dist=784250),NAALADL2(dist=106800)	intergenic	NA	367|468	s20543,s20544,s20545|s20543,s411349,s20545	b1_1_211892423|b2_1_211892423	-	Reference,KAZ12,QK11,QK12,WZM11,WZM12,YUN11,YUN12,KER11,KER12,DOR11,DOR12,FRI11,FRI12,MER12,ROM11,ROM12,SFK11,SFK12,TEX11,TEX12,CHA11,CHA12,WDU11,WDU12,RMV11,RMV12,WAG11,WAG12|MER11
1	212118208	212119176	NAALADL2	intronic	NA	968|2119	s20586,s20587,s20588|s20586,s375337,s20588	b1_1_212118208|b2_1_212118208	-	Reference,KAZ12,QK11,QK12,WZM11,YUN11,YUN12,KER11,DOR11,DOR12,FRI11,FRI12,MER11,MER12,ROM11,ROM12,SFK11,SFK12,CHA11,CHA12,WDU12,RMV11,RMV12,WAG11,WAG12|WZM12,KER12,TEX11,TEX12,WDU11
1	212188218	212188393	NAALADL2	intronic	NA	175|592	s20597,s20598,s20599|s20597,s360210,s20599	b1_1_212188218|b2_1_212188218	-	Reference,KAZ12,QK11,QK12,WZM11,WZM12,YUN12,KER11,KER12,DOR11,DOR12,FRI12,MER11,MER12,ROM11,ROM12,SFK11,SFK12,TEX11,TEX12,CHA11,CHA12,WDU11,WDU12,RMV11,RMV12,WAG12|YUN11,FRI11,WAG11
1	212237701	212244814	NAALADL2	exonic	NA	7113|14866	s20609,s20610,s20611,s20612|s20609,s20610,s20611,s360214,s20612	b1_1_212237701|b2_1_212237701	-	Reference,KAZ12,QK11,QK12,WZM11,WZM12,YUN12,KER11,KER12,DOR11,FRI12,MER11,MER12,ROM11,SFK11,SFK12,TEX11,TEX12,CHA11,CHA12,WDU12,RMV12,WAG12|DOR12,ROM12,WDU11,WAG11
1	212388925	212389749	NAALADL2	intronic	NA	824|1095	s20632,s20633,s20634|s20632,s360215,s20634	b1_1_212388925|b2_1_212388925	-	Reference,KAZ12,QK11,QK12,WZM11,WZM12,YUN11,DOR11,DOR12,FRI11,MER11,MER12,TEX11,TEX12,WDU11,RMV11,RMV12|YUN12,KER11,KER12,FRI12,ROM11,ROM12,SFK11,SFK12,CHA11,CHA12,WDU12,WAG11,WAG12
1	212420270	212420816	NAALADL2	intronic	NA	546|607	s20636,s20637,s20638|s20636,s360216,s20638	b1_1_212420270|b2_1_212420270	-	Reference,KAZ12,DOR11,FRI11,MER12|QK11,QK12,WZM11,WZM12,YUN11,YUN12,KER11,KER12,DOR12,FRI12,MER11,ROM11,ROM12,SFK11,SFK12,TEX11,TEX12,CHA11,CHA12,WDU11,WDU12,RMV11,RMV12,WAG11,WAG12
1	212595348	212595769	NAALADL2	intronic	NA	421|1347	s20664,s20665,s20666|s20664,s306343,s20666	b1_1_212595348|b2_1_212595348	-	Reference,QK12,WZM11,WZM12,YUN11,KER11,DOR12,FRI11,FRI12,MER12,SFK12,CHA11,WDU11,RMV12,WAG11,WAG12|KAZ12,QK11,YUN12,KER12,DOR11,MER11,ROM11,ROM12,SFK11,TEX11,TEX12,CHA12,WDU12,RMV11
1	212824114	212824438	NAALADL2	intronic	NA	324|384	s20718,s20719,s20720|s20718,s20719,s306353,s20720	b1_1_212824114|b2_1_212824114	-	Reference,KAZ11,QK12,WZM11,WZM12,YUN11,YUN12,KER11,KER12,DOR11,DOR12,FRI11,FRI12,MER11,MER12,ROM11,SFK11,SFK12,TEX11,TEX12,CHA11,CHA12,WDU11,WDU12,RMV11,RMV12,WAG11,WAG12|KAZ12,ROM12
1	213332788	213333209	NAALADL2	intronic	NA	421|817	s20793,s20794,s20795|s20793,s279091,s20795	b1_1_213332788|b2_1_213332788	-	Reference,KAZ12,QK12,WZM11,WZM12,YUN11,YUN12,KER11,DOR11,FRI12,MER11,ROM11,SFK12,TEX11,TEX12,CHA11,CHA12,RMV11,WAG11,WAG12|KAZ11,QK11,KER12,DOR12,FRI11,MER12,ROM12,SFK11,WDU11,RMV12
1	213632306	213633044	NAALADL2	intronic	NA	738|275	s20852,s20853,s20854|s20852,s306365,s20854	b1_1_213632306|b2_1_213632306	-	Reference,KAZ11,QK11,QK12,WZM11,WZM12,YUN11,YUN12,KER12,DOR11,DOR12,FRI11,FRI12,MER11,MER12,ROM11,ROM12,SFK11,SFK12,TEX11,TEX12,CHA11,CHA12,WDU11,RMV11,RMV12,WAG11,WAG12|KAZ12,KER11,WDU12
1	213720019	213720907	NAALADL2(dist=68424),TRNAS-GGA(dist=48788)	intergenic	NA	888|981	s20856,s20857,s20858|s20856,s416900,s20858	b1_1_213720019|b2_1_213720019	-	Reference,KAZ11,KAZ12,QK11,QK12,WZM11,WZM12,YUN11,YUN12,KER11,KER12,DOR11,DOR12,FRI11,FRI12,MER11,ROM11,ROM12,SFK11,SFK12,TEX11,CHA11,WDU11,WDU12,RMV11,RMV12,WAG11,WAG12|MER12,CHA12
1	214015340	214015691	NLGN1	intronic	NA	351|182	s20887,s20888,s20889,s20890,s20891,s20892|s20887,s306371,s20891,s20892	b1_1_214015340|b2_1_214015340	-	Reference|KAZ12,QK11,QK12,WZM11,WZM12,YUN11,YUN12,KER11,KER12,DOR11,DOR12,FRI11,FRI12,MER11,MER12,ROM11,ROM12,SFK11,SFK12,TEX11,TEX12,CHA11,CHA12,WDU11,WDU12,RMV11,RMV12,WAG11,WAG12
1	214194899	214195124	NLGN1	intronic	NA	225|1801	s20902,s20903,s20904|s20902,s417723,s20904	b1_1_214194899|b2_1_214194899	-	Reference,KAZ11,KAZ12,QK11,QK12,WZM11,WZM12,YUN11,YUN12,KER11,KER12,DOR11,DOR12,FRI11,FRI12,MER11,MER12,ROM12,SFK11,SFK12,TEX11,TEX12,CHA11,WDU11,WDU12,RMV12,WAG11,WAG12|ROM11,CHA12,RMV11
1	214443865	214450933	NLGN1	intronic	NA	7068|455	s20930,s20931,s20932|s20930,s430640,s20932	b1_1_214443865|b2_1_214443865	-	Reference,KAZ11,KAZ12,QK11,QK12,WZM11,WZM12,YUN11,YUN12,KER11,KER12,DOR11,DOR12,FRI11,FRI12,MER11,MER12,ROM11,ROM12,SFK11,TEX12,CHA11,CHA12,WDU11,WDU12,RMV11,RMV12,WAG11,WAG12|SFK12,TEX11
1	214481965	214482682	NLGN1	intronic	NA	717|3202	s20933,s20934,s20935|s20933,s436523,s20935	b1_1_214481965|b2_1_214481965	-	Reference,KAZ11,KAZ12,QK11,QK12,WZM11,WZM12,YUN11,YUN12,KER11,KER12,DOR11,DOR12,FRI11,FRI12,MER11,MER12,ROM11,ROM12,SFK11,SFK12,TEX11,TEX12,CHA12,WDU11,WDU12,RMV11,RMV12,WAG11,WAG12|CHA11
1	214636152	214636952	NLGN1(dist=47470),TRNAC-GCA(dist=140043)	intergenic	NA	800|513	s20948,s20949,s20950|s20948,s306375,s20950	b1_1_214636152|b2_1_214636152	-	Reference,KAZ11,QK11,QK12,WZM11,WZM12,YUN11,YUN12,KER11,KER12,DOR11,DOR12,FRI11,FRI12,MER11,MER12,ROM11,ROM12,SFK11,SFK12,TEX11,TEX12,CHA11,CHA12,WDU11,WDU12,RMV11,RMV12,WAG11,WAG12|KAZ12
1	215290609	215290735	SPATA16(dist=5473),ECT2(dist=113416)	intergenic	NA	126|269	s20999,s21000,s21001|s20999,s306380,s21001	b1_1_215290609|b2_1_215290609	-	Reference,KAZ11,QK12,YUN12,DOR11,MER12,ROM11,SFK11,SFK12,TEX11,CHA11,WDU11,RMV11,WAG12|KAZ12,QK11,WZM11,WZM12,YUN11,KER11,KER12,DOR12,FRI11,FRI12,MER11,ROM12,TEX12,CHA12,WDU12,RMV12,WAG11
1	215637210	215639941	NCEH1(dist=66735),TNFSF10(dist=41669)	intergenic	NA	2731|588	s21020,s21021,s21022|s21020,s358071,s21022	b1_1_215637210|b2_1_215637210	-	Reference,KAZ11,KAZ12,QK11,QK12,WZM12,YUN11,KER11,KER12,DOR11,DOR12,MER11,ROM11,SFK11,SFK12,WDU11,RMV11,WAG12|WZM11,YUN12,FRI11,FRI12,MER12,ROM12,TEX11,TEX12,CHA11,CHA12,WDU12,RMV12,WAG11
1	215774126	215774744	GHSR(dist=41073),FNDC3B(dist=40190)	intergenic	NA	618|441	s21029,s21030,s21031|s21029,s373334,s21031	b1_1_215774126|b2_1_215774126	-	Reference,KAZ11,KAZ12,QK11,QK12,WZM12,YUN11,YUN12,DOR11,DOR12,FRI11,MER11,MER12,ROM11,ROM12,SFK11,SFK12,TEX11,TEX12,CHA12,WDU11,RMV11,RMV12,WAG11,WAG12|WZM11,KER11,KER12,FRI12,CHA11,WDU12
1	216539560	216540035	PLD1	intronic	NA	475|1165	s21060,s21061,s21062|s21060,s420520,s21062	b1_1_216539560|b2_1_216539560	-	Reference,KAZ11,KAZ12,QK11,QK12,WZM11,WZM12,YUN11,YUN12,KER11,KER12,DOR11,DOR12,FRI11,FRI12,MER11,MER12,ROM11,ROM12,SFK11,SFK12,TEX11,TEX12,CHA11,CHA12,WDU11,WDU12,RMV11,WAG11,WAG12|RMV12
1	216631423	216631572	TRNAC-ACA(dist=9223),TNIK(dist=79366)	intergenic	NA	149|102	s21072,s21073,s21074|s21072,s279047,s21074	b1_1_216631423|b2_1_216631423	-	Reference|KAZ11,KAZ12,QK11,QK12,WZM11,KER11,KER12,DOR11,FRI12,MER11,ROM11,SFK11,SFK12,TEX11,CHA12,WAG11,WAG12
1	219443265	219443785	LOC101114669(dist=20741),GOLIM4(dist=555726)	intergenic	NA	520|1161	s21236,s21237,s21238|s21236,s346574,s21238	b1_1_219443265|b2_1_219443265	-	Reference,KAZ11,KAZ12,QK11,WZM11,WZM12,YUN11,YUN12,KER11,KER12,DOR12,FRI11,FRI12,MER11,MER12,ROM11,SFK12,TEX11,TEX12,WDU11,WDU12,RMV11,RMV12,WAG11,WAG12|QK12,DOR11,ROM12,SFK11,CHA11,CHA12
1	220149595	220150791	GOLIM4(dist=66039),LOC101114926(dist=28948)	intergenic	NA	1196|517	s21283,s21284,s21285|s21283,s363714,s21285	b1_1_220149595|b2_1_220149595	-	Reference,KAZ11,KAZ12,QK11,QK12,WZM11,WZM12,YUN11,YUN12,KER11,KER12,DOR11,DOR12,FRI11,FRI12,MER11,MER12,ROM11,ROM12,SFK11,SFK12,TEX11,TEX12,WDU11,WDU12,RMV11,RMV12,WAG11|CHA11,CHA12,WAG12
1	220163512	220163882	GOLIM4(dist=79956),LOC101114926(dist=15857)	intergenic	NA	370|637	s21287,s21288,s21289|s21287,s329170,s21289	b1_1_220163512|b2_1_220163512	-	Reference,KAZ11,KAZ12,QK12,WZM11,WZM12,YUN11,YUN12,KER11,KER12,DOR12,FRI11,FRI12,MER11,MER12,ROM11,SFK12,TEX11,CHA11,CHA12,WDU11,RMV11,WAG12|QK11,DOR11,ROM12,SFK11,TEX12,WDU12,RMV12,WAG11
1	221039583	221040586	TRNAS-GGA(dist=22795),LOC121816987(dist=973589)	intergenic	NA	1003|2940	s21388,s21389,s21390|s21388,s306403,s21390	b1_1_221039583|b2_1_221039583	-	Reference,KAZ11,QK11,QK12,WZM11,WZM12,YUN11,KER11,KER12,DOR11,FRI12,MER11,MER12,ROM11,ROM12,SFK11,SFK12,TEX11,WDU11,WDU12,RMV11,RMV12,WAG11,WAG12|KAZ12,YUN12,DOR12,FRI11,TEX12,CHA11,CHA12
1	221617805	221625412	TRNAS-GGA(dist=601017),LOC121816987(dist=388763)	intergenic	NA	7607|985	s21465,s21466,s21467|s21465,s277497,s21467	b1_1_221617805|b2_1_221617805	-	Reference,FRI12,ROM11|KAZ11,KAZ12,QK11,QK12,WZM11,WZM12,YUN11,YUN12,KER11,KER12,DOR11,DOR12,FRI11,MER11,MER12,ROM12,SFK11,SFK12,TEX11,TEX12,CHA11,CHA12,WDU11,WDU12,RMV11,RMV12,WAG11,WAG12
1	221648239	221651801	TRNAS-GGA(dist=631451),LOC121816987(dist=362374)	intergenic	NA	3562|5929	s21469,s21470,s21471|s21469,s373328,s21471	b1_1_221648239|b2_1_221648239	-	Reference,KAZ11,KAZ12,QK11,QK12,WZM12,YUN11,YUN12,KER11,KER12,DOR11,DOR12,FRI11,FRI12,MER11,MER12,ROM11,ROM12,SFK11,SFK12,TEX11,TEX12,CHA11,CHA12,WDU11,WDU12,RMV11,RMV12,WAG11,WAG12|WZM11
1	221770797	221770917	TRNAS-GGA(dist=754009),LOC121816987(dist=243258)	intergenic	NA	120|2698	s21498,s21499,s21500|s21498,s390460,s21500	b1_1_221770797|b2_1_221770797	-	Reference,KAZ11,KAZ12,QK11,QK12,WZM11,WZM12,YUN11,YUN12,DOR11,DOR12,FRI11,FRI12,MER11,MER12,ROM11,ROM12,SFK11,SFK12,TEX11,TEX12,CHA11,CHA12,WDU11,WDU12,RMV11,RMV12,WAG11,WAG12|KER11,KER12
1	222391662	222391803	BCHE(dist=145952),SLITRK3(dist=461067)	intergenic	NA	141|137	s21594,s21595,s21596|s21594,s441797,s21596	b1_1_222391662|b2_1_222391662	-	Reference,KAZ11,KAZ12,QK11,QK12,WZM11,WZM12,YUN11,YUN12,KER11,KER12,DOR11,DOR12,FRI11,FRI12,MER11,MER12,ROM11,ROM12,SFK11,SFK12,TEX11,TEX12,CHA11,CHA12,WDU11,RMV11,RMV12,WAG11,WAG12|WDU12
1	222567199	222567325	BCHE(dist=321489),SLITRK3(dist=285545)	intergenic	NA	126|904	s21630,s21631,s21632|s21630,s426779,s21632	b1_1_222567199|b2_1_222567199	-	Reference,KAZ11,KAZ12,QK11,QK12,WZM11,WZM12,YUN11,YUN12,KER11,KER12,DOR11,DOR12,FRI11,FRI12,MER11,MER12,ROM11,SFK11,SFK12,TEX11,TEX12,CHA11,CHA12,WDU12,RMV11,RMV12,WAG11,WAG12|ROM12
1	222573402	222575000	BCHE(dist=327692),SLITRK3(dist=277870)	intergenic	NA	1598|2484	s21632,s21633,s21634|s21632,s306424,s21634	b1_1_222573402|b2_1_222573402	-	Reference,KAZ11,WZM11,KER11,KER12,ROM11,SFK11,SFK12,TEX12,CHA11,CHA12,WAG12|KAZ12,QK11,QK12,WZM12,YUN11,YUN12,DOR11,DOR12,FRI11,FRI12,MER11,MER12,ROM12,TEX11,WDU12,RMV11,RMV12,WAG11
1	223274468	223276309	SI(dist=218266),LOC101116449(dist=264808)	intergenic	NA	1841|881	s21750,s21751,s21752|s21750,s373316,s21752	b1_1_223274468|b2_1_223274468	-	Reference,KAZ11,KAZ12,QK11,QK12,WZM12,YUN11,YUN12,KER11,KER12,DOR11,DOR12,FRI11,FRI12,MER11,MER12,ROM11,ROM12,SFK11,TEX11,TEX12,CHA11,CHA12,WDU11,RMV11,RMV12,WAG11,WAG12|WZM11,SFK12,WDU12
1	223277650	223277981	SI(dist=221448),LOC101116449(dist=263136)	intergenic	NA	331|430	s21752,s21753,s21754|s21752,s265889,s21754	b1_1_223277650|b2_1_223277650	-	Reference,KAZ12,QK11,QK12,WZM11,WZM12,YUN12,KER11,KER12,DOR12,FRI11,FRI12,MER11,ROM11,ROM12,SFK11,SFK12,TEX11,TEX12,WDU11,WDU12,RMV11,RMV12|KAZ11,YUN11,DOR11,MER12,CHA11,CHA12,WAG11,WAG12
1	223363638	223365799	SI(dist=307436),LOC101116449(dist=175318)	intergenic	NA	2161|6292	s21769,s21770,s21771|s21769,s426781,s21771	b1_1_223363638|b2_1_223363638	-	Reference,KAZ11,KAZ12,QK11,WZM11,WZM12,YUN11,YUN12,KER11,KER12,DOR11,DOR12,FRI11,FRI12,MER11,MER12,ROM11,SFK11,SFK12,TEX11,TEX12,CHA11,CHA12,WDU11,WDU12,RMV11,RMV12,WAG11,WAG12|ROM12
1	223447505	223447705	SI(dist=391303),LOC101116449(dist=93412)	intergenic	NA	200|159	s21786,s21787,s21788|s21786,s375318,s21788	b1_1_223447505|b2_1_223447505	-	Reference,KAZ11,KAZ12,QK11,QK12,WZM11,YUN11,YUN12,KER11,KER12,DOR11,DOR12,FRI11,FRI12,MER11,MER12,ROM11,ROM12,SFK11,SFK12,TEX11,TEX12,CHA11,CHA12,WDU12,RMV12,WAG11,WAG12|WZM12,WDU11,RMV11
1	223450490	223452120	SI(dist=394288),LOC101116449(dist=88997)	intergenic	NA	1630|280	s21788,s21789,s21790|s21788,s375317,s21790	b1_1_223450490|b2_1_223450490	-	Reference,KAZ11,KAZ12,QK11,QK12,WZM11,YUN11,YUN12,KER11,KER12,DOR11,DOR12,FRI11,FRI12,MER11,MER12,ROM11,ROM12,SFK11,SFK12,TEX11,TEX12,CHA11,CHA12,WDU12,RMV11,RMV12,WAG11,WAG12|WZM12,WDU11
1	223953446	223954180	LOC101116449(dist=410106),LOC101103029(dist=549168)	intergenic	NA	734|638	s21874,s21875,s21876|s21874,s375313,s21876	b1_1_223953446|b2_1_223953446	-	Reference,KAZ11,KAZ12,QK11,QK12,WZM11,YUN12,KER11,KER12,FRI12,MER11,ROM12,SFK11,SFK12,TEX11,CHA11,CHA12,WDU11,WDU12,RMV11,RMV12,WAG11,WAG12|WZM12,YUN11,DOR11,DOR12,FRI11,MER12,ROM11,TEX12
1	223962421	223966226	LOC101116449(dist=419081),LOC101103029(dist=537122)	intergenic	NA	3805|666	s21878,s21879,s21880|s21878,s375311,s21880	b1_1_223962421|b2_1_223962421	-	Reference,KAZ11,KAZ12,QK11,QK12,WZM11,YUN12,KER11,KER12,FRI12,MER11,ROM12,SFK11,SFK12,TEX11,CHA11,CHA12,WDU11,WDU12,RMV11,RMV12,WAG11,WAG12|WZM12,YUN11,DOR11,DOR12,FRI11,MER12,ROM11,TEX12
1	224114678	224116464	LOC101116449(dist=571338),LOC101103029(dist=386884)	intergenic	NA	1786|210	s21909,s21910,s21911|s21909,s329213,s21911	b1_1_224114678|b2_1_224114678	-	Reference,KAZ11,KAZ12,QK12,WZM11,WZM12,YUN11,YUN12,KER11,KER12,DOR11,DOR12,FRI11,FRI12,MER11,MER12,ROM11,ROM12,SFK11,SFK12,TEX11,TEX12,CHA11,CHA12,WDU11,WDU12,RMV11,RMV12,WAG11,WAG12|QK11
1	224524140	224524469	LOC101103029(dist=19527),NONE(dist=NONE)	intergenic	NA	329|250	s21979,s21980,s21981|s21979,s265918,s21981	b1_1_224524140|b2_1_224524140	-	Reference,KAZ12,QK12,WZM12,YUN11,KER11,KER12,DOR11,FRI11,MER11,MER12,ROM11,ROM12,SFK11,SFK12,TEX12,CHA11,CHA12,WDU11,WDU12,RMV11,RMV12,WAG11,WAG12|KAZ11,QK11,WZM11,YUN12,DOR12,FRI12,TEX11
1	224613670	224613781	LOC101103029(dist=109057),OTOL1(dist=1942066)	intergenic	NA	111|238	s22007,s22008,s22009|s22007,s411367,s22009	b1_1_224613670|b2_1_224613670	-	Reference,KAZ11,KAZ12,QK11,QK12,WZM11,WZM12,YUN11,YUN12,KER11,KER12,DOR11,DOR12,FRI11,FRI12,MER12,ROM11,ROM12,SFK11,SFK12,TEX11,TEX12,CHA11,CHA12,WDU11,WDU12,RMV11,RMV12,WAG11,WAG12|MER11
1	224779073	224781743	LOC101103029(dist=274460),OTOL1(dist=1774104)	intergenic	NA	2670|2649	s22034,s22035,s22036|s22034,s265927,s22036	b1_1_224779073|b2_1_224779073	-	Reference,MER11|KAZ11,KAZ12,QK11,QK12,WZM11,WZM12,YUN11,YUN12,KER11,KER12,DOR11,DOR12,FRI11,FRI12,MER12,ROM11,ROM12,SFK11,SFK12,TEX11,TEX12,CHA11,CHA12,WDU11,WDU12,RMV11,RMV12,WAG11,WAG12
1	224885734	224886207	LOC101103029(dist=381121),OTOL1(dist=1669640)	intergenic	NA	473|387	s22065,s22066,s22067|s22065,s427896,s22067	b1_1_224885734|b2_1_224885734	-	Reference,KAZ11,KAZ12,QK11,WZM11,WZM12,YUN11,KER11,KER12,DOR11,DOR12,FRI11,FRI12,MER11,MER12,ROM11,ROM12,SFK12,TEX11,TEX12,CHA11,CHA12,WDU11,WDU12,RMV11,RMV12,WAG11,WAG12|QK12,YUN12,SFK11
1	225242892	225243151	LOC101103029(dist=738279),OTOL1(dist=1312696)	intergenic	NA	259|708	s22137,s22138,s22139|s22137,s346595,s22139	b1_1_225242892|b2_1_225242892	-	Reference,KAZ11,KAZ12,QK11,WZM11,WZM12,YUN11,YUN12,KER11,KER12,DOR11,FRI11,FRI12,MER11,MER12,ROM11,ROM12,SFK11,SFK12,TEX11,TEX12,WDU11,WDU12,RMV11,RMV12,WAG11,WAG12|QK12,CHA11,CHA12
1	225426831	225427110	LOC101103029(dist=922218),OTOL1(dist=1128737)	intergenic	NA	279|364	s22168,s22169,s22170|s22168,s265948,s22170	b1_1_225426831|b2_1_225426831	-	Reference,QK11,WZM11,KER11,KER12,SFK12,WAG11|KAZ11,KAZ12,QK12,WZM12,YUN11,YUN12,DOR11,FRI11,FRI12,MER11,MER12,ROM11,ROM12,SFK11,TEX11,TEX12,CHA11,CHA12,WDU11,WDU12,RMV11,RMV12,WAG12
1	225998001	225998247	LOC101103029(dist=1493388),OTOL1(dist=557600)	intergenic	NA	246|985	s22261,s22262,s22263|s22261,s360550,s22263	b1_1_225998001|b2_1_225998001	-	Reference,KAZ11,KAZ12,QK11,QK12,WZM11,WZM12,YUN11,YUN12,KER11,KER12,DOR11,DOR12,FRI11,FRI12,MER11,MER12,ROM11,ROM12,SFK11,SFK12,TEX11,TEX12,CHA11,CHA12,WDU12,RMV11,WAG12|WAG11
1	226243179	226244164	LOC101103029(dist=1738566),OTOL1(dist=311683)	intergenic	NA	985|1041	s22298,s22299,s22300|s22298,s432424,s22300	b1_1_226243179|b2_1_226243179	-	Reference,KAZ11,KAZ12,QK11,QK12,WZM11,WZM12,YUN11,YUN12,KER11,KER12,DOR11,DOR12,FRI11,FRI12,MER11,MER12,ROM11,ROM12,SFK11,SFK12,TEX12,CHA11,CHA12,WDU11,RMV11,RMV12,WAG11,WAG12|TEX11,WDU12
1	226318686	226318873	LOC101103029(dist=1814073),OTOL1(dist=236974)	intergenic	NA	187|792	s22311,s22312,s22313|s22311,s418292,s22313	b1_1_226318686|b2_1_226318686	-	Reference,KAZ11,KAZ12,QK11,QK12,WZM11,WZM12,YUN11,YUN12,KER11,KER12,DOR11,DOR12,FRI11,FRI12,MER11,MER12,ROM11,ROM12,SFK11,SFK12,TEX11,TEX12,CHA11,CHA12,WDU11,WDU12,WAG11,WAG12|RMV11
1	227359545	227359772	PPM1L	intronic	NA	227|186	s22438,s22439,s22440|s22438,s265987,s22440	b1_1_227359545|b2_1_227359545	-	Reference,KAZ12,QK12,WZM11,WZM12,YUN11,YUN12,DOR11,DOR12,FRI11,FRI12,MER11,MER12,ROM11,ROM12,SFK11,SFK12,TEX11,TEX12,CHA11,CHA12,WDU11,WDU12,WAG11|KAZ11,QK11,KER11,KER12,RMV11,RMV12,WAG12
1	227467480	227469080	PPM1L(dist=49340),ARL14(dist=34527)	intergenic	NA	1600|120	s22457,s22458,s22459|s22457,s329247,s22459	b1_1_227467480|b2_1_227467480	-	Reference,KAZ11,KAZ12,WZM11,WZM12,YUN11,YUN12,KER11,KER12,DOR11,DOR12,FRI12,MER12,ROM11,SFK11,SFK12,TEX11,TEX12,CHA11,CHA12,WDU11,WDU12,RMV11,RMV12,WAG11,WAG12|QK11,FRI11,MER11,ROM12
[truncated: 5,935 more rows]

## Sheet: S7
Supplemental Table S7 Information of multiallelic variations.
[truncated: 14,708 more rows]

## Sheet: S8
Supplemental Table S8 Manual validation of SVs. Fifty SVs were randomly selected from each range from 50-100bp, 100-500bp, 500-1000bp, 1000-5000bp and >5000bp.
[truncated: 8 more rows]

[truncated: 9 more sheets: S9, S10, S11, S12, S13, S14, S15, S16, S17]
